# Supplementary material for: Radiation-induced aerobic oxidation via solvent-derived peroxyl radicals
Source: PubMed Central journal article supplement — Chem Sci. 2024 Dec 23;16(4):1867–75. doi: 10.1039/d4sc05558f (PMC11665616; doi:10.1039/d4sc05558f), 2024-12-23
Supplement: SC-OLF-D4SC05558F-s001.pdf [file SC-OLF-D4SC05558F-s001.pdf]

Supplementary information for

## Radiation-induced aerobic oxidation *via* solvent-derived peroxy radicals

Yang Xu,<sup>‡a</sup> Bo-Shuai Mu,<sup>‡\*a</sup> Zhiyu Tu,<sup>a</sup> Weiqiu Liang,<sup>a</sup> Jiahao Li,<sup>a</sup> Ziyang Sang<sup>a</sup> and Zhibo Liu<sup>\*abcd</sup>

<sup>a</sup>Beijing National Laboratory for Molecular Sciences, Radiochemistry and Radiation Chemistry Key Laboratory of Fundamental Science, Key Laboratory of Bioorganic Chemistry and Molecular Engineering of Ministry of Education, College of Chemistry and Molecular Engineering, Peking University, Beijing 100871, China

<sup>b</sup>Peking University–Tsinghua University Center for Life Sciences, Peking University, Beijing 100871, China

<sup>c</sup>Changping Laboratory, Beijing 102206, China

<sup>d</sup>Key Laboratory of Carcinogenesis and Translational Research (Ministry of Education/Beijing), NMPA Key Laboratory for Research and Evaluation of Radiopharmaceuticals (National Medical Products Administration), Department of Nuclear Medicine, Peking University Cancer Hospital & Institute, Beijing 100142, China

\*Corresponding authors: Bo-Shuai Mu; Zhibo Liu. E-mail: boshuai\_mu@pku.edu.cn; zbliu@pku.edu.cn.

‡These authors contributed equally to this work.

| Table of Contents                                                                                 | Page    |
|---------------------------------------------------------------------------------------------------|---------|
| 1. General information                                                                            | 1       |
| 2. The optimization of reaction conditions                                                        | 2–4     |
| 3. Substrate scope studies                                                                        | 5–28    |
| 4. Mechanistic studies                                                                            | 29–33   |
| 4.1 Control experiments                                                                           | 29      |
| 4.2 ROS detection using fluorescence probe DCFH                                                   | 30      |
| 4.3 O <sub>2</sub> <sup>•-</sup> detection using O <sub>2</sub> <sup>•-</sup> -specific probe NBT | 30      |
| 4.4 Quenching experiments                                                                         | 31      |
| 4.5 Kinetic studies with CD <sub>3</sub> CN as the solvent                                        | 33      |
| 5. Computational studies                                                                          | 34–36   |
| 5.1 Computational details                                                                         | 34      |
| 5.2 Radiolysis of CH <sub>3</sub> CN in the presence of O <sub>2</sub>                            | 34      |
| 5.3 Intrinsic reaction coordinate (IRC) analysis                                                  | 35      |
| 5.4 Distortion-interaction analysis                                                               | 36      |
| 6. NMR spectra                                                                                    | 37–111  |
| 7. Cartesian coordinates of all the optimized geometries                                          | 112–120 |
| 8. References                                                                                     | 121     |

## 1. General information

All available reagents and solvents were purchased from commercial suppliers and were used as received without further purification. The retention factor ( $R_f$ ) of analytical thin-layer chromatography (TLC) was recorded by using the GF254 silica gel plate (0.23 mm coating, purchased from Yantai Huayang New Material Technology Co., Ltd). Plates were visualized by UV light or TLC stains (potassium permanganate or iodine).  $^1\text{H}$  NMR and  $^{13}\text{C}$  NMR spectra were recorded on a Bruker AVANCE 400 MHz Spectrometer (400 MHz for  $^1\text{H}$ ; 101 MHz for  $^{13}\text{C}$ ).  $^{19}\text{F}$  NMR spectra were recorded on a Bruker AVANCE 500 MHz Spectrometer (471 MHz for  $^{19}\text{F}$ ).  $^{31}\text{P}$  NMR spectra were recorded on a Bruker AVANCE 500 MHz or 600 MHz Spectrometer (202 MHz or 243 MHz for  $^{31}\text{P}$ ). For  $\text{CDCl}_3$  solutions, the chemical shifts ( $\delta$ ) are reported as parts per million (ppm) referenced to residual protium or carbon of the solvents;  $\text{CHCl}_3$   $\delta$  H (7.26 ppm) and  $\text{CDCl}_3$   $\delta$  C (77.16 ppm). Coupling constants are reported in Hertz (Hz). Chemical shift multiplicities are reported as follows: s = singlet, d = doublet, t = triplet, q = quartet, dd = doublet of doublets, m = multiplet. High-resolution mass spectrometry (HRMS) was performed on a Waters Vion<sup>TM</sup> IMS QToF Mass Spectrometer.

The reaction mixtures were purified by preparative thin-layer chromatography, preparative high performance liquid chromatography, or flash column chromatography. Preparative thin-layer chromatography purifications were performed on Silica Gel 60 GF254 plates (1 mm coating, purchased from Shanghai Haohong Scientific Co., Ltd). Preparative high performance liquid chromatography purifications were performed on a Waters 2545 Binary Gradient Module equipped with a Waters 2489 UV/Visible Detector and a Waters SunFire C18 OBD Prep Column (100 Å, 5  $\mu\text{m}$ , 30  $\times$  150 mm). Flash column chromatography purifications were performed on silica gel (200–300 mesh, purchased from Yantai Huayang New Material Technology Co., Ltd).

Gas chromatography-mass spectrometry (GC-MS) was performed on a SHIMADZU GCMS-QP2020 NX Gas Chromatograph-Mass Spectrometer. UV-visible absorption spectra were measured on a HITACHI U-3010 UV-VIS Spectrophotometer. Fluorescence spectra were measured on a HITACHI F-7000 FL Spectrophotometer.

All reactants were irradiated with  $\gamma$ -rays from a  $^{60}\text{Co}$  source (Department of Applied Chemistry of Peking University).

## 2. The optimization of reaction conditions

General procedure for the optimization of reaction conditions:

A 130 mL test tube was charged with 15 mL of solution containing **1a** (37.3 mg, 0.3 mmol). Then the test tube was sealed and exposed to  $^{60}\text{Co}$   $\gamma$ -ray radiation (dose rate:  $110\text{ Gy min}^{-1}$ , measured using a Fricke dosimeter) at room temperature for a specific time. After the reaction, the reaction mixture was diluted and analyzed by GC-MS with 1,3,5-trimethoxybenzene as the internal standard.

**Table S1** Evaluation of the solvent<sup>a</sup>

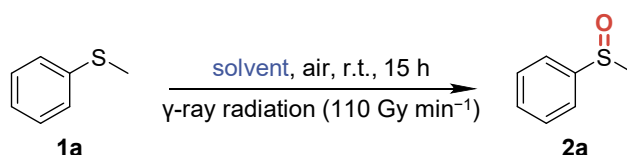

| Entry | Solvent            | Yield of <b>2a</b> (%) <sup>b</sup> | Entry | Solvent                         | Yield of <b>2a</b> (%) <sup>b</sup> |
|-------|--------------------|-------------------------------------|-------|---------------------------------|-------------------------------------|
| 1     | CH <sub>3</sub> CN | 95                                  | 13    | Acetone                         | 75                                  |
| 2     | Benzonitrile       | 49                                  | 14    | Hexane                          | 28                                  |
| 3     | Phenylacetonitrile | 34                                  | 15    | Cyclohexane                     | 22                                  |
| 4     | Butyronitrile      | 72                                  | 16    | DMF                             | 21                                  |
| 5     | Valeronitrile      | 32                                  | 17    | DMA                             | 16                                  |
| 6     | CH <sub>3</sub> OH | 87                                  | 18    | DMSO                            | Trace                               |
| 7     | EtOH               | 66                                  | 19    | Benzene                         | 20                                  |
| 8     | <i>i</i> -PrOH     | 44                                  | 20    | Toluene                         | 24                                  |
| 9     | Et <sub>2</sub> O  | 25                                  | 21    | CH <sub>2</sub> Cl <sub>2</sub> | n.d.                                |
| 10    | THF                | 18                                  | 22    | CHCl <sub>3</sub>               | n.d.                                |
| 11    | 1,4-Dioxane        | 17                                  | 23    | CCl <sub>4</sub>                | n.d.                                |
| 12    | EtOAc              | 62                                  |       |                                 |                                     |

<sup>a</sup> Reaction conditions: **1a** (0.3 mmol) in solvent (15 mL) with  $\gamma$ -ray radiation (dose rate:  $110\text{ Gy min}^{-1}$ , measured using a Fricke dosimeter) at room temperature and under an air atmosphere for 15 h. <sup>b</sup> Determined by GC-MS using 1,3,5-trimethoxybenzene as the internal standard. EtOH = ethanol, *i*-PrOH = 2-propanol, Et<sub>2</sub>O = diethyl ether, DMA = *N,N*-dimethylacetamide, CHCl<sub>3</sub> = trichloromethane, CCl<sub>4</sub> = tetrachloromethane. n.d. = no detected.

**Table S2** Evaluation of the mixed solvent of CH<sub>3</sub>CN and water<sup>a</sup>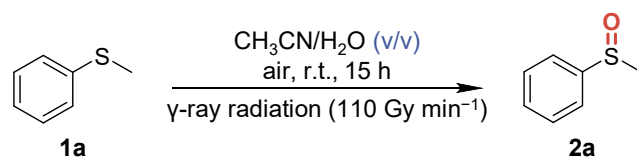

**1a**  $\xrightarrow[\text{air, r.t., 15 h}]{\text{CH}_3\text{CN}/\text{H}_2\text{O (v/v)}}$  **2a**  
 $\gamma\text{-ray radiation (110 Gy min}^{-1}\text{)}$

| Entry | Solvent                                   | Yield of <b>2a</b> (%) <sup>b</sup> |
|-------|-------------------------------------------|-------------------------------------|
| 1     | CH <sub>3</sub> CN                        | 95                                  |
| 2     | CH <sub>3</sub> CN/H <sub>2</sub> O (4/1) | 72                                  |
| 3     | CH <sub>3</sub> CN/H <sub>2</sub> O (3/2) | 43                                  |
| 4     | CH <sub>3</sub> CN/H <sub>2</sub> O (2/3) | 19                                  |
| 5     | CH <sub>3</sub> CN/H <sub>2</sub> O (1/4) | 16                                  |

<sup>a</sup> Reaction conditions: **1a** (0.3 mmol) in the mixed solvent of CH<sub>3</sub>CN and H<sub>2</sub>O (15 mL) with  $\gamma$ -ray radiation (dose rate: 110 Gy min<sup>-1</sup>, measured using a Fricke dosimeter) at room temperature and under an air atmosphere for 15 h. <sup>b</sup> Determined by GC-MS using 1,3,5-trimethoxybenzene as the internal standard.

**Table S3** Evaluation of the dose rate<sup>a</sup>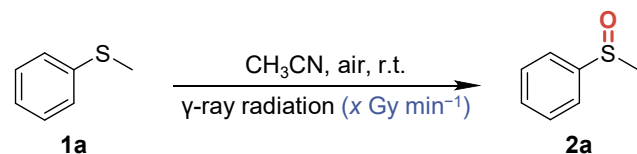

**1a**  $\xrightarrow[\text{air, r.t.}]{\text{CH}_3\text{CN}}$  **2a**  
 $\gamma\text{-ray radiation (x Gy min}^{-1}\text{)}$

| Entry | Dose rate (Gy min <sup>-1</sup> ) | Time (h) | Yield of <b>2a</b> (%) <sup>b</sup> |
|-------|-----------------------------------|----------|-------------------------------------|
| 1     | 110                               | 15       | 95                                  |
| 2     | 220                               | 7.5      | 94                                  |

<sup>a</sup> Reaction conditions: **1a** (0.3 mmol) in CH<sub>3</sub>CN (15 mL) with  $\gamma$ -ray radiation (dose rate was measured using a Fricke dosimeter, and the absorbed dose was 99 kGy) at room temperature and under an air atmosphere. <sup>b</sup> Determined by GC-MS using 1,3,5-trimethoxybenzene as the internal standard.

**Table S4** Evaluation of the reaction time<sup>a</sup>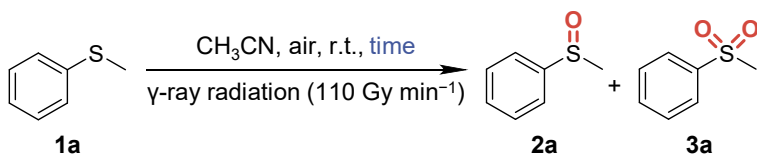

| Entry | Time (h) | Yield of <b>2a</b> (%) <sup>b</sup> | Yield of <b>3a</b> (%) <sup>b</sup> |
|-------|----------|-------------------------------------|-------------------------------------|
| 1     | 2        | 27                                  | n.d.                                |
| 2     | 4        | 45                                  | n.d.                                |
| 3     | 6        | 60                                  | n.d.                                |
| 4     | 8        | 74                                  | n.d.                                |
| 5     | 15       | 95                                  | n.d.                                |
| 6     | 18       | 75                                  | 13                                  |
| 7     | 21       | 69                                  | 18                                  |
| 8     | 63       | n.d.                                | 48                                  |

<sup>a</sup> Reaction conditions: **1a** (0.3 mmol) in CH<sub>3</sub>CN (15 mL) with  $\gamma$ -ray radiation (dose rate: 110 Gy min<sup>-1</sup>, measured using a Fricke dosimeter) at room temperature and under an air atmosphere for different reaction times. <sup>b</sup> Determined by GC-MS using 1,3,5-trimethoxybenzene as the internal standard. n.d. = no detected.

**Table S5** Transformation from **2a** to **3a**<sup>a</sup>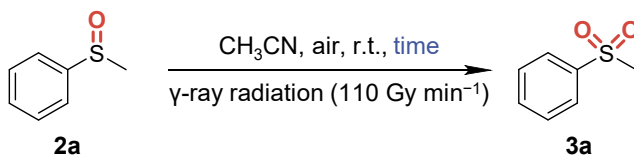

| Entry | Time (h) | Yield of <b>3a</b> (%) <sup>b</sup> |
|-------|----------|-------------------------------------|
| 1     | 2        | 7                                   |
| 2     | 4        | 13                                  |
| 3     | 6        | 19                                  |
| 4     | 15       | 30                                  |

<sup>a</sup> Reaction conditions: **2a** (0.3 mmol) in CH<sub>3</sub>CN (15 mL) with  $\gamma$ -ray radiation (dose rate: 110 Gy min<sup>-1</sup>, measured using a Fricke dosimeter) at room temperature and under an air atmosphere for different reaction times. <sup>b</sup> Determined by GC-MS using 1,3,5-trimethoxybenzene as the internal standard.

### 3. Substrate scope studies

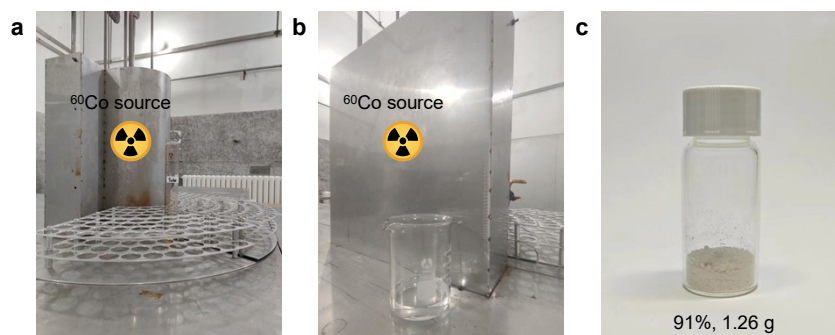

**Fig. S1** Photographs of the reaction setups for radiation-induced aerobic oxidation and the gram-scale synthetic product **5g**. (a) The reaction setup for general procedures A and B. (b) The reaction setup for gram-scale synthesis of **5g**. (c) The gram-scale synthetic product **5g**.

#### **General procedure A for the radiation-induced oxidation of sulfides:**

A 130 mL test tube was charged with 15 mL of acetonitrile containing 0.3 mmol **1**. Then the test tube was sealed and exposed to <sup>60</sup>Co  $\gamma$ -ray radiation (dose rate: 110 Gy min<sup>-1</sup>, measured using a Fricke dosimeter) at room temperature. Unless otherwise specified, the reaction time is 15 h. After the reaction, the solvent was removed on a rotary evaporator under reduced pressure, and the residue was purified by preparative thin-layer chromatography or preparative high performance liquid chromatography to afford the desired product **2**.

#### **General procedure B for the radiation-induced oxidation of phosphorus(III) compounds:**

A 130 mL test tube was charged with 15 mL of acetonitrile containing 0.3 mmol **4**. Then the test tube was sealed and exposed to <sup>60</sup>Co  $\gamma$ -ray radiation (dose rate: 110 Gy min<sup>-1</sup>, measured using a Fricke dosimeter) at room temperature. Unless otherwise specified, the reaction time is 3 h. After the reaction, the solvent was removed on a rotary evaporator under reduced pressure, and the residue was purified by preparative thin-layer chromatography to afford the desired product **5**.

#### **Procedure for gram-scale synthesis of triphenylphosphine oxide (**5g**):**

A 300 mL beaker was charged with 50 mL of acetonitrile containing **4g** (1.31 g, 5.0 mmol). Then the beaker was exposed to <sup>60</sup>Co  $\gamma$ -ray radiation (dose rate: 110 Gy min<sup>-1</sup>, measured using a Fricke dosimeter) at room temperature for 6.5 h. After the reaction, the solvent was removed on a rotary evaporator under reduced pressure, and the residue was purified by flash column chromatography on silica gel (petroleum ether/ethyl acetate = 1:1) to obtain **5g** as a white solid (1.26 g, 91% yield).

## Characterization data for the products:

### (methylsulfinyl)benzene (2a)

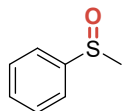

**2a** was prepared according to general procedure A using **1a** (37.3 mg, 0.3 mmol) and acetonitrile (15 mL). After steps of treatments as described, the mixture was purified by preparative thin-layer chromatography (hexane/ethyl acetate = 1:2,  $R_f$  = 0.39) to obtain **2a** as a colorless oil (38.3 mg, 91% yield).  $^1\text{H}$  NMR (400 MHz,  $\text{CDCl}_3$ )  $\delta$  7.66 – 7.62 (m, 2H), 7.55 – 7.48 (m, 3H), 2.71 (s, 3H).  $^{13}\text{C}$  NMR (101 MHz,  $\text{CDCl}_3$ )  $\delta$  145.83, 131.14, 129.46, 123.60, 44.08. HRMS (ESI): calculated for  $\text{C}_7\text{H}_8\text{OS}$   $[\text{M}+\text{H}]^+$ : 141.0369, found: 141.0369.

### 1-methyl-4-(methylsulfinyl)benzene (2b)

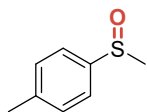

**2b** was prepared according to general procedure A using **1b** (41.4 mg, 0.3 mmol) and acetonitrile (15 mL). After steps of treatments as described, the mixture was purified by preparative thin-layer chromatography (hexane/ethyl acetate = 1:2,  $R_f$  = 0.49) to obtain **2b** as a colorless oil (37.2 mg, 80% yield).  $^1\text{H}$  NMR (400 MHz,  $\text{CDCl}_3$ )  $\delta$  7.55 – 7.52 (m, 2H), 7.32 (d,  $J$  = 7.9 Hz, 2H), 2.69 (s, 3H), 2.41 (s, 3H).  $^{13}\text{C}$  NMR (101 MHz,  $\text{CDCl}_3$ )  $\delta$  142.65, 141.62, 130.15, 123.66, 44.13, 21.51. HRMS (ESI): calculated for  $\text{C}_8\text{H}_{10}\text{OS}$   $[\text{M}+\text{H}]^+$ : 155.0525, found: 155.0521.

### 1-methoxy-4-(methylsulfinyl)benzene (2c)

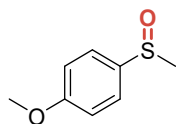

**2c** was prepared according to general procedure A using **1c** (46.3 mg, 0.3 mmol) and acetonitrile (15 mL). After steps of treatments as described, the mixture was purified by preparative thin-layer chromatography (hexane/ethyl acetate = 1:2,  $R_f$  = 0.24) to obtain **2c** as a white solid (32.8 mg, 64% yield).  $^1\text{H}$  NMR (400 MHz,  $\text{CDCl}_3$ )  $\delta$  7.60 – 7.56 (m, 2H), 7.04 – 6.99 (m, 2H), 3.84 (s, 3H), 2.68 (s, 3H).  $^{13}\text{C}$  NMR (101 MHz,  $\text{CDCl}_3$ )  $\delta$  162.07, 136.74, 125.55, 114.95, 55.63, 44.12. HRMS (ESI):

calculated for C<sub>8</sub>H<sub>10</sub>O<sub>2</sub>S [M+H]<sup>+</sup>: 171.0474, found: 171.0473.

### 1-(methylsulfinyl)-4-(trifluoromethoxy)benzene (2d)

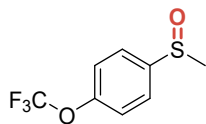

**2d** was prepared according to general procedure A using **1d** (62.5 mg, 0.3 mmol) and acetonitrile (15 mL). After steps of treatments as described, the mixture was purified by preparative thin-layer chromatography (hexane/ethyl acetate = 1:2, R<sub>f</sub> = 0.26) to obtain **2d** as a white solid (51.3 mg, 76% yield). <sup>1</sup>H NMR (400 MHz, CDCl<sub>3</sub>) δ 7.72 – 7.68 (m, 2H), 7.38 (d, *J* = 8.4 Hz, 2H), 2.74 (s, 3H). <sup>13</sup>C NMR (101 MHz, CDCl<sub>3</sub>) δ 151.24 (d, *J* = 1.6 Hz), 144.28, 125.56, 121.91, 120.45 (q, *J* = 259.9 Hz), 44.23. <sup>19</sup>F NMR (471 MHz, CDCl<sub>3</sub>) δ -57.83. HRMS (ESI): calculated for C<sub>8</sub>H<sub>7</sub>F<sub>3</sub>O<sub>2</sub>S [M+H]<sup>+</sup>: 225.0192, found: 225.0194.

### 1-fluoro-4-(methylsulfinyl)benzene (2e)

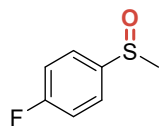

**2e** was prepared according to general procedure A using **1e** (42.6 mg, 0.3 mmol) and acetonitrile (15 mL). After steps of treatments as described, the mixture was purified by preparative thin-layer chromatography (hexane/ethyl acetate = 1:2, R<sub>f</sub> = 0.29) to obtain **2e** as a colorless oil (39.4 mg, 83% yield). <sup>1</sup>H NMR (400 MHz, CDCl<sub>3</sub>) δ 7.67 – 7.61 (m, 2H), 7.25 – 7.18 (m, 2H), 2.70 (s, 3H). <sup>13</sup>C NMR (101 MHz, CDCl<sub>3</sub>) δ 164.43 (d, *J* = 251.4 Hz), 141.31 (d, *J* = 3.2 Hz), 125.94 (d, *J* = 8.9 Hz), 116.80 (d, *J* = 22.7 Hz), 44.30. <sup>19</sup>F NMR (471 MHz, CDCl<sub>3</sub>) δ -108.67. HRMS (ESI): calculated for C<sub>7</sub>H<sub>7</sub>FOS [M+H]<sup>+</sup>: 159.0274, found: 159.0275.

### 1-chloro-4-(methylsulfinyl)benzene (2f)

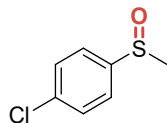

**2f** was prepared according to general procedure A using **1f** (47.6 mg, 0.3 mmol) and acetonitrile (15 mL). After steps of treatments as described, the mixture was purified by preparative high performance liquid chromatography [eluent A: 0.1% formic acid in water; eluent B: acetonitrile; flow rate: 30 mL



min<sup>-1</sup>; ramp from 5% B (at min 2) to 95% B (at min 14)] to obtain **2f** as a colorless oil (48.9 mg, 93% yield).  $R_f = 0.38$ , hexane/ethyl acetate = 1:2. <sup>1</sup>H NMR (400 MHz, CDCl<sub>3</sub>)  $\delta$  7.61 – 7.57 (m, 2H), 7.53 – 7.48 (m, 2H), 2.71 (s, 3H). <sup>13</sup>C NMR (101 MHz, CDCl<sub>3</sub>)  $\delta$  144.38, 137.38, 129.79, 125.09, 44.19. HRMS (ESI): calculated for C<sub>7</sub>H<sub>7</sub>ClOS [M+H]<sup>+</sup>: 174.9979, found: 174.9978.

### 1-bromo-4-(methylsulfinyl)benzene (**2g**)

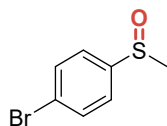

**2g** was prepared according to general procedure A using **1g** (60.9 mg, 0.3 mmol) and acetonitrile (15 mL). After steps of treatments as described, the mixture was purified by preparative high performance liquid chromatography [eluent A: 0.1% formic acid in water; eluent B: acetonitrile; flow rate: 30 mL min<sup>-1</sup>; ramp from 5% B (at min 2) to 95% B (at min 14)] to obtain **2g** as a white solid (46.1 mg, 70% yield).  $R_f = 0.36$ , hexane/ethyl acetate = 1:2. <sup>1</sup>H NMR (400 MHz, CDCl<sub>3</sub>)  $\delta$  7.69 – 7.65 (m, 2H), 7.54 – 7.50 (m, 2H), 2.71 (s, 3H). <sup>13</sup>C NMR (101 MHz, CDCl<sub>3</sub>)  $\delta$  145.04, 132.71, 125.60, 125.28, 44.15. HRMS (ESI): calculated for C<sub>7</sub>H<sub>7</sub>BrOS [M+H]<sup>+</sup>: 218.9474, found: 218.9475.

### 1-iodo-4-(methylsulfinyl)benzene (**2h**)

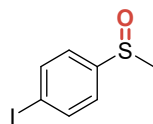

**2h** was prepared according to general procedure A using **1h** (75.0 mg, 0.3 mmol) and acetonitrile (15 mL). After steps of treatments as described, the mixture was purified by preparative high performance liquid chromatography [eluent A: 0.1% formic acid in water; eluent B: acetonitrile; flow rate: 30 mL min<sup>-1</sup>; ramp from 5% B (at min 2) to 95% B (at min 14)] to obtain **2h** as a white solid (33.0 mg, 41% yield).  $R_f = 0.26$ , hexane/ethyl acetate = 1:2. <sup>1</sup>H NMR (400 MHz, CDCl<sub>3</sub>)  $\delta$  7.90 – 7.86 (m, 2H), 7.41 – 7.36 (m, 2H), 2.71 (s, 3H). <sup>13</sup>C NMR (101 MHz, CDCl<sub>3</sub>)  $\delta$  145.87, 138.61, 125.28, 97.51, 44.12. HRMS (ESI): calculated for C<sub>7</sub>H<sub>7</sub>IOS [M+H]<sup>+</sup>: 266.9335, found: 266.9336.

### 1-fluoro-2-(methylsulfinyl)benzene (**2i**)

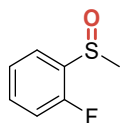

**2i** was prepared according to general procedure A using **1i** (42.6 mg, 0.3 mmol) and acetonitrile (15 mL). After steps of treatments as described, the mixture was purified by preparative thin-layer chromatography (hexane/ethyl acetate = 1:2,  $R_f = 0.50$ ) to obtain **2i** as a colorless oil (42.3 mg, 89% yield).  $^1\text{H}$  NMR (400 MHz,  $\text{CDCl}_3$ )  $\delta$  7.89 – 7.84 (m, 1H), 7.52 – 7.46 (m, 1H), 7.42 – 7.37 (m, 1H), 7.14 – 7.09 (m, 1H), 2.83 (s, 3H).  $^{13}\text{C}$  NMR (101 MHz,  $\text{CDCl}_3$ )  $\delta$  157.60 (d,  $J = 246.8$  Hz), 132.81 (d,  $J = 7.6$  Hz), 125.55 (dd,  $J = 4.4, 2.9$  Hz), 115.81 (d,  $J = 20.2$  Hz), 42.25 (d,  $J = 1.8$  Hz).  $^{19}\text{F}$  NMR (471 MHz,  $\text{CDCl}_3$ )  $\delta$  -114.77. HRMS (ESI): calculated for  $\text{C}_7\text{H}_7\text{FOS}$   $[\text{M}+\text{H}]^+$ : 159.0274, found: 159.0276.

### 1-chloro-2-(methylsulfinyl)benzene (**2j**)

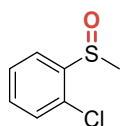

**2j** was prepared according to general procedure A using **1j** (47.6 mg, 0.3 mmol) and acetonitrile (15 mL). After steps of treatments as described, the mixture was purified by preparative thin-layer chromatography (petroleum ether/ethyl acetate = 1:2,  $R_f = 0.54$ ) to obtain **2j** as a colorless oil (49.1 mg, 94% yield).  $^1\text{H}$  NMR (400 MHz,  $\text{CDCl}_3$ )  $\delta$  7.96 – 7.93 (m, 1H), 7.56 – 7.51 (m, 1H), 7.47 – 7.42 (m, 1H), 7.40 – 7.37 (m, 1H), 2.83 (s, 3H).  $^{13}\text{C}$  NMR (101 MHz,  $\text{CDCl}_3$ )  $\delta$  143.44, 132.17, 129.92, 128.32, 125.45, 41.68. HRMS (ESI): calculated for  $\text{C}_7\text{H}_7\text{ClOS}$   $[\text{M}+\text{H}]^+$ : 174.9979, found: 174.9978.

### 1-bromo-2-(methylsulfinyl)benzene (**2k**)

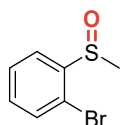

**2k** was prepared according to general procedure A using **1k** (60.9 mg, 0.3 mmol) and acetonitrile (15 mL). After steps of treatments as described, the mixture was purified by preparative thin-layer chromatography (hexane/ethyl acetate = 1:2,  $R_f = 0.49$ ) to obtain **2k** as a colorless oil (38.1 mg, 58% yield).  $^1\text{H}$  NMR (400 MHz,  $\text{CDCl}_3$ )  $\delta$  7.96 – 7.93 (m, 1H), 7.61 – 7.55 (m, 2H), 7.40 – 7.34 (m, 1H), 2.82 (s, 3H).  $^{13}\text{C}$  NMR (101 MHz,  $\text{CDCl}_3$ )  $\delta$  145.50, 133.05, 132.39, 128.87, 125.82, 118.55, 42.03. HRMS (ESI): calculated for  $\text{C}_7\text{H}_7\text{BrOS}$   $[\text{M}+\text{H}]^+$ : 218.9474, found: 218.9475.

### 1-chloro-3-(methylsulfinyl)benzene (**2l**)

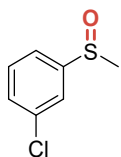

**2l** was prepared according to general procedure A using **1l** (47.6 mg, 0.3 mmol) and acetonitrile (15 mL). After steps of treatments as described, the mixture was purified by preparative thin-layer chromatography (petroleum ether/ethyl acetate = 1:2,  $R_f$  = 0.38) to obtain **2l** as a colorless oil (47.0 mg, 90% yield).  $^1\text{H}$  NMR (400 MHz,  $\text{CDCl}_3$ )  $\delta$  7.67 – 7.65 (m, 1H), 7.51 – 7.45 (m, 3H), 2.73 (s, 3H).  $^{13}\text{C}$  NMR (101 MHz,  $\text{CDCl}_3$ )  $\delta$  147.98, 135.84, 131.32, 130.72, 123.76, 121.73, 44.16. HRMS (ESI): calculated for  $\text{C}_7\text{H}_7\text{ClOS}$   $[\text{M}+\text{H}]^+$ : 174.9979, found: 174.9978.

### 1,3-dichloro-5-(methylsulfinyl)benzene (**2m**)

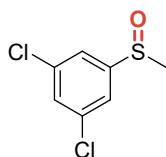

**2m** was prepared according to general procedure A using **1m** (57.6 mg, 0.3 mmol) and acetonitrile (15 mL). After steps of treatments as described, the mixture was purified by preparative thin-layer chromatography (hexane/ethyl acetate = 1:2,  $R_f$  = 0.43) to obtain **2m** as a white solid (59.1 mg, 95% yield).  $^1\text{H}$  NMR (400 MHz,  $\text{CDCl}_3$ )  $\delta$  7.51 (d,  $J$  = 1.8 Hz, 2H), 7.47 – 7.45 (m, 1H), 2.75 (s, 3H).  $^{13}\text{C}$  NMR (101 MHz,  $\text{CDCl}_3$ )  $\delta$  149.52, 136.46, 131.22, 122.07, 44.17. HRMS (ESI): calculated for  $\text{C}_7\text{H}_6\text{Cl}_2\text{OS}$   $[\text{M}+\text{H}]^+$ : 208.9589, found: 208.9588.

### 1-(methylsulfinyl)-4-nitrobenzene (**2n**)

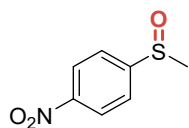

**2n** was prepared according to general procedure A using **1n** (50.8 mg, 0.3 mmol) and acetonitrile (15 mL). After steps of treatments as described, the mixture was purified by preparative thin-layer chromatography (hexane/ethyl acetate = 1:2,  $R_f$  = 0.16) to obtain **2n** as a yellow solid (45.6 mg, 82% yield).  $^1\text{H}$  NMR (400 MHz,  $\text{CDCl}_3$ )  $\delta$  8.40 – 8.36 (m, 2H), 7.85 – 7.81 (m, 2H), 2.79 (s, 3H).  $^{13}\text{C}$  NMR (101 MHz,  $\text{CDCl}_3$ )  $\delta$  153.30, 149.59, 124.77, 124.60, 43.96. HRMS (ESI): calculated for  $\text{C}_7\text{H}_7\text{NO}_3\text{S}$

[M+H]<sup>+</sup>: 186.0219, found: 186.0220.

#### 4-(methylsulfinyl)benzonitrile (**2o**)

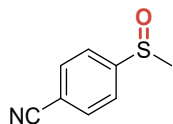

**2o** was prepared according to general procedure A using **1o** (44.7 mg, 0.3 mmol) and acetonitrile (15 mL). After steps of treatments as described, the mixture was purified by preparative thin-layer chromatography (hexane/ethyl acetate = 1:2,  $R_f$  = 0.41) to obtain **2o** as a white solid (40.1 mg, 81% yield). <sup>1</sup>H NMR (400 MHz, CDCl<sub>3</sub>) δ 7.85 – 7.81 (m, 2H), 7.78 – 7.74 (m, 2H), 2.76 (s, 3H). <sup>13</sup>C NMR (101 MHz, CDCl<sub>3</sub>) δ 151.61, 133.12, 124.43, 117.82, 114.95, 43.94. HRMS (ESI): calculated for C<sub>7</sub>H<sub>7</sub>NOS [M+H]<sup>+</sup>: 166.0321, found: 166.0319.

#### 4,4,5,5-tetramethyl-2-(4-(methylsulfinyl)phenyl)-1,3,2-dioxaborolane (**2p**)

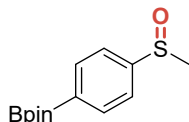

**2p** was prepared according to general procedure A using **1p** (75.0 mg, 0.3 mmol) and acetonitrile (15 mL). After steps of treatments as described, the mixture was purified by preparative thin-layer chromatography (hexane/ethyl acetate = 1:2,  $R_f$  = 0.30) to obtain **2p** as a white solid (51.7 mg, 65% yield). <sup>1</sup>H NMR (400 MHz, CDCl<sub>3</sub>) δ 7.97 – 7.94 (m, 2H), 7.64 – 7.62 (m, 2H), 2.71 (s, 3H), 1.35 (s, 12H). <sup>13</sup>C NMR (101 MHz, CDCl<sub>3</sub>) δ 148.86, 135.69, 122.67, 84.38, 44.06, 25.01, 25.00. HRMS (ESI): calculated for C<sub>13</sub>H<sub>19</sub>BO<sub>3</sub>S [M+H]<sup>+</sup>: 267.1221, found: 267.1224.

#### 1-(4-(methylsulfinyl)phenyl)ethan-1-one (**2q**)

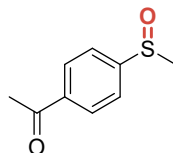

**2q** was prepared according to general procedure A using **1q** (49.9 mg, 0.3 mmol) and acetonitrile (15 mL). After steps of treatments as described, the mixture was purified by preparative thin-layer chromatography (hexane/ethyl acetate = 1:2,  $R_f$  = 0.25) to obtain **2q** as a white solid (41.9 mg, 77% yield). <sup>1</sup>H NMR (400 MHz, CDCl<sub>3</sub>) δ 8.11 – 8.07 (m, 2H), 7.75 – 7.71 (m, 2H), 2.75 (s, 3H), 2.64 (s,

3H).  $^{13}\text{C}$  NMR (101 MHz,  $\text{CDCl}_3$ )  $\delta$  197.14, 151.07, 139.20, 129.26, 123.86, 43.95, 26.92. HRMS (ESI): calculated for  $\text{C}_9\text{H}_{10}\text{O}_2\text{S}$   $[\text{M}+\text{H}]^+$ : 183.0474, found: 183.0473.

#### methyl 4-(methylsulfinyl)benzoate (**2r**)

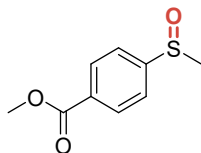

**2r** was prepared according to general procedure A using **1r** (54.7 mg, 0.3 mmol) and acetonitrile (15 mL). After steps of treatments as described, the mixture was purified by preparative thin-layer chromatography (hexane/ethyl acetate = 1:2,  $R_f$  = 0.24) to obtain **2r** as a white solid (15.8 mg, 27% yield).  $^1\text{H}$  NMR (400 MHz,  $\text{CDCl}_3$ )  $\delta$  8.20 – 8.17 (m, 2H), 7.73 – 7.70 (m, 2H), 3.94 (s, 3H), 2.75 (s, 3H).  $^{13}\text{C}$  NMR (101 MHz,  $\text{CDCl}_3$ )  $\delta$  166.14, 150.96, 132.73, 130.61, 123.63, 52.63, 43.97. HRMS (ESI): calculated for  $\text{C}_9\text{H}_{10}\text{O}_3\text{S}$   $[\text{M}+\text{H}]^+$ : 199.0423, found: 199.0424.

#### 1-(methylsulfinyl)-2-(trifluoromethyl)benzene (**2s**)

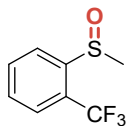

**2s** was prepared according to general procedure A using **1s** (57.7 mg, 0.3 mmol) and acetonitrile (15 mL). After steps of treatments as described, the mixture was purified by preparative thin-layer chromatography (hexane/ethyl acetate = 1:2,  $R_f$  = 0.64) to obtain **2s** as a yellow solid (52.0 mg, 83% yield).  $^1\text{H}$  NMR (400 MHz,  $\text{CDCl}_3$ )  $\delta$  8.32 (d,  $J$  = 7.9 Hz, 1H), 7.86 – 7.81 (m, 1H), 7.74 – 7.71 (m, 1H), 7.65 – 7.60 (m, 1H), 2.75 (s, 3H).  $^{13}\text{C}$  NMR (101 MHz,  $\text{CDCl}_3$ )  $\delta$  145.99, 133.58, 131.20, 126.45 (d,  $J$  = 5.2 Hz), 126.45 (d,  $J$  = 15.8 Hz), 125.80 (q,  $J$  = 723.9 Hz), 124.70, 44.62.  $^{19}\text{F}$  NMR (471 MHz,  $\text{CDCl}_3$ )  $\delta$  -57.41. HRMS (ESI): calculated for  $\text{C}_8\text{H}_7\text{F}_3\text{OS}$   $[\text{M}+\text{H}]^+$ : 209.0242, found: 209.0242.

#### 2-(methylsulfinyl)naphthalene (**2t**)

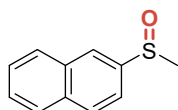

**2t** was prepared according to general procedure A using **1t** (52.2 mg, 0.3 mmol) and acetonitrile (15 mL). After steps of treatments as described, the mixture was purified by preparative thin-layer

chromatography (hexane/ethyl acetate = 1:2,  $R_f$  = 0.20) to obtain **2t** as a white solid (30.1 mg, 53% yield).  $^1\text{H}$  NMR (400 MHz,  $\text{CDCl}_3$ )  $\delta$  8.21 (d,  $J$  = 1.7 Hz, 1H), 7.98 (d,  $J$  = 8.6 Hz, 1H), 7.96 – 7.89 (m, 2H), 7.62 – 7.56 (m, 3H), 2.79 (s, 3H).  $^{13}\text{C}$  NMR (101 MHz,  $\text{CDCl}_3$ )  $\delta$  142.73, 134.56, 133.03, 129.76, 128.64, 128.18, 127.94, 127.50, 124.20, 119.54, 43.87. HRMS (ESI): calculated for  $\text{C}_{11}\text{H}_{10}\text{OS}$   $[\text{M}+\text{H}]^+$ : 191.0525, found: 191.0523.

### 2-(methylsulfinyl)thiophene (**2u**)

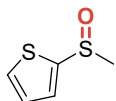

**2u** was prepared according to general procedure A using **1u** (39.0 mg, 0.3 mmol) and acetonitrile (15 mL). After steps of treatments as described, the mixture was purified by preparative thin-layer chromatography (hexane/ethyl acetate = 1:2,  $R_f$  = 0.32) to obtain **2u** as a yellow oil (34.5 mg, 79% yield).  $^1\text{H}$  NMR (400 MHz,  $\text{CDCl}_3$ )  $\delta$  7.65 (dd,  $J$  = 5.0, 1.2 Hz, 1H), 7.49 (dd,  $J$  = 3.7, 1.2 Hz, 1H), 7.12 (dd,  $J$  = 5.0, 3.7 Hz, 1H), 2.93 (s, 3H).  $^{13}\text{C}$  NMR (101 MHz,  $\text{CDCl}_3$ )  $\delta$  147.21, 131.09, 129.61, 127.59, 44.54. HRMS (ESI): calculated for  $\text{C}_5\text{H}_6\text{OS}_2$   $[\text{M}+\text{H}]^+$ : 146.9933, found: 146.9934.

### 3-(methylsulfinyl)thiophene (**2v**)

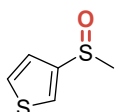

**2v** was prepared according to general procedure A using **1v** (39.0 mg, 0.3 mmol) and acetonitrile (15 mL). After steps of treatments as described, the mixture was purified by preparative thin-layer chromatography (hexane/ethyl acetate = 1:2,  $R_f$  = 0.21) to obtain **2v** as a yellow oil (37.0 mg, 85% yield).  $^1\text{H}$  NMR (400 MHz,  $\text{CDCl}_3$ )  $\delta$  7.77 (dd,  $J$  = 3.0, 1.3 Hz, 1H), 7.51 (dd,  $J$  = 5.1, 3.0 Hz, 1H), 7.28 (dd,  $J$  = 5.1, 1.3 Hz, 1H), 2.81 (s, 3H).  $^{13}\text{C}$  NMR (101 MHz,  $\text{CDCl}_3$ )  $\delta$  145.00, 128.75, 125.72, 122.85, 43.18. HRMS (ESI): calculated for  $\text{C}_5\text{H}_6\text{OS}_2$   $[\text{M}+\text{H}]^+$ : 146.9933, found: 146.9934.

### 2-(methylsulfinyl)pyridine (**2w**)

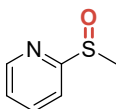

**2w** was prepared according to general procedure A using **1w** (37.5 mg, 0.3 mmol) and acetonitrile (15

mL). After steps of treatments as described, the mixture was purified by preparative thin-layer chromatography (hexane/ethyl acetate = 1:2,  $R_f = 0.36$ ) to obtain **2w** as a colorless oil (21.7 mg, 51% yield).  $^1\text{H}$  NMR (400 MHz,  $\text{CDCl}_3$ )  $\delta$  8.63 – 8.60 (m, 1H), 8.04 – 8.01 (m, 1H), 7.97 – 7.92 (m, 1H), 7.40 – 7.36 (m, 1H), 2.85 (s, 3H).  $^{13}\text{C}$  NMR (101 MHz,  $\text{CDCl}_3$ )  $\delta$  166.13, 149.65, 138.28, 124.72, 119.41, 41.45. HRMS (ESI): calculated for  $\text{C}_6\text{H}_7\text{NOS}$   $[\text{M}+\text{H}]^+$ : 142.0321, found: 142.0318.

### 5-(methylsulfinyl)pyrimidine (**2x**)

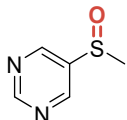

**2x** was prepared according to general procedure A using **1x** (37.8 mg, 0.3 mmol) and acetonitrile (15 mL). The reaction time is 30 h. After steps of treatments as described, the mixture was purified by preparative thin-layer chromatography (dichloromethane/methanol = 20:1,  $R_f = 0.34$ ) to obtain **2x** as a white solid (25.8 mg, 60% yield).  $^1\text{H}$  NMR (400 MHz,  $\text{CDCl}_3$ )  $\delta$  9.35 (s, 1H), 8.99 (s, 2H), 2.89 (s, 3H).  $^{13}\text{C}$  NMR (101 MHz,  $\text{CDCl}_3$ )  $\delta$  160.59, 153.27, 140.41, 43.77. HRMS (ESI): calculated for  $\text{C}_5\text{H}_6\text{N}_2\text{OS}$   $[\text{M}+\text{H}]^+$ : 143.0274, found: 143.0277.

### 2-(methylsulfinyl)thiazole (**2y**)

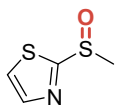

**2y** was prepared according to general procedure A using **1y** (39.4 mg, 0.3 mmol) and acetonitrile (15 mL). The reaction time is 30 h. After steps of treatments as described, the mixture was purified by preparative thin-layer chromatography (hexane/ethyl acetate = 1:2,  $R_f = 0.40$ ) to obtain **2y** as a yellow oil (16.8 mg, 38% yield).  $^1\text{H}$  NMR (400 MHz,  $\text{CDCl}_3$ )  $\delta$  7.96 (d,  $J = 3.1$  Hz, 1H), 7.67 (d,  $J = 3.1$  Hz, 1H), 3.02 (s, 3H).  $^{13}\text{C}$  NMR (101 MHz,  $\text{CDCl}_3$ )  $\delta$  176.31, 144.87, 123.89, 43.44. HRMS (ESI): calculated for  $\text{C}_4\text{H}_5\text{NOS}_2$   $[\text{M}+\text{H}]^+$ : 147.9885, found: 147.9888.

### 2-(methylsulfinyl)benzo[d]thiazole (**2z**)

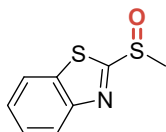

**2z** was prepared according to general procedure A using **1z** (54.4 mg, 0.3 mmol) and acetonitrile (15

mL). The reaction time is 30 h. After steps of treatments as described, the mixture was purified by preparative thin-layer chromatography (hexane/ethyl acetate = 1:2,  $R_f$  = 0.58) to obtain **2z** as a white solid (23.6 mg, 40% yield).  $^1\text{H}$  NMR (400 MHz,  $\text{CDCl}_3$ )  $\delta$  8.08 – 8.05 (m, 1H), 8.02 – 7.99 (m, 1H), 7.60 – 7.54 (m, 1H), 7.52 – 7.47 (m, 1H), 3.08 (s, 3H).  $^{13}\text{C}$  NMR (101 MHz,  $\text{CDCl}_3$ )  $\delta$  178.55, 153.92, 136.14, 127.13, 126.42, 124.12, 122.48, 43.32. HRMS (ESI): calculated for  $\text{C}_8\text{H}_7\text{NOS}_2$   $[\text{M}+\text{H}]^+$ : 198.0042, found: 198.0044.

#### (ethylsulfinyl)benzene (**2aa**)

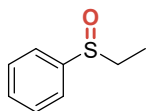

**2aa** was prepared according to general procedure A using **1aa** (41.4 mg, 0.3 mmol) and acetonitrile (15 mL). After steps of treatments as described, the mixture was purified by preparative thin-layer chromatography (hexane/ethyl acetate = 1:2,  $R_f$  = 0.38) to obtain **2aa** as a yellow solid (31.9 mg, 69% yield).  $^1\text{H}$  NMR (400 MHz,  $\text{CDCl}_3$ )  $\delta$  7.62 – 7.59 (m, 2H), 7.55 – 7.46 (m, 3H), 2.95 – 2.85 (m, 1H), 2.81 – 2.72 (m, 1H), 1.20 (t,  $J$  = 7.4 Hz, 3H).  $^{13}\text{C}$  NMR (101 MHz,  $\text{CDCl}_3$ )  $\delta$  143.51, 131.05, 129.27, 124.32, 50.47, 6.11. HRMS (ESI): calculated for  $\text{C}_8\text{H}_{10}\text{OS}$   $[\text{M}+\text{H}]^+$ : 155.0525, found: 155.0525.

#### (butylsulfinyl)benzene (**2ab**)

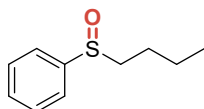

**2ab** was prepared according to general procedure A using **1ab** (46.9 mg, 0.3 mmol) and acetonitrile (15 mL). After steps of treatments as described, the mixture was purified by preparative thin-layer chromatography (hexane/ethyl acetate = 1:2,  $R_f$  = 0.56) to obtain **2ab** as a colorless oil (20.9 mg, 38% yield).  $^1\text{H}$  NMR (400 MHz,  $\text{CDCl}_3$ )  $\delta$  7.63 – 7.59 (m, 2H), 7.56 – 7.46 (m, 3H), 2.84 – 2.73 (m, 2H), 1.77 – 1.67 (m, 1H), 1.63 – 1.53 (m, 1H), 1.52 – 1.35 (m, 2H), 0.91 (t,  $J$  = 7.3 Hz, 3H).  $^{13}\text{C}$  NMR (101 MHz,  $\text{CDCl}_3$ )  $\delta$  144.17, 131.04, 129.32, 124.16, 57.21, 24.27, 22.03, 13.78. HRMS (ESI): calculated for  $\text{C}_{10}\text{H}_{14}\text{OS}$   $[\text{M}+\text{H}]^+$ : 183.0838, found: 183.0838.

#### (cyclopropylsulfinyl)benzene (**2ac**)

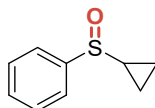



**2ac** was prepared according to general procedure A using **1ac** (45.1 mg, 0.3 mmol) and acetonitrile (15 mL). After steps of treatments as described, the mixture was purified by preparative thin-layer chromatography (hexane/ethyl acetate = 1:2,  $R_f = 0.46$ ) to obtain **2ac** as a yellow solid (38.3 mg, 77% yield).  $^1\text{H}$  NMR (400 MHz,  $\text{CDCl}_3$ )  $\delta$  7.68 – 7.64 (m, 2H), 7.54 – 7.46 (m, 3H), 2.29 – 2.22 (m, 1H), 1.27 – 1.20 (m, 1H), 1.07 – 1.00 (m, 1H), 0.99 – 0.89 (m, 2H).  $^{13}\text{C}$  NMR (101 MHz,  $\text{CDCl}_3$ )  $\delta$  145.03, 131.05, 129.29, 124.15, 33.95, 3.55, 2.94. HRMS (ESI): calculated for  $\text{C}_9\text{H}_{10}\text{OS}$   $[\text{M}+\text{H}]^+$ : 167.0525, found: 167.0525.

#### (2-chloroethyl)sulfinylbenzene (**2ad**)

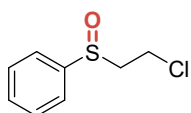

**2ad** was prepared according to general procedure A using **1ad** (51.8 mg, 0.3 mmol) and acetonitrile (15 mL). After steps of treatments as described, the mixture was purified by preparative thin-layer chromatography (hexane/ethyl acetate = 1:2,  $R_f = 0.59$ ) to obtain **2ad** as a colorless oil (35.4 mg, 63% yield).  $^1\text{H}$  NMR (400 MHz,  $\text{CDCl}_3$ )  $\delta$  7.66 – 7.62 (m, 2H), 7.58 – 7.52 (m, 3H), 4.01 – 3.93 (m, 1H), 3.69 – 3.62 (m, 1H), 3.19 – 3.14 (m, 2H).  $^{13}\text{C}$  NMR (101 MHz,  $\text{CDCl}_3$ )  $\delta$  142.94, 131.56, 129.64, 124.03, 59.51, 36.80. HRMS (ESI): calculated for  $\text{C}_8\text{H}_9\text{ClOS}$   $[\text{M}+\text{H}]^+$ : 189.0135, found: 189.0141.

#### methyl 2-(phenylsulfinyl)acetate (**2ae**)

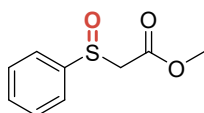

**2ae** was prepared according to general procedure A using **1ae** (54.7 mg, 0.3 mmol) and acetonitrile (15 mL). After steps of treatments as described, the mixture was purified by preparative thin-layer chromatography (hexane/ethyl acetate = 1:2,  $R_f = 0.50$ ) to obtain **2ae** as a white solid (47.7 mg, 80% yield).  $^1\text{H}$  NMR (400 MHz,  $\text{CDCl}_3$ )  $\delta$  7.71 – 7.67 (m, 2H), 7.56 – 7.53 (m, 3H), 3.85 (d,  $J = 13.7$  Hz, 1H), 3.71 (s, 3H), 3.67 (d,  $J = 13.7$  Hz, 1H).  $^{13}\text{C}$  NMR (101 MHz,  $\text{CDCl}_3$ )  $\delta$  165.33, 143.23, 131.97, 129.59, 124.25, 61.76, 52.92. HRMS (ESI): calculated for  $\text{C}_9\text{H}_{10}\text{O}_3\text{S}$   $[\text{M}+\text{H}]^+$ : 199.0423, found: 199.0424.

### dibenzo[b,e]thiepin-11(6H)-one 5-oxide (2af)

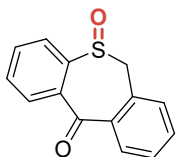

**2af** was prepared according to general procedure A using **1af** (67.9 mg, 0.3 mmol) and acetonitrile (15 mL). After steps of treatments as described, the mixture was purified by preparative thin-layer chromatography (hexane/ethyl acetate = 1:2,  $R_f = 0.52$ ) to obtain **2af** as a white solid (59.3 mg, 82% yield).  $^1\text{H}$  NMR (400 MHz,  $\text{CDCl}_3$ )  $\delta$  8.19 – 8.14 (m, 2H), 8.01 (d,  $J = 7.8$  Hz, 1H), 7.79 – 7.74 (m, 1H), 7.64 – 7.58 (m, 2H), 7.51 – 7.47 (m, 1H), 7.39 (d,  $J = 7.6$  Hz, 1H), 4.84 (d,  $J = 13.5$  Hz, 1H), 4.28 (d,  $J = 13.6$  Hz, 1H).  $^{13}\text{C}$  NMR (101 MHz,  $\text{CDCl}_3$ )  $\delta$  190.44, 146.95, 138.12, 134.26, 134.03, 133.50, 132.65, 132.06, 131.47, 130.90, 129.20, 128.01, 124.38, 61.11. HRMS (ESI): calculated for  $\text{C}_{14}\text{H}_{10}\text{O}_2\text{S}$   $[\text{M}+\text{H}]^+$ : 243.0474, found: 243.0475.

### sulfinyldibenzene (2ag)

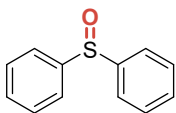

**2ag** was prepared according to general procedure A using **1ag** (55.8 mg, 0.3 mmol) and acetonitrile (15 mL). The reaction time is 30 h. After steps of treatments as described, the mixture was purified by preparative thin-layer chromatography (hexane/ethyl acetate = 1:2,  $R_f = 0.75$ ) to obtain **2ag** as a white solid (40.3 mg, 66% yield).  $^1\text{H}$  NMR (400 MHz,  $\text{CDCl}_3$ )  $\delta$  7.66 – 7.63 (m, 4H), 7.49 – 7.40 (m, 6H).  $^{13}\text{C}$  NMR (101 MHz,  $\text{CDCl}_3$ )  $\delta$  145.74, 131.17, 129.44, 124.90. HRMS (ESI): calculated for  $\text{C}_{12}\text{H}_{10}\text{OS}$   $[\text{M}+\text{H}]^+$ : 203.0525, found: 203.0523.

### 1-methyl-4-(phenylsulfinyl)benzene (2ah)

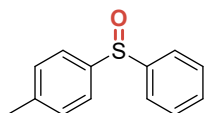

**2ah** was prepared according to general procedure A using **1ah** (60.1 mg, 0.3 mmol) and acetonitrile (15 mL). The reaction time is 30 h. After steps of treatments as described, the mixture was purified by preparative thin-layer chromatography (hexane/ethyl acetate = 1:1,  $R_f = 0.72$ ) to obtain **2ah** as a white solid (45.3 mg, 70% yield).  $^1\text{H}$  NMR (400 MHz,  $\text{CDCl}_3$ )  $\delta$  7.65 – 7.61 (m, 2H), 7.53 (d,  $J = 8.0$  Hz,

2H), 7.48 – 7.41 (m, 3H), 7.25 (d,  $J = 8.0$  Hz, 2H), 2.36 (s, 3H).  $^{13}\text{C}$  NMR (101 MHz,  $\text{CDCl}_3$ )  $\delta$  145.90, 142.57, 141.74, 130.98, 130.13, 129.36, 125.09, 124.78, 21.50. HRMS (ESI): calculated for  $\text{C}_{13}\text{H}_{12}\text{OS}$   $[\text{M}+\text{H}]^+$ : 217.0682, found: 217.0684.

### 1-(tert-butyl)-4-(phenylsulfinyl)benzene (2ai)

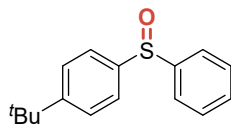

**2ai** was prepared according to general procedure A using **1ai** (72.7 mg, 0.3 mmol) and acetonitrile (15 mL). The reaction time is 30 h. After steps of treatments as described, the mixture was purified by preparative thin-layer chromatography (hexane/ethyl acetate = 1:1,  $R_f = 0.80$ ) to obtain **2ai** as a white solid (53.5 mg, 69% yield).  $^1\text{H}$  NMR (400 MHz,  $\text{CDCl}_3$ )  $\delta$  7.66 – 7.63 (m, 2H), 7.58 – 7.54 (m, 2H), 7.48 – 7.40 (m, 5H), 1.29 (s, 9H).  $^{13}\text{C}$  NMR (101 MHz,  $\text{CDCl}_3$ )  $\delta$  154.80, 145.72, 142.39, 130.97, 129.34, 126.50, 124.93, 124.84, 35.04, 31.24. HRMS (ESI): calculated for  $\text{C}_{16}\text{H}_{18}\text{OS}$   $[\text{M}+\text{H}]^+$ : 259.1151, found: 259.1151.

### thianthrene 5-oxide (2aj)

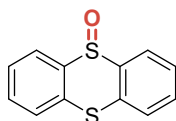

**2aj** was prepared according to general procedure A using **1aj** (64.9 mg, 0.3 mmol) and acetonitrile (15 mL). The reaction time is 30 h. After steps of treatments as described, the mixture was purified by preparative thin-layer chromatography (hexane/ethyl acetate = 4:1,  $R_f = 0.42$ ) to obtain **2aj** as a white solid (44.2 mg, 63% yield).  $^1\text{H}$  NMR (400 MHz,  $\text{CDCl}_3$ )  $\delta$  7.95 – 7.92 (m, 2H), 7.64 – 7.61 (m, 2H), 7.58 – 7.53 (m, 2H), 7.45 – 7.40 (m, 2H).  $^{13}\text{C}$  NMR (101 MHz,  $\text{CDCl}_3$ )  $\delta$  141.56, 129.98, 129.15, 128.56, 124.62. HRMS (ESI): calculated for  $\text{C}_{12}\text{H}_8\text{OS}_2$   $[\text{M}+\text{H}]^+$ : 233.0089, found: 233.0089.

### phenoxathiine 10-oxide (2ak)

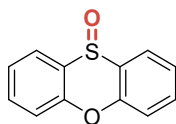

**2ak** was prepared according to general procedure A using **1ak** (60.1 mg, 0.3 mmol) and acetonitrile (15 mL). The reaction time is 30 h. After steps of treatments as described, the mixture was purified by

preparative thin-layer chromatography (hexane/ethyl acetate = 1:2,  $R_f$  = 0.51) to obtain **2ak** as a white solid (47.6 mg, 73% yield).  $^1\text{H}$  NMR (400 MHz,  $\text{CDCl}_3$ )  $\delta$  7.95 – 7.92 (m, 2H), 7.65 – 7.60 (m, 2H), 7.45 – 7.36 (m, 4H).  $^{13}\text{C}$  NMR (101 MHz,  $\text{CDCl}_3$ )  $\delta$  149.64, 133.90, 131.19, 124.98, 123.84, 118.94. HRMS (ESI): calculated for  $\text{C}_{12}\text{H}_8\text{O}_2\text{S}$   $[\text{M}+\text{H}]^+$ : 217.0318, found: 217.0319.

### 1-(butylsulfinyl)butane (**2al**)

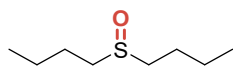

**2al** was prepared according to general procedure A using **1al** (43.8 mg, 0.3 mmol) and acetonitrile (15 mL). The reaction time is 7 h. After steps of treatments as described, the mixture was purified by preparative thin-layer chromatography (6% methanol in dichloromethane,  $R_f$  = 0.60) to obtain **2al** as a yellow oil (43.6 mg, 90% yield).  $^1\text{H}$  NMR (400 MHz,  $\text{CDCl}_3$ )  $\delta$  2.77 – 2.60 (m, 4H), 1.79 – 1.70 (m, 4H), 1.56 – 1.40 (m, 4H), 0.96 (t,  $J$  = 7.3 Hz, 6H).  $^{13}\text{C}$  NMR (101 MHz,  $\text{CDCl}_3$ )  $\delta$  51.99, 24.72, 22.17, 13.79. HRMS (ESI): calculated for  $\text{C}_8\text{H}_{18}\text{OS}$   $[\text{M}+\text{H}]^+$ : 163.1151, found: 163.1146.

### tetrahydrothiophene 1-oxide (**2am**)

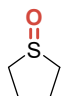

**2am** was prepared according to general procedure A using **1am** (26.4 mg, 0.3 mmol) and acetonitrile (15 mL). The reaction time is 7 h. After steps of treatments as described, the mixture was purified by preparative thin-layer chromatography (6% methanol in dichloromethane,  $R_f$  = 0.48) to obtain **2am** as a colorless oil (28.4 mg, 91% yield).  $^1\text{H}$  NMR (400 MHz,  $\text{CDCl}_3$ )  $\delta$  2.92 – 2.77 (m, 4H), 2.48 – 2.39 (m, 2H), 2.04 – 1.96 (m, 2H).  $^{13}\text{C}$  NMR (101 MHz,  $\text{CDCl}_3$ )  $\delta$  54.60, 25.60. HRMS (ESI): calculated for  $\text{C}_4\text{H}_8\text{OS}$   $[\text{M}+\text{H}]^+$ : 105.0369, found: 105.0364.

### 1-isothiocyanato-4-(methylsulfinyl)butane (**2an**)

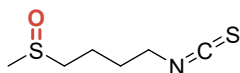

**2an** was prepared according to general procedure A using **1an** (48.4 mg, 0.3 mmol) and acetonitrile (15 mL). After steps of treatments as described, the mixture was purified by preparative thin-layer chromatography (6% methanol in dichloromethane,  $R_f$  = 0.50) to obtain **2an** as a white solid (37.5 mg, 71% yield).  $^1\text{H}$  NMR (400 MHz,  $\text{CDCl}_3$ )  $\delta$  3.57 (t,  $J$  = 5.9 Hz, 2H), 2.75 – 2.65 (m, 2H), 2.57 (s, 3H),

1.95 – 1.82 (m, 4H).  $^{13}\text{C}$  NMR (101 MHz,  $\text{CDCl}_3$ )  $\delta$  130.94, 53.53, 44.70, 38.79, 29.04, 20.14. HRMS (ESI): calculated for  $\text{C}_6\text{H}_{11}\text{NOS}_2$   $[\text{M}+\text{H}]^+$ : 178.0355, found: 178.0358.

### 5-chloro-5'-methyl-3-(4-(methylsulfinyl)phenyl)-2,2'-bipyridine (2a0)

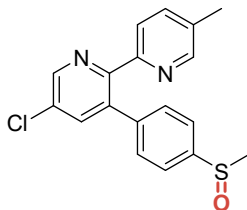

**2a0** was prepared according to general procedure A using **1a0** (98.0 mg, 0.3 mmol) and acetonitrile (15 mL). After steps of treatments as described, the mixture was purified by preparative thin-layer chromatography (dichloromethane/methanol = 20:1,  $R_f$  = 0.26) to obtain **2a0** as a white solid (53.6 mg, 52% yield).  $^1\text{H}$  NMR (400 MHz,  $\text{CDCl}_3$ )  $\delta$  8.69 (d,  $J$  = 2.4 Hz, 1H), 8.41 – 8.39 (m, 1H), 7.74 (d,  $J$  = 2.4 Hz, 1H), 7.62 – 7.58 (m, 2H), 7.55 (dd,  $J$  = 8.1, 2.4 Hz, 1H), 7.37 – 7.33 (m, 2H), 7.07 (d,  $J$  = 8.0 Hz, 1H), 2.75 (s, 3H), 2.53 (s, 3H).  $^{13}\text{C}$  NMR (101 MHz,  $\text{CDCl}_3$ )  $\delta$  158.40, 152.49, 149.94, 148.18, 145.96, 141.10, 138.13, 137.49, 136.06, 131.65, 131.18, 130.48, 124.24, 122.83, 44.03, 24.35. HRMS (ESI): calculated for  $\text{C}_{18}\text{H}_{15}\text{ClN}_2\text{OS}$   $[\text{M}+\text{H}]^+$ : 343.0666, found: 343.0666.

### dimethyl(phenyl)phosphine oxide (5a)

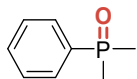

**5a** was prepared according to general procedure B using **4a** (41.4 mg, 0.3 mmol) and acetonitrile (15 mL). The reaction time is 100 min. After steps of treatments as described, the mixture was purified by preparative thin-layer chromatography (dichloromethane/methanol = 20:1,  $R_f$  = 0.26) to obtain **5a** as a white solid (42.9 mg, 93% yield).  $^1\text{H}$  NMR (400 MHz,  $\text{CDCl}_3$ )  $\delta$  7.75 – 7.68 (m, 2H), 7.53 – 7.43 (m, 3H), 1.72 (d,  $J$  = 13.0 Hz, 6H).  $^{13}\text{C}$  NMR (101 MHz,  $\text{CDCl}_3$ )  $\delta$  134.55 (d,  $J$  = 99.2 Hz), 131.80 (d,  $J$  = 2.8 Hz), 129.69 (d,  $J$  = 9.7 Hz), 128.79 (d,  $J$  = 11.7 Hz), 18.07 (d,  $J$  = 71.4 Hz).  $^{31}\text{P}$  NMR (202 MHz,  $\text{CDCl}_3$ )  $\delta$  34.74. HRMS (ESI): calculated for  $\text{C}_8\text{H}_{11}\text{OP}$   $[\text{M}+\text{H}]^+$ : 155.0620, found: 155.0621.

### methyldiphenylphosphine oxide (5b)

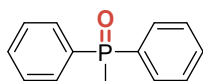

**5b** was prepared according to general procedure B using **4b** (60.1 mg, 0.3 mmol) and acetonitrile (15

mL). The reaction time is 100 min. After steps of treatments as described, the mixture was purified by preparative thin-layer chromatography (dichloromethane/methanol = 20:1,  $R_f$  = 0.31) to obtain **5b** as a white solid (61.6 mg, 95% yield).  $^1\text{H}$  NMR (400 MHz,  $\text{CDCl}_3$ )  $\delta$  7.75 – 7.68 (m, 4H), 7.54 – 7.42 (m, 6H), 2.01 (d,  $J$  = 13.2 Hz, 3H).  $^{13}\text{C}$  NMR (101 MHz,  $\text{CDCl}_3$ )  $\delta$  134.17 (d,  $J$  = 101.2 Hz), 131.85 (d,  $J$  = 2.7 Hz), 130.62 (d,  $J$  = 9.8 Hz), 128.75 (d,  $J$  = 11.8 Hz), 16.69 (d,  $J$  = 73.7 Hz).  $^{31}\text{P}$  NMR (202 MHz,  $\text{CDCl}_3$ )  $\delta$  29.85. HRMS (ESI): calculated for  $\text{C}_{13}\text{H}_{13}\text{OP}$   $[\text{M}+\text{H}]^+$ : 217.0777, found: 217.0779.

### ethyldiphenylphosphine oxide (**5c**)

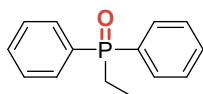

**5c** was prepared according to general procedure B using **4c** (64.3 mg, 0.3 mmol) and acetonitrile (15 mL). The reaction time is 100 min. After steps of treatments as described, the mixture was purified by preparative thin-layer chromatography (dichloromethane/methanol = 20:1,  $R_f$  = 0.32) to obtain **5c** as a white solid (65.4 mg, 95% yield).  $^1\text{H}$  NMR (400 MHz,  $\text{CDCl}_3$ )  $\delta$  7.77 – 7.70 (m, 4H), 7.53 – 7.43 (m, 6H), 2.32 – 2.23 (m, 2H), 1.24 – 1.15 (m, 3H).  $^{13}\text{C}$  NMR (101 MHz,  $\text{CDCl}_3$ )  $\delta$  132.93 (d,  $J$  = 97.7 Hz), 131.79 (d,  $J$  = 2.7 Hz), 130.99 (d,  $J$  = 9.2 Hz), 128.74 (d,  $J$  = 11.5 Hz), 22.78 (d,  $J$  = 72.9 Hz), 5.72 (d,  $J$  = 5.1 Hz).  $^{31}\text{P}$  NMR (202 MHz,  $\text{CDCl}_3$ )  $\delta$  34.09. HRMS (ESI): calculated for  $\text{C}_{14}\text{H}_{15}\text{OP}$   $[\text{M}+\text{H}]^+$ : 231.0933, found: 231.0937.

### diphenyl(propyl)phosphine oxide (**5d**)

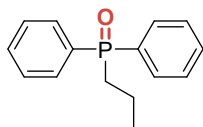

**5d** was prepared according to general procedure B using **4d** (68.5 mg, 0.3 mmol) and acetonitrile (15 mL). The reaction time is 220 min. After steps of treatments as described, the mixture was purified by preparative thin-layer chromatography (dichloromethane/methanol = 20:1,  $R_f$  = 0.33) to obtain **5d** as a white solid (66.1 mg, 90% yield).  $^1\text{H}$  NMR (400 MHz,  $\text{CDCl}_3$ )  $\delta$  7.75 – 7.68 (m, 4H), 7.51 – 7.40 (m, 6H), 2.28 – 2.20 (m, 2H), 1.70 – 1.57 (m, 2H), 1.02 – 0.97 (m, 3H).  $^{13}\text{C}$  NMR (101 MHz,  $\text{CDCl}_3$ )  $\delta$  133.16 (d,  $J$  = 98.9 Hz), 131.73 (d,  $J$  = 2.8 Hz), 130.86 (d,  $J$  = 9.3 Hz), 128.68 (d,  $J$  = 11.6 Hz), 31.87 (d,  $J$  = 72.0 Hz), 15.75 (d,  $J$  = 15.6 Hz), 15.34 (d,  $J$  = 3.9 Hz).  $^{31}\text{P}$  NMR (202 MHz,  $\text{CDCl}_3$ )  $\delta$  32.19. HRMS (ESI): calculated for  $\text{C}_{15}\text{H}_{17}\text{OP}$   $[\text{M}+\text{H}]^+$ : 245.1090, found: 245.1094.

### allyldiphenylphosphine oxide (**5e**)

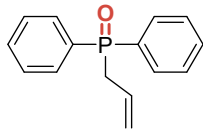

**5e** was prepared according to general procedure B using **4e** (67.9 mg, 0.3 mmol) and acetonitrile (15 mL). After steps of treatments as described, the mixture was purified by preparative thin-layer chromatography (dichloromethane/methanol = 20:1,  $R_f$  = 0.38) to obtain **5e** as a white solid (64.2 mg, 88% yield).  $^1\text{H}$  NMR (400 MHz,  $\text{CDCl}_3$ )  $\delta$  7.77 – 7.70 (m, 4H), 7.54 – 7.43 (m, 6H), 5.87 – 5.74 (m, 1H), 5.18 – 5.10 (m, 2H), 3.18 – 3.11 (m, 2H).  $^{13}\text{C}$  NMR (101 MHz,  $\text{CDCl}_3$ )  $\delta$  132.55 (d,  $J$  = 99.1 Hz), 131.95 (d,  $J$  = 2.8 Hz), 131.14 (d,  $J$  = 9.2 Hz), 128.69 (d,  $J$  = 11.7 Hz), 127.13 (d,  $J$  = 9.1 Hz), 121.14 (d,  $J$  = 11.7 Hz), 36.24 (d,  $J$  = 68.8 Hz).  $^{31}\text{P}$  NMR (202 MHz,  $\text{CDCl}_3$ )  $\delta$  29.66. HRMS (ESI): calculated for  $\text{C}_{15}\text{H}_{15}\text{OP}$   $[\text{M}+\text{H}]^+$ : 243.0933, found: 243.0934.

### cyclohexyldiphenylphosphine oxide (**5f**)

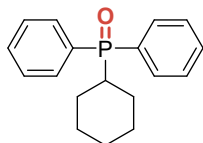

**5f** was prepared according to general procedure B using **4f** (80.5 mg, 0.3 mmol) and acetonitrile (15 mL). The reaction time is 100 min. After steps of treatments as described, the mixture was purified by preparative thin-layer chromatography (dichloromethane/methanol = 20:1,  $R_f$  = 0.39) to obtain **5f** as a white solid (78.7 mg, 92% yield).  $^1\text{H}$  NMR (400 MHz,  $\text{CDCl}_3$ )  $\delta$  7.80 – 7.74 (m, 4H), 7.51 – 7.42 (m, 6H), 2.28 – 2.18 (m, 1H), 1.84 – 1.69 (m, 5H), 1.59 – 1.47 (m, 2H), 1.32 – 1.19 (m, 3H).  $^{13}\text{C}$  NMR (101 MHz,  $\text{CDCl}_3$ )  $\delta$  132.26 (d,  $J$  = 94.4 Hz), 131.52 (d,  $J$  = 2.8 Hz), 131.21 (d,  $J$  = 8.7 Hz), 128.64 (d,  $J$  = 11.1 Hz), 37.33 (d,  $J$  = 73.1 Hz), 26.49 (d,  $J$  = 13.4 Hz), 25.89 (d,  $J$  = 1.5 Hz), 24.91 (d,  $J$  = 3.0 Hz).  $^{31}\text{P}$  NMR (202 MHz,  $\text{CDCl}_3$ )  $\delta$  34.19. HRMS (ESI): calculated for  $\text{C}_{18}\text{H}_{21}\text{OP}$   $[\text{M}+\text{H}]^+$ : 285.1403, found: 285.1403.

### triphenylphosphine oxide (**5g**)

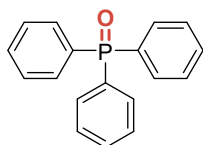

**5g** was prepared according to general procedure B using **4g** (78.7 mg, 0.3 mmol) and acetonitrile (15 mL). The reaction time is 100 min. After steps of treatments as described, the mixture was purified by preparative thin-layer chromatography (hexane/ethyl acetate = 1:2,  $R_f = 0.22$ ) to obtain **5g** as a white solid (80.3 mg, 96% yield).  $^1\text{H}$  NMR (400 MHz,  $\text{CDCl}_3$ )  $\delta$  7.70 – 7.63 (m, 6H), 7.57 – 7.51 (m, 3H), 7.48 – 7.42 (m, 6H).  $^{13}\text{C}$  NMR (101 MHz,  $\text{CDCl}_3$ )  $\delta$  132.66 (d,  $J = 104.5$  Hz), 132.22 (d,  $J = 9.9$  Hz), 132.05 (d,  $J = 2.8$  Hz), 128.61 (d,  $J = 12.1$  Hz).  $^{31}\text{P}$  NMR (202 MHz,  $\text{CDCl}_3$ )  $\delta$  29.00. HRMS (ESI): calculated for  $\text{C}_{18}\text{H}_{15}\text{OP}$   $[\text{M}+\text{H}]^+$ : 279.0933, found: 279.0939.

#### diphenyl(*p*-tolyl)phosphine oxide (**5h**)

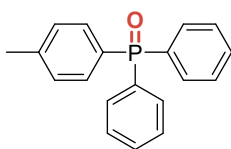

**5h** was prepared according to general procedure B using **4h** (82.9 mg, 0.3 mmol) and acetonitrile (15 mL). After steps of treatments as described, the mixture was purified by preparative thin-layer chromatography (dichloromethane/methanol = 20:1,  $R_f = 0.53$ ) to obtain **5h** as a white solid (80.8 mg, 92% yield).  $^1\text{H}$  NMR (400 MHz,  $\text{CDCl}_3$ )  $\delta$  7.70 – 7.63 (m, 4H), 7.58 – 7.50 (m, 4H), 7.47 – 7.42 (m, 4H), 7.28 – 7.25 (m, 2H), 2.40 (s, 3H).  $^{13}\text{C}$  NMR (101 MHz,  $\text{CDCl}_3$ )  $\delta$  142.53 (d,  $J = 2.8$  Hz), 132.91 (d,  $J = 104.0$  Hz), 132.19 (d,  $J = 10.3$  Hz), 132.13 (d,  $J = 9.9$  Hz), 131.90 (d,  $J = 2.8$  Hz), 129.33 (d,  $J = 12.5$  Hz), 129.24 (d,  $J = 107.1$  Hz), 128.52 (d,  $J = 12.1$  Hz), 21.68 (d,  $J = 1.4$  Hz).  $^{31}\text{P}$  NMR (243 MHz,  $\text{CDCl}_3$ )  $\delta$  29.18. HRMS (ESI): calculated for  $\text{C}_{19}\text{H}_{17}\text{OP}$   $[\text{M}+\text{H}]^+$ : 293.1090, found: 293.1091.

#### tri-*p*-tolylphosphine oxide (**5i**)

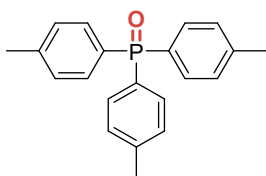

**5i** was prepared according to general procedure B using **4i** (91.3 mg, 0.3 mmol) and acetonitrile (15 mL). After steps of treatments as described, the mixture was purified by preparative thin-layer chromatography (hexane/ethyl acetate = 1:2,  $R_f = 0.24$ ) to obtain **5i** as a white solid (84.8 mg, 88% yield).  $^1\text{H}$  NMR (400 MHz,  $\text{CDCl}_3$ )  $\delta$  7.56 – 7.50 (m, 6H), 7.25 – 7.21 (m, 6H), 2.38 (s, 9H).  $^{13}\text{C}$  NMR (101 MHz,  $\text{CDCl}_3$ )  $\delta$  142.28 (d,  $J = 2.9$  Hz), 132.17 (d,  $J = 10.2$  Hz), 130.35, 129.24 (d,  $J = 12.4$  Hz), 21.68 (d,  $J = 1.3$  Hz).  $^{31}\text{P}$  NMR (202 MHz,  $\text{CDCl}_3$ )  $\delta$  29.16. HRMS (ESI): calculated for  $\text{C}_{21}\text{H}_{21}\text{OP}$



$[M+H]^+$ : 321.1403, found: 321.1410.

### tris(4-methoxyphenyl)phosphine oxide (**5j**)

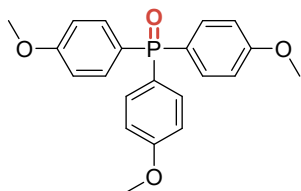

**5j** was prepared according to general procedure B using **4j** (105.7 mg, 0.3 mmol) and acetonitrile (15 mL). After steps of treatments as described, the mixture was purified by preparative thin-layer chromatography (dichloromethane/methanol = 20:1,  $R_f$  = 0.39) to obtain **5j** as a white solid (99.8 mg, 90% yield).  $^1\text{H}$  NMR (400 MHz,  $\text{CDCl}_3$ )  $\delta$  7.55 – 7.48 (m, 6H), 6.91 – 6.88 (m, 6H), 3.77 (s, 9H).  $^{13}\text{C}$  NMR (101 MHz,  $\text{CDCl}_3$ )  $\delta$  162.28 (d,  $J$  = 2.9 Hz), 133.81 (d,  $J$  = 11.2 Hz), 124.51 (d,  $J$  = 110.9 Hz), 113.94 (d,  $J$  = 13.1 Hz), 55.30.  $^{31}\text{P}$  NMR (202 MHz,  $\text{CDCl}_3$ )  $\delta$  28.63. HRMS (ESI): calculated for  $\text{C}_{21}\text{H}_{21}\text{O}_4\text{P}$   $[M+H]^+$ : 369.1250, found: 369.1259.

### tris(3-methoxyphenyl)phosphine oxide (**5k**)

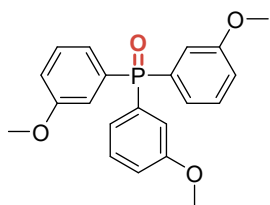

**5k** was prepared according to general procedure B using **4k** (105.7 mg, 0.3 mmol) and acetonitrile (15 mL). After steps of treatments as described, the mixture was purified by preparative thin-layer chromatography (dichloromethane/methanol = 20:1,  $R_f$  = 0.42) to obtain **5k** as a white solid (107.6 mg, 97% yield).  $^1\text{H}$  NMR (400 MHz,  $\text{CDCl}_3$ )  $\delta$  7.38 – 7.33 (m, 3H), 7.31 – 7.26 (m, 3H), 7.17 – 7.11 (m, 3H), 7.08 – 7.05 (m, 3H), 3.79 (s, 9H).  $^{13}\text{C}$  NMR (101 MHz,  $\text{CDCl}_3$ )  $\delta$  159.64 (d,  $J$  = 15.0 Hz), 133.74 (d,  $J$  = 103.6 Hz), 129.72 (d,  $J$  = 14.5 Hz), 124.41 (d,  $J$  = 10.2 Hz), 118.31 (d,  $J$  = 2.6 Hz), 116.80 (d,  $J$  = 10.8 Hz), 55.50.  $^{31}\text{P}$  NMR (202 MHz,  $\text{CDCl}_3$ )  $\delta$  29.66. HRMS (ESI): calculated for  $\text{C}_{21}\text{H}_{21}\text{O}_4\text{P}$   $[M+H]^+$ : 369.1250, found: 369.1254.

### tris(2-methoxyphenyl)phosphine oxide (**5l**)

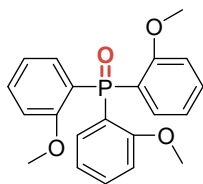

**5l** was prepared according to general procedure B using **4l** (105.7 mg, 0.3 mmol) and acetonitrile (15 mL). After steps of treatments as described, the mixture was purified by preparative thin-layer chromatography (dichloromethane/methanol = 20:1,  $R_f = 0.29$ ) to obtain **5l** as a white solid (106.6 mg, 96% yield).  $^1\text{H}$  NMR (400 MHz,  $\text{CDCl}_3$ )  $\delta$  7.51 – 7.46 (m, 3H), 7.46 – 7.39 (m, 3H), 6.96 – 6.91 (m, 3H), 6.88 – 6.84 (m, 3H), 3.52 (s, 9H).  $^{13}\text{C}$  NMR (101 MHz,  $\text{CDCl}_3$ )  $\delta$  161.51 (d,  $J = 2.5$  Hz), 134.44 (d,  $J = 8.8$  Hz), 133.12 (d,  $J = 2.2$  Hz), 121.31 (d,  $J = 110.2$  Hz), 120.30 (d,  $J = 12.6$  Hz), 111.28 (d,  $J = 6.6$  Hz), 55.49.  $^{31}\text{P}$  NMR (202 MHz,  $\text{CDCl}_3$ )  $\delta$  25.56. HRMS (ESI): calculated for  $\text{C}_{21}\text{H}_{21}\text{O}_4\text{P}$   $[\text{M}+\text{H}]^+$ : 369.1250, found: 369.1260.

### tris(4-fluorophenyl)phosphine oxide (**5m**)

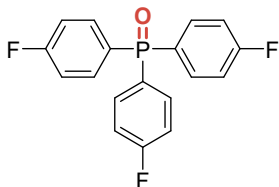

**5m** was prepared according to general procedure B using **4m** (94.9 mg, 0.3 mmol) and acetonitrile (15 mL). After steps of treatments as described, the mixture was purified by preparative thin-layer chromatography (hexane/ethyl acetate = 1:2,  $R_f = 0.36$ ) to obtain **5m** as a white solid (93.3 mg, 94% yield).  $^1\text{H}$  NMR (400 MHz,  $\text{CDCl}_3$ )  $\delta$  7.67 – 7.59 (m, 6H), 7.20 – 7.13 (m, 6H).  $^{13}\text{C}$  NMR (101 MHz,  $\text{CDCl}_3$ )  $\delta$  165.31 (dd,  $J = 254.4, 3.2$  Hz), 134.58 (dd,  $J = 11.4, 8.8$  Hz), 128.24 (dd,  $J = 108.3, 3.4$  Hz), 116.23 (dd,  $J = 21.4, 13.4$  Hz).  $^{19}\text{F}$  NMR (471 MHz,  $\text{CDCl}_3$ )  $\delta$  -106.00.  $^{31}\text{P}$  NMR (202 MHz,  $\text{CDCl}_3$ )  $\delta$  26.72. HRMS (ESI): calculated for  $\text{C}_{18}\text{H}_{12}\text{F}_3\text{OP}$   $[\text{M}+\text{H}]^+$ : 333.0651, found: 333.0651.

### tris(4-chlorophenyl)phosphine oxide (**5n**)

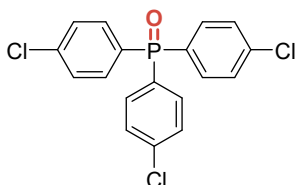

**5n** was prepared according to general procedure B using **4n** (109.7 mg, 0.3 mmol) and acetonitrile (15 mL). After steps of treatments as described, the mixture was purified by preparative thin-layer chromatography (hexane/ethyl acetate = 1:2,  $R_f$  = 0.51) to obtain **5n** as a white solid (90.5 mg, 79% yield).  $^1\text{H}$  NMR (400 MHz,  $\text{CDCl}_3$ )  $\delta$  7.59 – 7.53 (m, 6H), 7.47 – 7.44 (m, 6H).  $^{13}\text{C}$  NMR (101 MHz,  $\text{CDCl}_3$ )  $\delta$  139.22 (d,  $J$  = 3.3 Hz), 133.42 (d,  $J$  = 10.8 Hz), 130.35 (d,  $J$  = 106.4 Hz), 129.24 (d,  $J$  = 12.9 Hz).  $^{31}\text{P}$  NMR (202 MHz,  $\text{CDCl}_3$ )  $\delta$  26.82. HRMS (ESI): calculated for  $\text{C}_{18}\text{H}_{12}\text{Cl}_3\text{OP}$   $[\text{M}+\text{H}]^+$ : 380.9764, found: 380.9764.

### tri(furan-2-yl)phosphine oxide (**5o**)

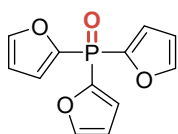

**5o** was prepared according to general procedure B using **4o** (69.6 mg, 0.3 mmol) and acetonitrile (15 mL). After steps of treatments as described, the mixture was purified by preparative thin-layer chromatography (dichloromethane/methanol = 20:1,  $R_f$  = 0.47) to obtain **5o** as a white solid (50.7 mg, 68% yield).  $^1\text{H}$  NMR (400 MHz,  $\text{CDCl}_3$ )  $\delta$  7.73 – 7.70 (m, 3H), 7.16 – 7.13 (m, 3H), 6.54 – 6.52 (m, 3H).  $^{13}\text{C}$  NMR (101 MHz,  $\text{CDCl}_3$ )  $\delta$  148.98 (d,  $J$  = 8.8 Hz), 146.06 (d,  $J$  = 158.5 Hz), 123.59 (d,  $J$  = 22.0 Hz), 111.16 (d,  $J$  = 9.3 Hz).  $^{31}\text{P}$  NMR (243 MHz,  $\text{CDCl}_3$ )  $\delta$  -11.70. HRMS (ESI): calculated for  $\text{C}_{12}\text{H}_9\text{O}_4\text{P}$   $[\text{M}+\text{H}]^+$ : 249.0311, found: 249.0311.

### diphenyl(pyridin-2-yl)phosphine oxide (**5p**)

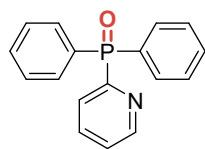

**5p** was prepared according to general procedure B using **4p** (79.0 mg, 0.3 mmol) and acetonitrile (15 mL). After steps of treatments as described, the mixture was purified by preparative thin-layer chromatography (dichloromethane/methanol = 20:1,  $R_f$  = 0.37) to obtain **5p** as a white solid (77.9 mg, 93% yield).  $^1\text{H}$  NMR (400 MHz,  $\text{CDCl}_3$ )  $\delta$  8.74 (d,  $J$  = 4.6 Hz, 1H), 8.27 (t,  $J$  = 6.8 Hz, 1H), 7.90 – 7.77 (m, 5H), 7.50 – 7.32 (m, 7H).  $^{13}\text{C}$  NMR (101 MHz,  $\text{CDCl}_3$ )  $\delta$  156.40 (d,  $J$  = 131.9 Hz), 150.17 (d,  $J$  = 19.1 Hz), 136.21 (d,  $J$  = 9.3 Hz), 132.22 (d,  $J$  = 104.4 Hz), 132.13 (d,  $J$  = 9.5 Hz), 131.93 (d,  $J$  = 2.9 Hz), 128.38 (d,  $J$  = 12.1 Hz), 128.36 (d,  $J$  = 20.0 Hz), 125.31 (d,  $J$  = 3.1 Hz).  $^{31}\text{P}$  NMR (243 MHz,  $\text{CDCl}_3$ )  $\delta$  20.80. HRMS (ESI): calculated for  $\text{C}_{17}\text{H}_{14}\text{NOP}$   $[\text{M}+\text{H}]^+$ : 280.0886, found: 280.0886.

### tricyclohexylphosphine oxide (**5q**)

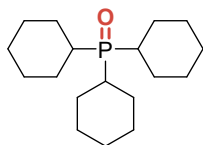

**5q** was prepared according to general procedure B using **4q** (84.1 mg, 0.3 mmol) and acetonitrile (15 mL). After steps of treatments as described, the mixture was purified by preparative thin-layer chromatography (dichloromethane/methanol = 20:1,  $R_f = 0.37$ ) to obtain **5q** as a white solid (66.9 mg, 75% yield).  $^1\text{H}$  NMR (400 MHz,  $\text{CDCl}_3$ )  $\delta$  1.93 – 1.70 (m, 18H), 1.47 – 1.19 (m, 15H).  $^{13}\text{C}$  NMR (101 MHz,  $\text{CDCl}_3$ )  $\delta$  35.45 (d,  $J = 60.6$  Hz), 27.04 (d,  $J = 11.6$  Hz), 26.44 (d,  $J = 2.9$  Hz), 26.25 (d,  $J = 1.5$  Hz).  $^{31}\text{P}$  NMR (202 MHz,  $\text{CDCl}_3$ )  $\delta$  50.25. HRMS (ESI): calculated for  $\text{C}_{18}\text{H}_{33}\text{OP}$   $[\text{M}+\text{H}]^+$ : 297.2342, found: 297.2345.

### ethyl diphenylphosphinate (**5r**)

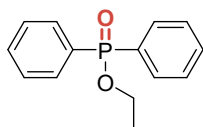

**5r** was prepared according to general procedure B using **4r** (69.1 mg, 0.3 mmol) and acetonitrile (15 mL). After steps of treatments as described, the mixture was purified by preparative thin-layer chromatography (dichloromethane/methanol = 20:1,  $R_f = 0.53$ ) to obtain **5r** as a colorless oil (71.5 mg, 97% yield).  $^1\text{H}$  NMR (400 MHz,  $\text{CDCl}_3$ )  $\delta$  7.85 – 7.78 (m, 4H), 7.53 – 7.48 (m, 2H), 7.46 – 7.40 (m, 4H), 4.10 (p,  $J = 7.1$  Hz, 2H), 1.36 (t,  $J = 7.0$  Hz, 3H).  $^{13}\text{C}$  NMR (101 MHz,  $\text{CDCl}_3$ )  $\delta$  132.19 (d,  $J = 2.9$  Hz), 131.80 (d,  $J = 137.6$  Hz), 131.74 (d,  $J = 10.2$  Hz), 61.22 (d,  $J = 5.8$  Hz), 16.61 (d,  $J = 6.7$  Hz).  $^{31}\text{P}$  NMR (243 MHz,  $\text{CDCl}_3$ )  $\delta$  31.28. HRMS (ESI): calculated for  $\text{C}_{14}\text{H}_{15}\text{O}_2\text{P}$   $[\text{M}+\text{H}]^+$ : 247.0882, found: 247.0879.

### dimethyl phenylphosphonate (**5s**)

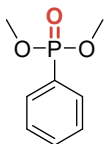

**5s** was prepared according to general procedure B using **4s** (51.0 mg, 0.3 mmol) and acetonitrile (15 mL). After steps of treatments as described, the mixture was purified by preparative thin-layer

chromatography (dichloromethane/methanol = 20:1,  $R_f$  = 0.47) to obtain **5s** as a colorless oil (52.9 mg, 95% yield).  $^1\text{H}$  NMR (400 MHz,  $\text{CDCl}_3$ )  $\delta$  7.83 – 7.76 (m, 2H), 7.59 – 7.54 (m, 1H), 7.50 – 7.44 (m, 2H), 3.77 (s, 3H), 3.74 (s, 3H).  $^{13}\text{C}$  NMR (101 MHz,  $\text{CDCl}_3$ )  $\delta$  132.78 (d,  $J$  = 3.0 Hz), 132.02 (d,  $J$  = 9.9 Hz), 128.69 (d,  $J$  = 15.1 Hz), 127.05 (d,  $J$  = 188.6 Hz), 52.82 (d,  $J$  = 5.6 Hz).  $^{31}\text{P}$  NMR (243 MHz,  $\text{CDCl}_3$ )  $\delta$  21.63. HRMS (ESI): calculated for  $\text{C}_8\text{H}_{11}\text{O}_3\text{P}$   $[\text{M}+\text{H}]^+$ : 187.0519, found: 187.0515.

### triphenyl phosphate (**5t**)

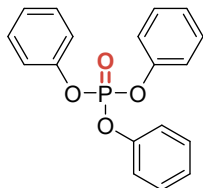

**5t** was prepared according to general procedure B using **4t** (93.1 mg, 0.3 mmol) and acetonitrile (15 mL). After steps of treatments as described, the mixture was purified by preparative thin-layer chromatography (hexane/ethyl acetate = 4:1,  $R_f$  = 0.46) to obtain **5t** as a white solid (90.4 mg, 92% yield).  $^1\text{H}$  NMR (400 MHz,  $\text{CDCl}_3$ )  $\delta$  7.40 – 7.33 (m, 6H), 7.27 – 7.19 (m, 9H).  $^{13}\text{C}$  NMR (101 MHz,  $\text{CDCl}_3$ )  $\delta$  150.59 (d,  $J$  = 7.4 Hz), 129.99, 125.73 (d,  $J$  = 1.4 Hz), 120.26 (d,  $J$  = 4.9 Hz).  $^{31}\text{P}$  NMR (202 MHz,  $\text{CDCl}_3$ )  $\delta$  -17.71. HRMS (ESI): calculated for  $\text{C}_{18}\text{H}_{15}\text{O}_4\text{P}$   $[\text{M}+\text{H}]^+$ : 327.0781, found: 327.0785.

### triethyl phosphate (**5u**)

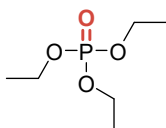

**5u** was prepared according to general procedure B using **4u** (49.8 mg, 0.3 mmol) and acetonitrile (15 mL). After steps of treatments as described, the mixture was purified by preparative thin-layer chromatography (dichloromethane/methanol = 20:1,  $R_f$  = 0.66) to obtain **5u** as a colorless oil (52.1 mg, 95% yield).  $^1\text{H}$  NMR (400 MHz,  $\text{CDCl}_3$ )  $\delta$  4.14 – 4.05 (m, 6H), 1.35 – 1.30 (m, 9H).  $^{13}\text{C}$  NMR (101 MHz,  $\text{CDCl}_3$ )  $\delta$  63.73 (d,  $J$  = 5.8 Hz), 16.25 (d,  $J$  = 6.7 Hz).  $^{31}\text{P}$  NMR (202 MHz,  $\text{CDCl}_3$ )  $\delta$  -0.92. HRMS (ESI): calculated for  $\text{C}_6\text{H}_{15}\text{O}_4\text{P}$   $[\text{M}+\text{H}]^+$ : 183.0781, found: 183.0783.

## 4. Mechanistic studies

### 4.1 Control experiments

Procedures for control experiments:

A 130 mL test tube was charged with 15 mL of solvent containing **1a** (37.3 mg, 0.3 mmol). Then the test tube was sealed and placed without receiving  $^{60}\text{Co}$   $\gamma$ -ray radiation. After 15 h, the reaction mixture was diluted and analyzed by GC-MS with 1,3,5-trimethoxybenzene as the internal standard.

A 100 mL Schlenk vial was charged with 15 mL of solvent containing **1a** (37.3 mg, 0.3 mmol). Then the reaction mixture was degassed with three freeze-pump-thaw cycles and filled with high-purity (99.999%) argon. Then the Schlenk vial was sealed and exposed to  $^{60}\text{Co}$   $\gamma$ -ray radiation (dose rate: 110 Gy  $\text{min}^{-1}$ , measured using a Fricke dosimeter) at room temperature for 15 h. After the reaction, the reaction mixture was diluted and analyzed by GC-MS with 1,3,5-trimethoxybenzene as the internal standard.

**Table S6** Evaluation of  $\gamma$ -ray radiation<sup>a</sup>

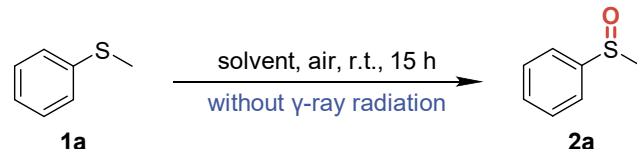

| Entry | Solvent            | Yield of <b>2a</b> (%) <sup>b</sup> |
|-------|--------------------|-------------------------------------|
| 1     | CH <sub>3</sub> CN | n.d.                                |
| 2     | CH <sub>3</sub> OH | n.d.                                |
| 3     | Cyclohexane        | n.d.                                |
| 4     | THF                | n.d.                                |

<sup>a</sup> Reaction conditions: **1a** (0.3 mmol) in solvent (15 mL) without  $\gamma$ -ray radiation at room temperature and under an air atmosphere for 15 h. <sup>b</sup> Determined by GC-MS using 1,3,5-trimethoxybenzene as the internal standard.

**Table S7** Evaluation of the reaction atmosphere<sup>a</sup>

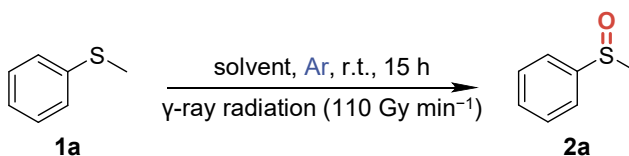

| Entry | Solvent            | Yield of <b>2a</b> (%) <sup>b</sup> |
|-------|--------------------|-------------------------------------|
| 1     | CH <sub>3</sub> CN | n.d.                                |
| 2     | CH <sub>3</sub> OH | n.d.                                |
| 3     | Cyclohexane        | n.d.                                |
| 4     | THF                | n.d.                                |

<sup>a</sup> Reaction conditions: **1a** (0.3 mmol) in solvent (15 mL) with  $\gamma$ -ray radiation (dose rate: 110 Gy min<sup>-1</sup>, measured using a Fricke dosimeter) at room temperature and under an argon atmosphere for 15 h. <sup>b</sup> Determined by GC-MS using 1,3,5-trimethoxybenzene as the internal standard.

#### 4.2 ROS detection using fluorescence probe DCFH

A stock solution of DCFH (10 mM in acetonitrile) was diluted in acetonitrile to a final concentration of 100  $\mu$ M. A 5 mL glass vial was charged with 1 mL DCFH solution (100  $\mu$ M in acetonitrile). Then the glass vial was sealed and exposed to <sup>60</sup>Co  $\gamma$ -ray radiation (dose rate: 110 Gy min<sup>-1</sup>, measured using a Fricke dosimeter) at room temperature for different reaction times. After the reaction, the reaction mixture was transferred to the 1 cm path semi-micro polystyrene cuvette to record the fluorescence emission spectrum (Fig. S2).

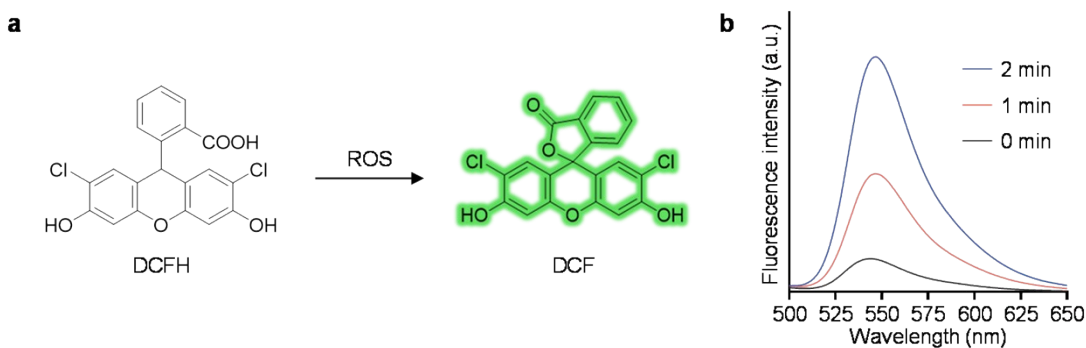

**Fig. S2** ROS detection using fluorescence probe DCFH. (a) The mechanism of DCFH as the ROS fluorescent probe. (b) The fluorescence emission spectra ( $\lambda_{\text{ex}} = 485$  nm) of DCFH (100  $\mu$ M in acetonitrile) after receiving <sup>60</sup>Co  $\gamma$ -ray radiation at different times.

#### 4.3 O<sub>2</sub><sup>-</sup> detection using O<sub>2</sub><sup>-</sup>-specific probe NBT

A stock solution of NBT (1 mM in acetonitrile) was diluted in acetonitrile to a final concentration of 100  $\mu$ M. A 5 mL glass vial was charged with 1 mL NBT solution (100  $\mu$ M in acetonitrile). Then the glass vial was sealed and exposed to <sup>60</sup>Co  $\gamma$ -ray radiation (dose rate: 110 Gy min<sup>-1</sup>, measured using a Fricke dosimeter) at room temperature for different reaction times. After the reaction, the reaction

mixture was diluted 5 times and transferred to the 1 cm path quartz cuvette to record the UV-visible absorption spectrum (Fig. S3).

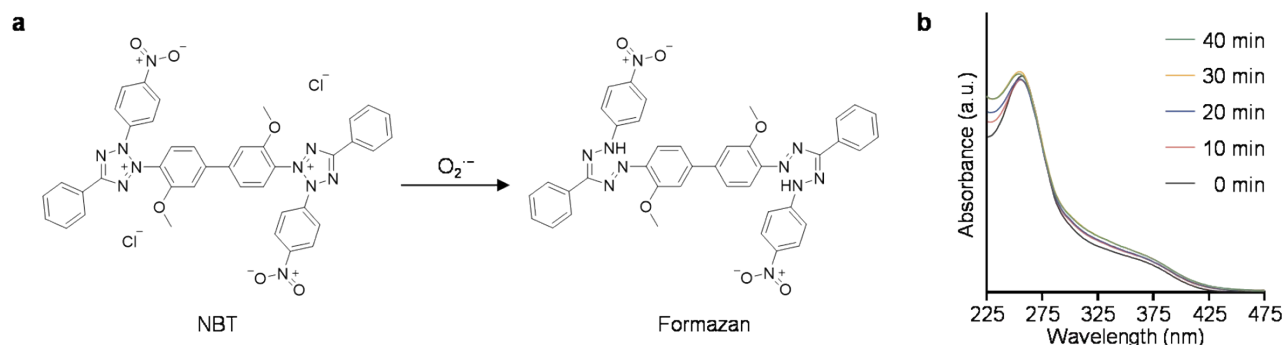

**Fig. S3**  $O_2^{\cdot-}$  detection using  $O_2^{\cdot-}$ -specific probe NBT. (a) The mechanism of NBT as the  $O_2^{\cdot-}$ -specific probe. (b) The UV-visible absorption spectra of NBT (100  $\mu$ M in acetonitrile) after receiving  $^{60}Co$   $\gamma$ -ray radiation at different times.

#### 4.4 Quenching experiments

General procedure for quenching experiments:

A 130 mL test tube was charged with 15 mL of solvent containing **1a** (37.3 mg, 0.3 mmol) and 0.6 mmol scavenger. Then the test tube was sealed and exposed to  $^{60}Co$   $\gamma$ -ray radiation (dose rate: 110 Gy  $min^{-1}$ , measured using a Fricke dosimeter) at room temperature for 15 h. After the reaction, the reaction mixture was diluted and analyzed by GC-MS with 1,3,5-trimethoxybenzene as the internal standard.

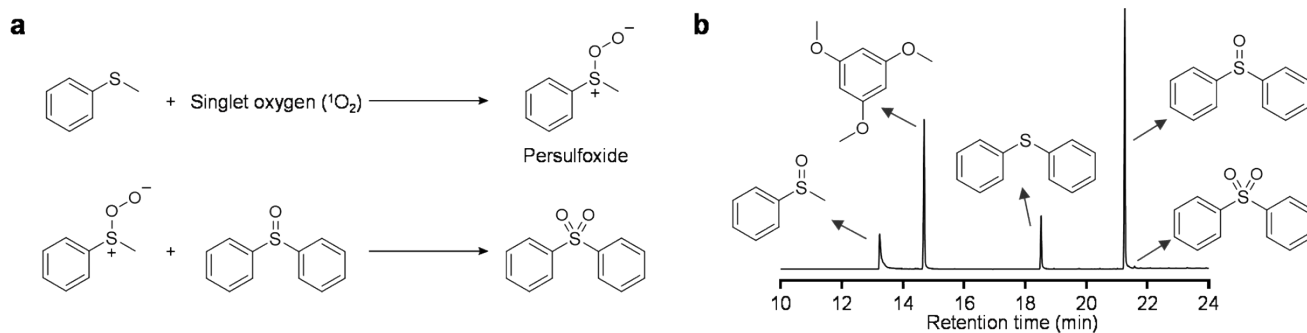

**Fig. S4** (a) The mechanism of Ph<sub>2</sub>SO as the persulfoxide scavenger. (b) GC-MS chromatogram of the quenching experiment with Ph<sub>2</sub>SO as the persulfoxide scavenger.



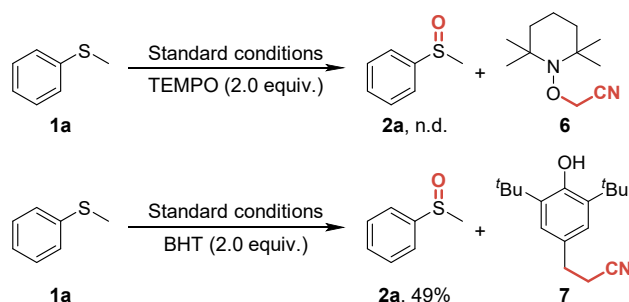

**Fig. S5** Radical trapping experiments with TEMPO or BHT as the radical scavenger. Standard conditions: **1a** (0.3 mmol) in CH<sub>3</sub>CN (15 mL) with  $\gamma$ -ray radiation (dose rate: 110 Gy min<sup>-1</sup>, measured using a Fricke dosimeter) at room temperature and under an air atmosphere for 15 h.

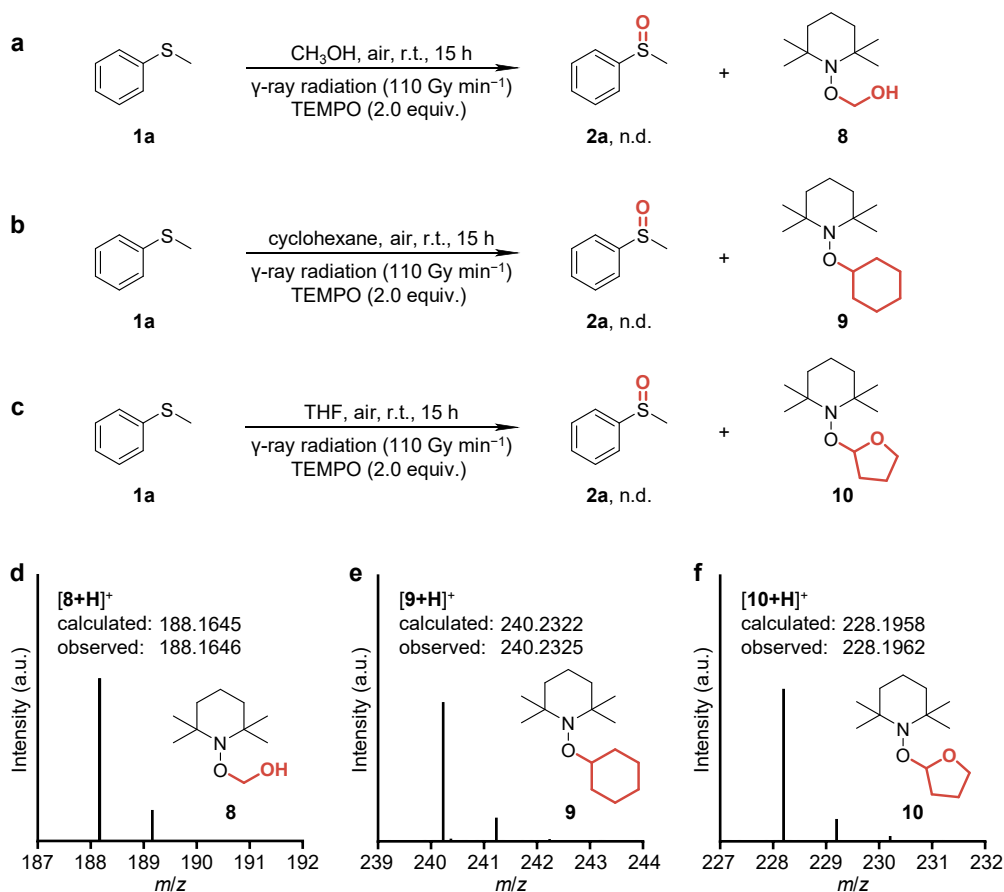

**Fig. S6** Radical trapping experiments with TEMPO as the radical scavenger. Reaction conditions: **1a** (0.3 mmol) and TEMPO (0.6 mmol) in (a) CH<sub>3</sub>OH, (b) cyclohexane, or (c) THF (15 mL) with  $\gamma$ -ray radiation (dose rate: 110 Gy min<sup>-1</sup>, measured using a Fricke dosimeter) at room temperature and under an air atmosphere for 15 h. High-resolution mass spectrometry of the adducts between TEMPO and (d)  $\cdot$ CH<sub>2</sub>OH, (e)  $\cdot$ C<sub>6</sub>H<sub>11</sub>, or (f)  $\cdot$ C<sub>4</sub>H<sub>7</sub>O.

#### 4.5 Kinetic studies with CD<sub>3</sub>CN as the solvent

A 10 mL glass vial was charged with 1 mL **1a** solution (1 mM in CD<sub>3</sub>CN or CH<sub>3</sub>CN). Then the glass vial was sealed and exposed to <sup>60</sup>Co  $\gamma$ -ray radiation (dose rate: 110 Gy min<sup>-1</sup>, measured using a Fricke dosimeter) at room temperature for different reaction times. After the reaction, the reaction mixture was analyzed by GC-MS with 1,3,5-trimethoxybenzene as the internal standard.

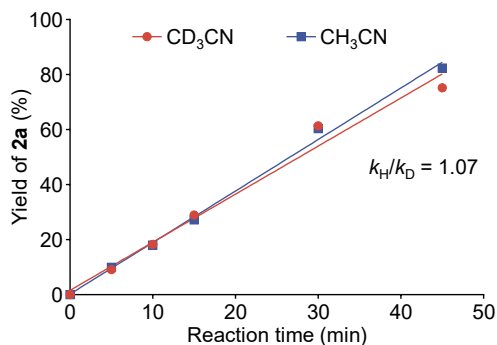

**Fig. S7** Kinetic studies with CD<sub>3</sub>CN as the solvent.

## 5. Computational studies

### 5.1 Computational details

All density functional theory (DFT)<sup>1</sup> calculations were performed with the Gaussian 16 (A.03) program<sup>2</sup> to investigate the detailed mechanism. Geometry optimizations were carried out in the solution phase by using the B3LYP functional<sup>3</sup>, where Grimme D3 correction<sup>4</sup> was utilized for the empirical dispersion. The 6-311+G(d,p) basis sets were used for all atoms.<sup>5</sup> The solvent effect was considered with the solvation model based on density (SMD).<sup>6</sup> Frequency calculations were performed for each species to make sure that all of the stationary points are minima with no imaginary frequencies or transition states with only one imaginary frequency, and to provide the thermal correction to free energies at 298.15 K and 1 atm pressure. Intrinsic reaction coordinate (IRC) calculations were carried out on each transition state to confirm that the transition state connects the reactant and product in the specific step.<sup>7</sup> In each step, the Gibbs energy difference between the transition state and the reactant is defined as the Gibbs activation energy ( $\Delta G^\ddagger$ ), and the Gibbs energy difference between the product and the reactant is defined as the Gibbs reaction energy ( $\Delta G$ ). All energies reported here are in kcal mol<sup>-1</sup>. The calculated optimized structures are illustrated by CYLview.<sup>8</sup>

### 5.2 Radiolysis of CH<sub>3</sub>CN in the presence of O<sub>2</sub>

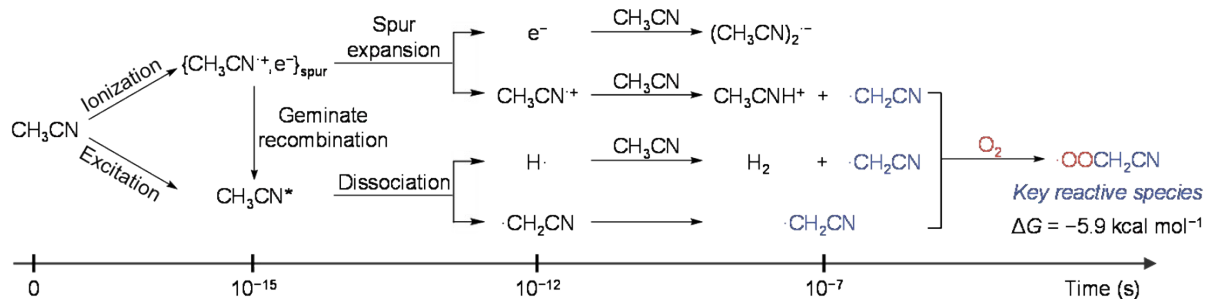

**Fig. S8** Radiolysis of CH<sub>3</sub>CN in the presence of O<sub>2</sub>.

### 5.3 Intrinsic reaction coordinate (IRC) analysis

Intrinsic reaction coordinate (IRC) calculations were carried out on each transition state in Fig. 4b and 5a to confirm that the transition state connects the reactant and product in the specific step.

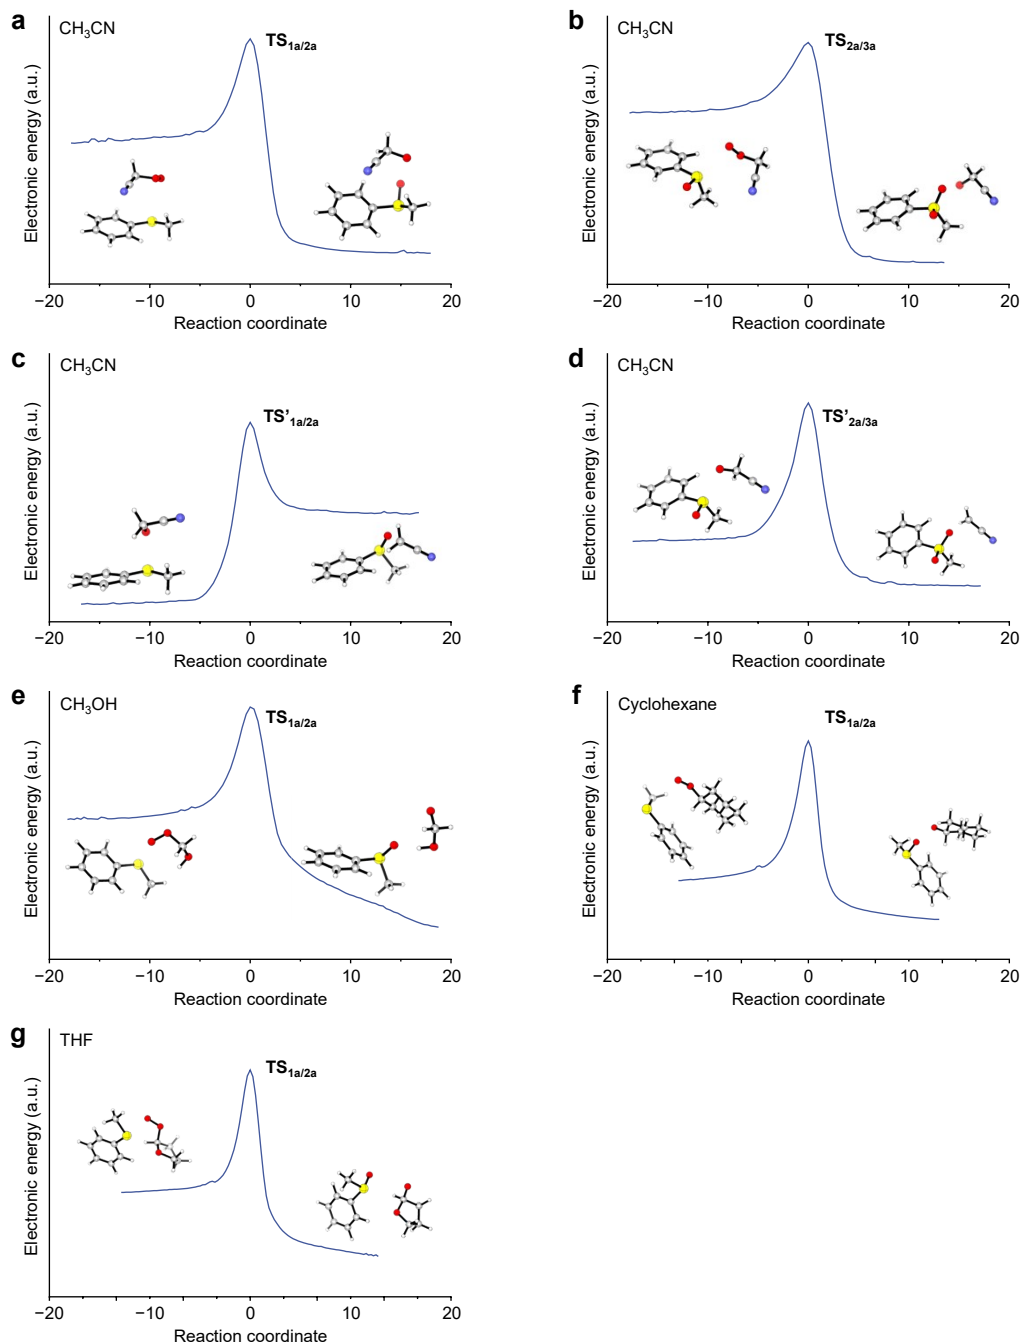

**Fig. S9** The intrinsic reaction coordinate of (a)  $\text{TS}_{1a/2a}$ , (b)  $\text{TS}_{2a/3a}$ , (c)  $\text{TS}'_{1a/2a}$ , (d)  $\text{TS}'_{2a/3a}$  in Fig. 4b, and the intrinsic reaction coordinate of  $\text{TS}_{1a/2a}$  in (e)  $\text{CH}_3\text{OH}$ , (f) cyclohexane, (g) THF in Fig. 5a.

## 5.4 Distortion-interaction analysis

Distortion-interaction analysis was performed on transition states. Each transition state structure was separated into two fragments according to the reactants, followed by the calculation of single-point energies. For each fragment, the distortion energy refers to the electronic energy change of the fragment from the equilibrium geometry to the transition state geometry. The total distortion energy of both two fragments is denoted as  $\Delta E_{\text{dist}}^{\ddagger}$ , and the distortion energies of **1a**, **2a**,  $\cdot\text{OOCH}_2\text{CN}$ ,  $\cdot\text{OCH}_2\text{CN}$ ,  $\cdot\text{OOCH}_2\text{OH}$ ,  $\cdot\text{OOCy}$  and  $\cdot\text{OOTHF}$  are denoted as  $\Delta E_{\text{dist},1\text{a}}^{\ddagger}$ ,  $\Delta E_{\text{dist},2\text{a}}^{\ddagger}$ ,  $\Delta E_{\text{dist},\cdot\text{OOCH}_2\text{CN}}^{\ddagger}$ ,  $\Delta E_{\text{dist},\cdot\text{OCH}_2\text{CN}}^{\ddagger}$ ,  $\Delta E_{\text{dist},\cdot\text{OOCH}_2\text{OH}}^{\ddagger}$ ,  $\Delta E_{\text{dist},\cdot\text{OOCy}}^{\ddagger}$  and  $\Delta E_{\text{dist},\cdot\text{OOTHF}}^{\ddagger}$ , respectively. The interaction energy ( $\Delta E_{\text{int}}^{\ddagger}$ ) refers to the energy released when the two fragments form a complete transition state. The activation energy,  $\Delta E^{\ddagger}$ , is the sum of  $\Delta E_{\text{dist}}^{\ddagger}$  and  $\Delta E_{\text{int}}^{\ddagger}$ .  $\Delta E_{\text{dist}}^{\ddagger}$  and  $\Delta E_{\text{int}}^{\ddagger}$  are calculated by the following formula:

$$\Delta E_{\text{dist}}^{\ddagger} = \Delta E_{\text{dist},1}^{\ddagger} + \Delta E_{\text{dist},2}^{\ddagger} = [E_1(\text{TS}) - E_1(\text{free})] + [E_2(\text{TS}) - E_2(\text{free})]$$

$$\Delta E_{\text{int}}^{\ddagger} = E_{\text{total}}(\text{TS}) - E_1(\text{TS}) - E_2(\text{TS})$$

where  $\Delta E_{\text{dist},1}^{\ddagger}$  represents the distortion energy of fragment 1,  $\Delta E_{\text{dist},2}^{\ddagger}$  represents the distortion energy of fragment 2,  $E_1(\text{TS})$  represents the electronic energy of fragment 1 in the transition state,  $E_2(\text{TS})$  represents the electronic energy of fragment 2 in the transition state,  $E_1(\text{free})$  represents the electronic energy of fragment 1 in the equilibrium geometry,  $E_2(\text{free})$  represents the electronic energy of fragment 2 in the equilibrium geometry, and  $E_{\text{total}}(\text{TS})$  represents the electronic energy of the transition state.

**Table S8** Electronic energies (in Hartree) of transition states and their fragments calculated at the B3LYP-D3/6-311+G(d,p)/SMD level of theory<sup>a</sup>

| Structure                   | Solvent            | $E_{\text{total}}(\text{TS})$ | $E_1(\text{TS})$ | $E_2(\text{TS})$ | $E_1(\text{free})$ | $E_2(\text{free})$ |
|-----------------------------|--------------------|-------------------------------|------------------|------------------|--------------------|--------------------|
| <b>TS</b> <sub>1a/2a</sub>  | CH <sub>3</sub> CN | -952.4250269                  | -669.8900135     | -282.5109065     | -669.8908703       | -282.5528384       |
| <b>TS</b> <sub>2a/3a</sub>  | CH <sub>3</sub> CN | -1027.629723                  | -745.0961987     | -282.5192667     | -745.0992411       | -282.5528384       |
| <b>TS'</b> <sub>1a/2a</sub> | CH <sub>3</sub> CN | -877.2204265                  | -669.8891680     | -207.3206557     | -669.8908703       | -207.3678981       |
| <b>TS'</b> <sub>2a/3a</sub> | CH <sub>3</sub> CN | -952.4346035                  | -745.0963317     | -207.3308854     | -745.0992411       | -207.3678981       |
| <b>TS</b> <sub>1a/2a</sub>  | CH <sub>3</sub> OH | -935.4169493                  | -669.8885823     | -265.5030638     | -669.8892758       | -265.5463318       |
| <b>TS</b> <sub>1a/2a</sub>  | Cyclohexane        | -1055.594718                  | -669.8866184     | -385.6941520     | -669.8878345       | -385.7411525       |
| <b>TS</b> <sub>1a/2a</sub>  | THF                | -1052.172191                  | -669.8890719     | -382.2691512     | -669.8895635       | -382.3182354       |

<sup>a</sup> Fragment 1 is related to sulfide or sulfoxide, and fragment 2 is related to solvent-derived radical.

## 6. NMR spectra

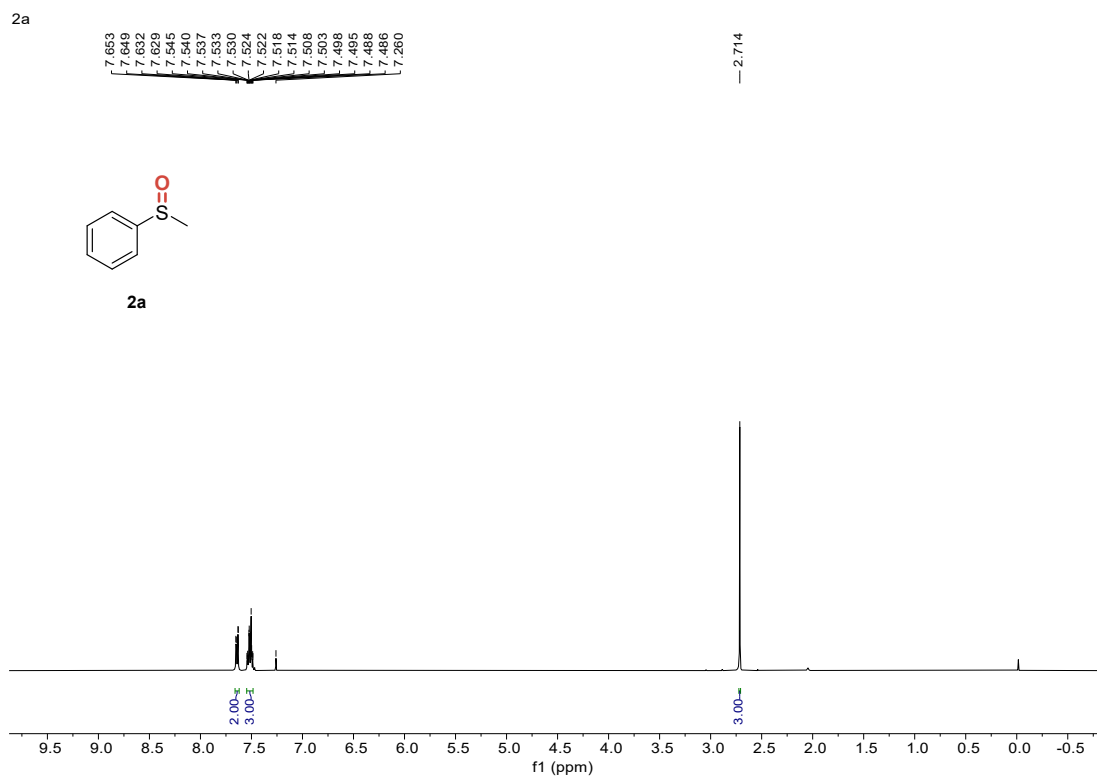

Fig. S10 <sup>1</sup>H NMR spectrum (400 MHz, CDCl<sub>3</sub>) of 2a.

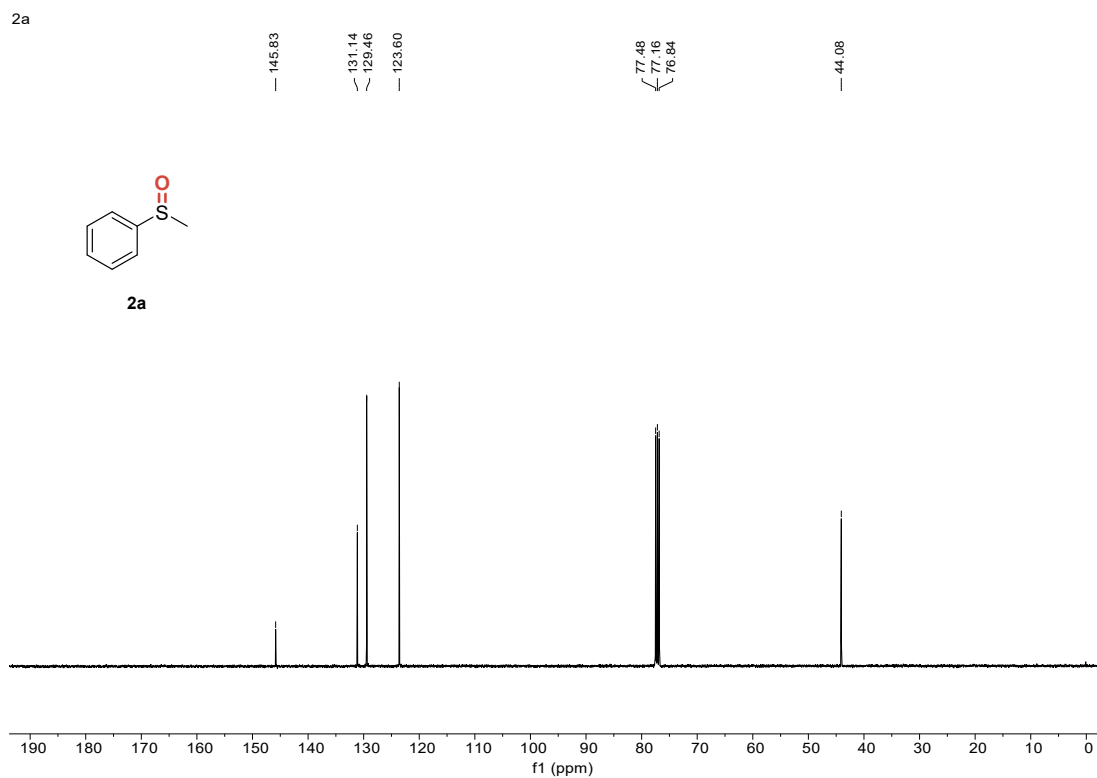

Fig. S11 <sup>13</sup>C NMR spectrum (101 MHz, CDCl<sub>3</sub>) of 2a.

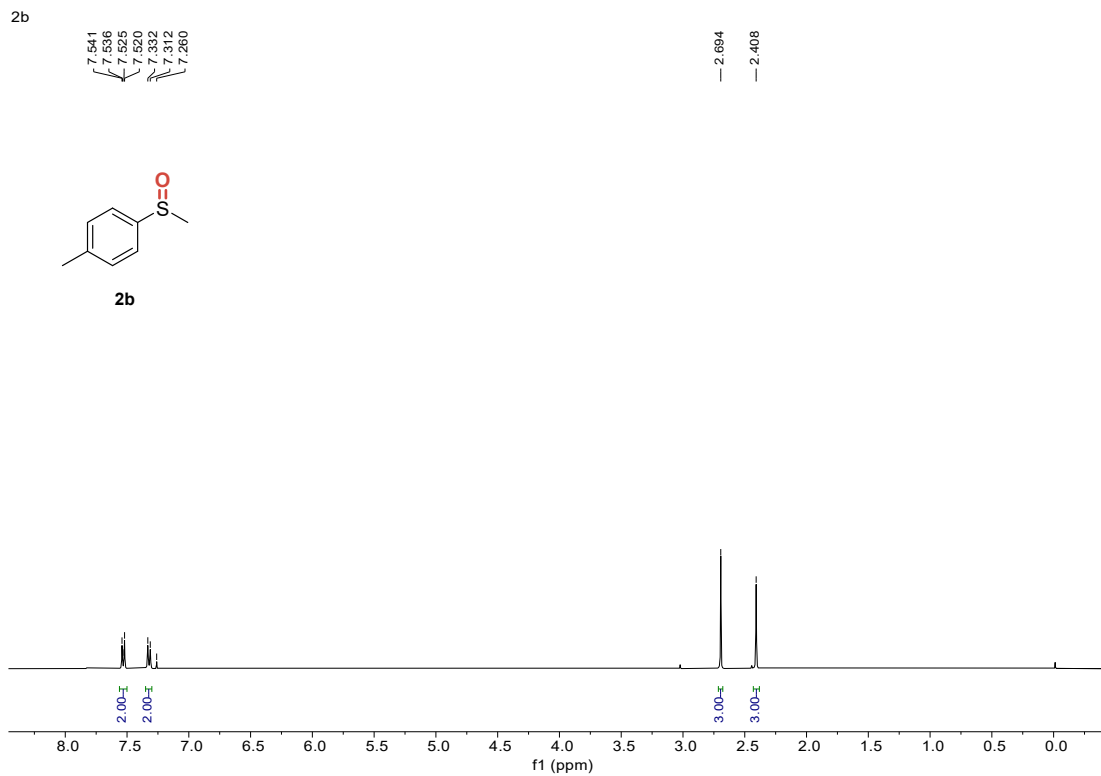

**Fig. S12**  $^1\text{H}$  NMR spectrum (400 MHz,  $\text{CDCl}_3$ ) of **2b**.

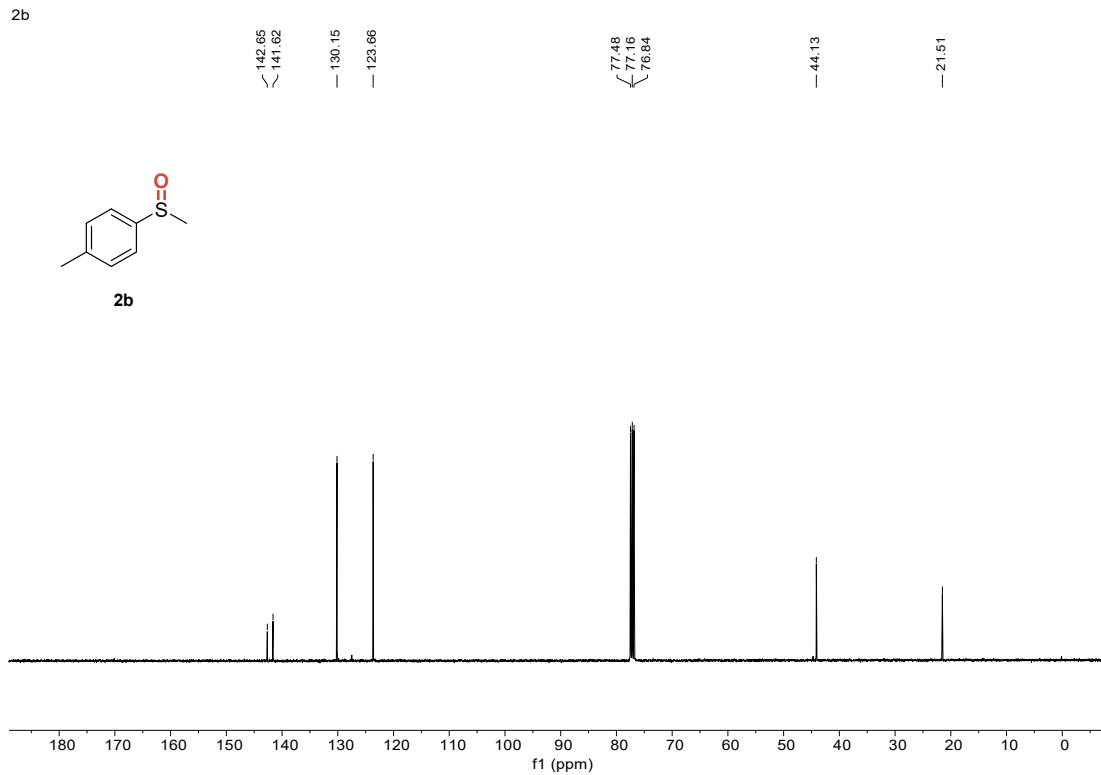

**Fig. S13**  $^{13}\text{C}$  NMR spectrum (101 MHz,  $\text{CDCl}_3$ ) of **2b**.

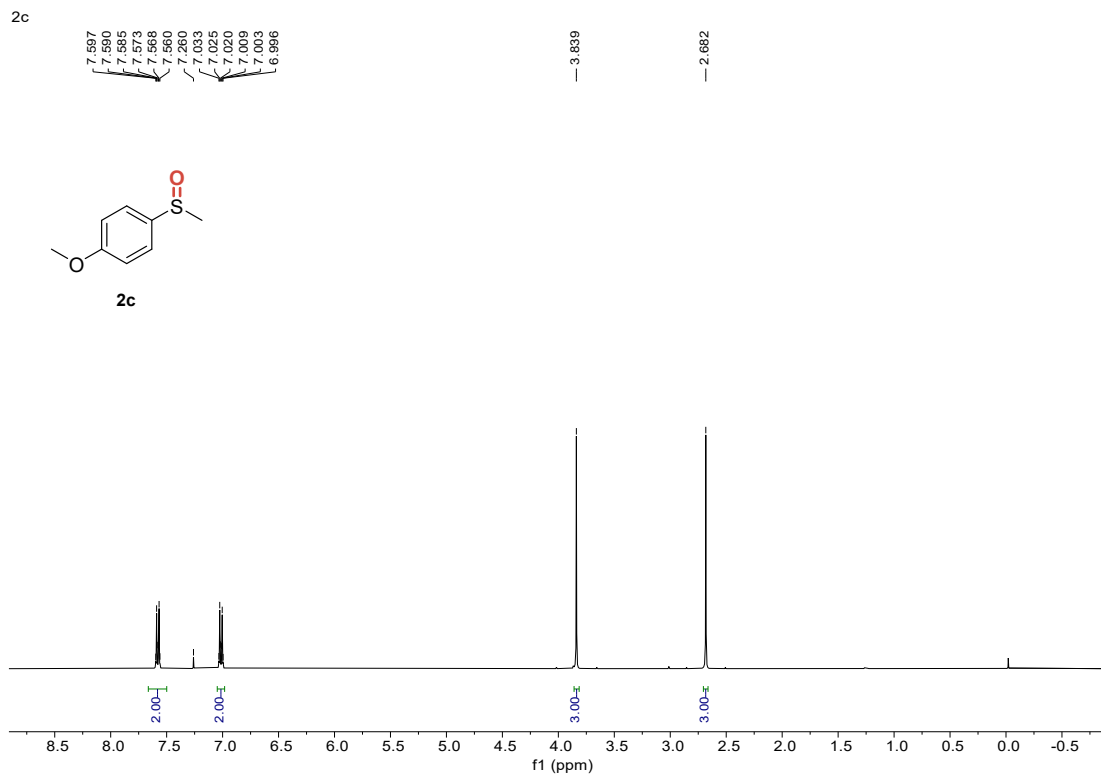

**Fig. S14**  $^1\text{H}$  NMR spectrum (400 MHz,  $\text{CDCl}_3$ ) of **2c**.

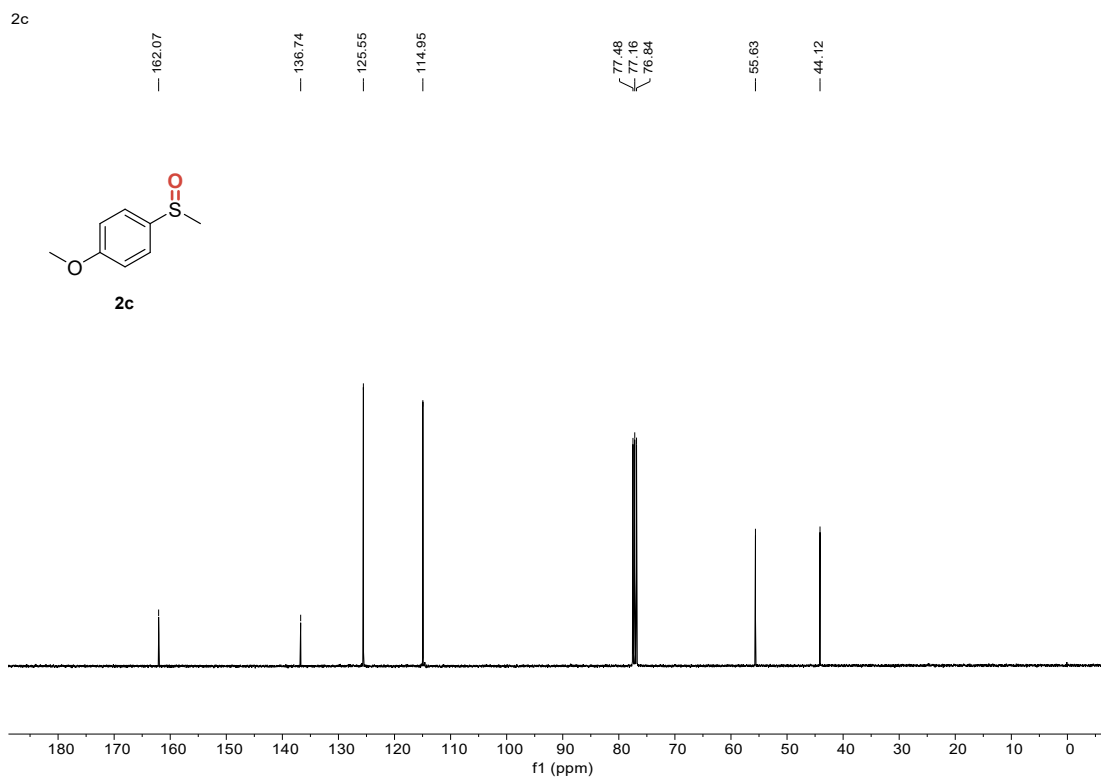

**Fig. S15**  $^{13}\text{C}$  NMR spectrum (101 MHz,  $\text{CDCl}_3$ ) of **2c**.



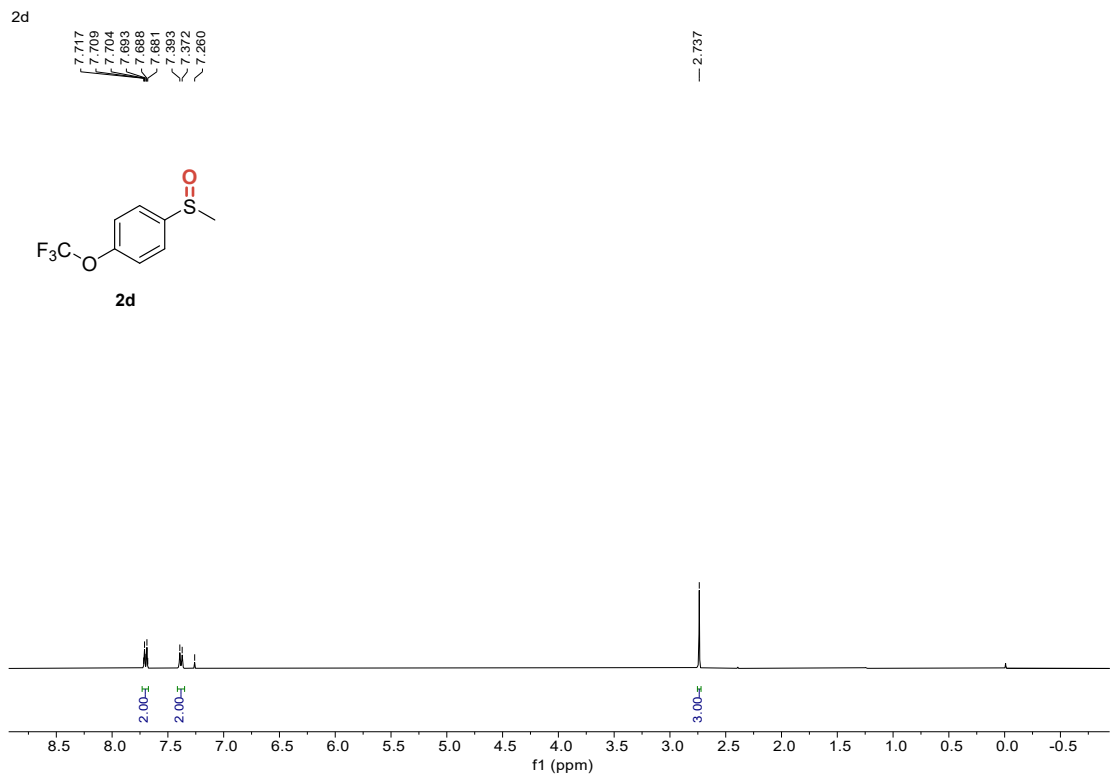

**Fig. S16**  $^1\text{H}$  NMR spectrum (400 MHz,  $\text{CDCl}_3$ ) of **2d**.

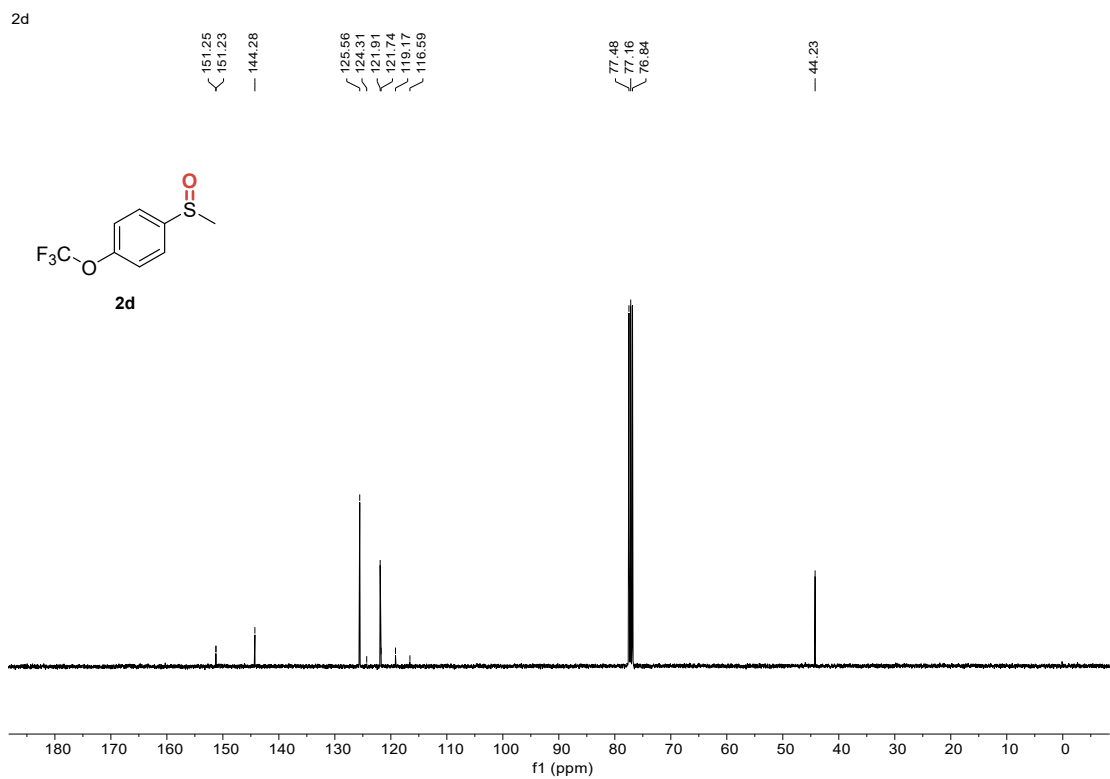

**Fig. S17**  $^{13}\text{C}$  NMR spectrum (101 MHz,  $\text{CDCl}_3$ ) of **2d**.

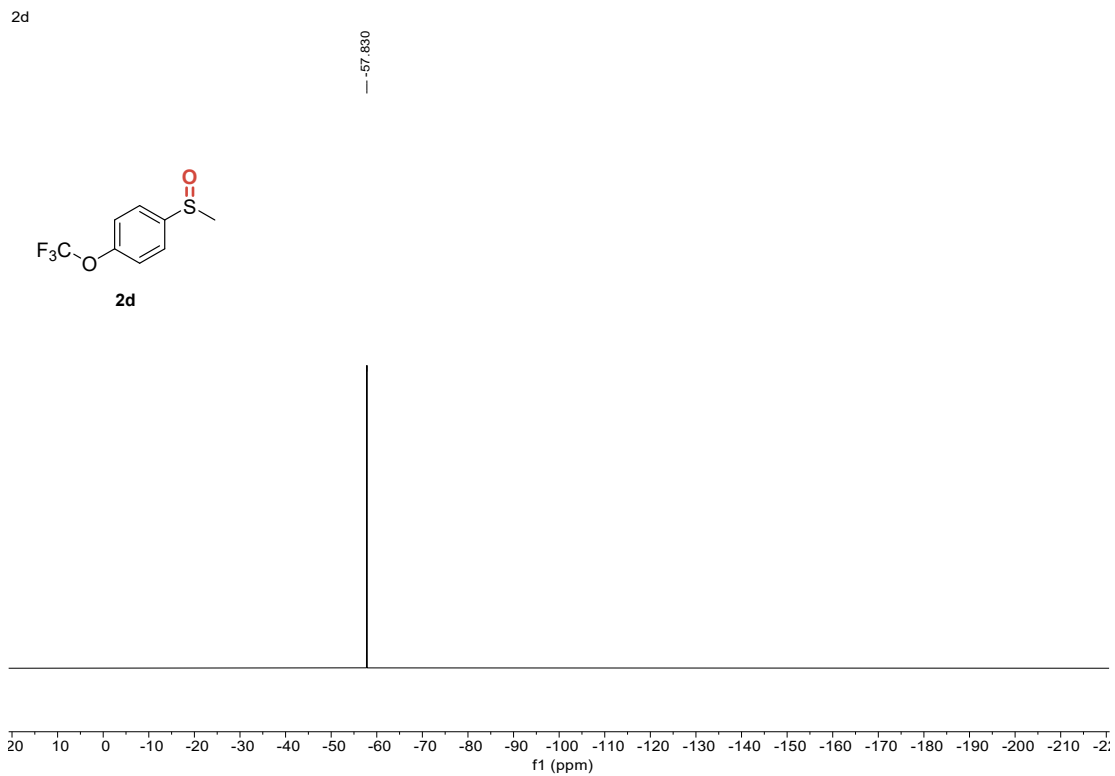

**Fig. S18**  $^{19}\text{F}$  NMR spectrum (471 MHz,  $\text{CDCl}_3$ ) of **2d**.

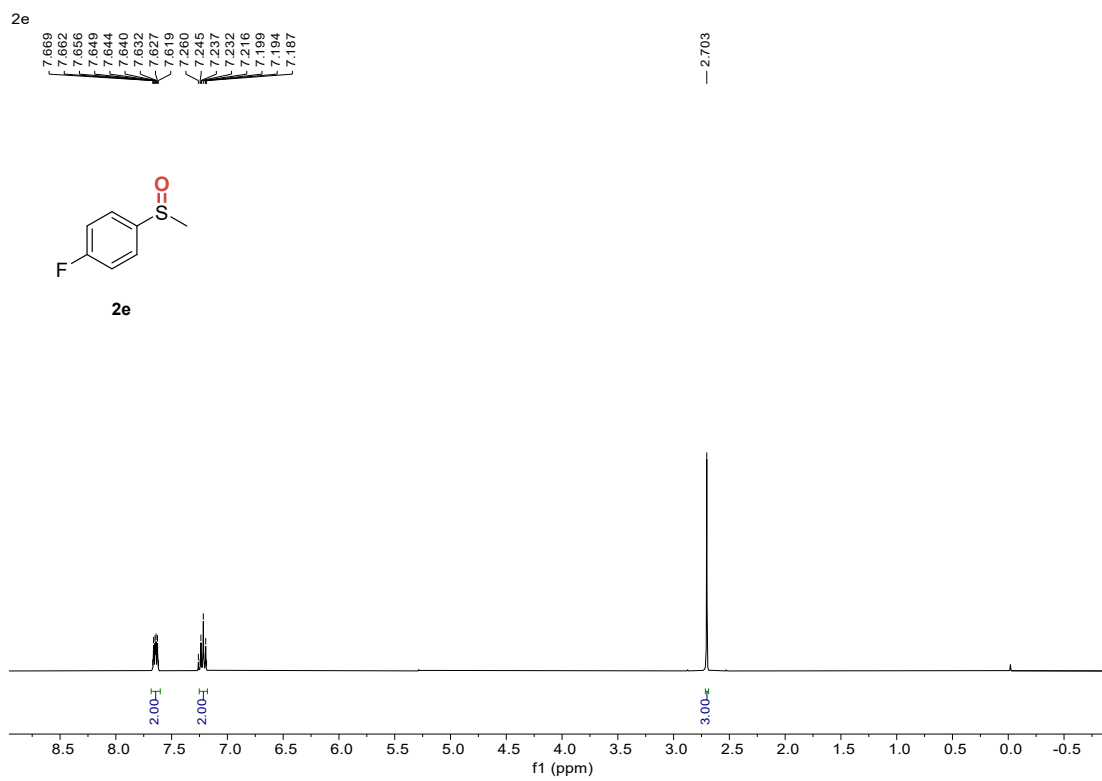

**Fig. S19**  $^1\text{H}$  NMR spectrum (400 MHz,  $\text{CDCl}_3$ ) of **2e**.

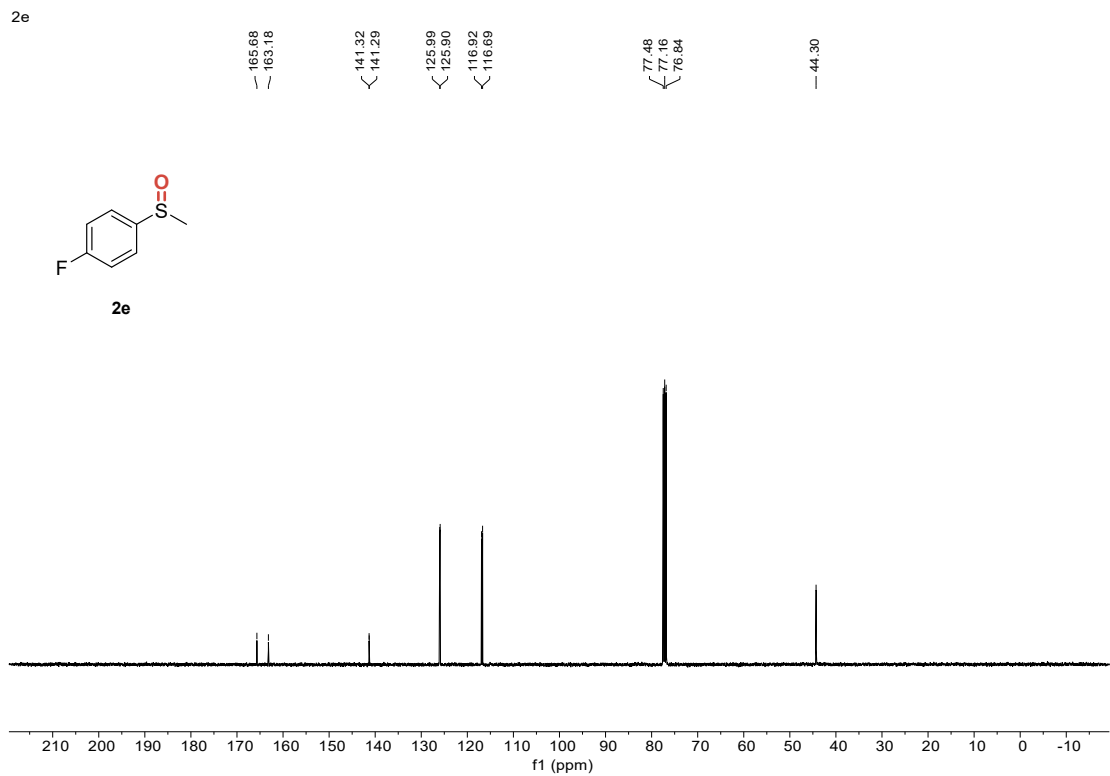

Fig. S20  $^{13}\text{C}$  NMR spectrum (101 MHz,  $\text{CDCl}_3$ ) of **2e**.

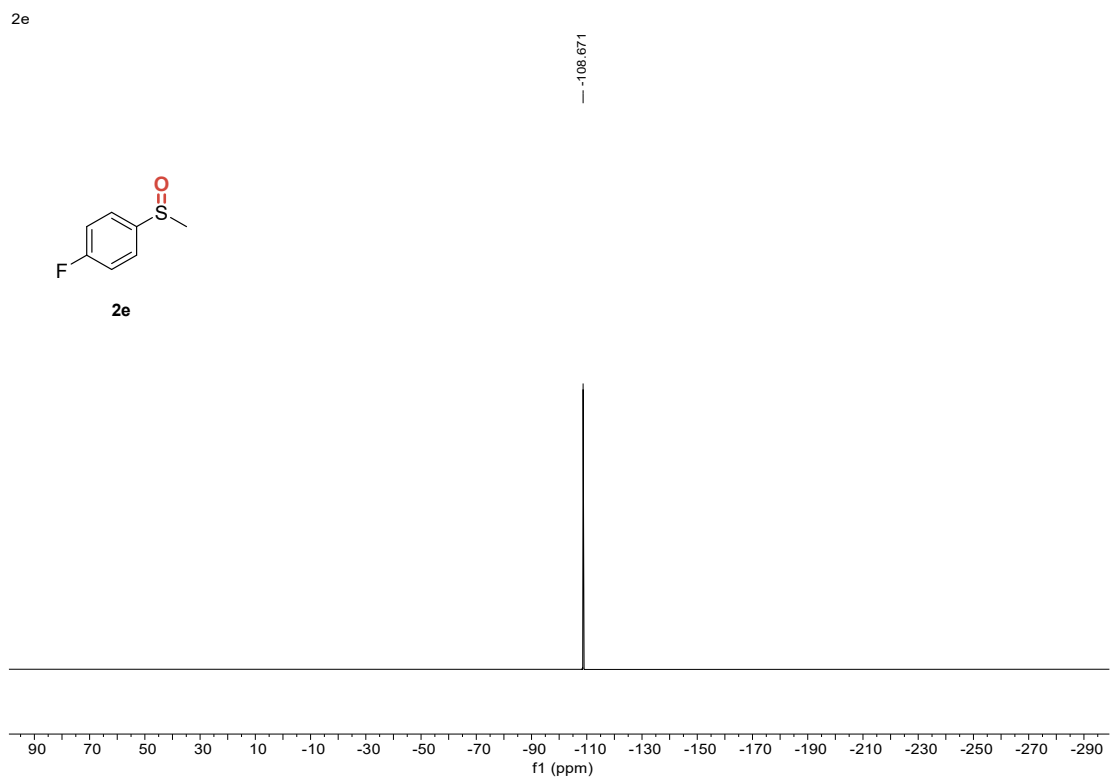

Fig. S21  $^{19}\text{F}$  NMR spectrum (471 MHz,  $\text{CDCl}_3$ ) of **2e**.

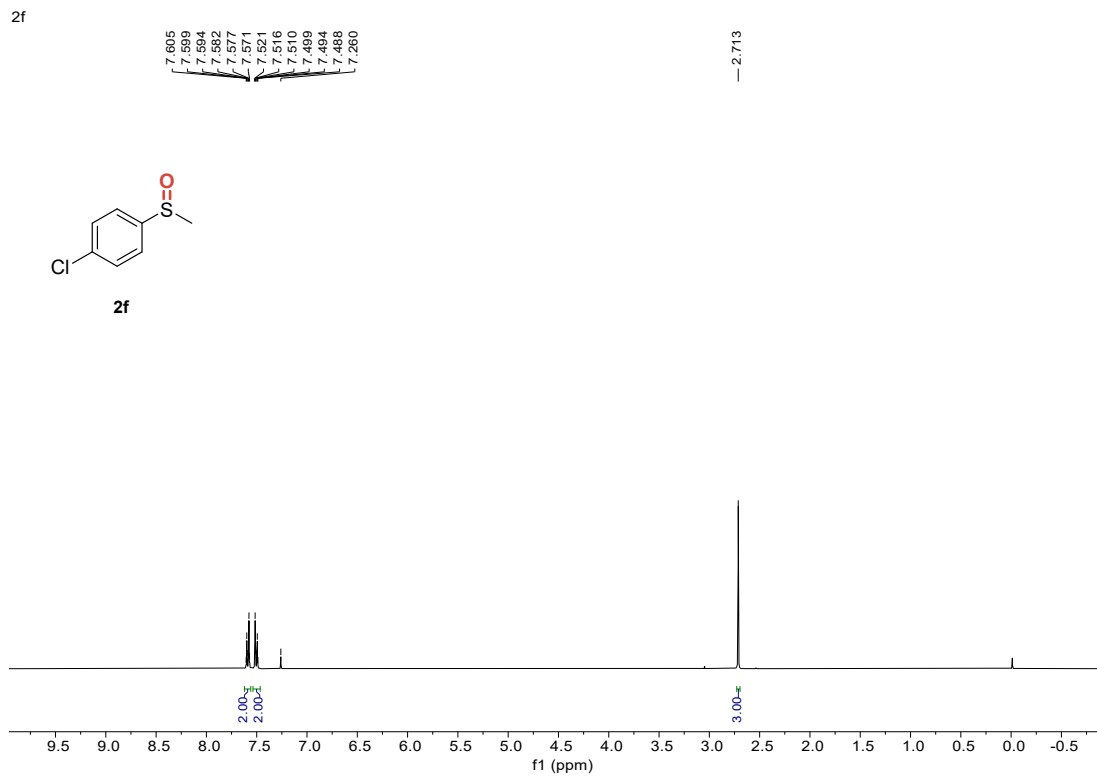

**Fig. S22**  $^1\text{H}$  NMR spectrum (400 MHz,  $\text{CDCl}_3$ ) of **2f**.

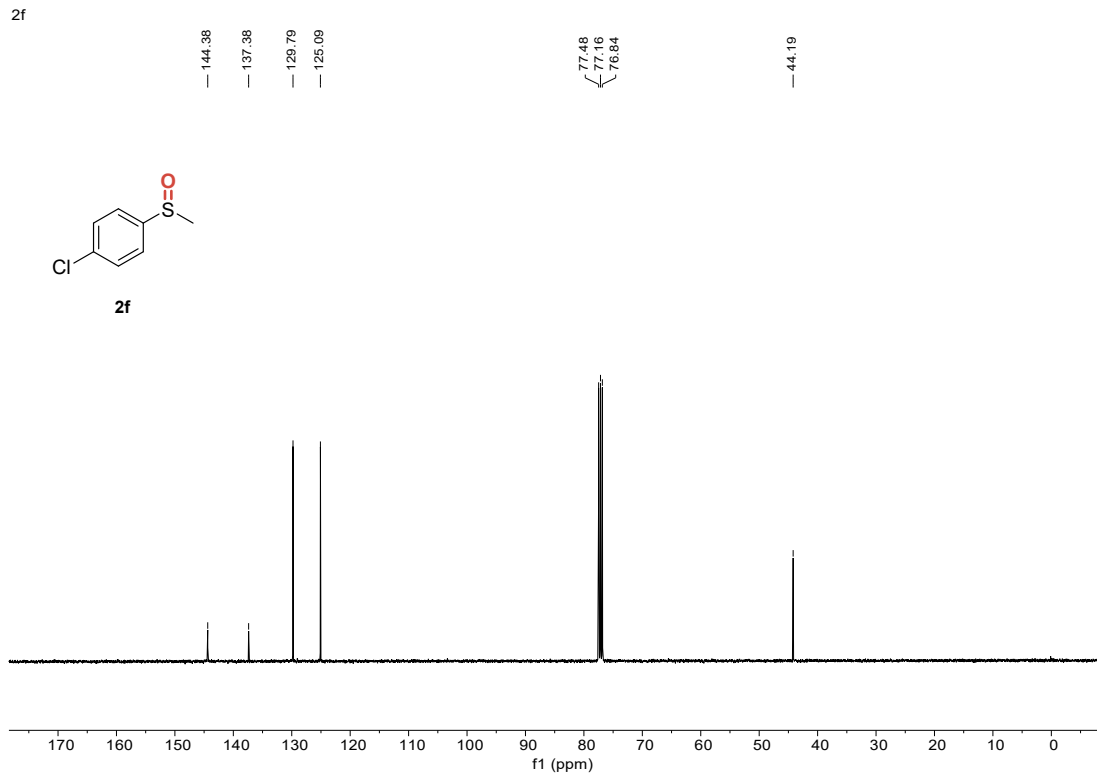

**Fig. S23**  $^{13}\text{C}$  NMR spectrum (101 MHz,  $\text{CDCl}_3$ ) of **2f**.

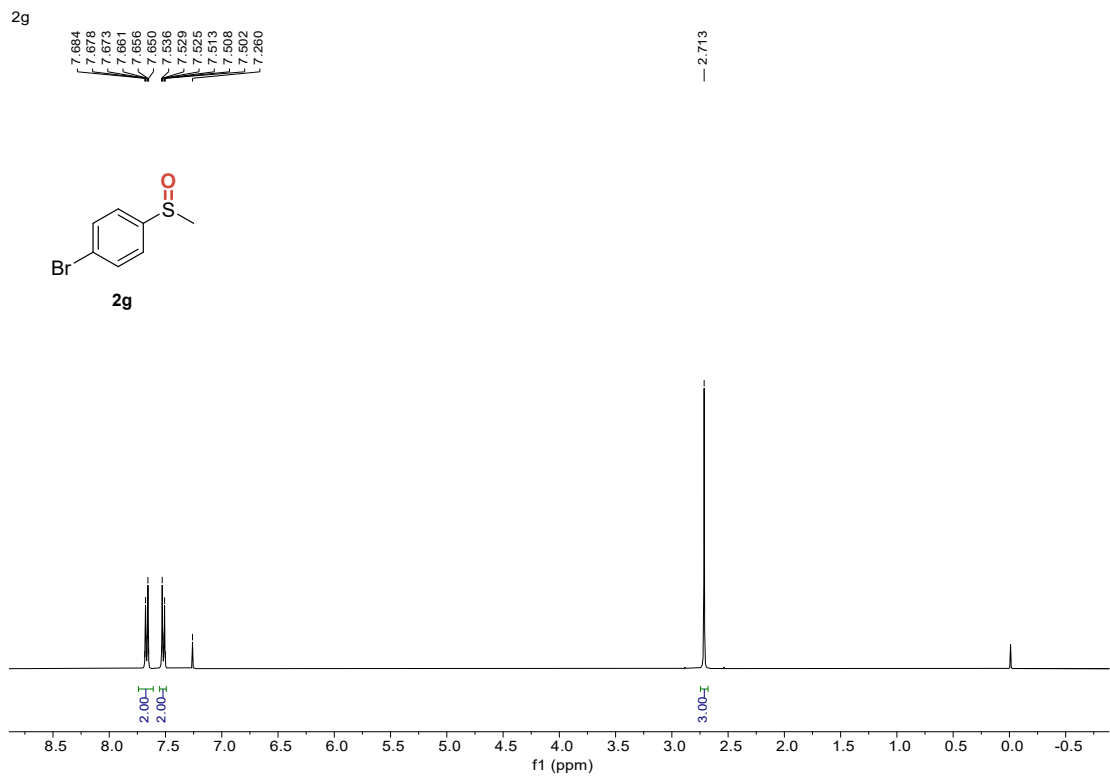

Fig. S24  $^1\text{H}$  NMR spectrum (400 MHz,  $\text{CDCl}_3$ ) of **2g**.

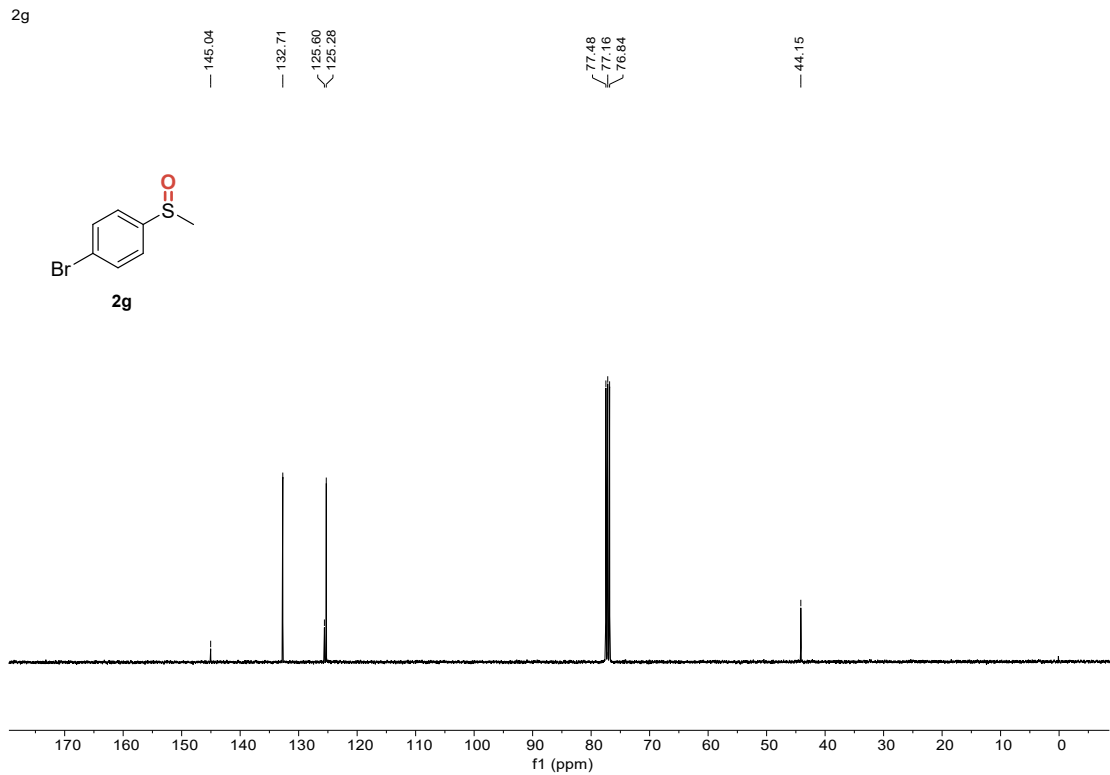

Fig. S25  $^{13}\text{C}$  NMR spectrum (101 MHz,  $\text{CDCl}_3$ ) of **2g**.

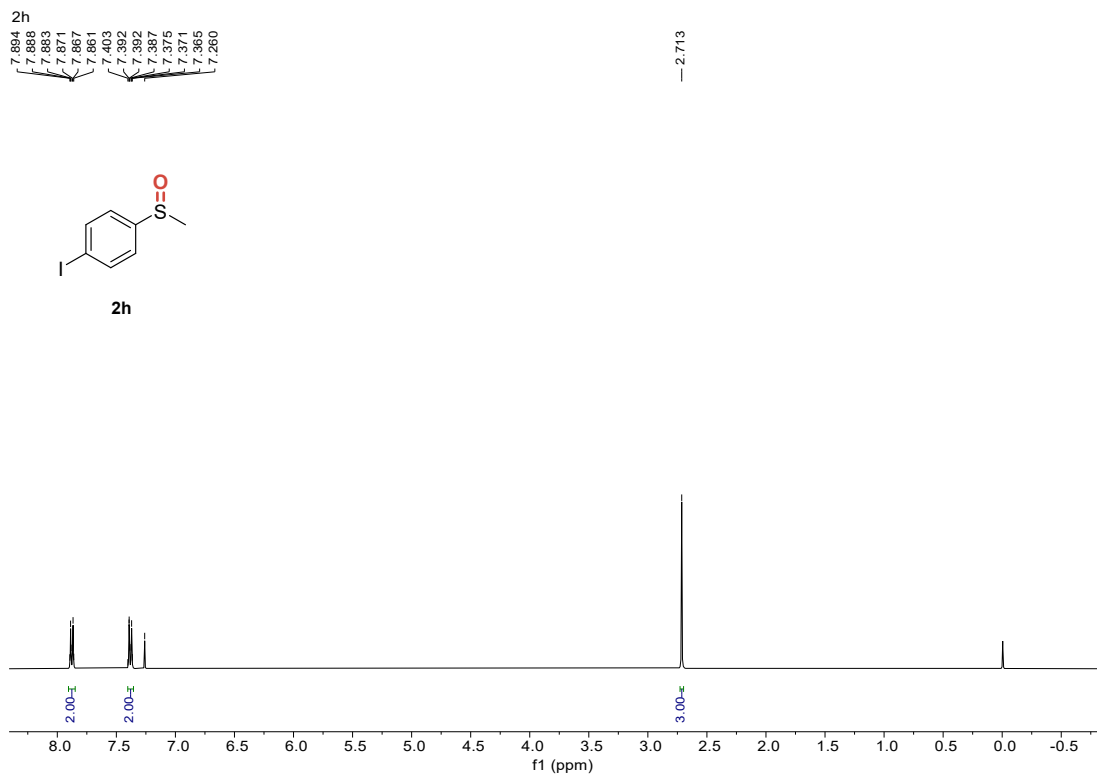

Fig. S26 <sup>1</sup>H NMR spectrum (400 MHz, CDCl<sub>3</sub>) of 2h.

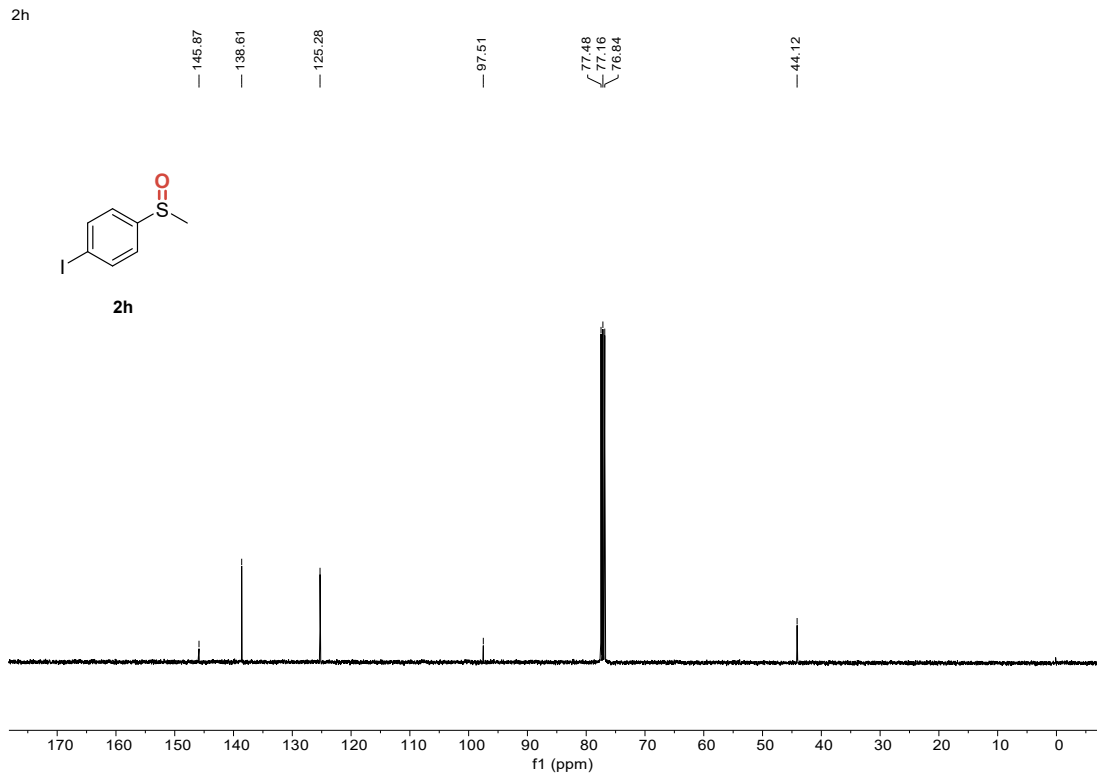

Fig. S27 <sup>13</sup>C NMR spectrum (101 MHz, CDCl<sub>3</sub>) of 2h.

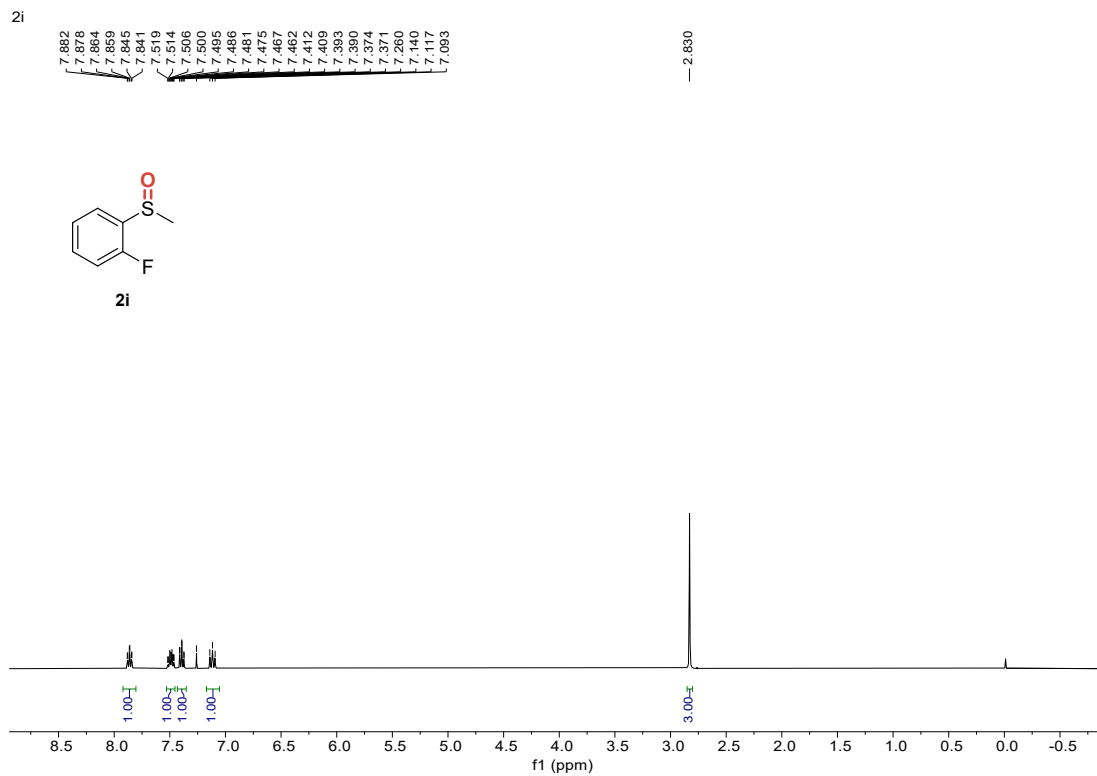

**Fig. S28**  $^1\text{H}$  NMR spectrum (400 MHz,  $\text{CDCl}_3$ ) of **2i**.

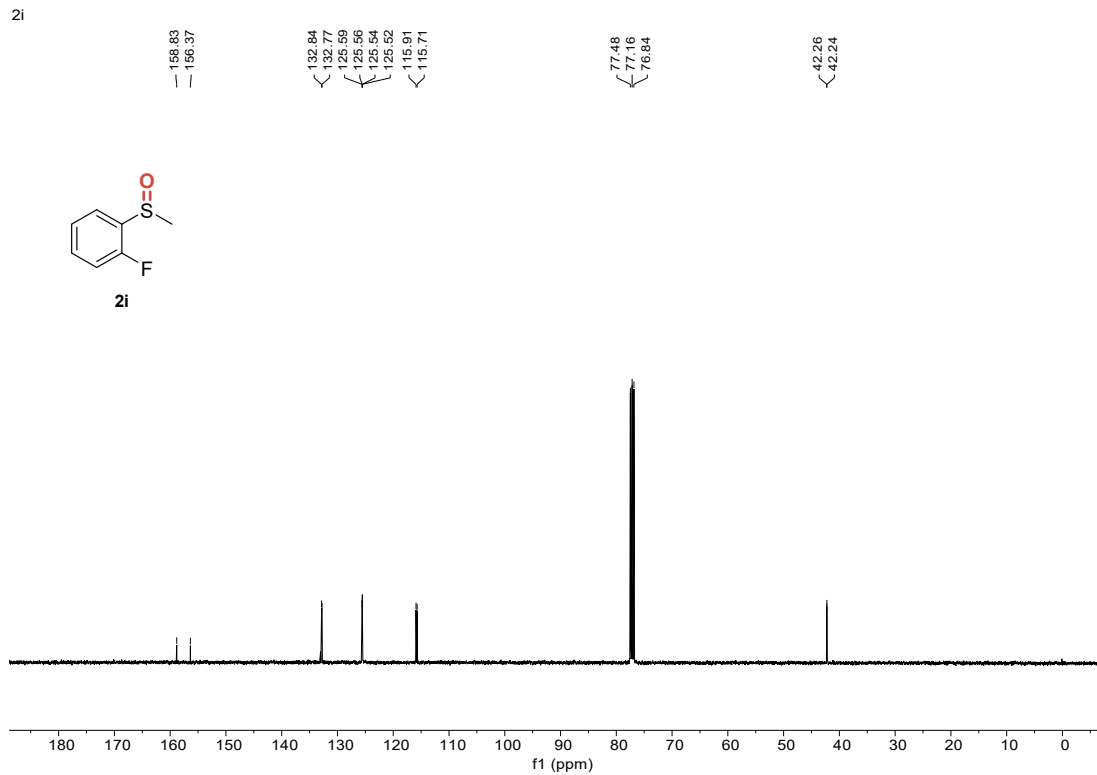

**Fig. S29**  $^{13}\text{C}$  NMR spectrum (101 MHz,  $\text{CDCl}_3$ ) of **2i**.

2i

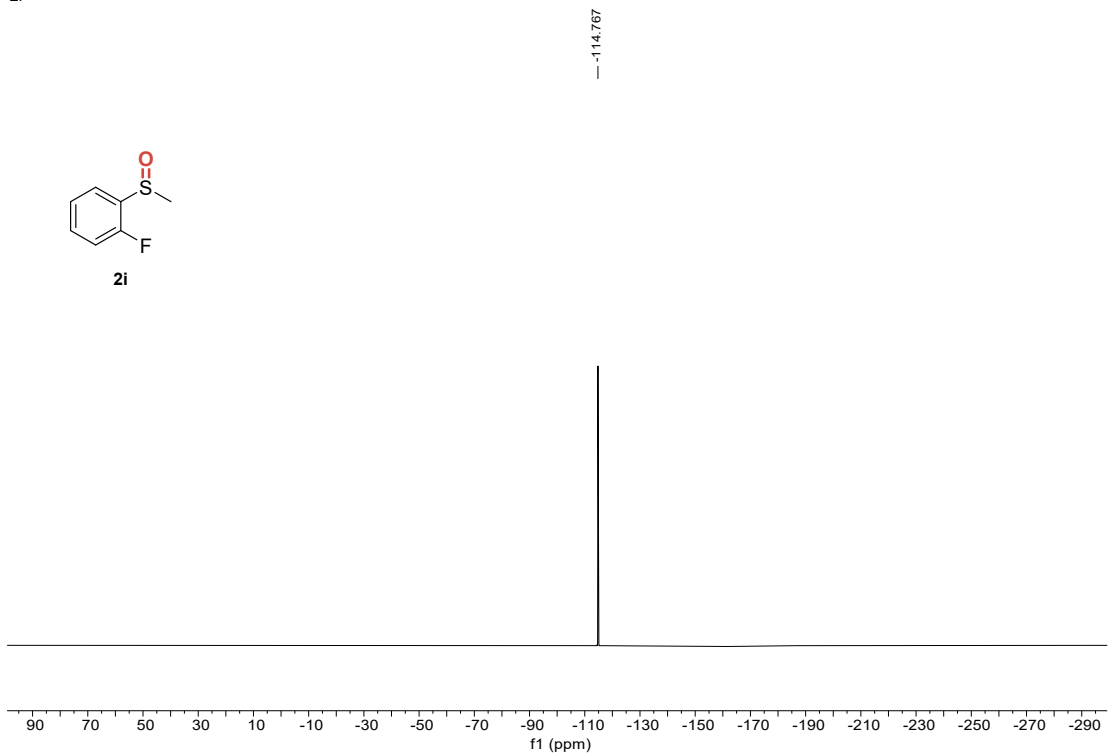

Fig. S30 <sup>19</sup>F NMR spectrum (471 MHz, CDCl<sub>3</sub>) of 2i.

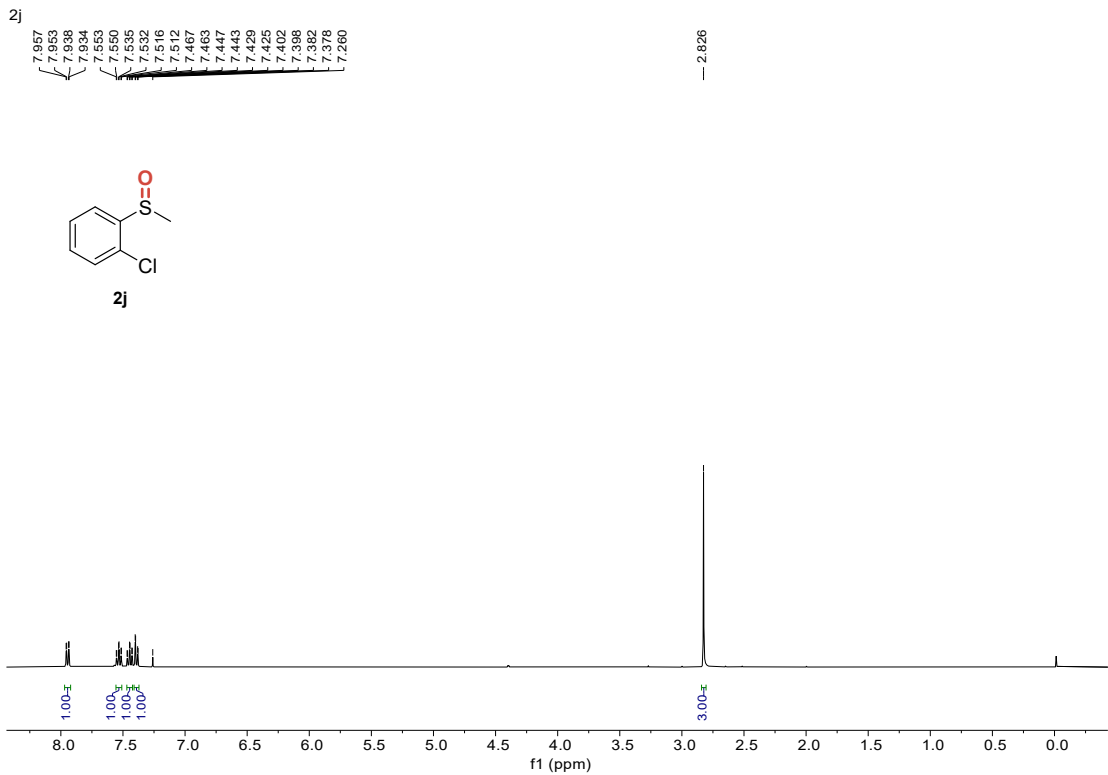

Fig. S31 <sup>1</sup>H NMR spectrum (400 MHz, CDCl<sub>3</sub>) of 2j.



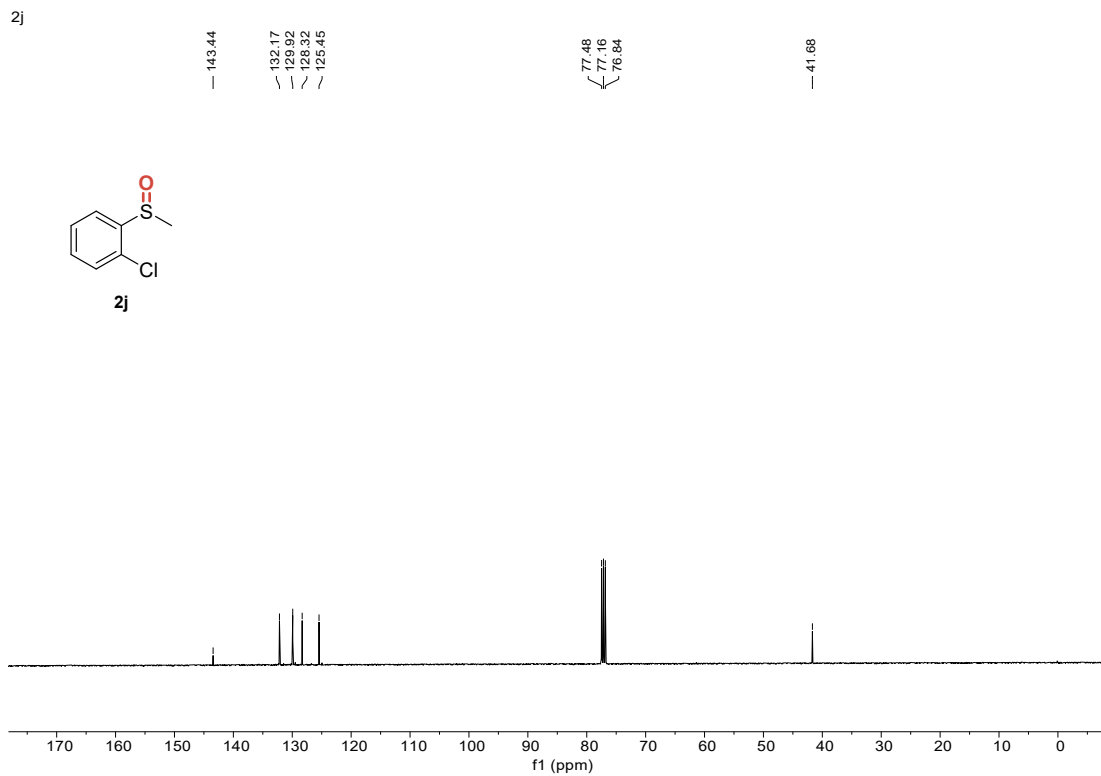

**Fig. S32**  $^{13}\text{C}$  NMR spectrum (101 MHz,  $\text{CDCl}_3$ ) of **2j**.

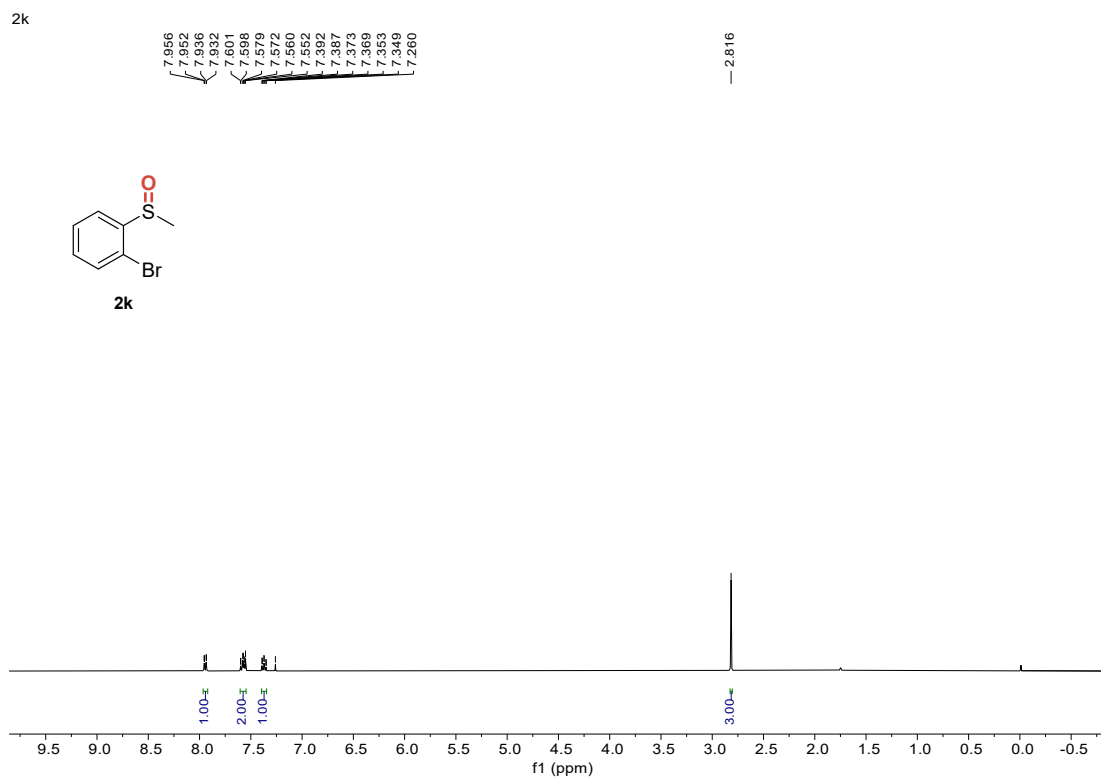

**Fig. S33**  $^1\text{H}$  NMR spectrum (400 MHz,  $\text{CDCl}_3$ ) of **2k**.

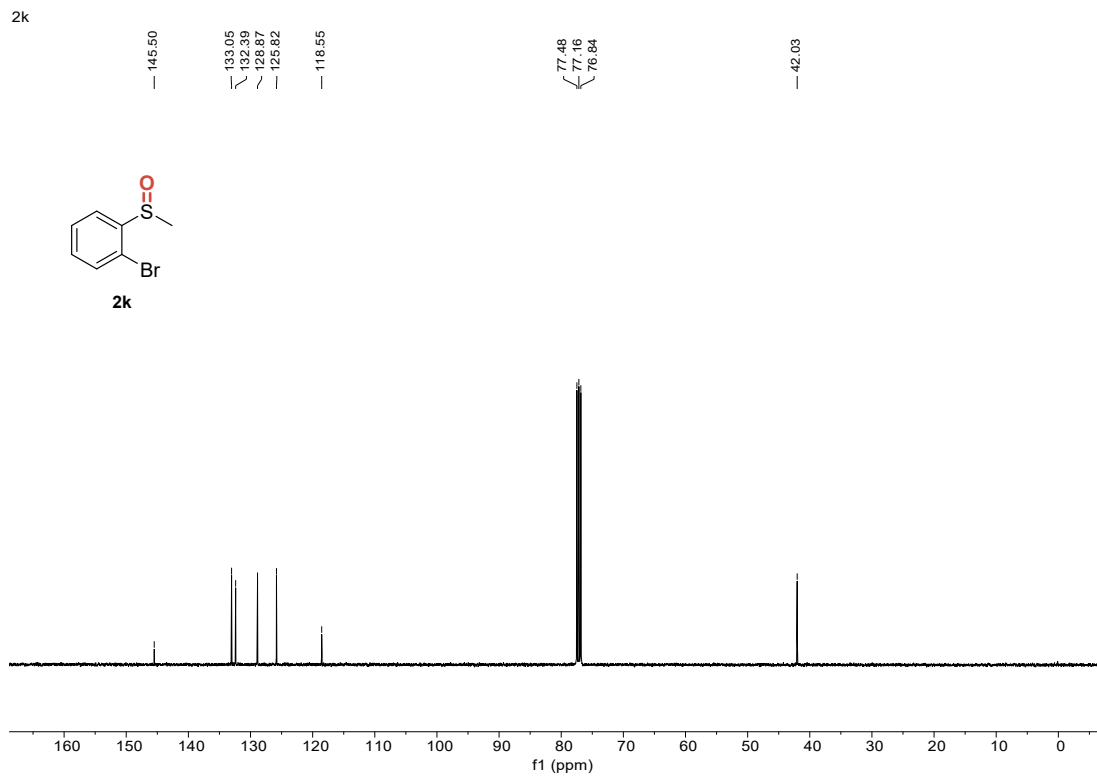

Fig. S34  $^{13}\text{C}$  NMR spectrum (101 MHz,  $\text{CDCl}_3$ ) of **2k**.

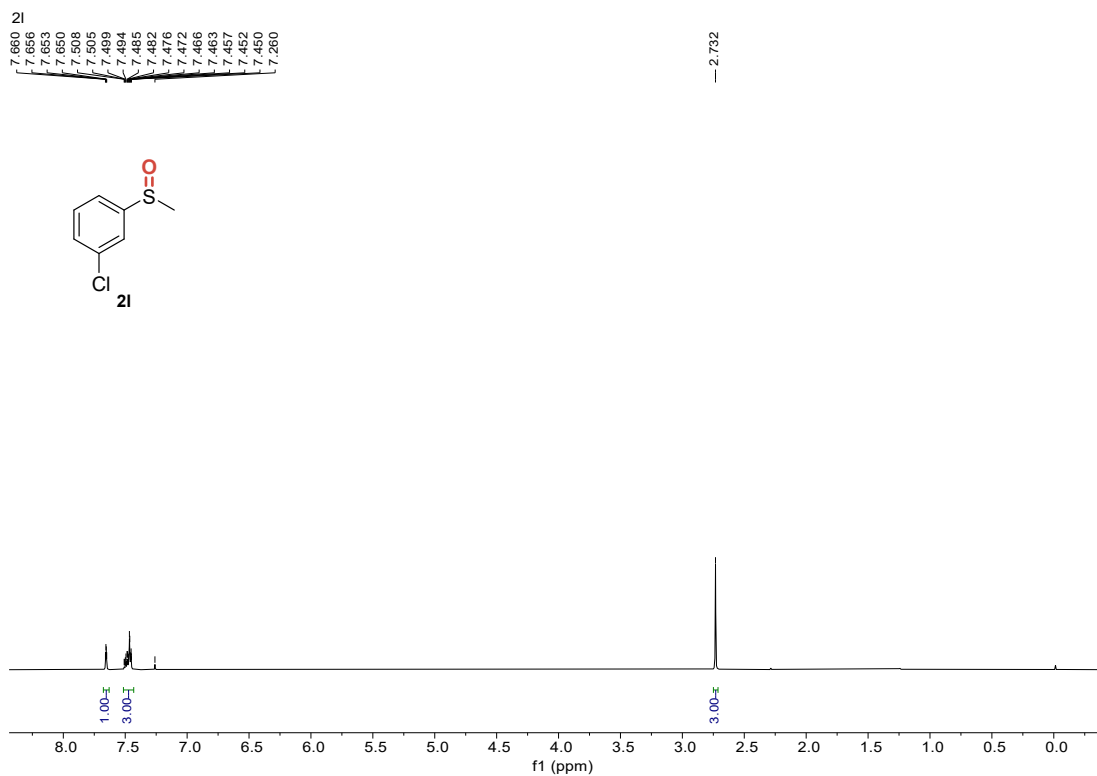

Fig. S35  $^1\text{H}$  NMR spectrum (400 MHz,  $\text{CDCl}_3$ ) of **2l**.

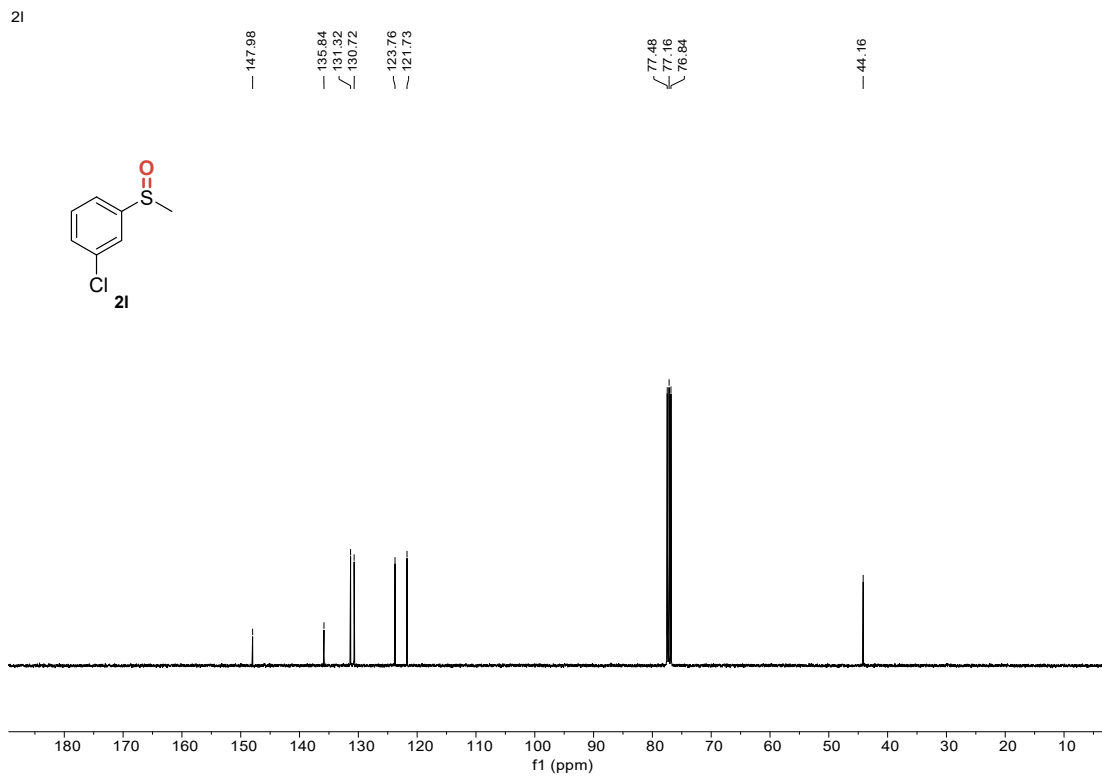

Fig. S36  $^{13}\text{C}$  NMR spectrum (101 MHz,  $\text{CDCl}_3$ ) of 2l.

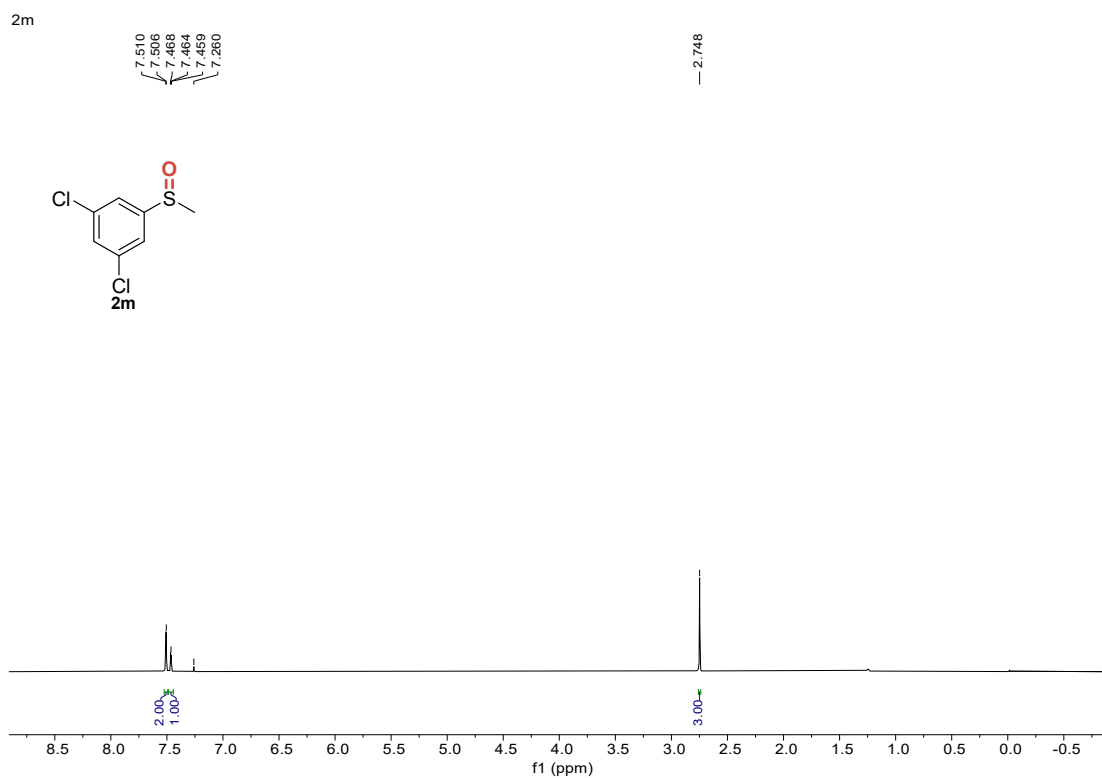

Fig. S37  $^1\text{H}$  NMR spectrum (400 MHz,  $\text{CDCl}_3$ ) of 2m.

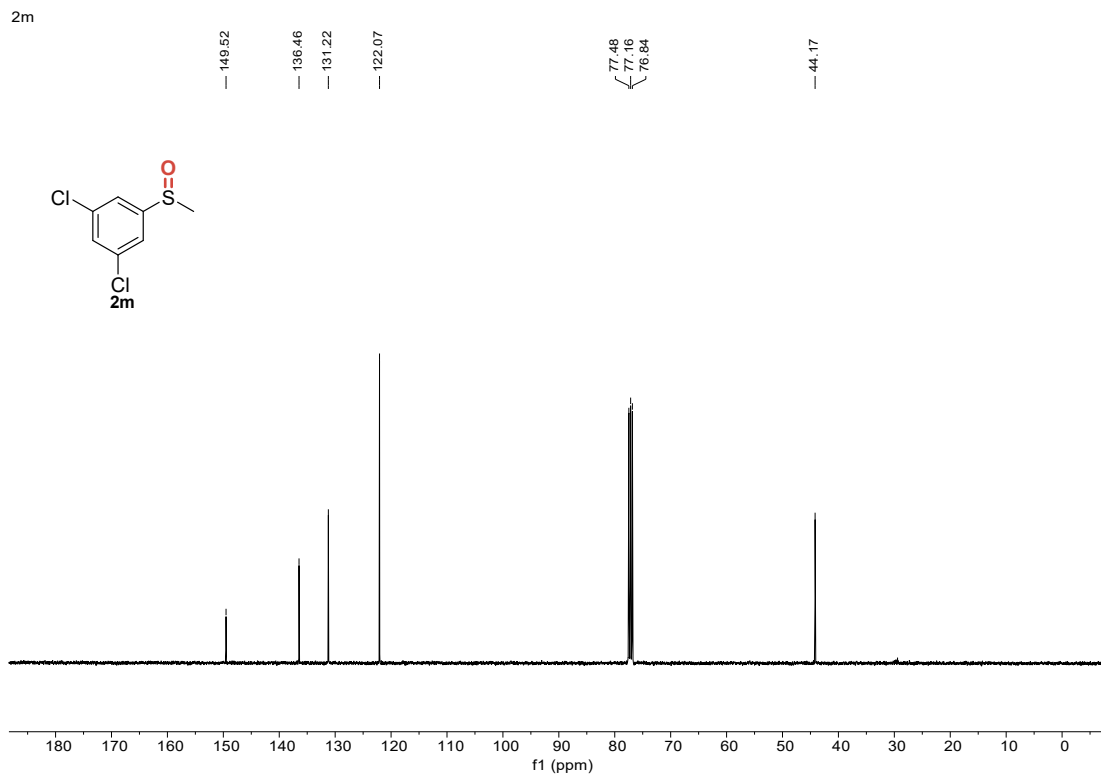

Fig. S38  $^{13}\text{C}$  NMR spectrum (101 MHz,  $\text{CDCl}_3$ ) of **2m**.

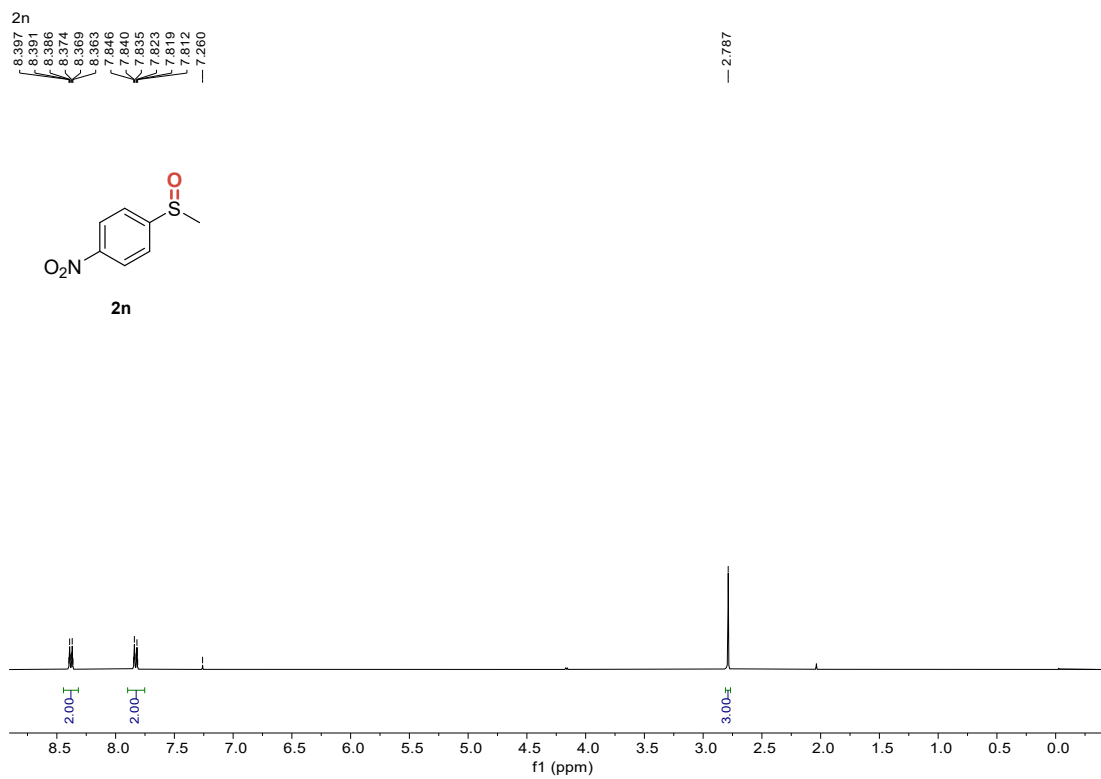

Fig. S39  $^1\text{H}$  NMR spectrum (400 MHz,  $\text{CDCl}_3$ ) of **2n**.

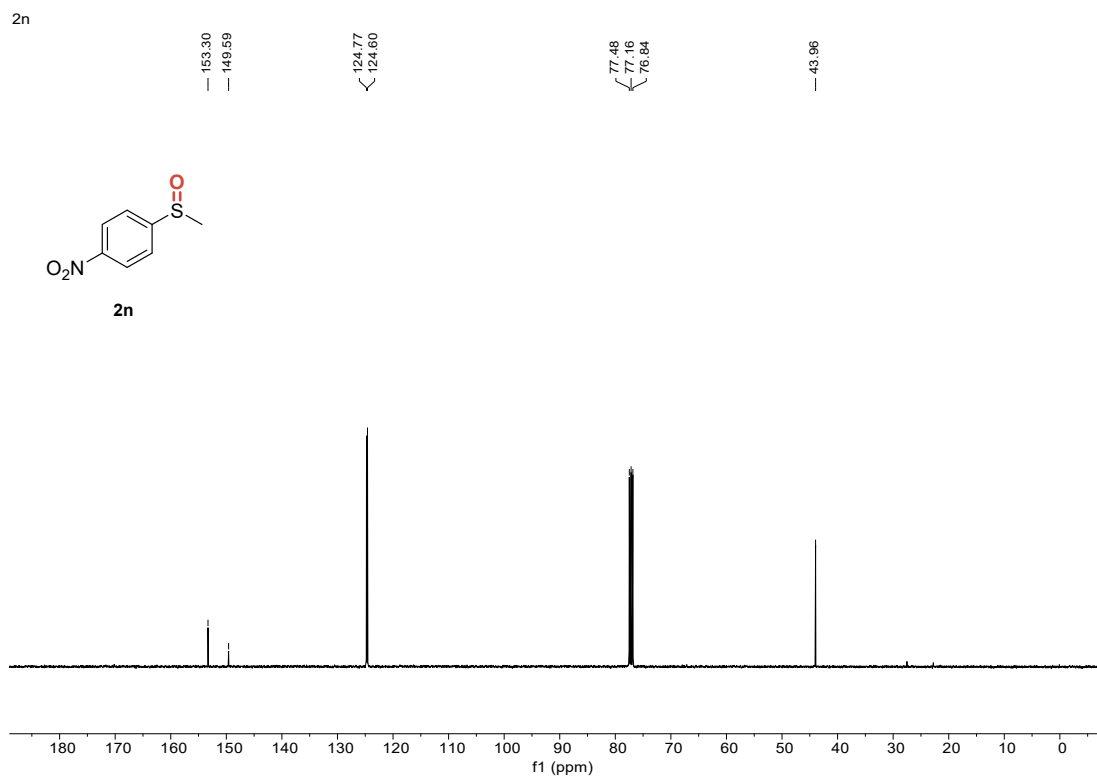

Fig. S40  $^{13}\text{C}$  NMR spectrum (101 MHz,  $\text{CDCl}_3$ ) of **2n**.

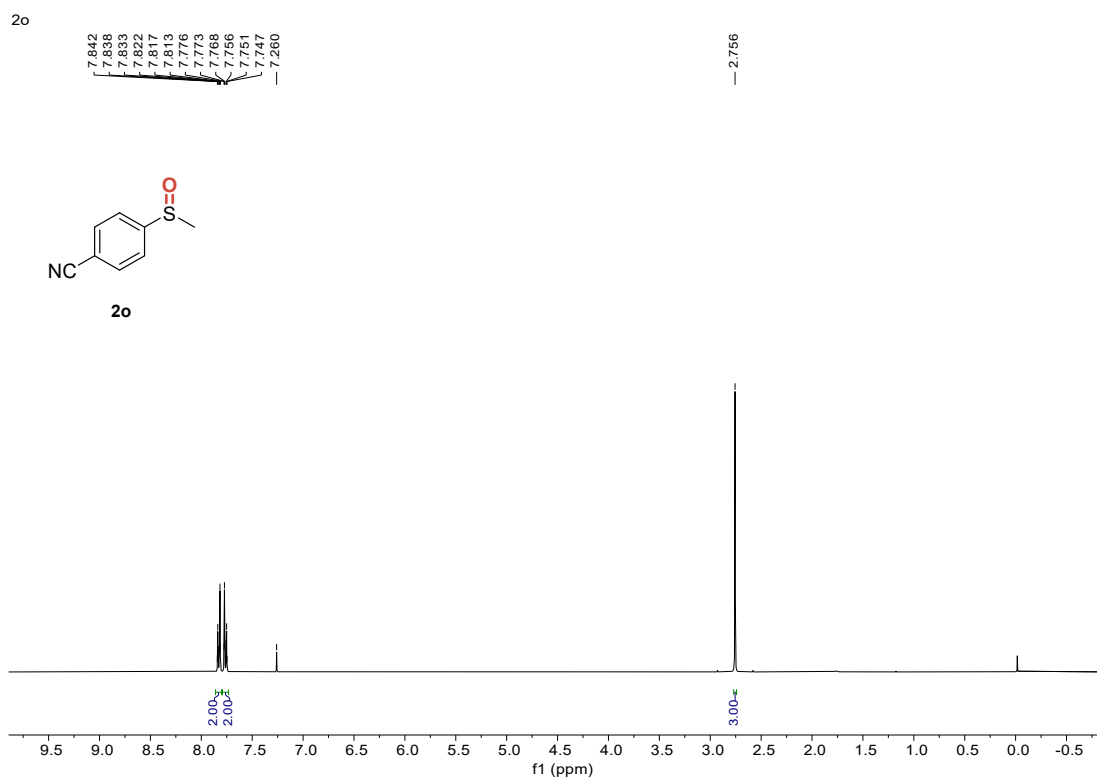

Fig. S41  $^1\text{H}$  NMR spectrum (400 MHz,  $\text{CDCl}_3$ ) of **2o**.

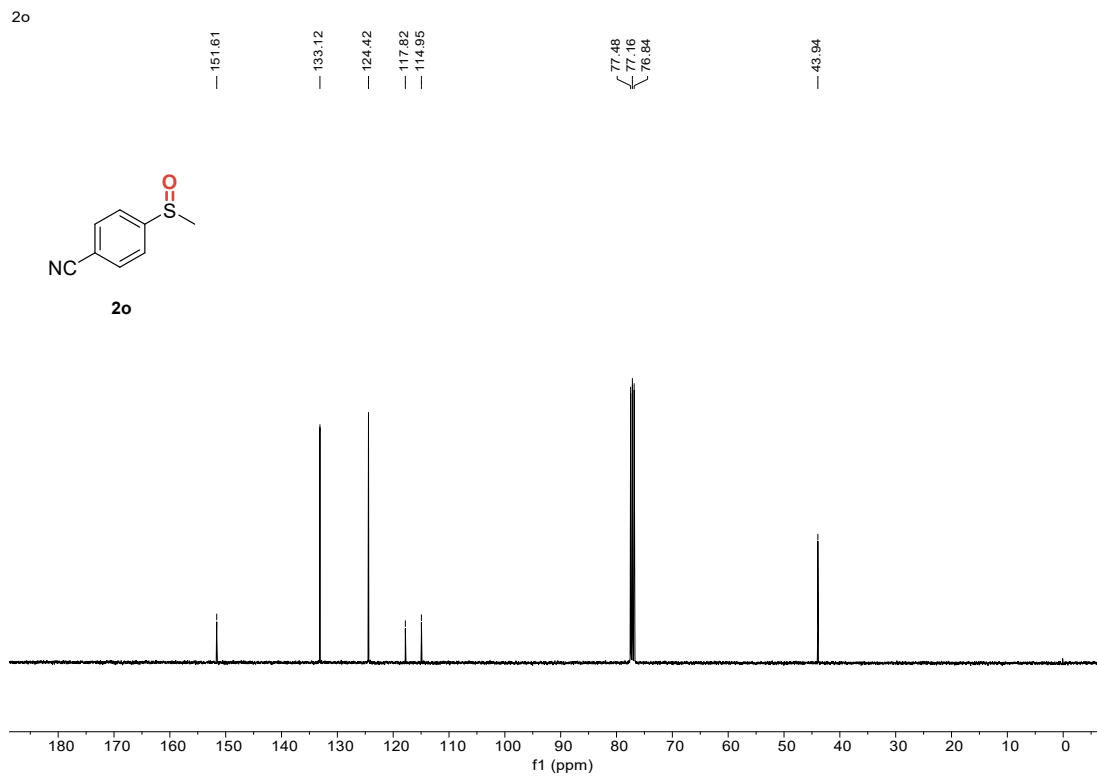

Fig. S42  $^{13}\text{C}$  NMR spectrum (101 MHz,  $\text{CDCl}_3$ ) of **2o**.

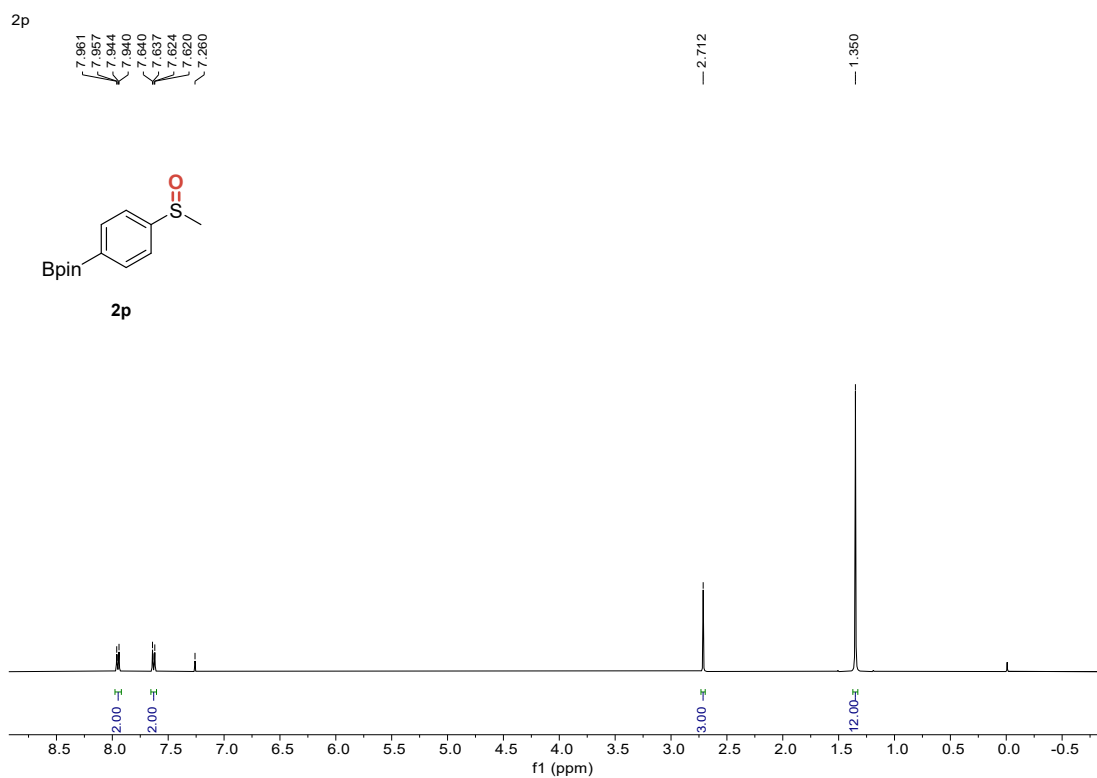

Fig. S43  $^1\text{H}$  NMR spectrum (400 MHz,  $\text{CDCl}_3$ ) of **2p**.

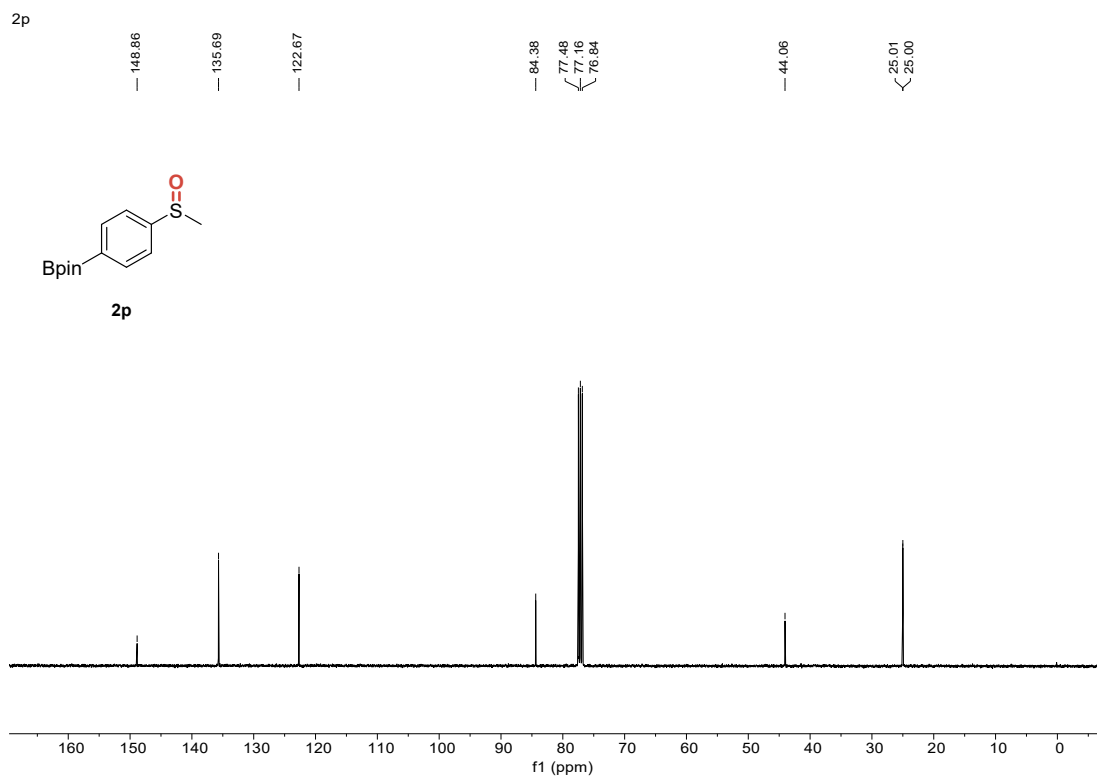

Fig. S44  $^{13}\text{C}$  NMR spectrum (101 MHz,  $\text{CDCl}_3$ ) of **2p**.

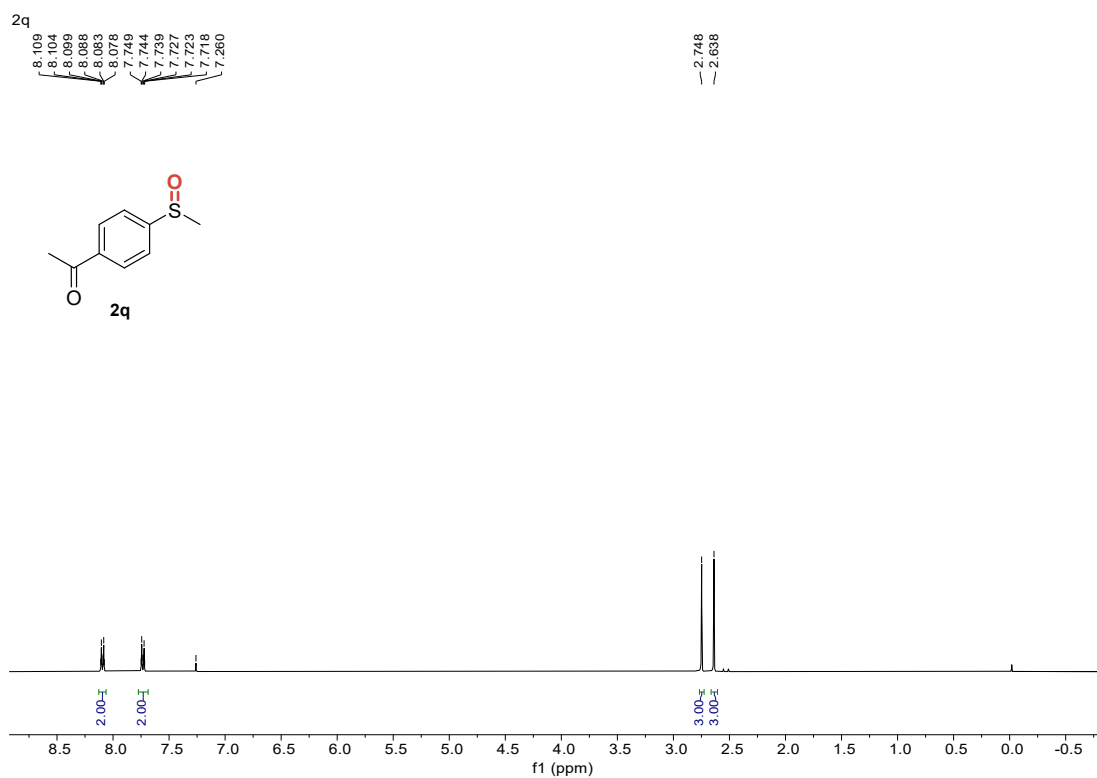

Fig. S45  $^1\text{H}$  NMR spectrum (400 MHz,  $\text{CDCl}_3$ ) of **2q**.

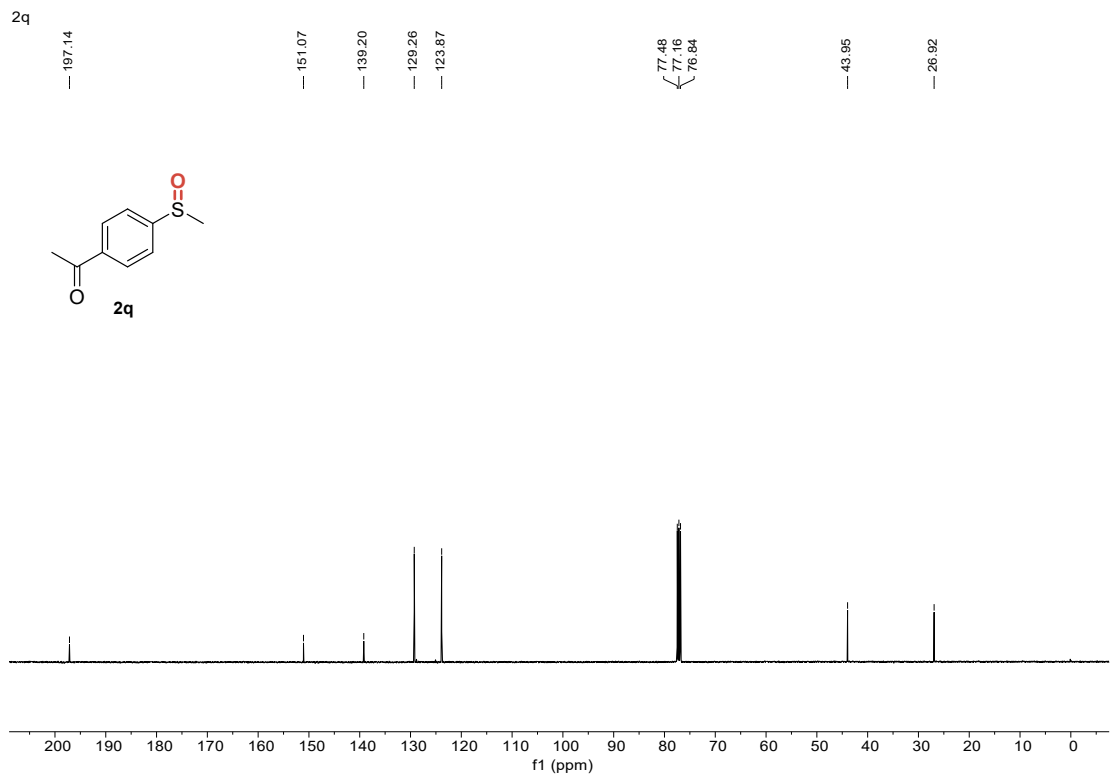

Fig. S46 <sup>13</sup>C NMR spectrum (101 MHz, CDCl<sub>3</sub>) of 2q.

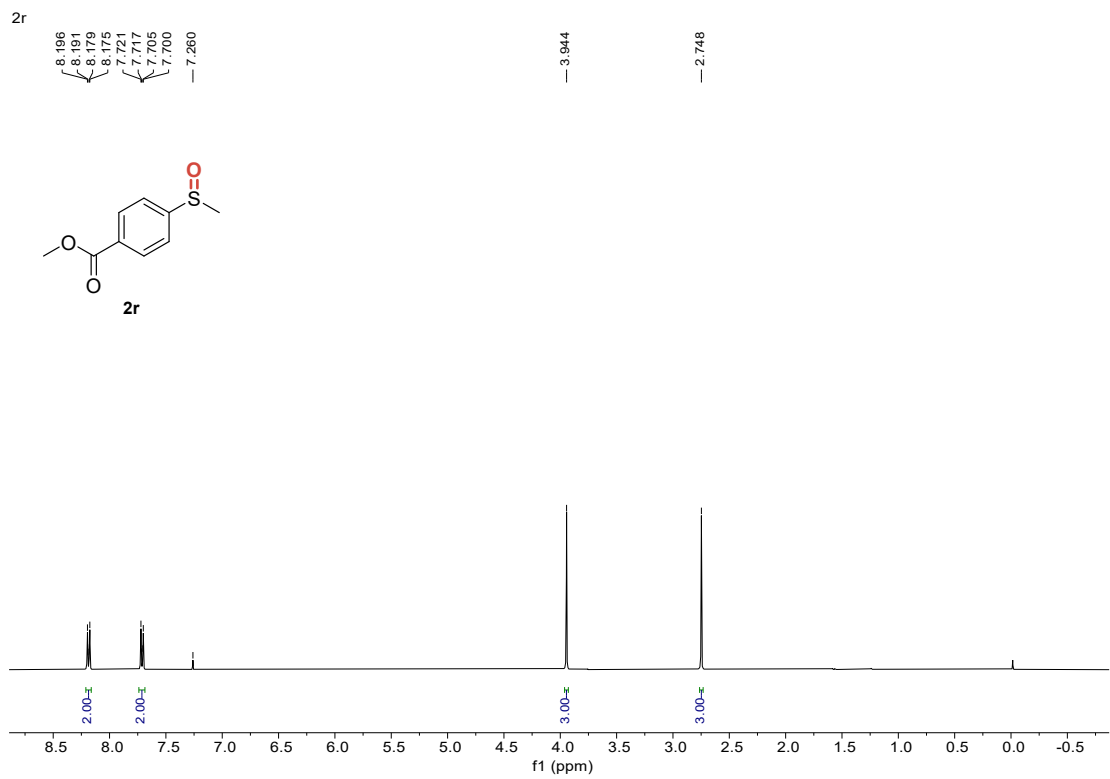

Fig. S47 <sup>1</sup>H NMR spectrum (400 MHz, CDCl<sub>3</sub>) of 2r.



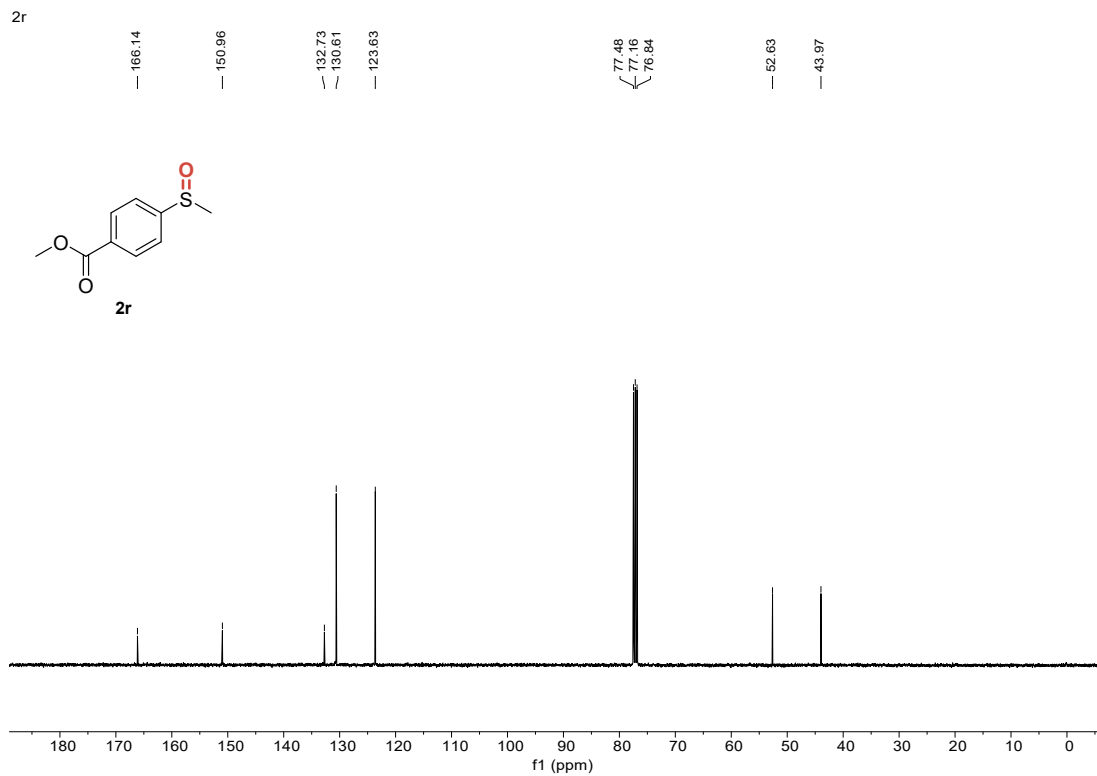

Fig. S48  $^{13}\text{C}$  NMR spectrum (101 MHz,  $\text{CDCl}_3$ ) of **2r**.

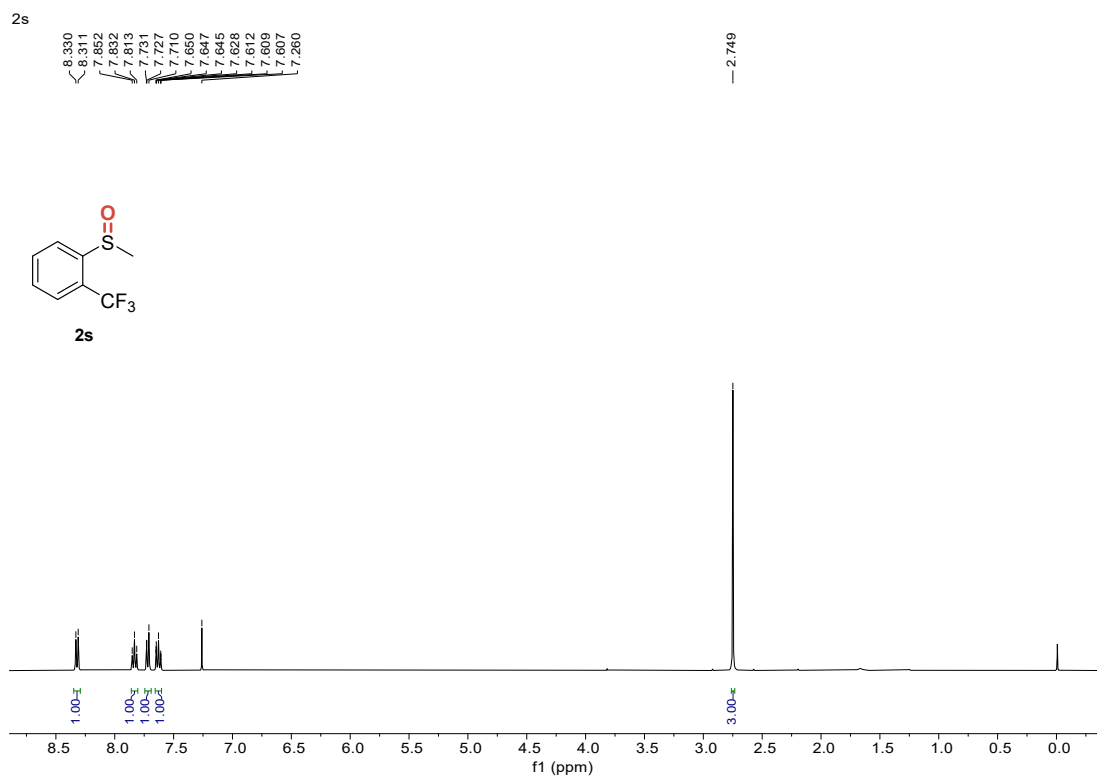

Fig. S49  $^1\text{H}$  NMR spectrum (400 MHz,  $\text{CDCl}_3$ ) of **2s**.

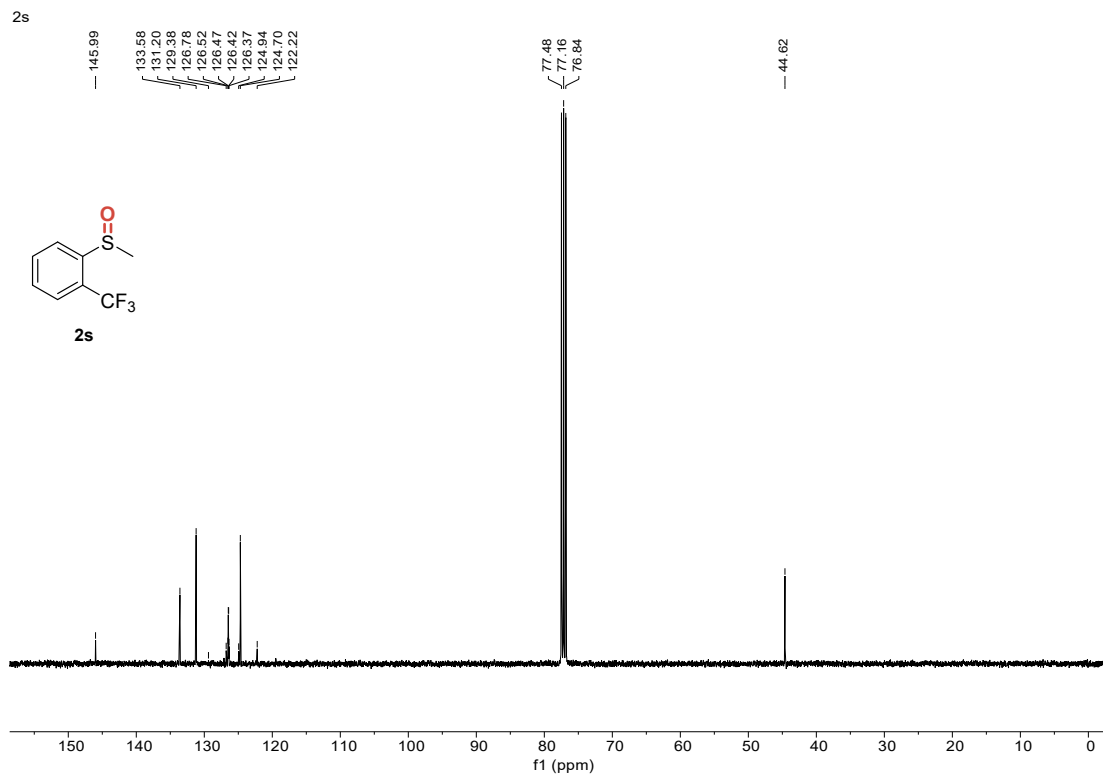

Fig. S50  $^{13}\text{C}$  NMR spectrum (101 MHz,  $\text{CDCl}_3$ ) of **2s**.

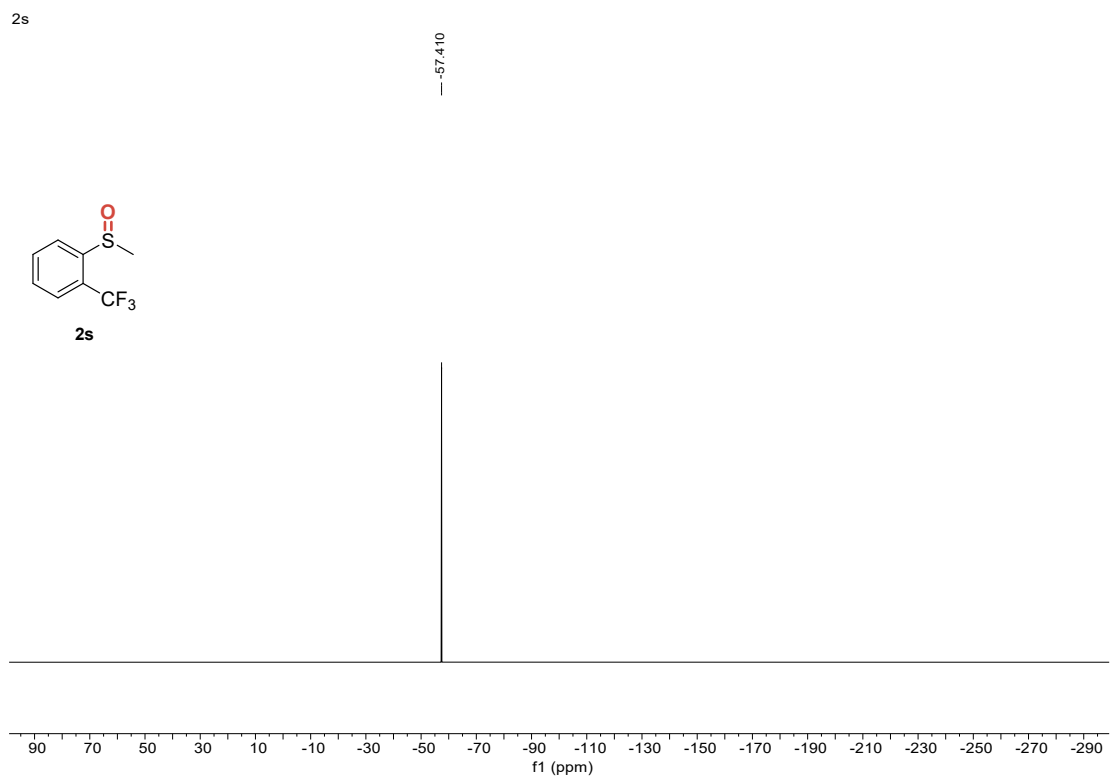

Fig. S51  $^{19}\text{F}$  NMR spectrum (471 MHz,  $\text{CDCl}_3$ ) of **2s**.

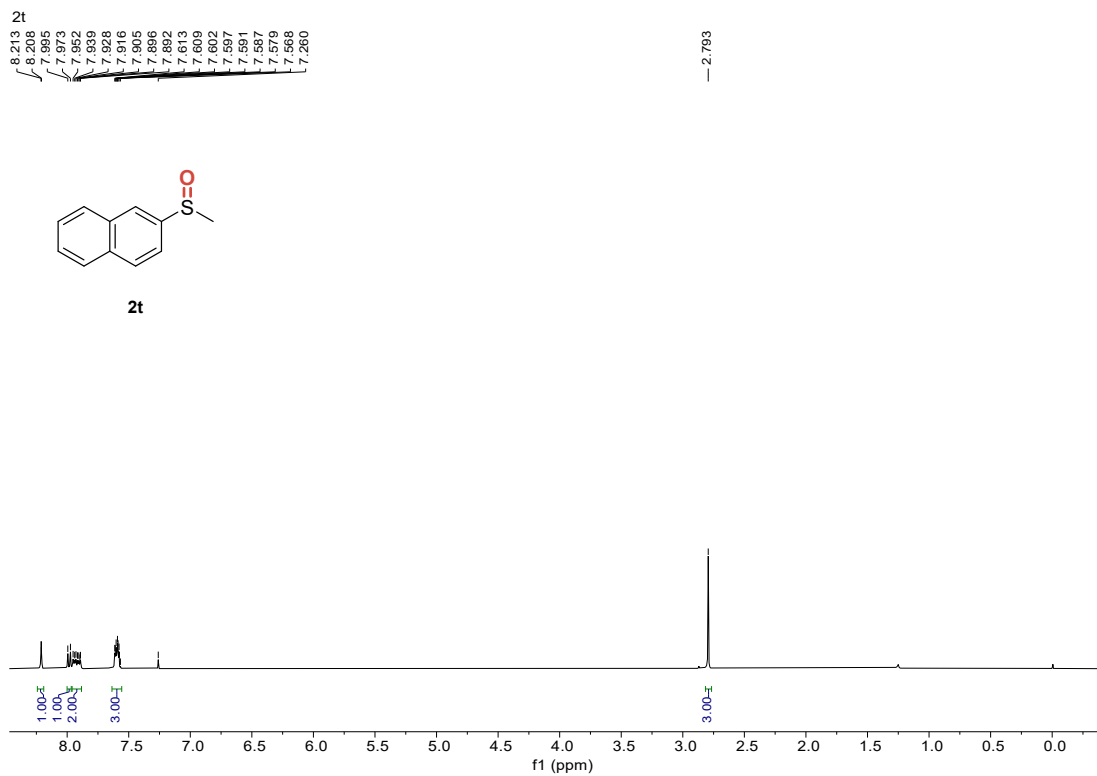

Fig. S52  $^1\text{H}$  NMR spectrum (400 MHz,  $\text{CDCl}_3$ ) of 2t.

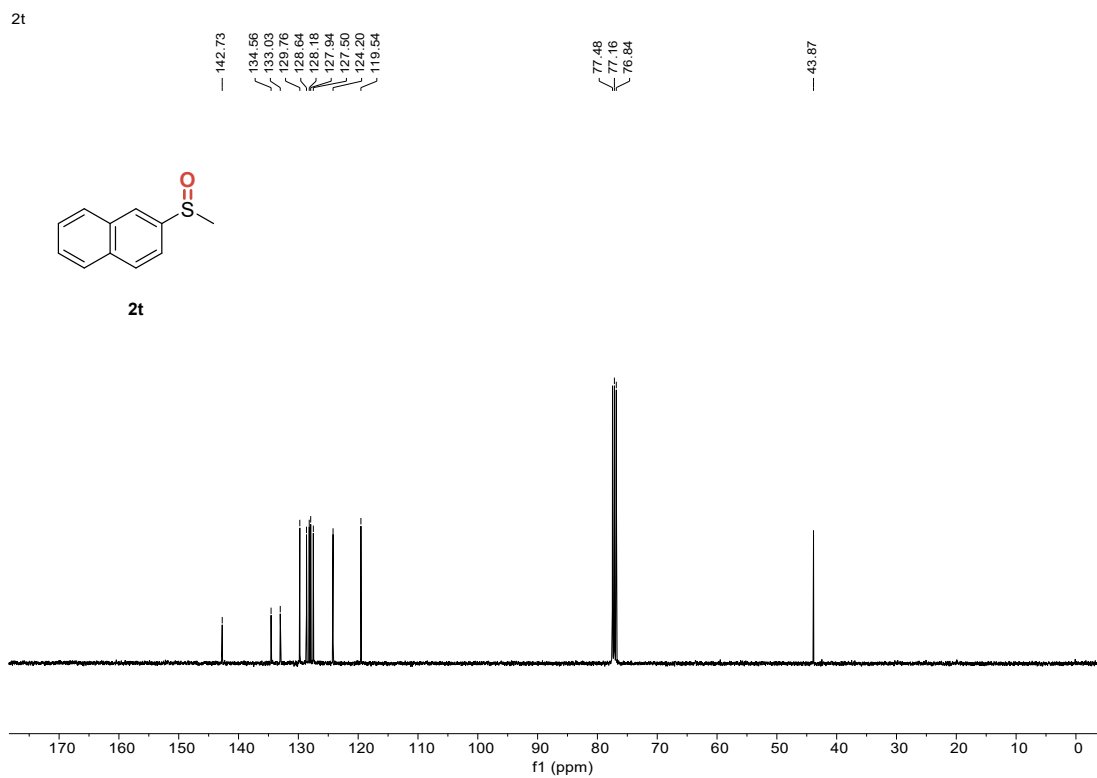

Fig. S53  $^{13}\text{C}$  NMR spectrum (101 MHz,  $\text{CDCl}_3$ ) of 2t.

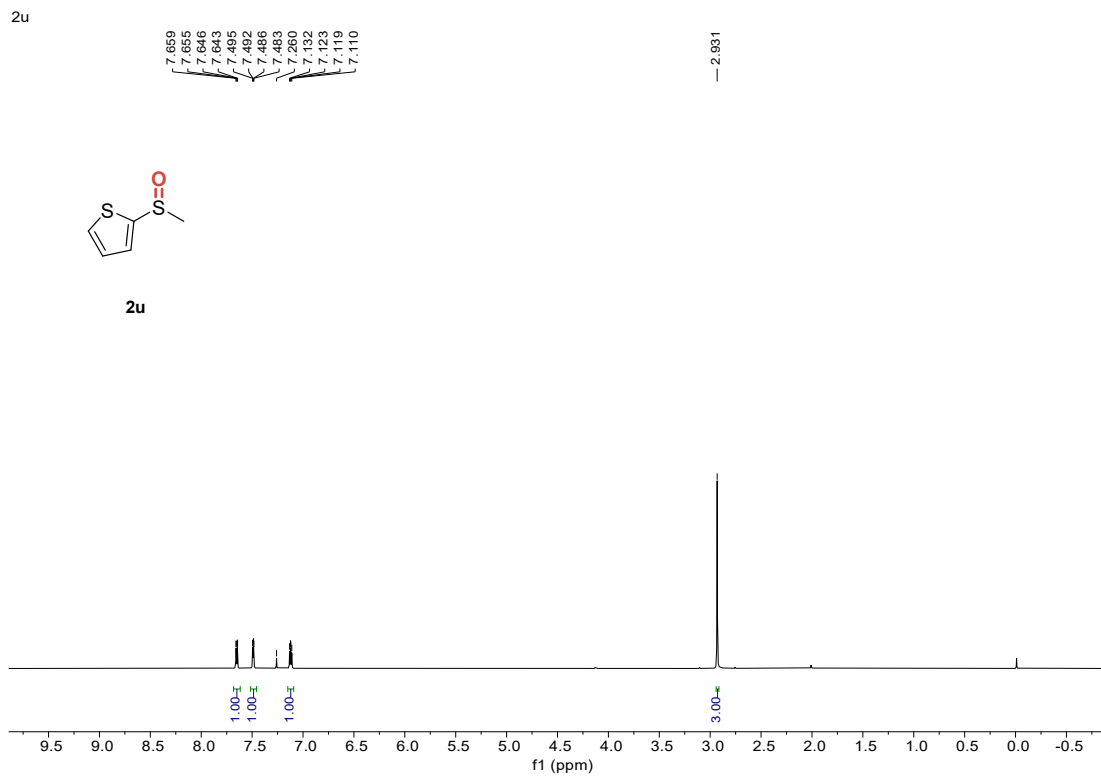

Fig. S54  $^1\text{H}$  NMR spectrum (400 MHz,  $\text{CDCl}_3$ ) of **2u**.

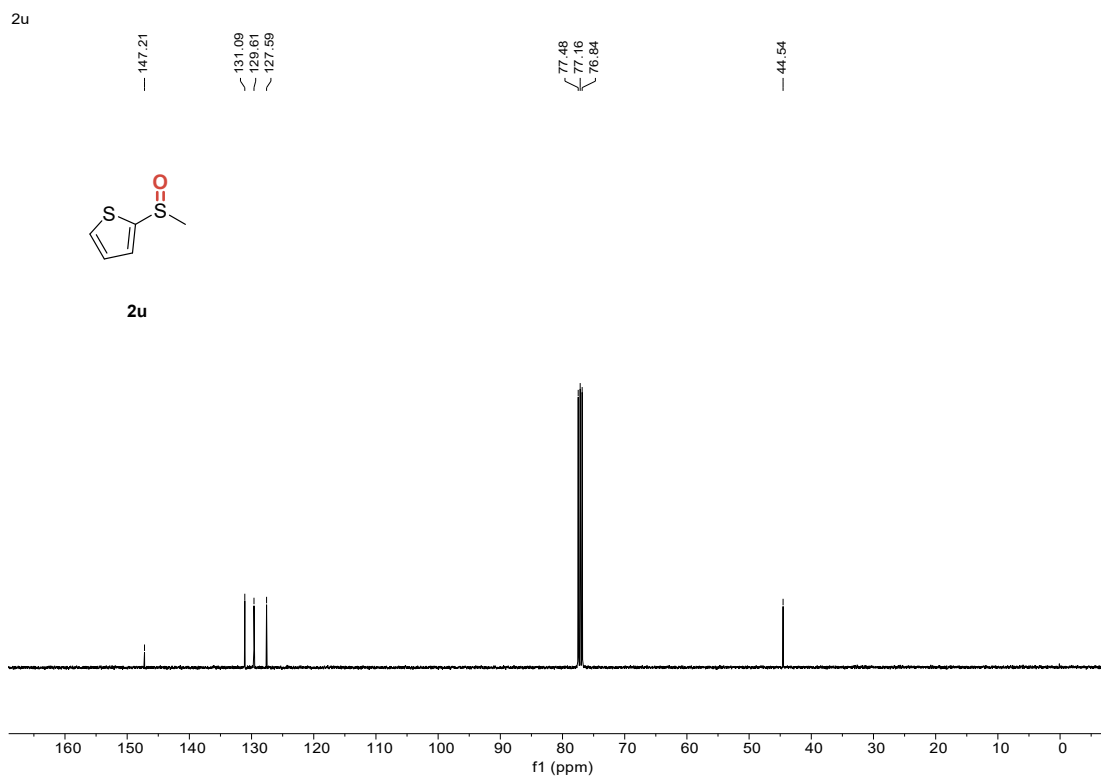

Fig. S55  $^{13}\text{C}$  NMR spectrum (101 MHz,  $\text{CDCl}_3$ ) of **2u**.

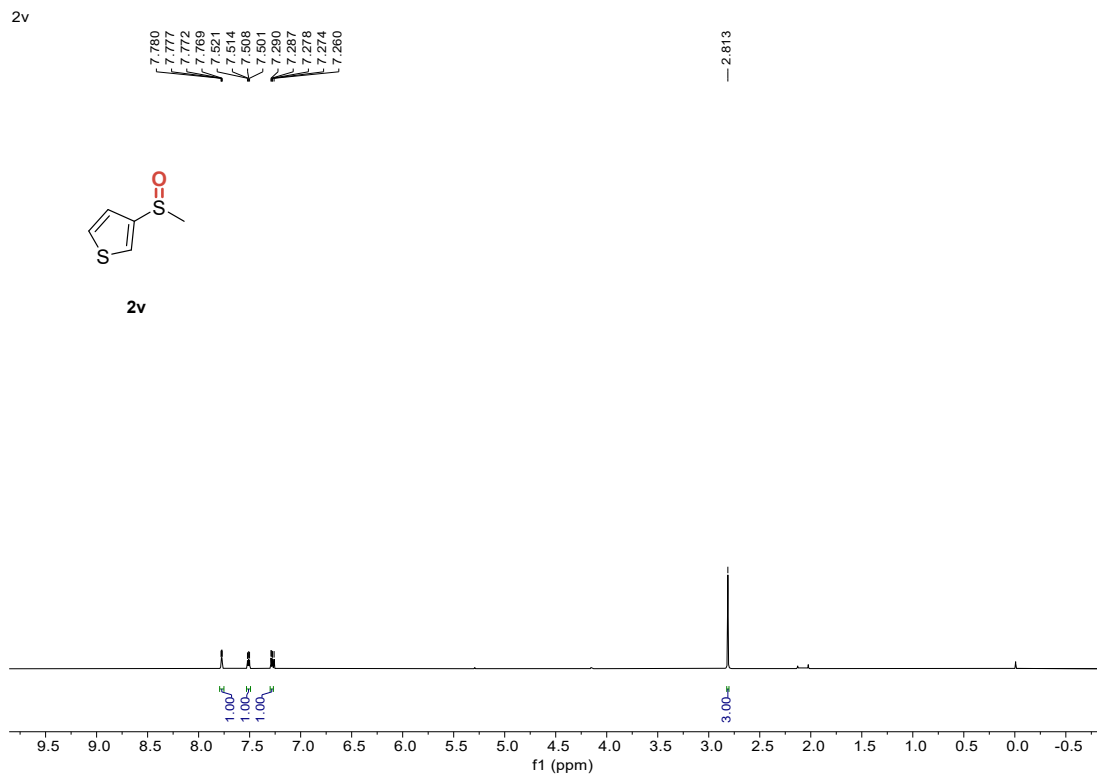

Fig. S56  $^1\text{H}$  NMR spectrum (400 MHz,  $\text{CDCl}_3$ ) of 2v.

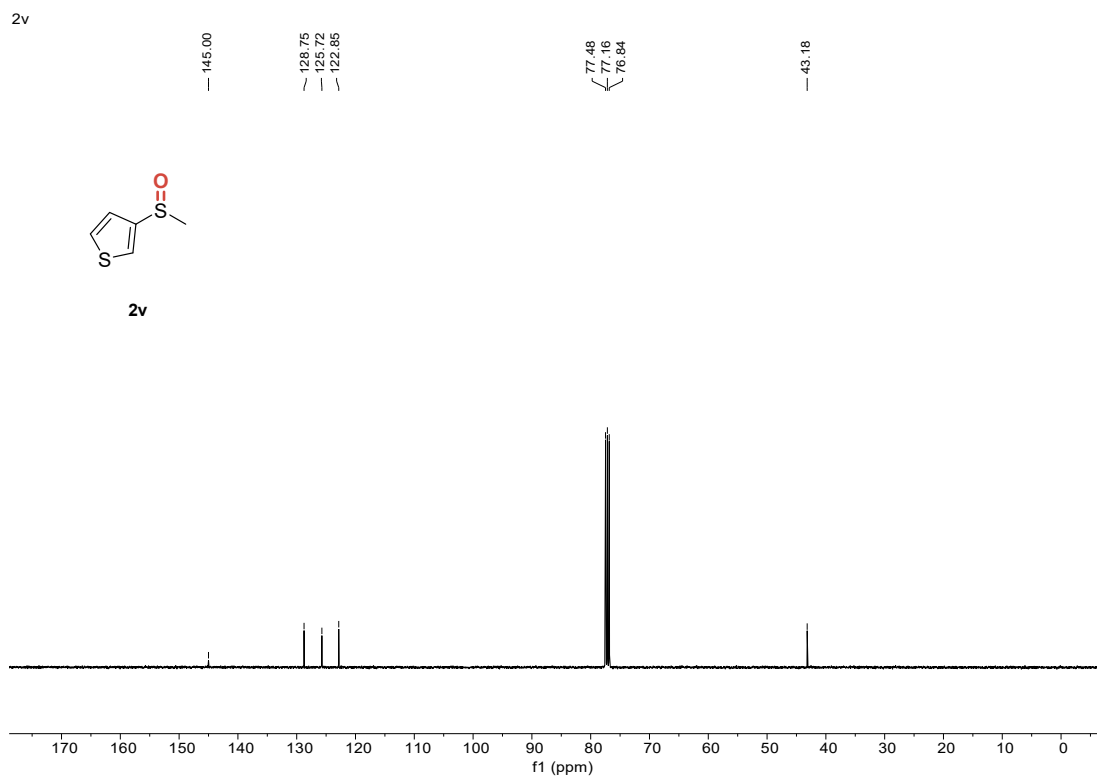

Fig. S57  $^{13}\text{C}$  NMR spectrum (101 MHz,  $\text{CDCl}_3$ ) of 2v.

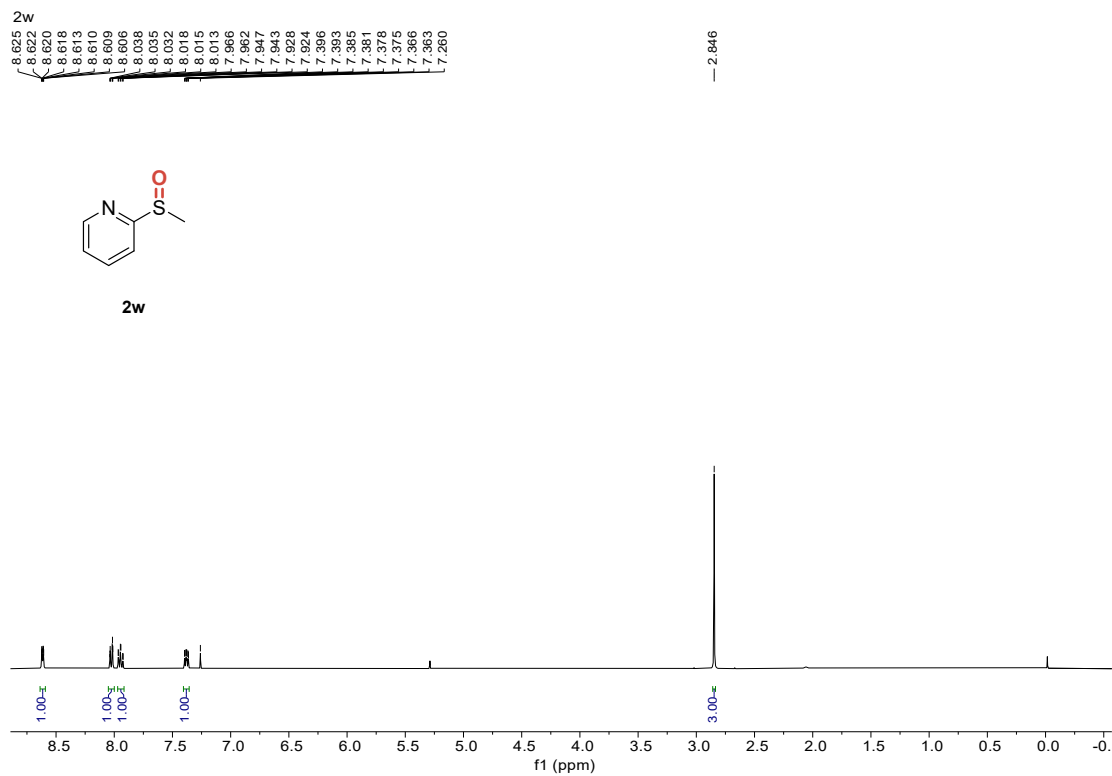

Fig. S58  $^1\text{H}$  NMR spectrum (400 MHz,  $\text{CDCl}_3$ ) of **2w**.

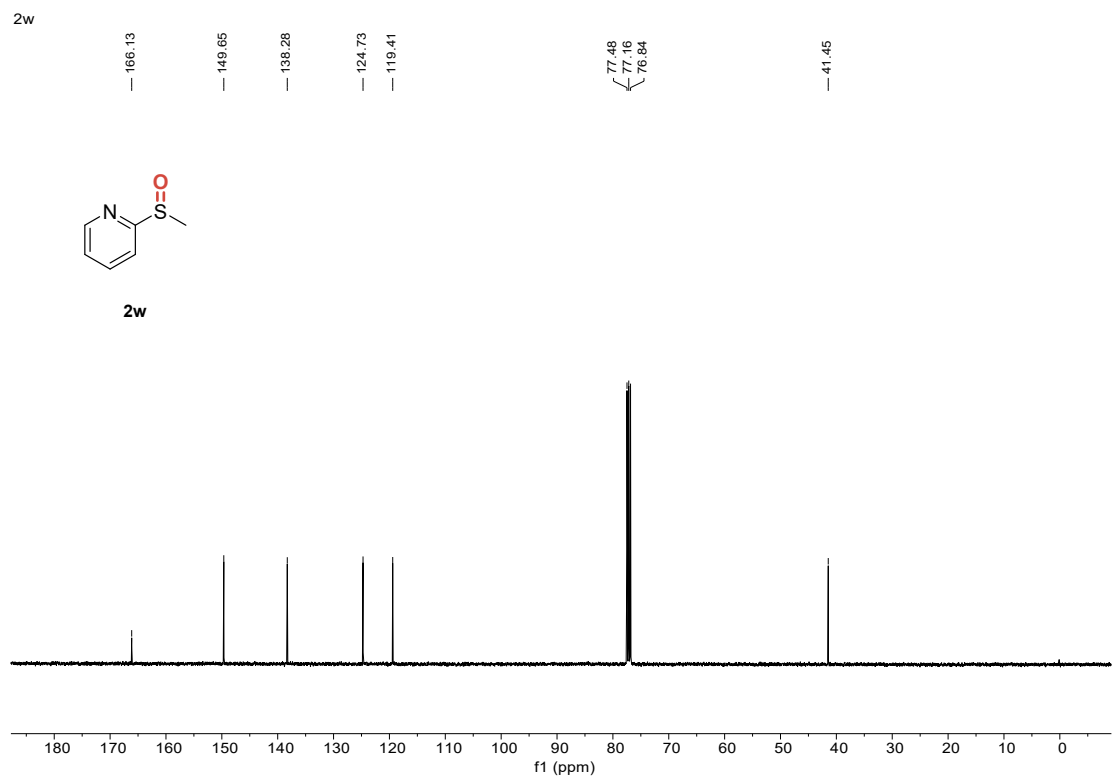

Fig. S59  $^{13}\text{C}$  NMR spectrum (101 MHz,  $\text{CDCl}_3$ ) of **2w**.

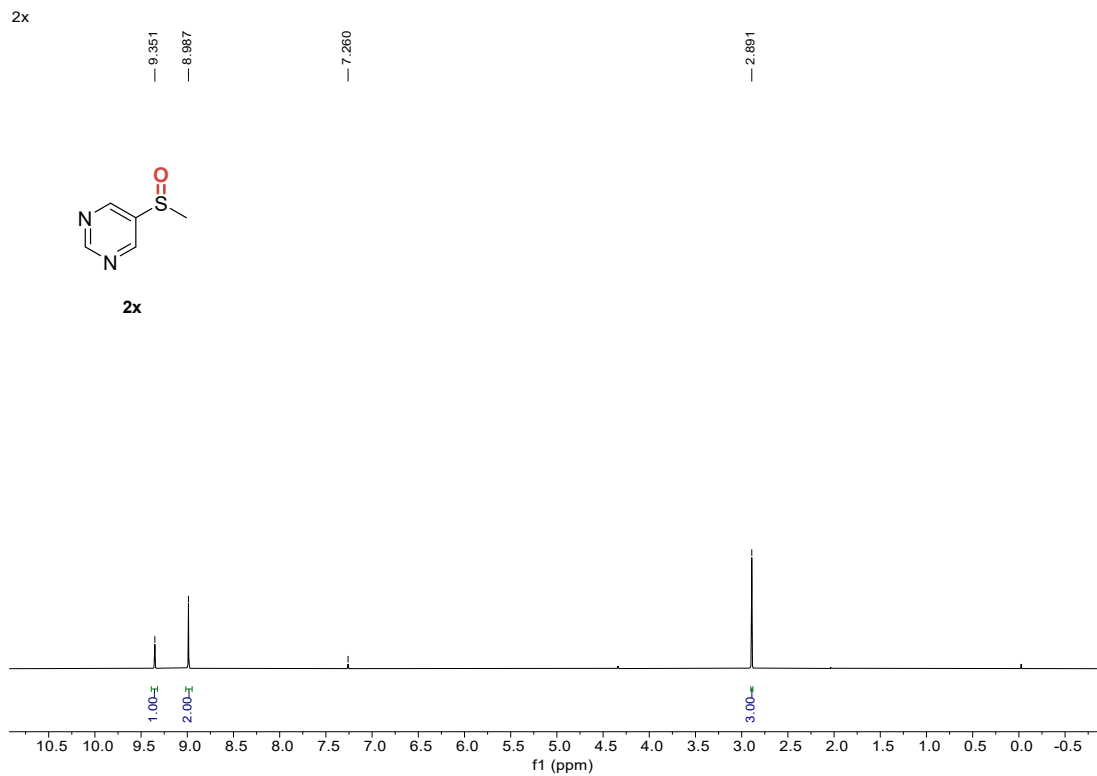

**Fig. S60**  $^1\text{H}$  NMR spectrum (400 MHz,  $\text{CDCl}_3$ ) of **2x**.

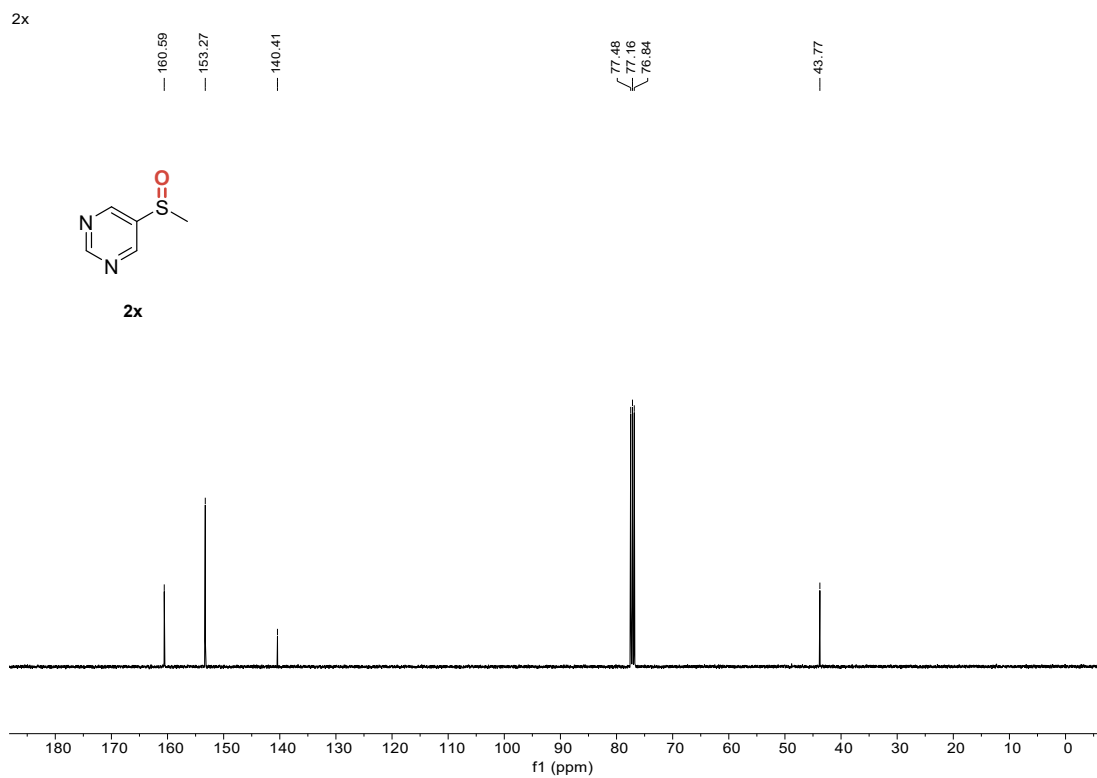

**Fig. S61**  $^{13}\text{C}$  NMR spectrum (101 MHz,  $\text{CDCl}_3$ ) of **2x**.

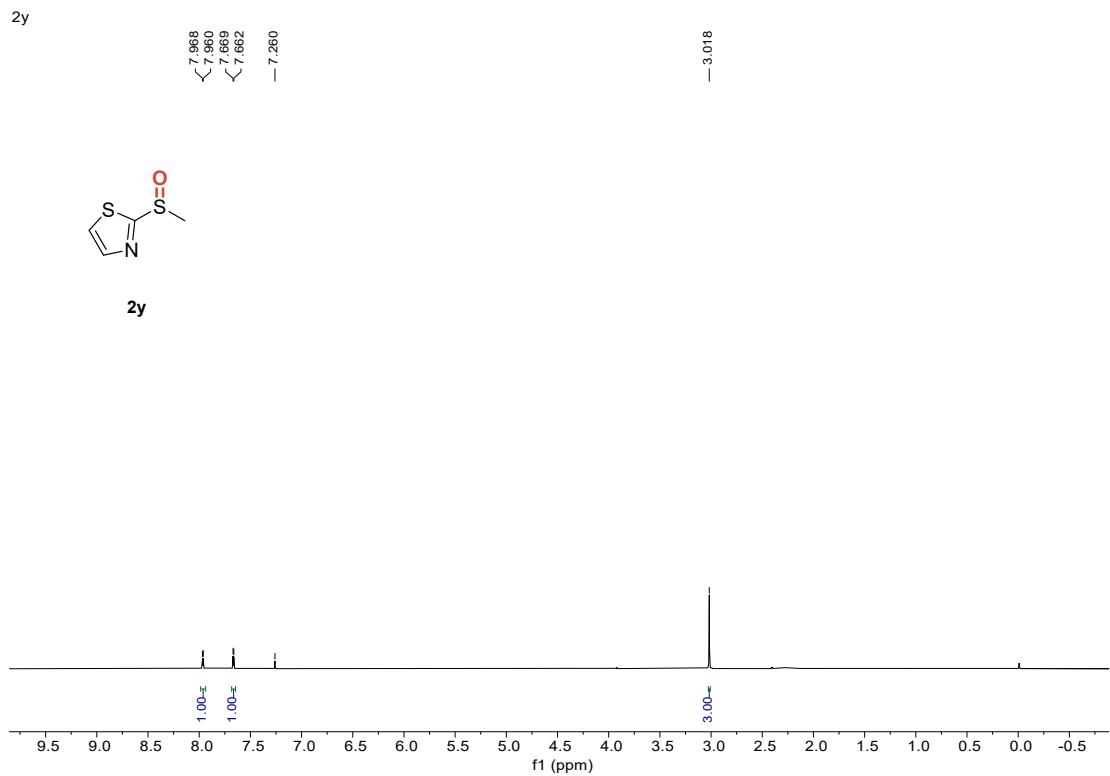

Fig. S62 <sup>1</sup>H NMR spectrum (400 MHz, CDCl<sub>3</sub>) of 2y.

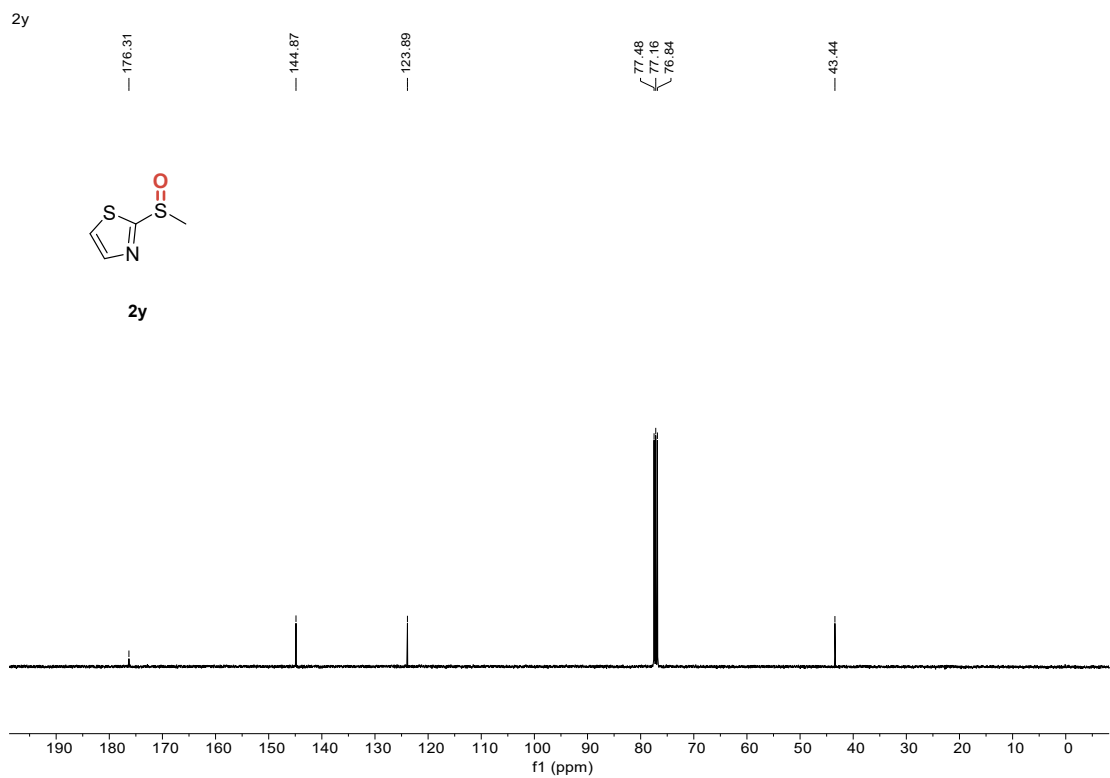

Fig. S63 <sup>13</sup>C NMR spectrum (101 MHz, CDCl<sub>3</sub>) of 2y.



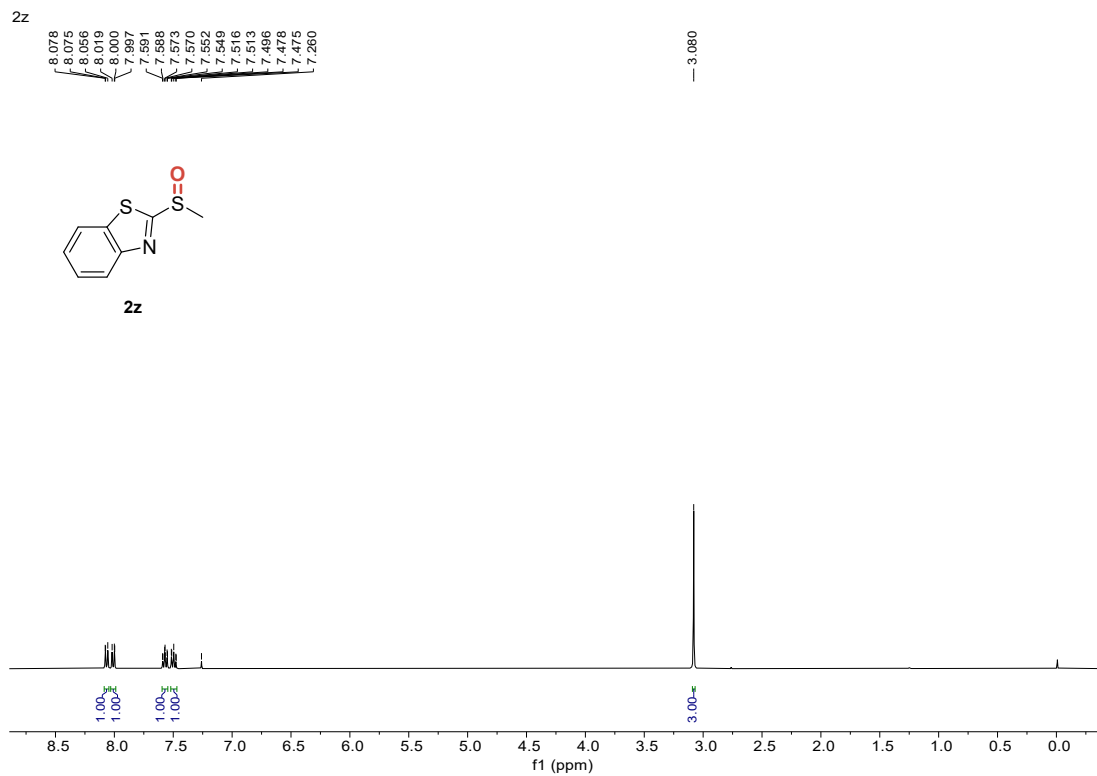

Fig. S64  $^1\text{H}$  NMR spectrum (400 MHz,  $\text{CDCl}_3$ ) of **2z**.

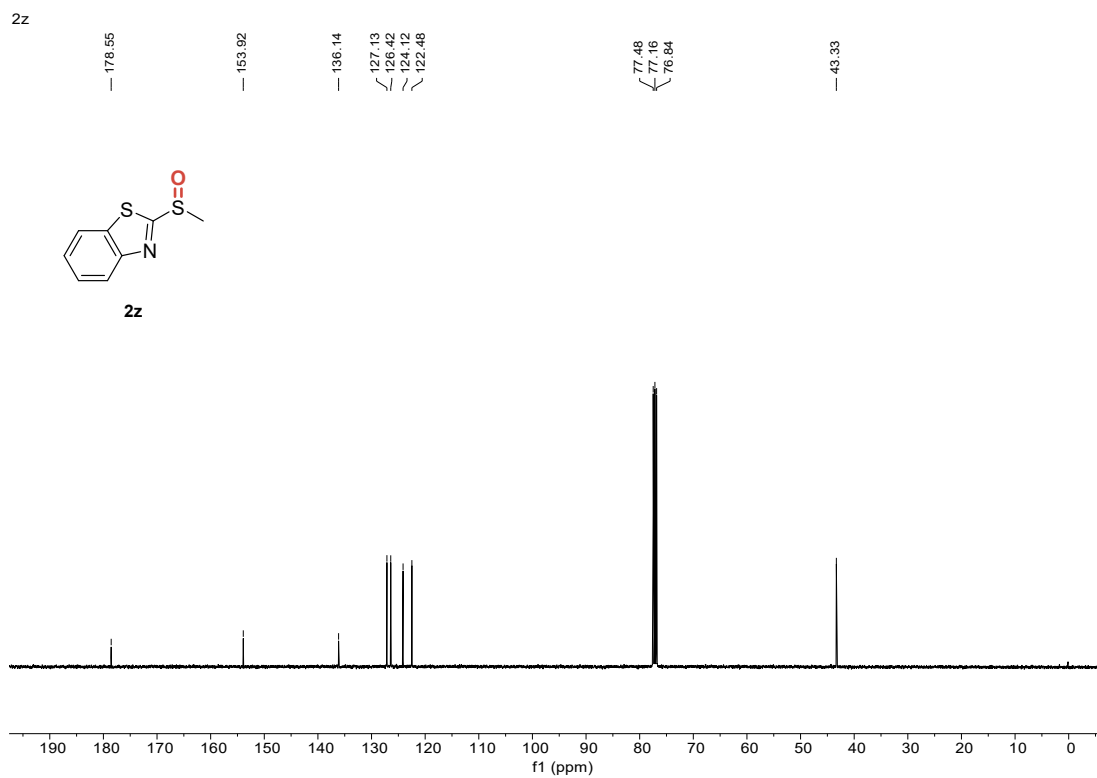

Fig. S65  $^{13}\text{C}$  NMR spectrum (101 MHz,  $\text{CDCl}_3$ ) of **2z**.

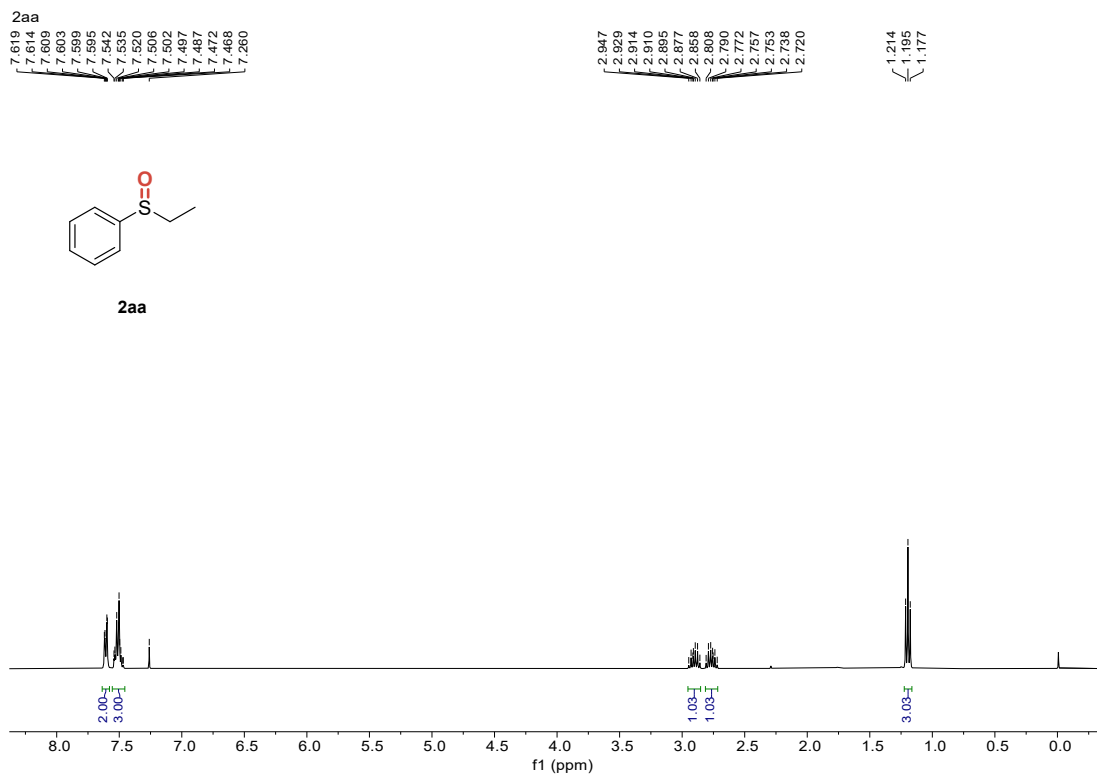

Fig. S66  $^1\text{H}$  NMR spectrum (400 MHz,  $\text{CDCl}_3$ ) of **2aa**.

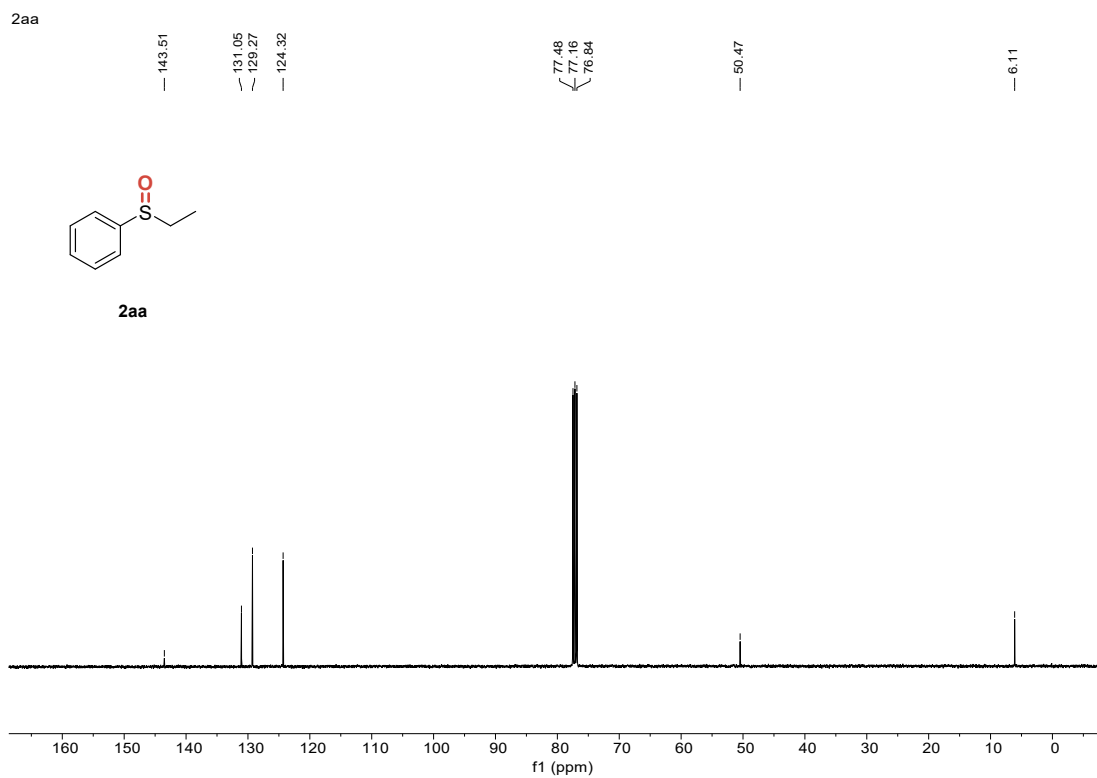

Fig. S67  $^{13}\text{C}$  NMR spectrum (101 MHz,  $\text{CDCl}_3$ ) of **2aa**.

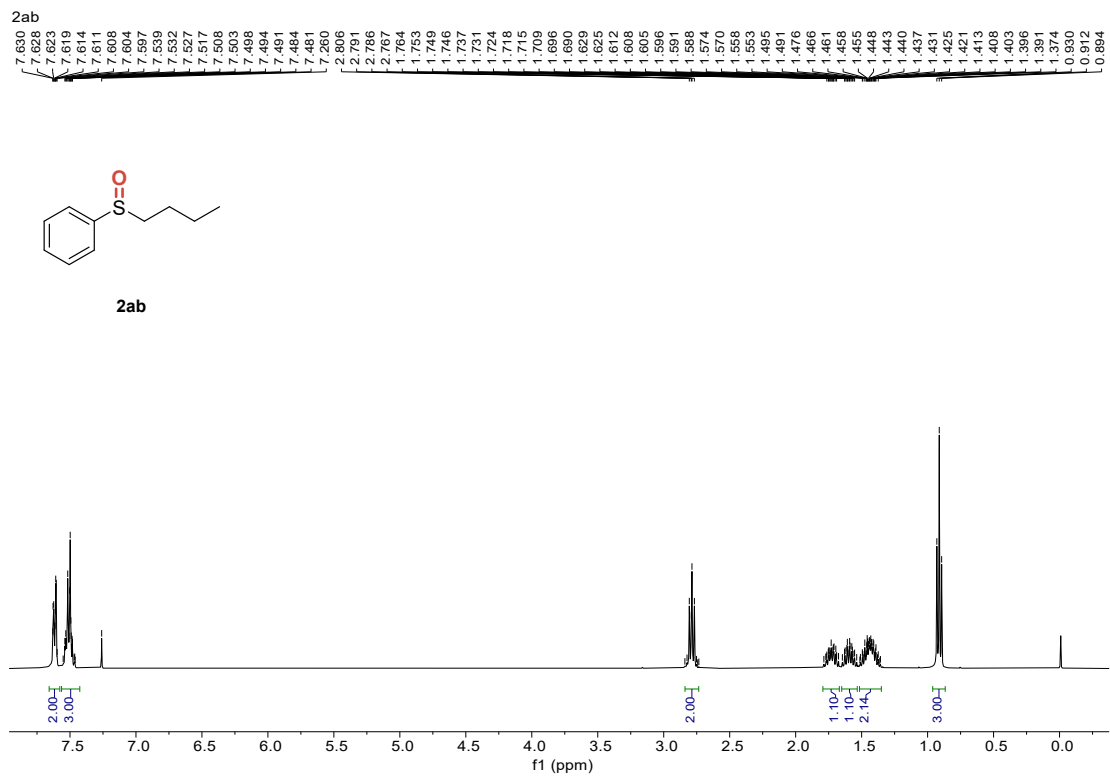

Fig. S68  $^1\text{H}$  NMR spectrum (400 MHz,  $\text{CDCl}_3$ ) of **2ab**.

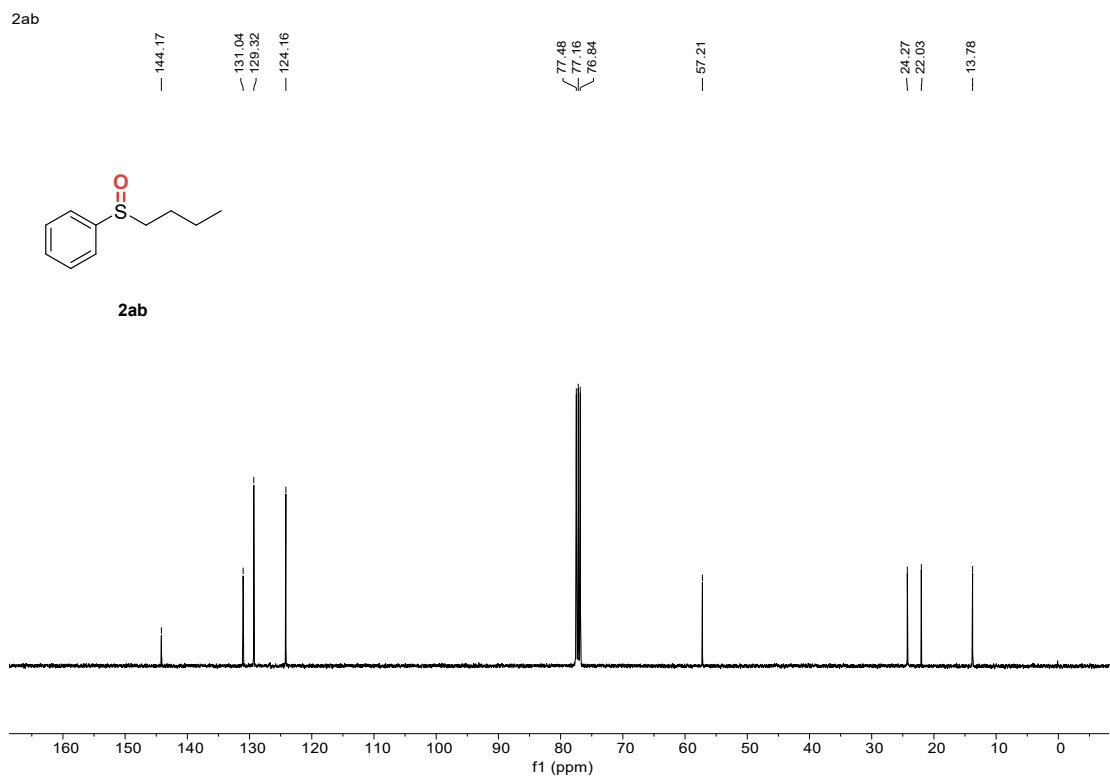

Fig. S69  $^{13}\text{C}$  NMR spectrum (101 MHz,  $\text{CDCl}_3$ ) of **2ab**.

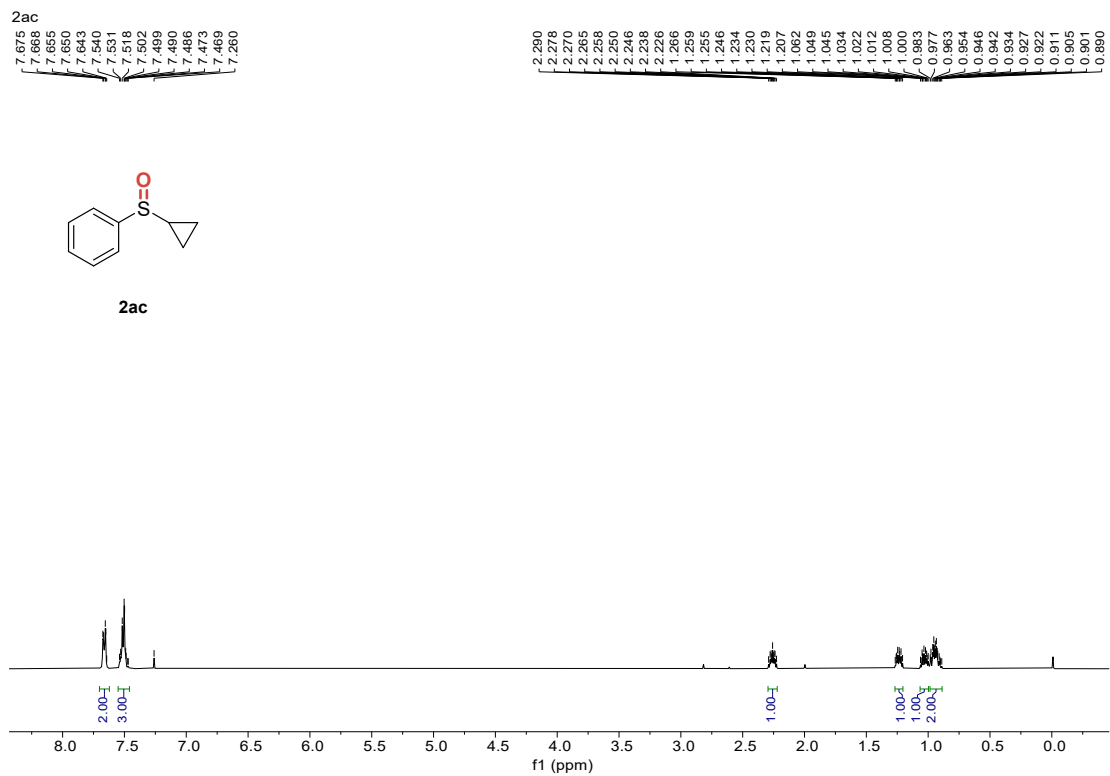

Fig. S70  $^1\text{H}$  NMR spectrum (400 MHz,  $\text{CDCl}_3$ ) of **2ac**.

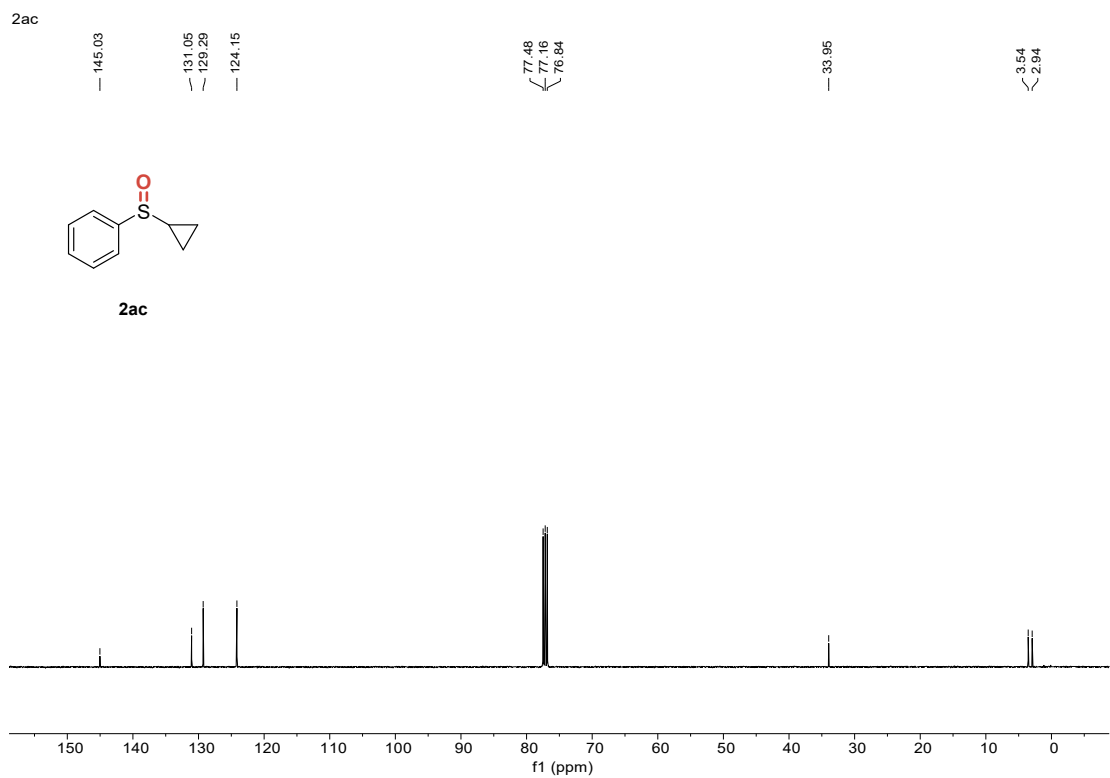

Fig. S71  $^{13}\text{C}$  NMR spectrum (101 MHz,  $\text{CDCl}_3$ ) of **2ac**.

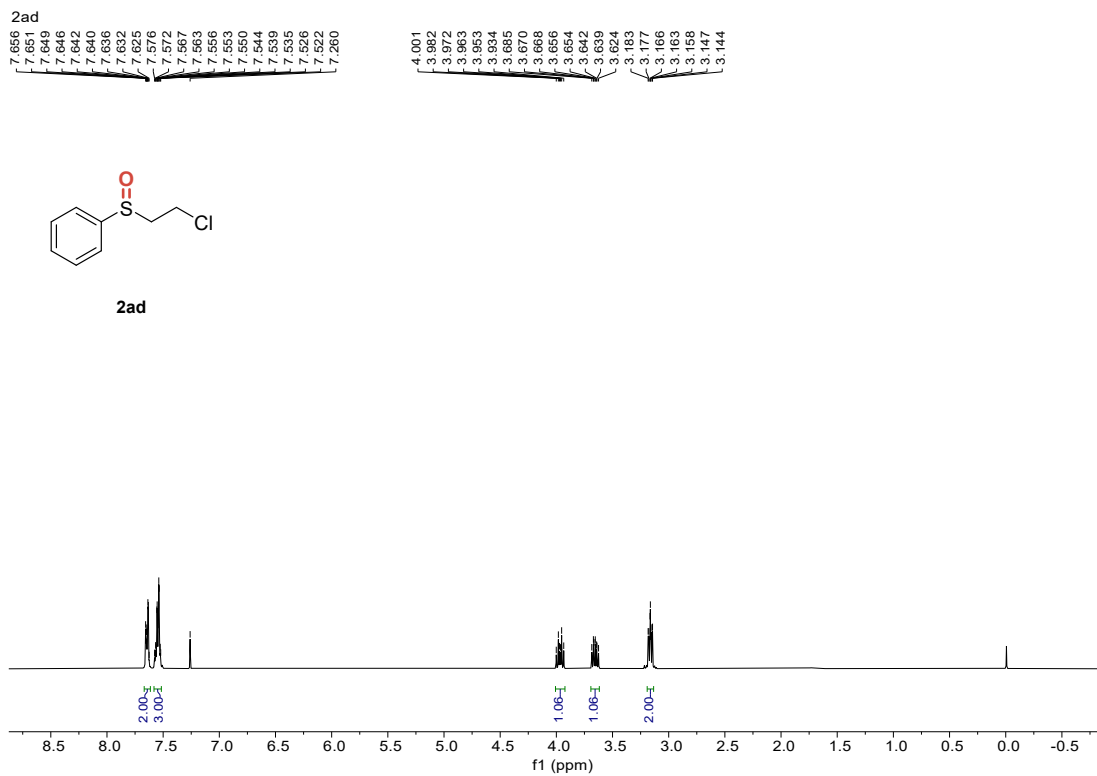

Fig. S72  $^1\text{H}$  NMR spectrum (400 MHz,  $\text{CDCl}_3$ ) of 2ad.

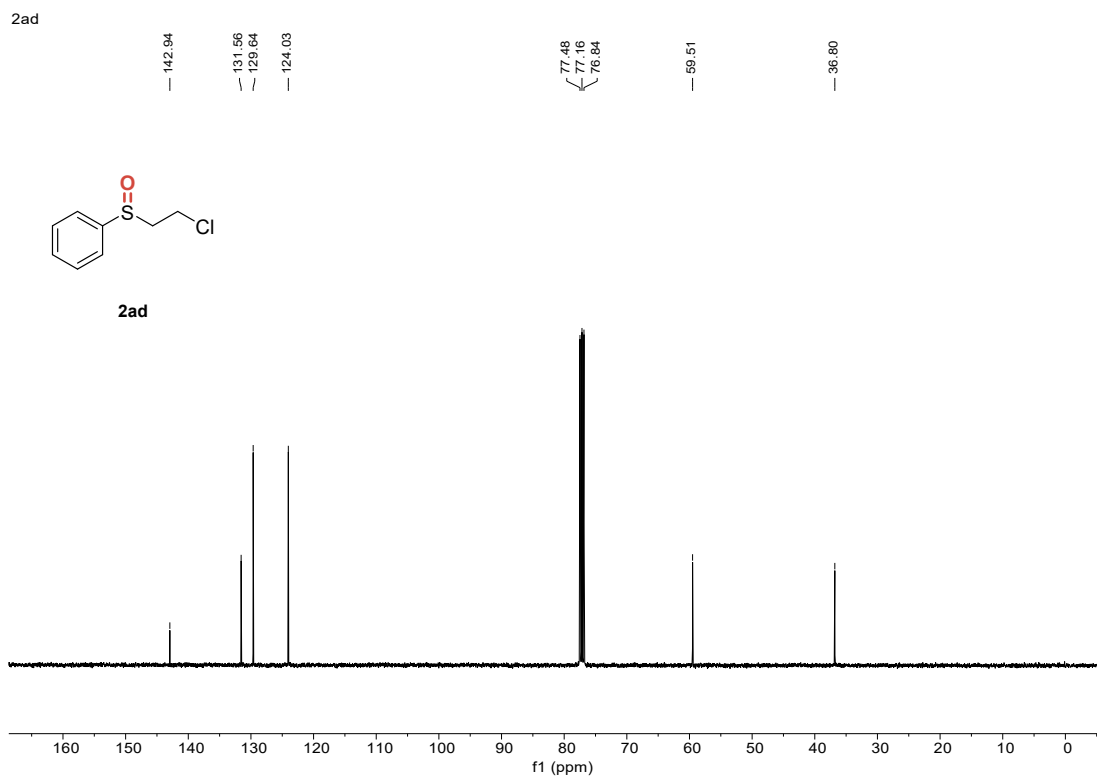

Fig. S73  $^{13}\text{C}$  NMR spectrum (101 MHz,  $\text{CDCl}_3$ ) of 2ad.

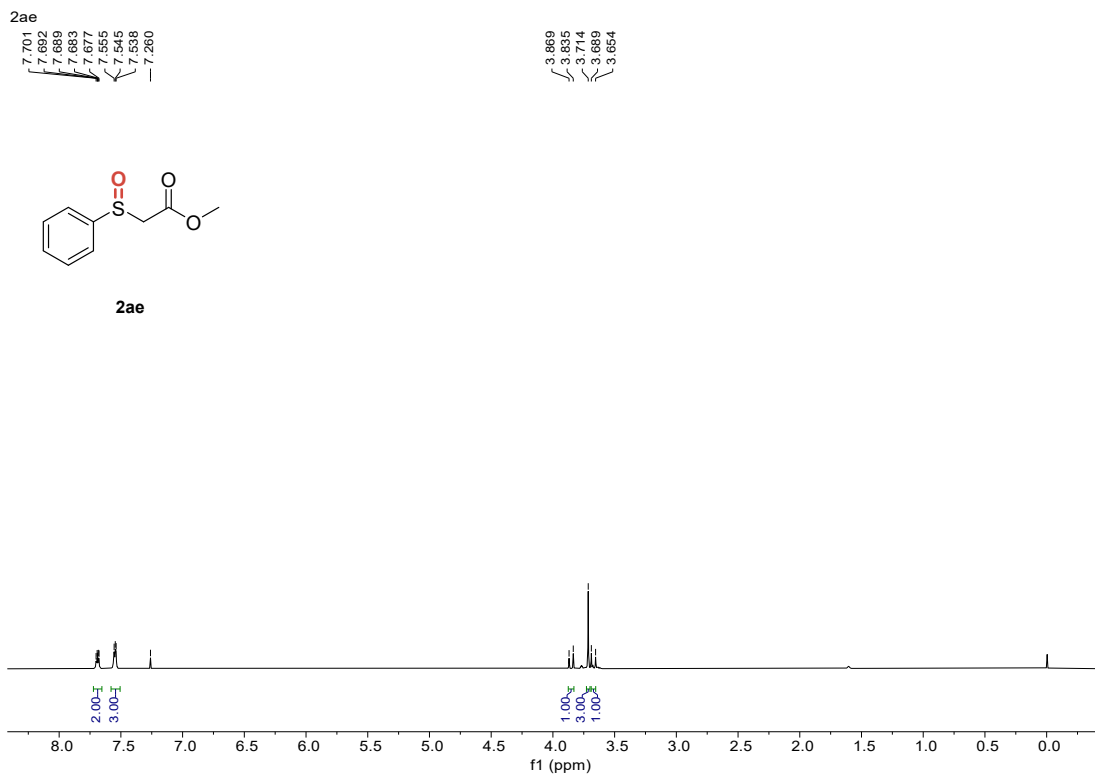

Fig. S74  $^1\text{H}$  NMR spectrum (400 MHz,  $\text{CDCl}_3$ ) of **2ae**.

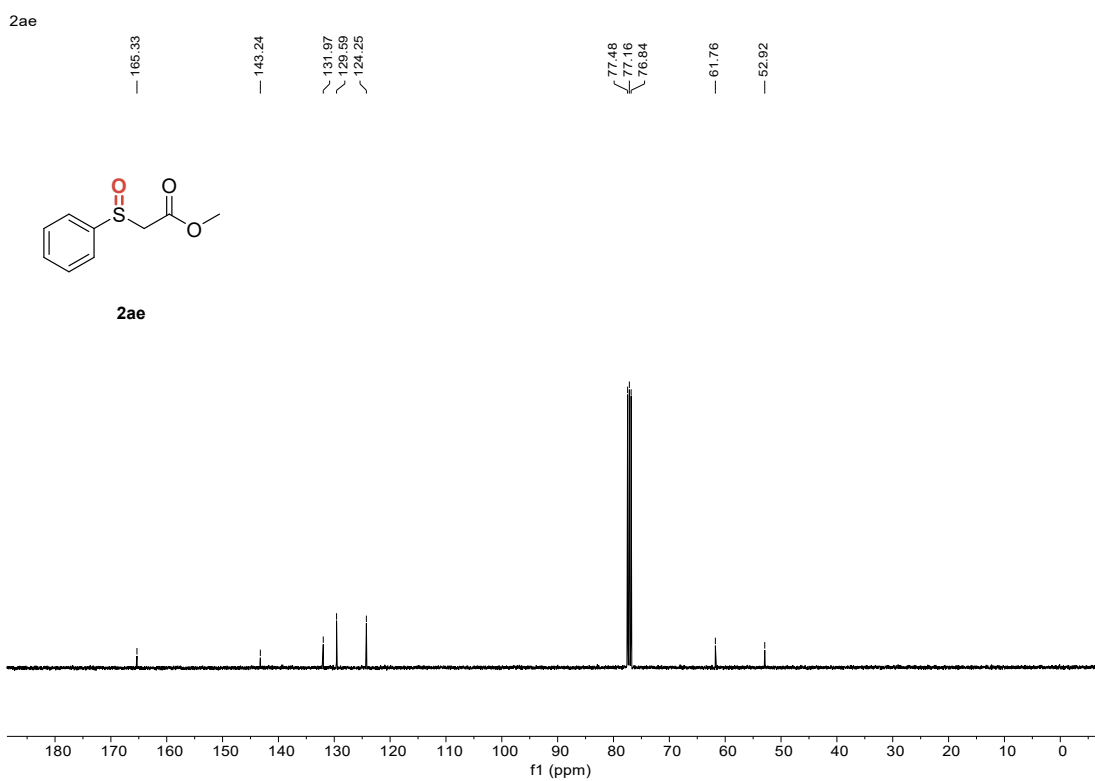

Fig. S75  $^{13}\text{C}$  NMR spectrum (101 MHz,  $\text{CDCl}_3$ ) of **2ae**.



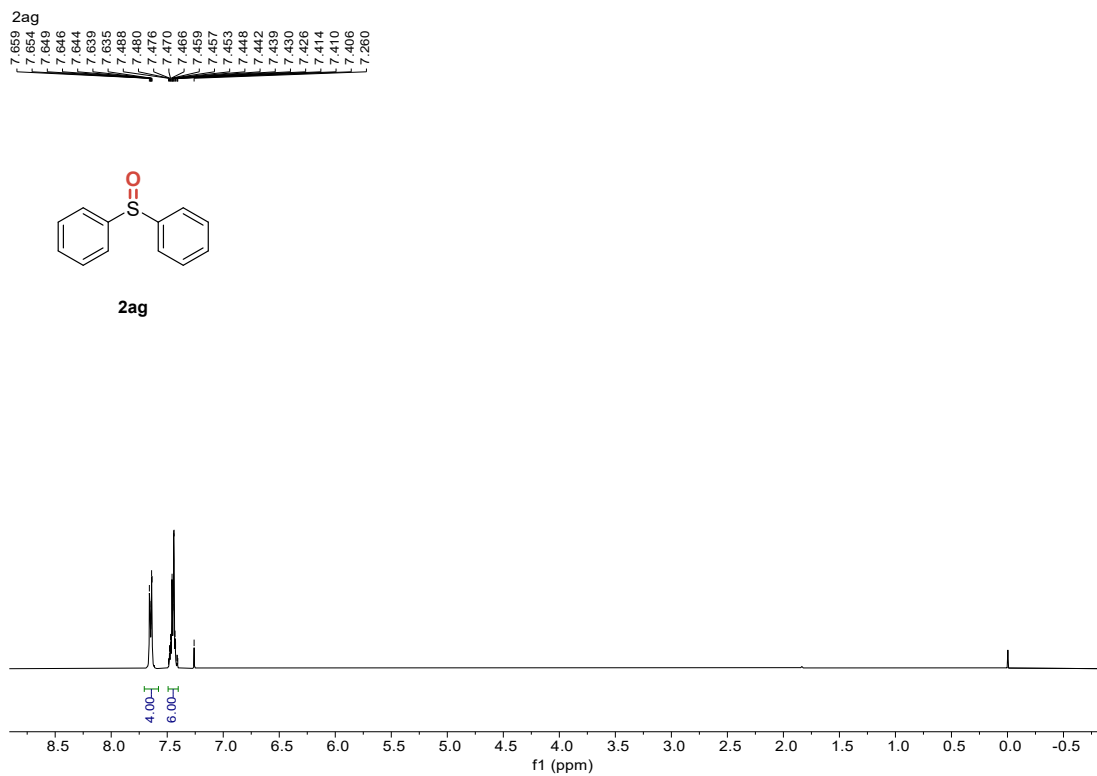

Fig. S78  $^1\text{H}$  NMR spectrum (400 MHz,  $\text{CDCl}_3$ ) of **2ag**.

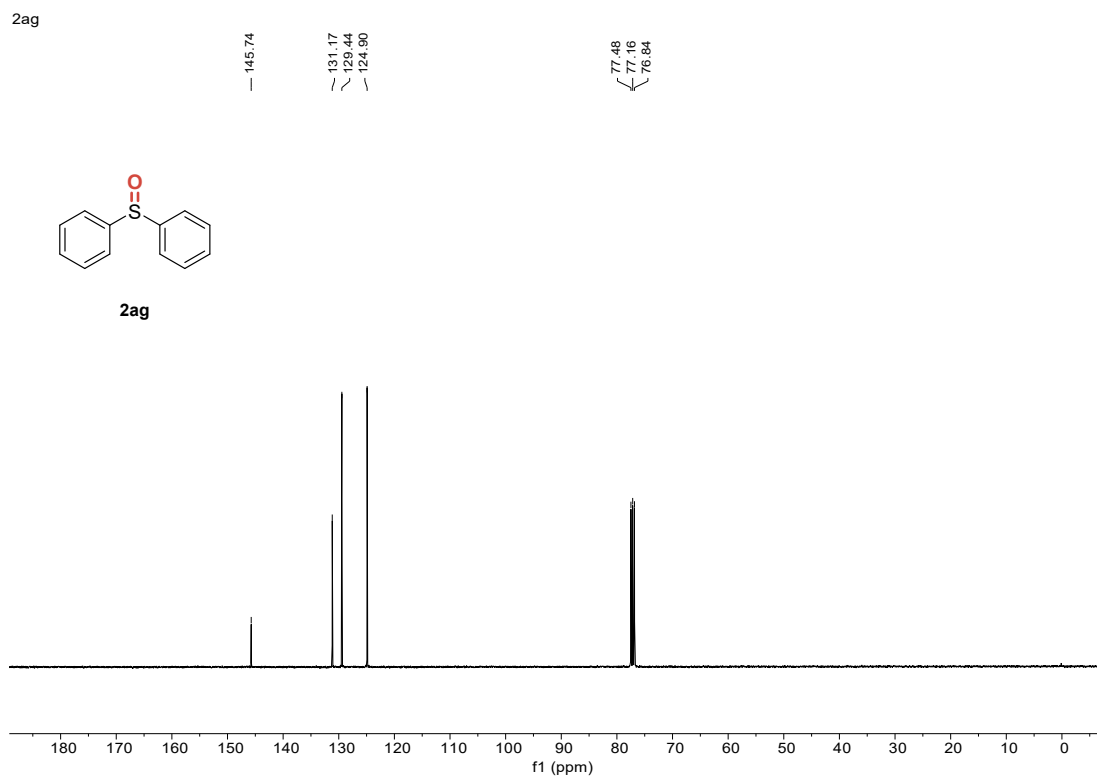

Fig. S79  $^{13}\text{C}$  NMR spectrum (101 MHz,  $\text{CDCl}_3$ ) of **2ag**.



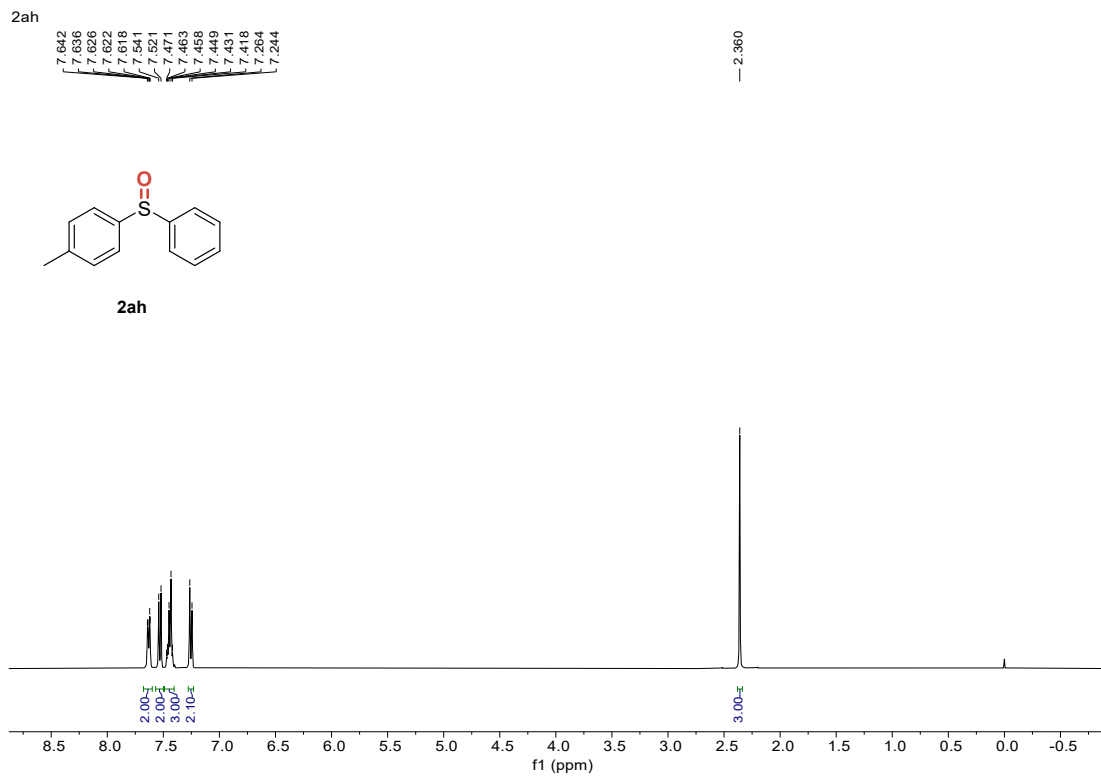

**Fig. S80**  $^1\text{H}$  NMR spectrum (400 MHz,  $\text{CDCl}_3$ ) of **2ah**.

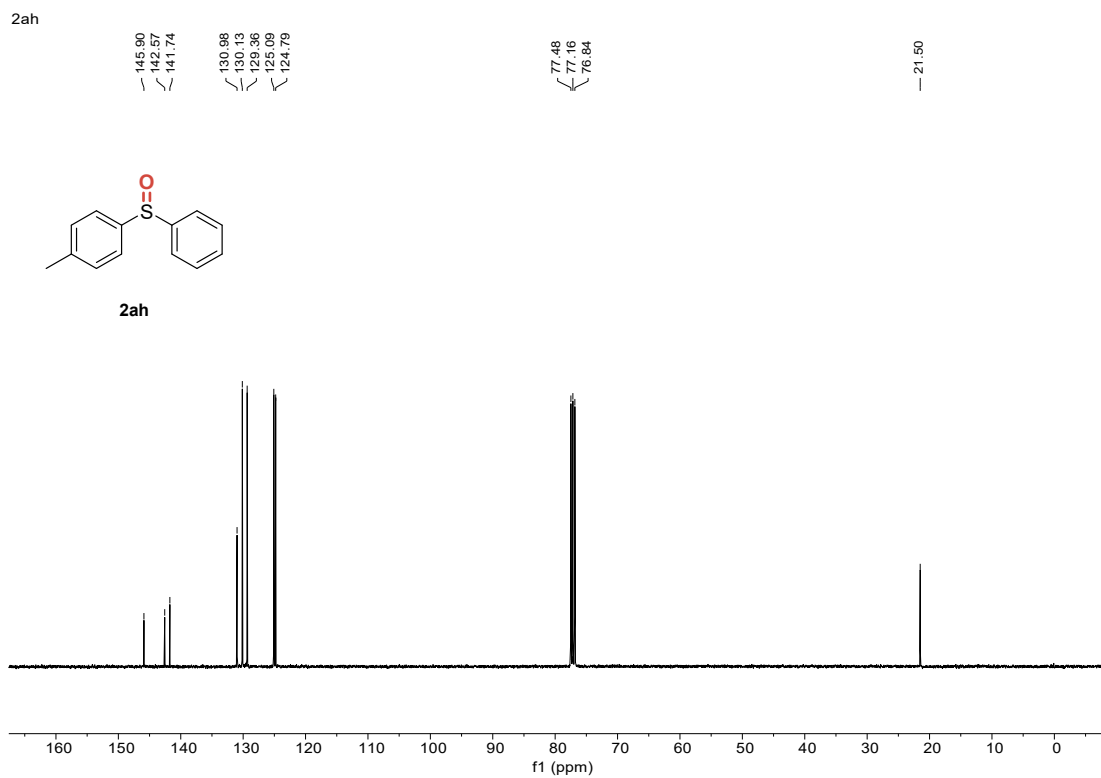

**Fig. S81**  $^{13}\text{C}$  NMR spectrum (101 MHz,  $\text{CDCl}_3$ ) of **2ah**.

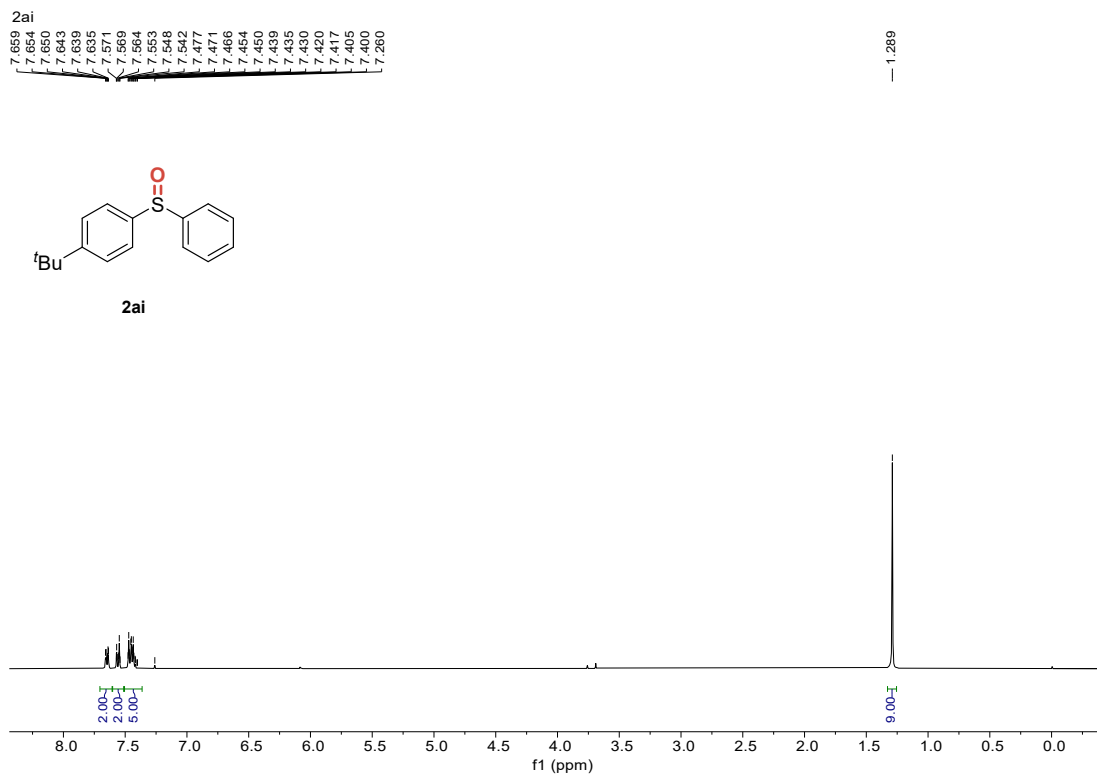

Fig. S82  $^1\text{H}$  NMR spectrum (400 MHz,  $\text{CDCl}_3$ ) of **2ai**.

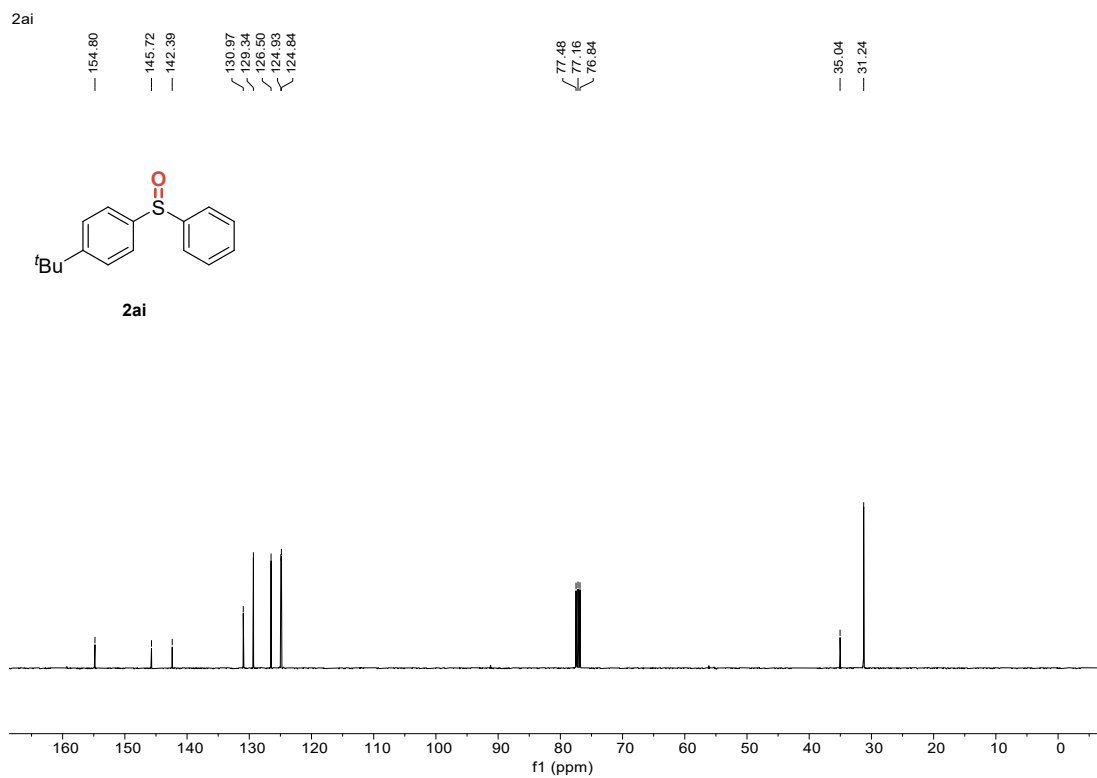

Fig. S83  $^{13}\text{C}$  NMR spectrum (101 MHz,  $\text{CDCl}_3$ ) of **2ai**.

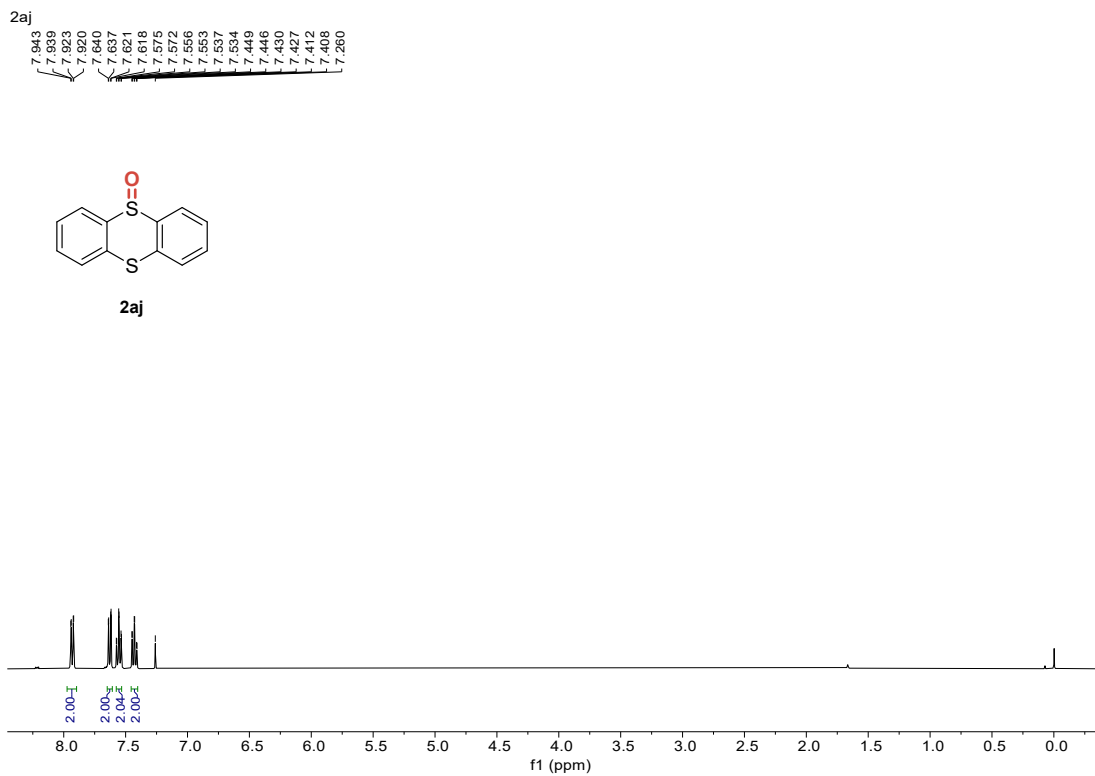

Fig. S84  $^1\text{H}$  NMR spectrum (400 MHz,  $\text{CDCl}_3$ ) of **2aj**.

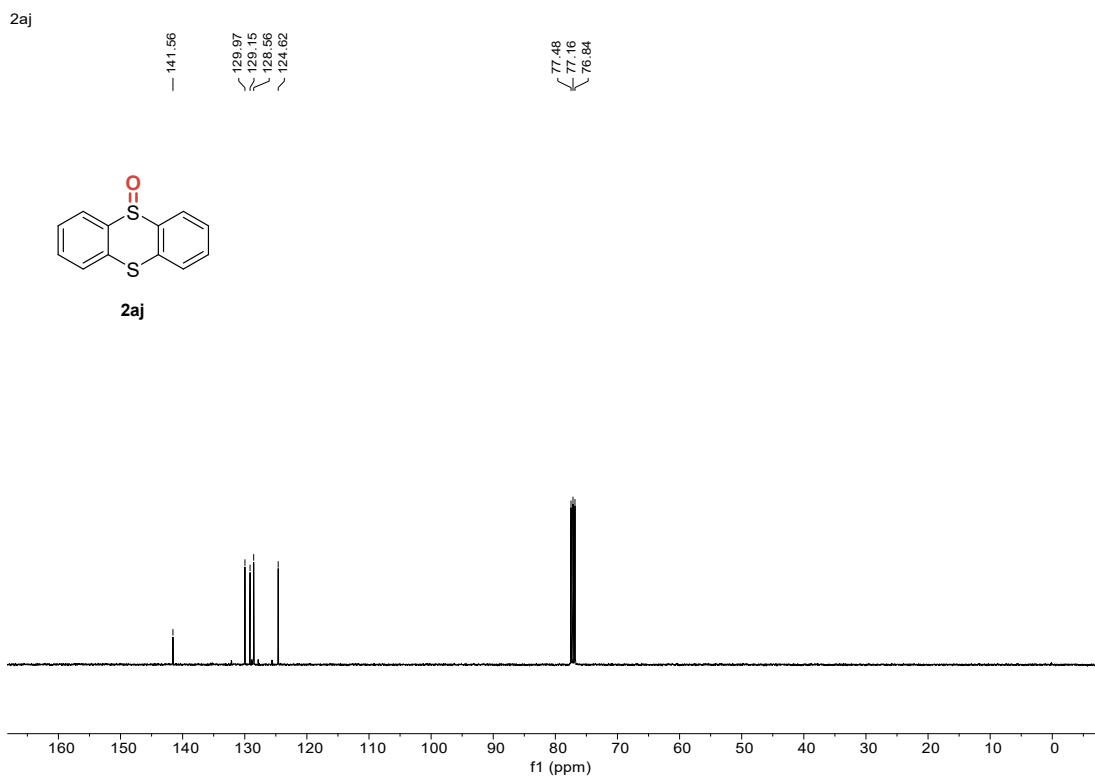

Fig. S85  $^{13}\text{C}$  NMR spectrum (101 MHz,  $\text{CDCl}_3$ ) of **2aj**.

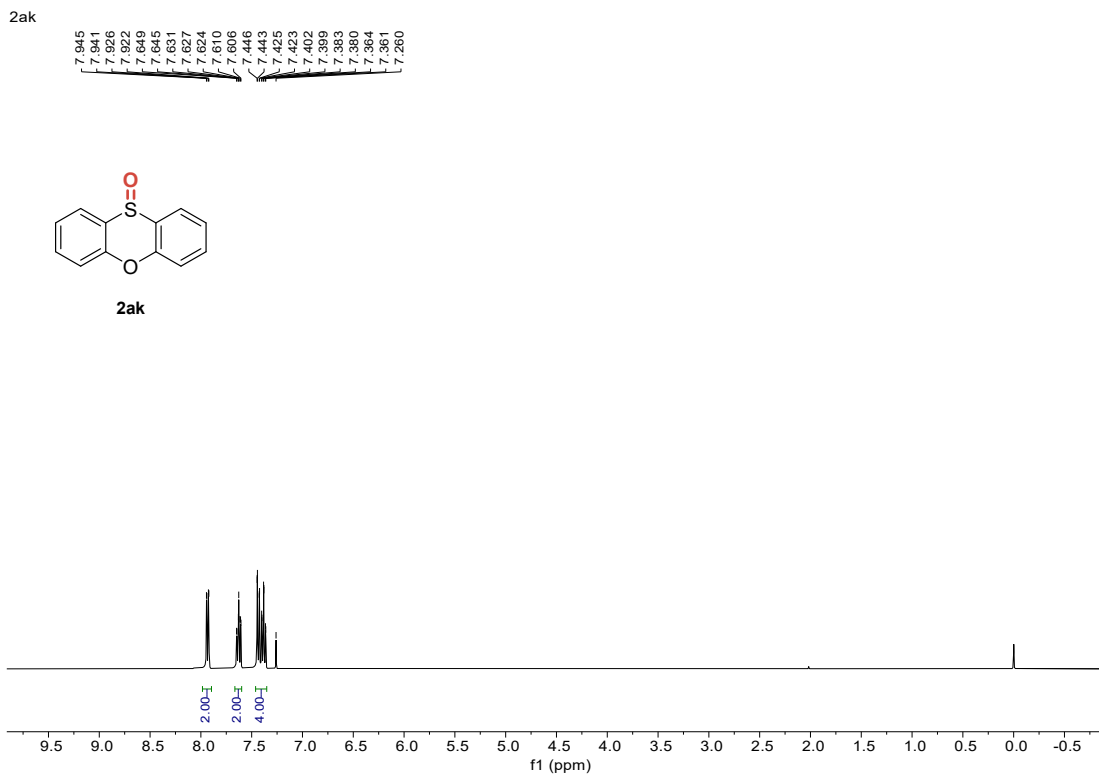

Fig. S86  $^1\text{H}$  NMR spectrum (400 MHz,  $\text{CDCl}_3$ ) of **2ak**.

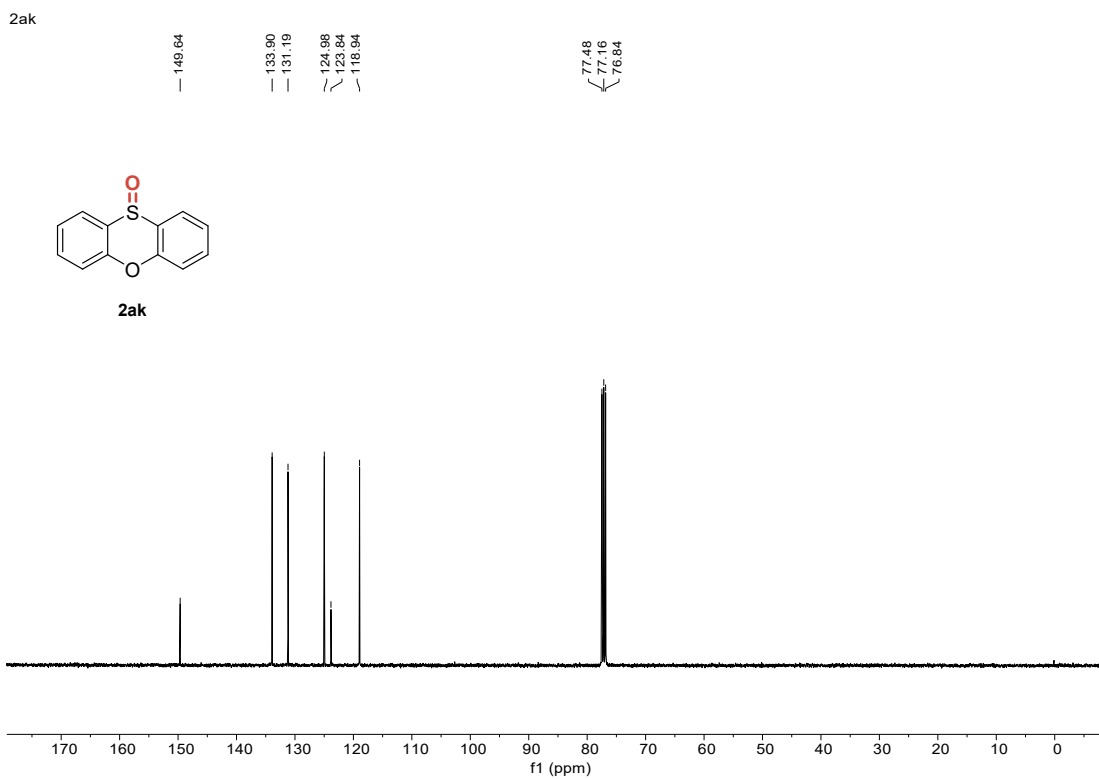

Fig. S87  $^{13}\text{C}$  NMR spectrum (101 MHz,  $\text{CDCl}_3$ ) of **2ak**.

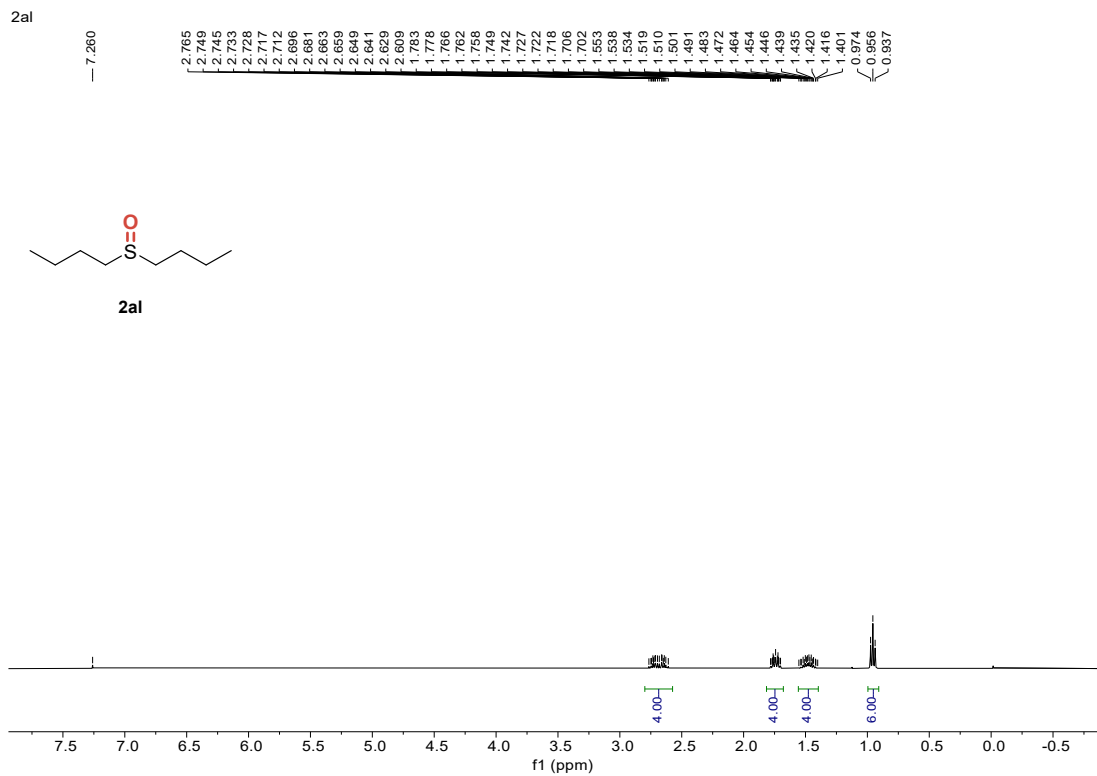

Fig. S88  $^1\text{H}$  NMR spectrum (400 MHz,  $\text{CDCl}_3$ ) of **2al**.

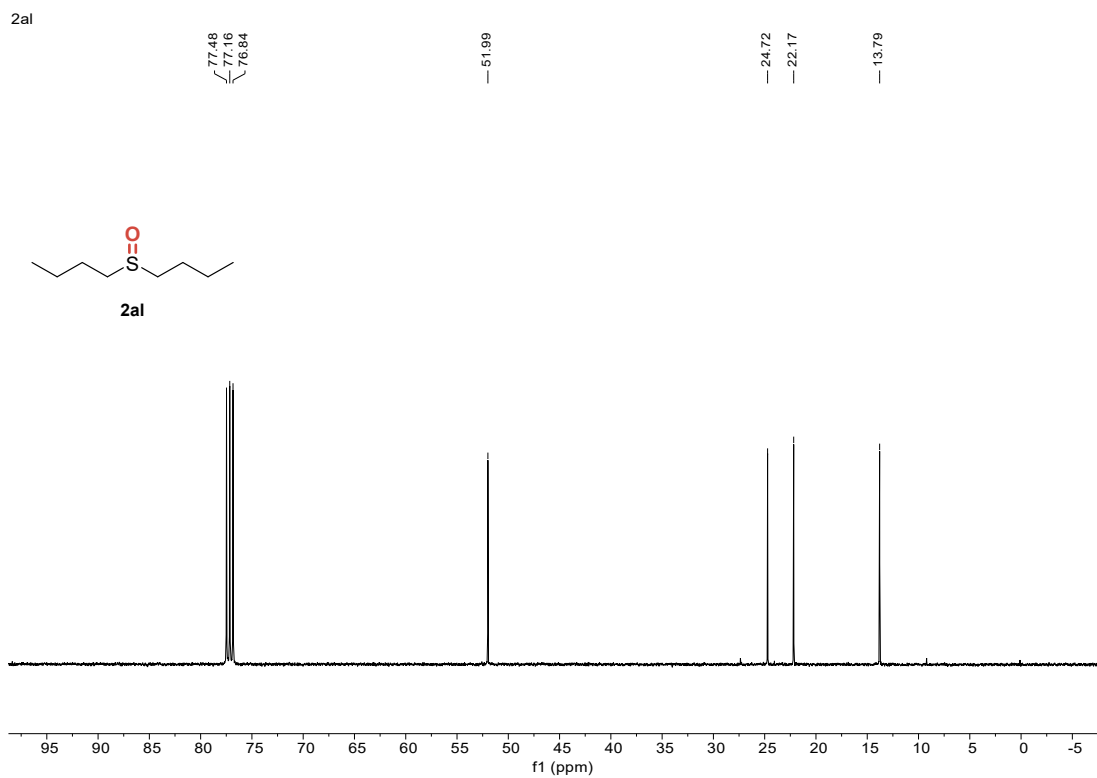

Fig. S89  $^{13}\text{C}$  NMR spectrum (101 MHz,  $\text{CDCl}_3$ ) of **2al**.

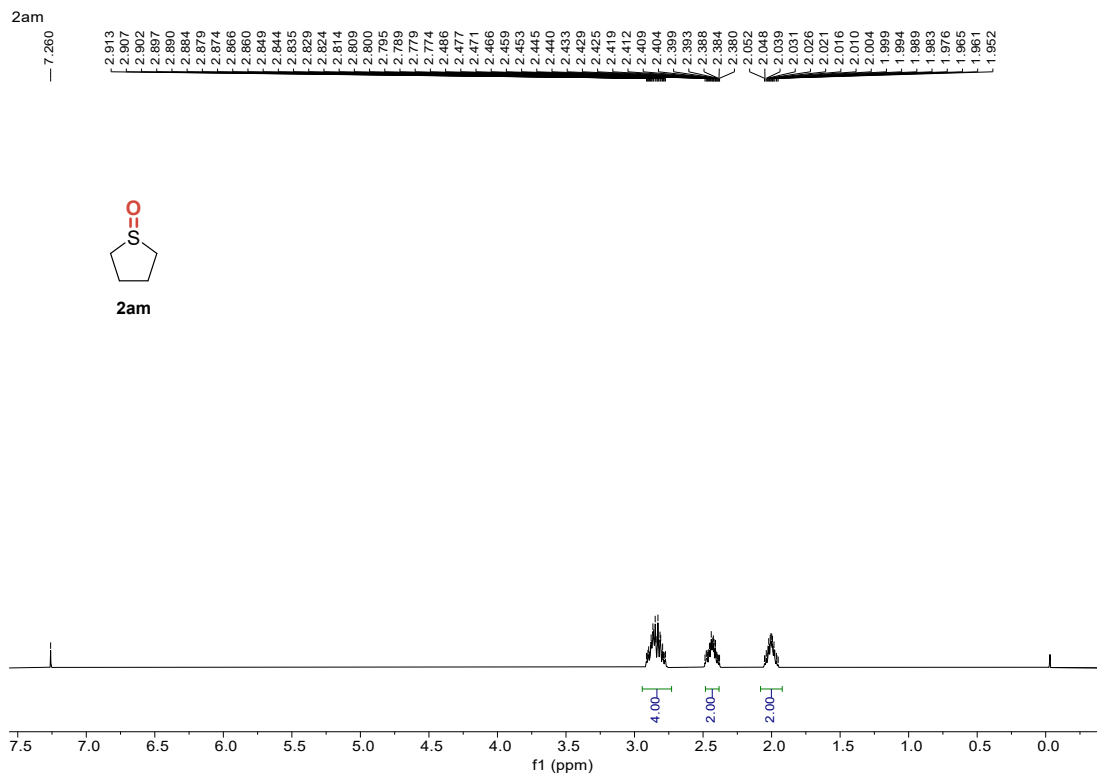

Fig. S90  $^1\text{H}$  NMR spectrum (400 MHz,  $\text{CDCl}_3$ ) of **2am**.

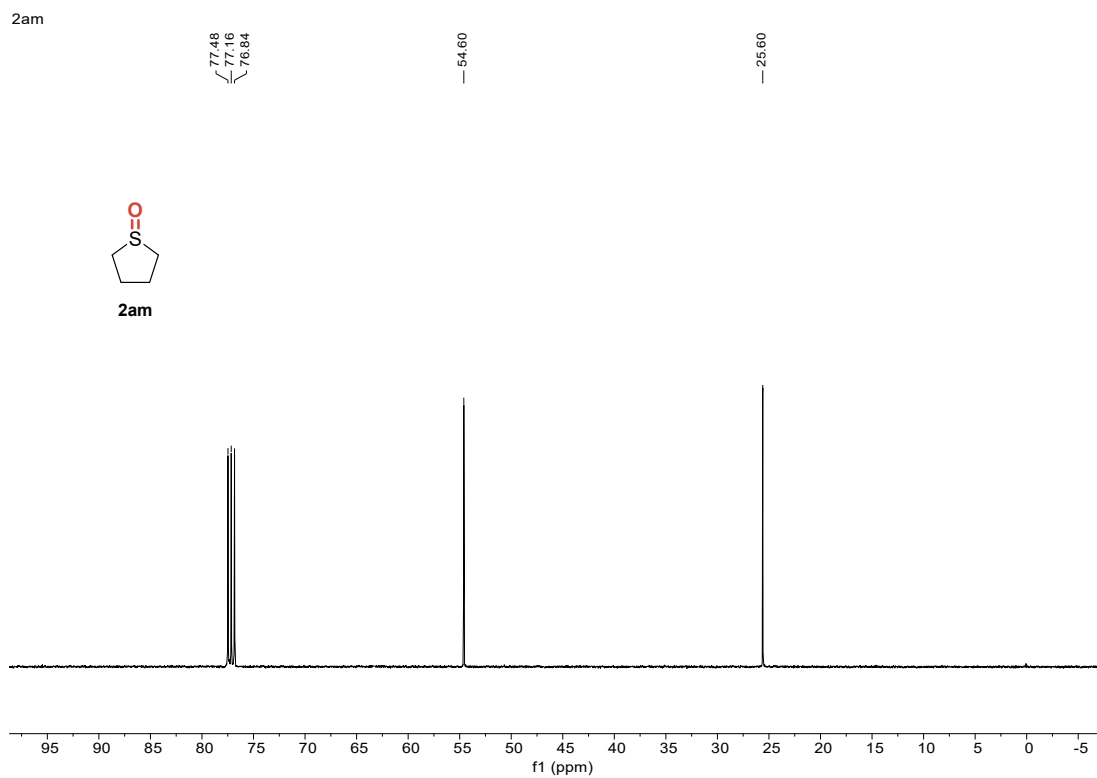

Fig. S91  $^{13}\text{C}$  NMR spectrum (101 MHz,  $\text{CDCl}_3$ ) of **2am**.

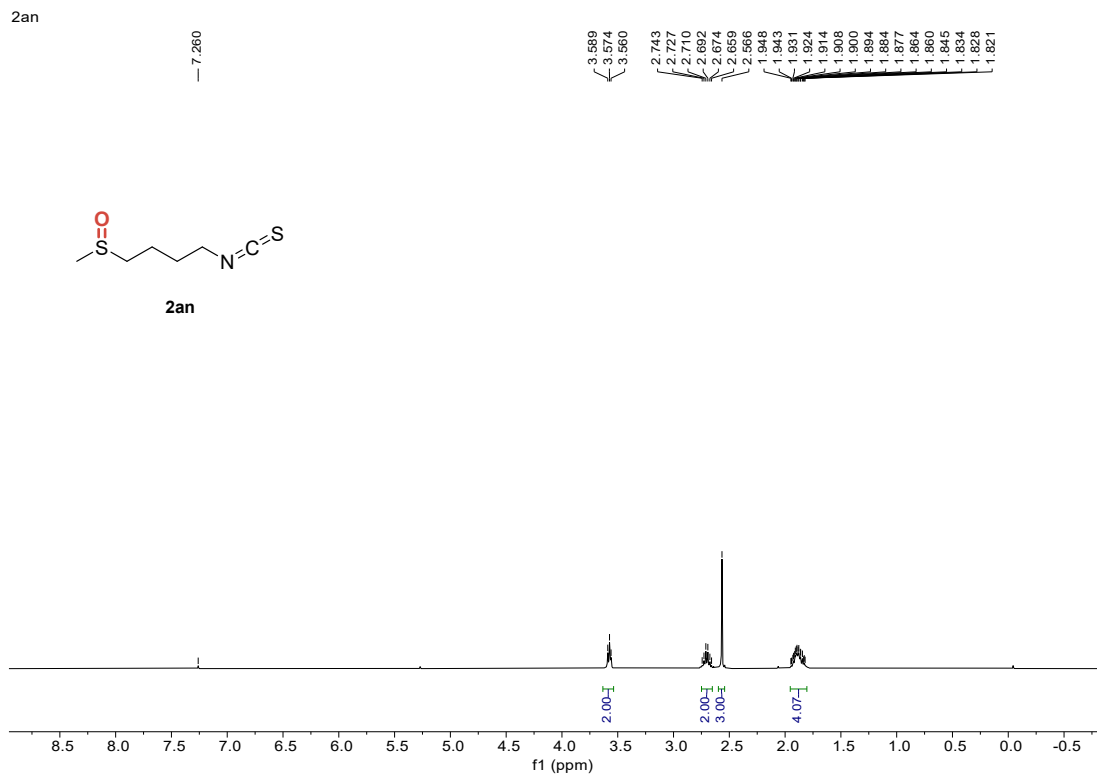

Fig. S92  $^1\text{H}$  NMR spectrum (400 MHz,  $\text{CDCl}_3$ ) of **2an**.

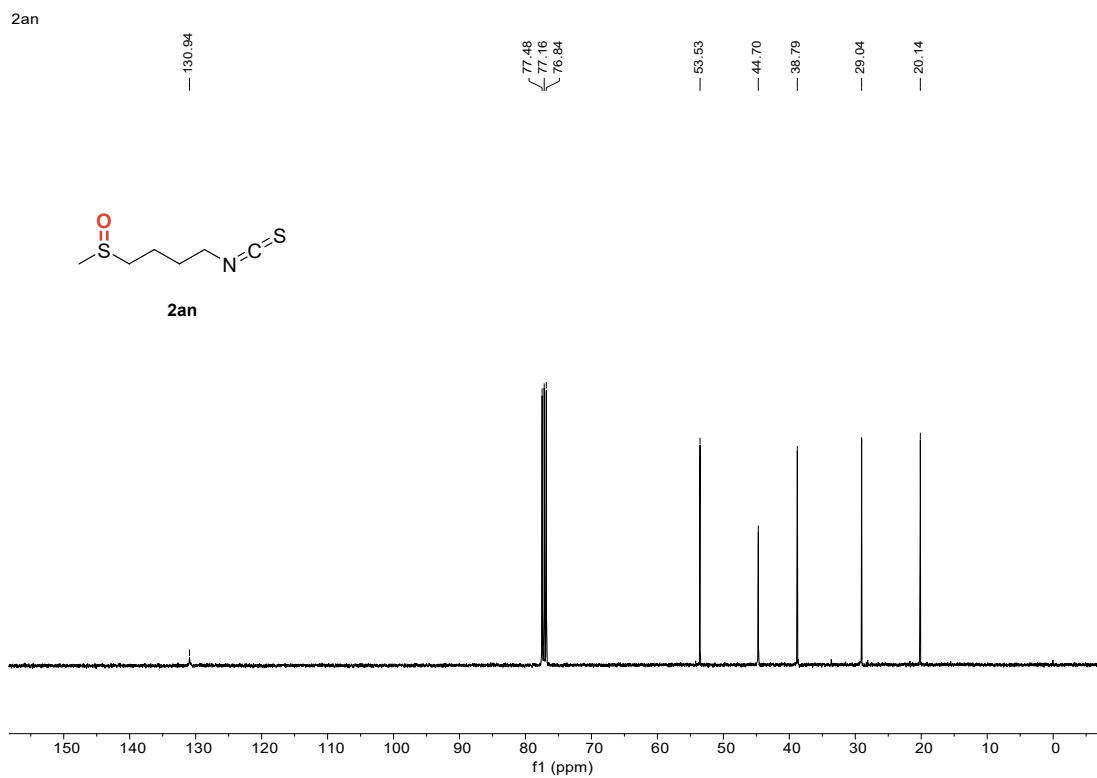

Fig. S93  $^{13}\text{C}$  NMR spectrum (101 MHz,  $\text{CDCl}_3$ ) of **2an**.

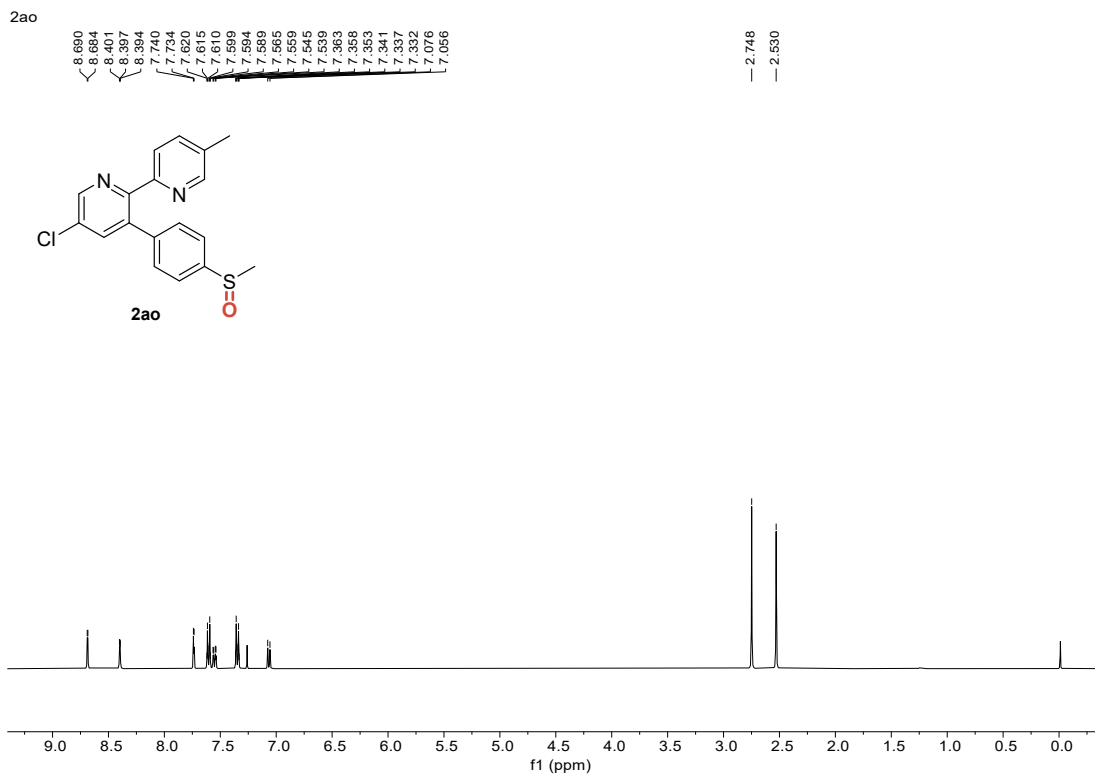

Fig. S94  $^1\text{H}$  NMR spectrum (400 MHz,  $\text{CDCl}_3$ ) of **2ao**.

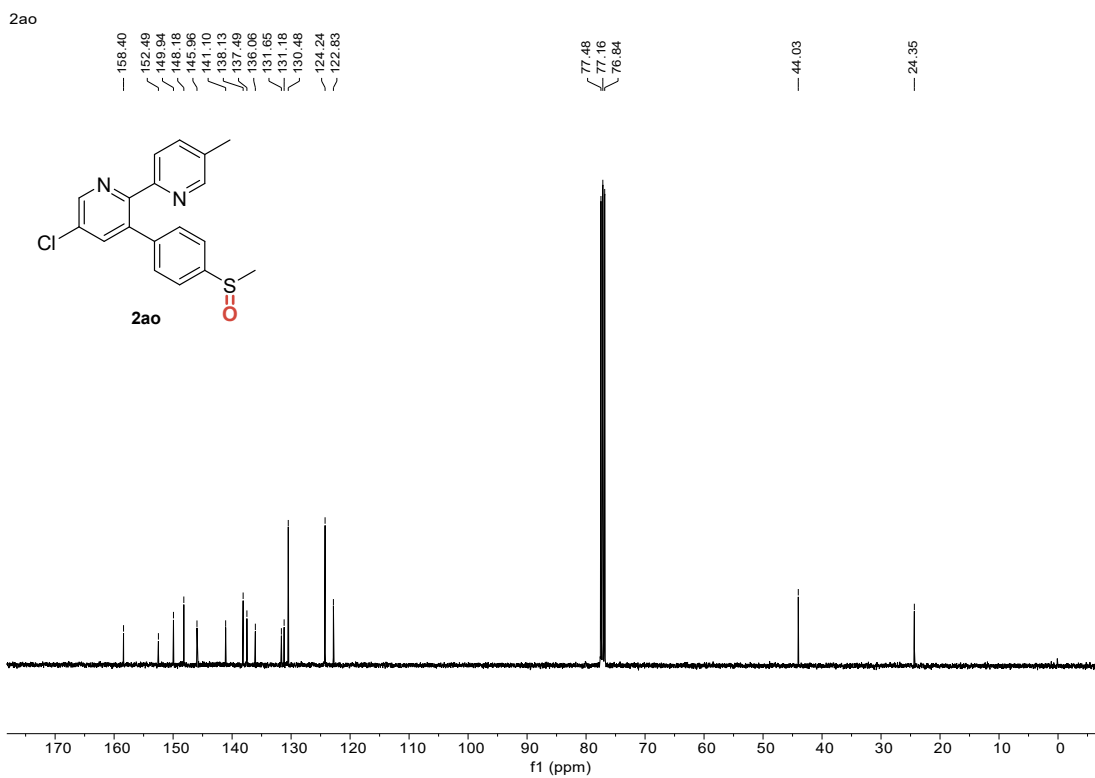

Fig. S95  $^{13}\text{C}$  NMR spectrum (101 MHz,  $\text{CDCl}_3$ ) of **2ao**.



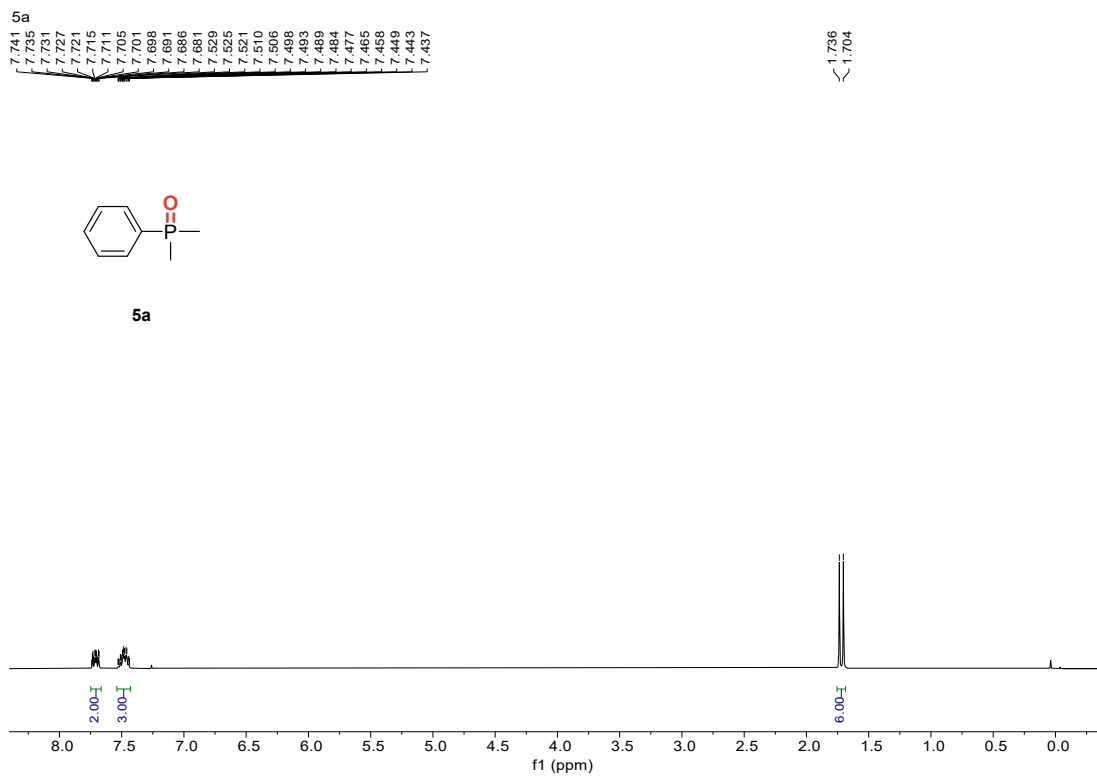

Fig. S96 <sup>1</sup>H NMR spectrum (400 MHz, CDCl<sub>3</sub>) of 5a.

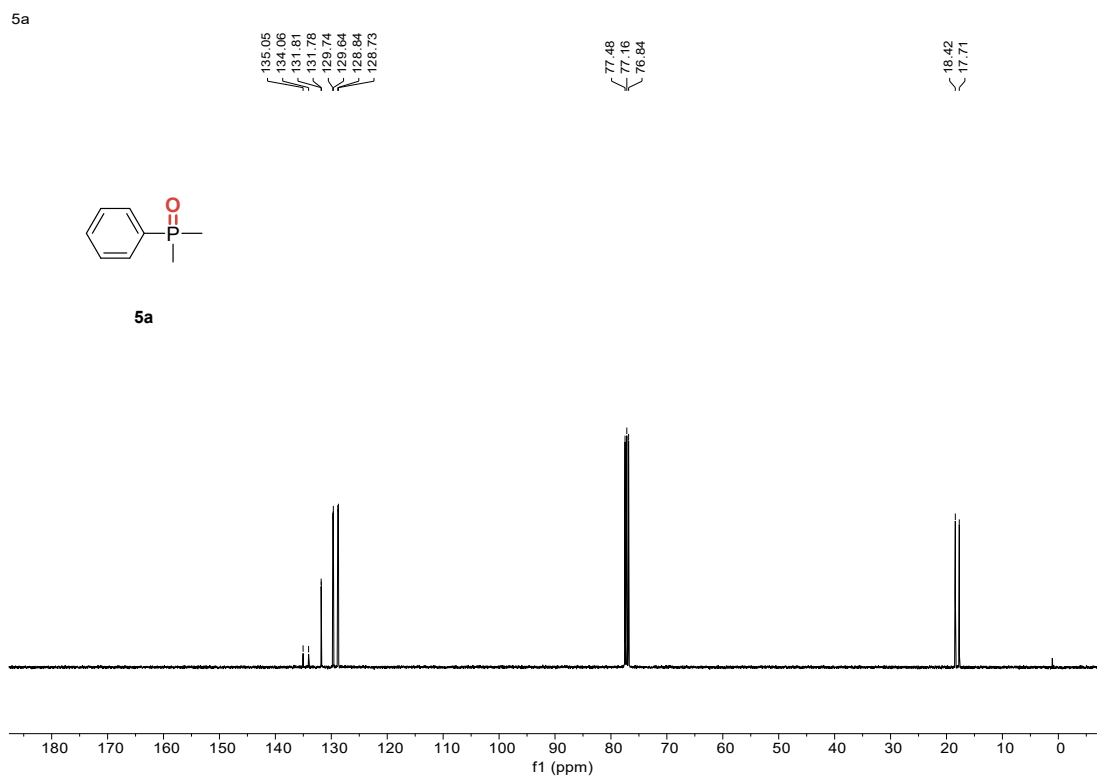

Fig. S97 <sup>13</sup>C NMR spectrum (101 MHz, CDCl<sub>3</sub>) of 5a.

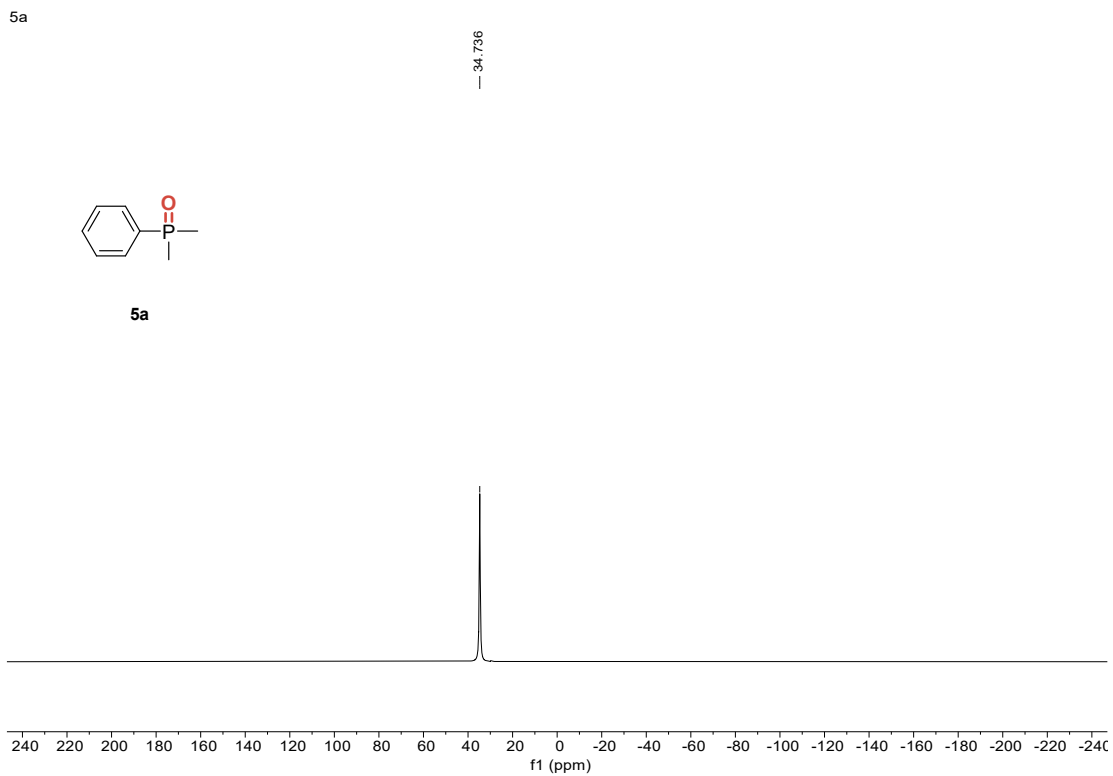

Fig. S98  $^{31}\text{P}$  NMR spectrum (202 MHz,  $\text{CDCl}_3$ ) of **5a**.

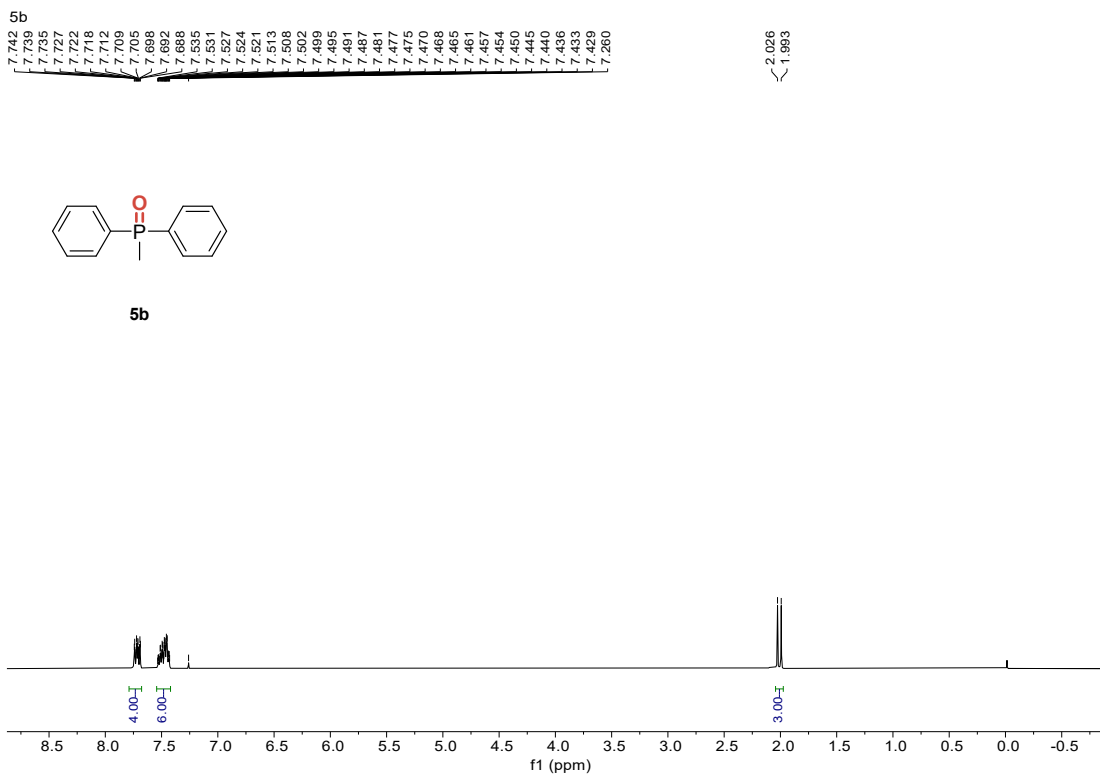

Fig. S99  $^1\text{H}$  NMR spectrum (400 MHz,  $\text{CDCl}_3$ ) of **5b**.

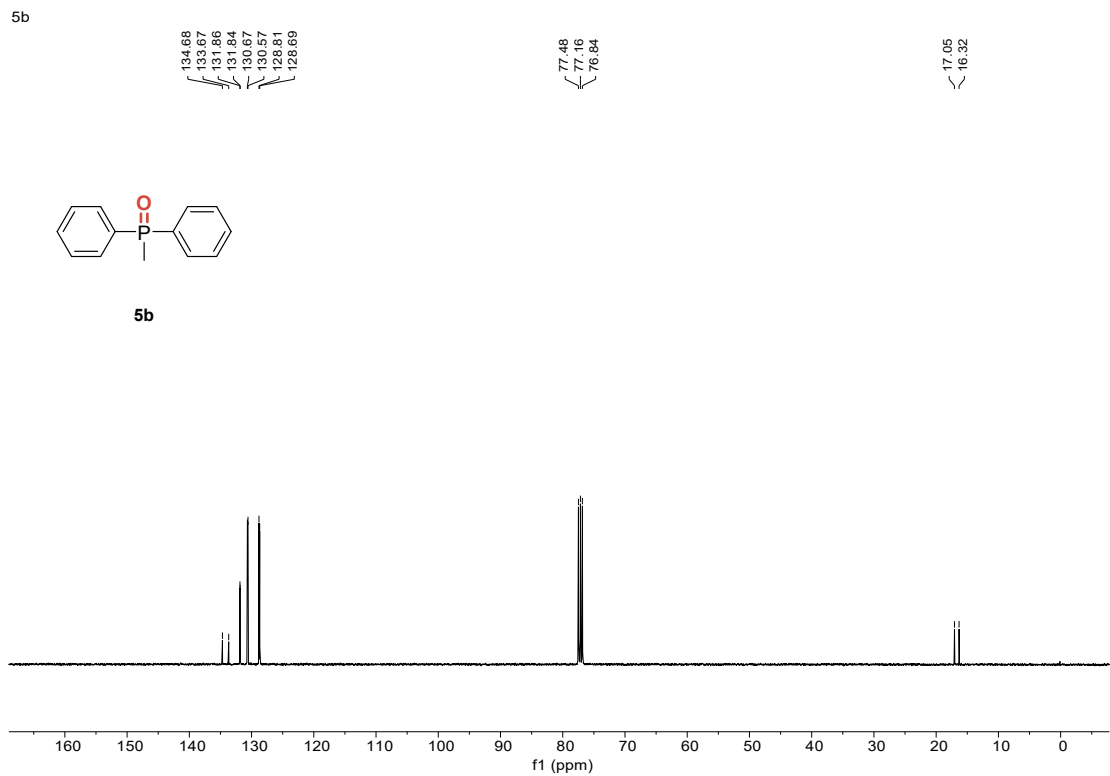

**Fig. S100**  $^{13}\text{C}$  NMR spectrum (101 MHz,  $\text{CDCl}_3$ ) of **5b**.

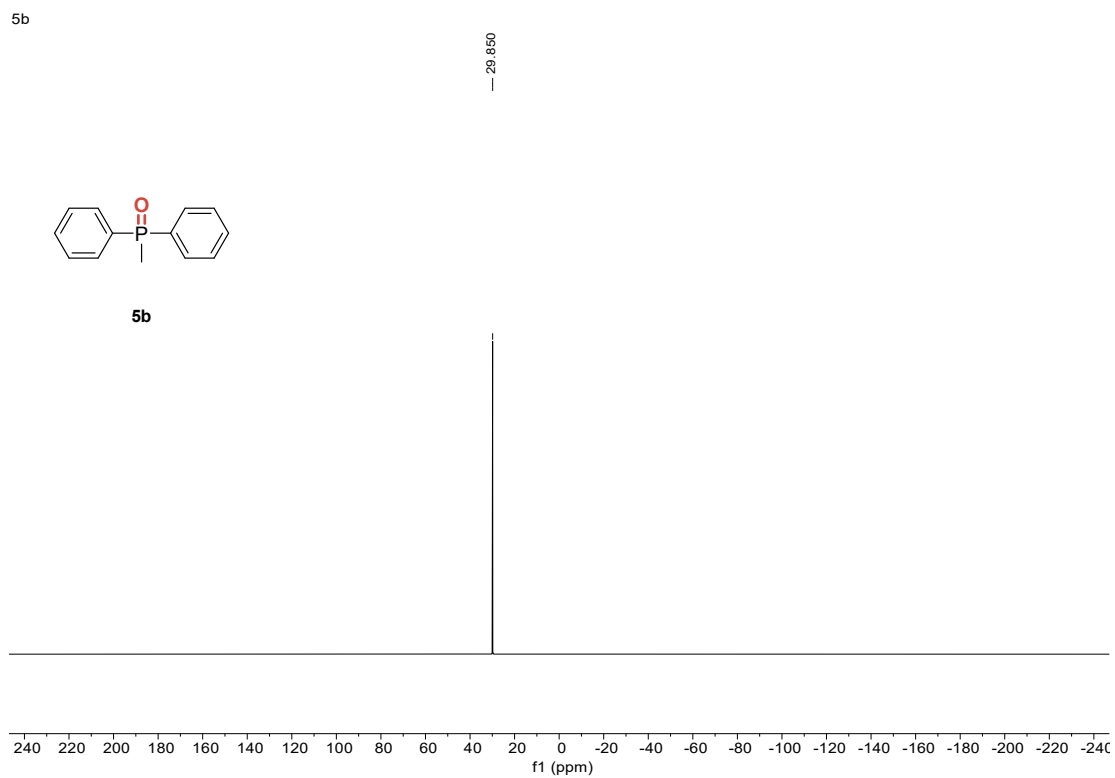

**Fig. S101**  $^{31}\text{P}$  NMR spectrum (202 MHz,  $\text{CDCl}_3$ ) of **5b**.

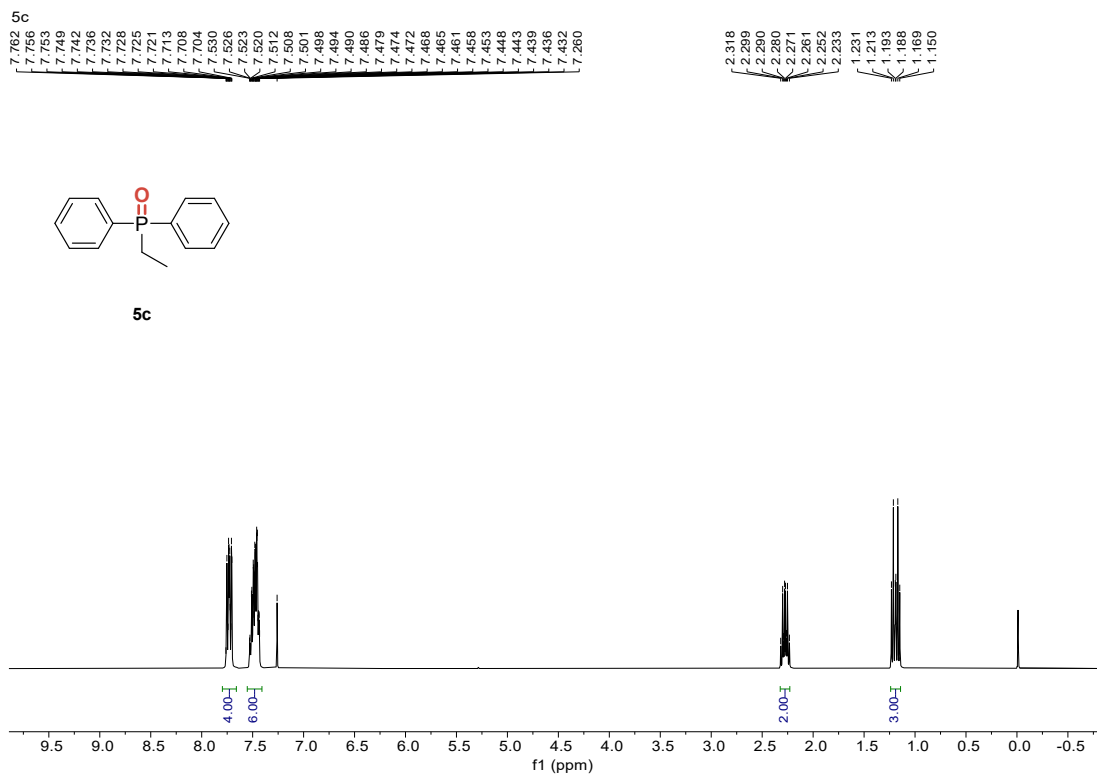

**Fig. S102** <sup>1</sup>H NMR spectrum (400 MHz, CDCl<sub>3</sub>) of **5c**.

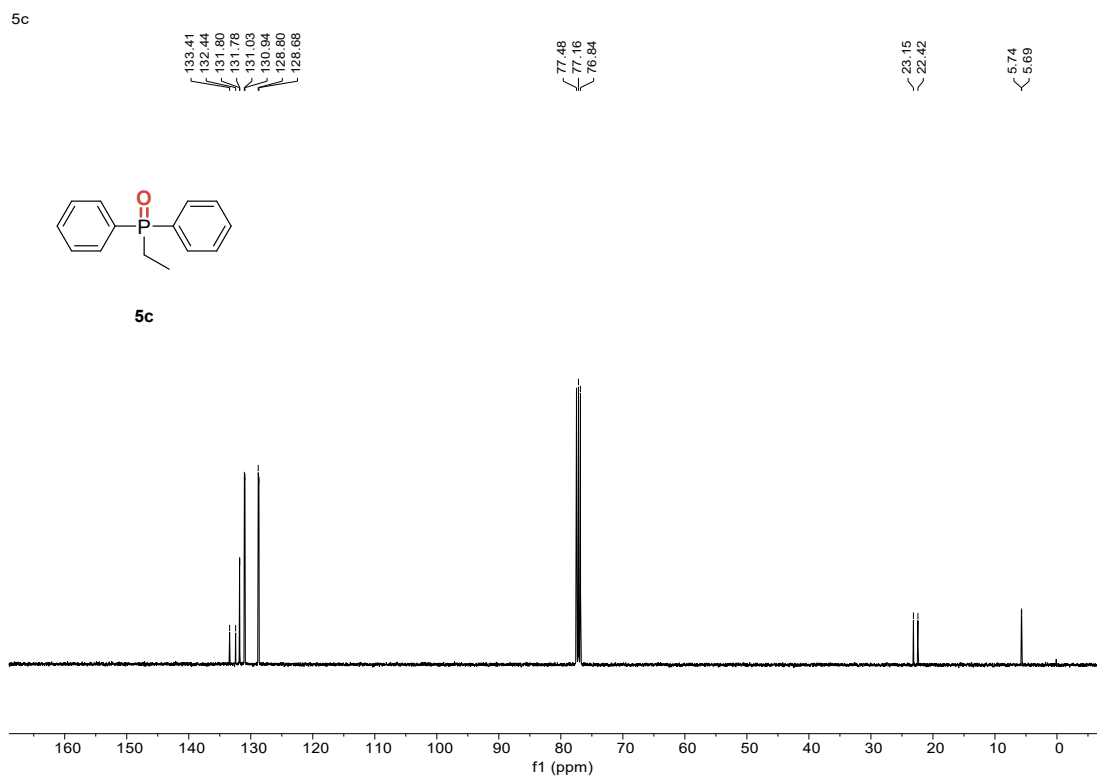

**Fig. S103** <sup>13</sup>C NMR spectrum (101 MHz, CDCl<sub>3</sub>) of **5c**.

5c

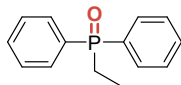

5c

- 34.085

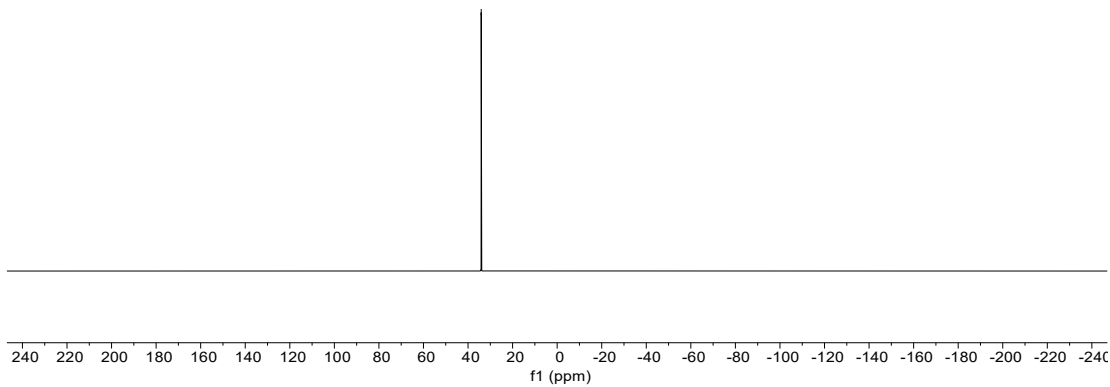

Fig. S104  $^{31}\text{P}$  NMR spectrum (202 MHz,  $\text{CDCl}_3$ ) of **5c**.

5d

7.741  
7.737  
7.733  
7.726  
7.724  
7.721  
7.712  
7.709  
7.705  
7.698  
7.692  
7.688  
7.505  
7.501  
7.486  
7.482  
7.469  
7.465  
7.463  
7.446  
7.434  
7.427  
7.418  
7.414  
7.411  
7.366  
7.260

2.273  
2.269  
2.265  
2.245  
2.232  
2.224  
2.215  
2.204  
1.895  
1.877  
1.858  
1.854  
1.836  
1.817  
1.614  
1.595  
1.577  
1.017  
1.014  
0.999  
0.986  
0.890  
0.877

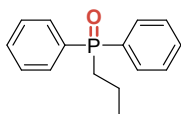

5d

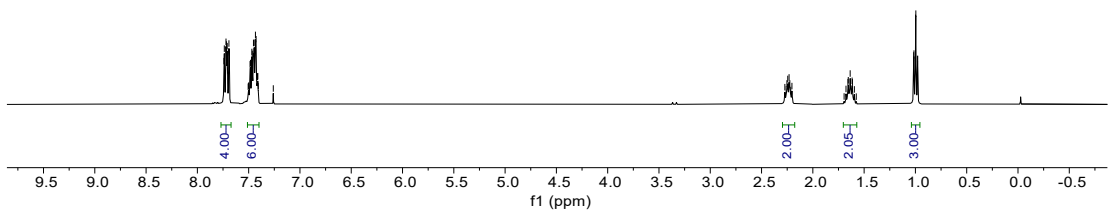

Fig. S105  $^1\text{H}$  NMR spectrum (400 MHz,  $\text{CDCl}_3$ ) of **5d**.

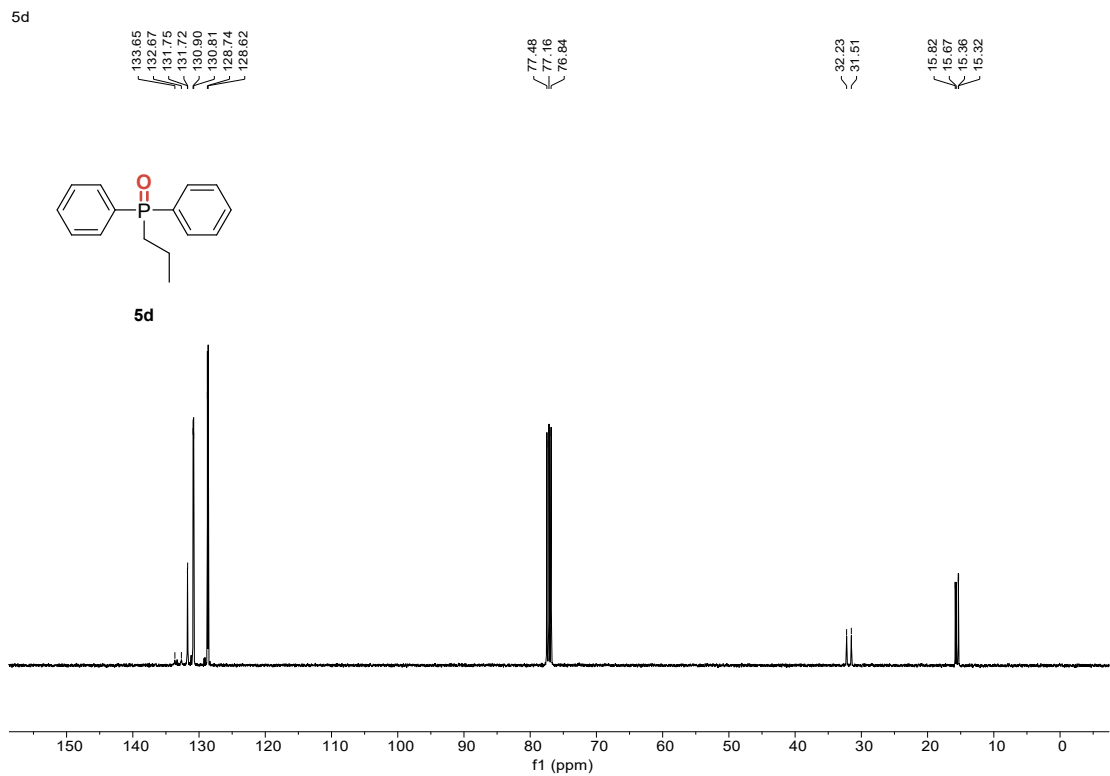

**Fig. S106**  $^{13}\text{C}$  NMR spectrum (101 MHz,  $\text{CDCl}_3$ ) of **5d**.

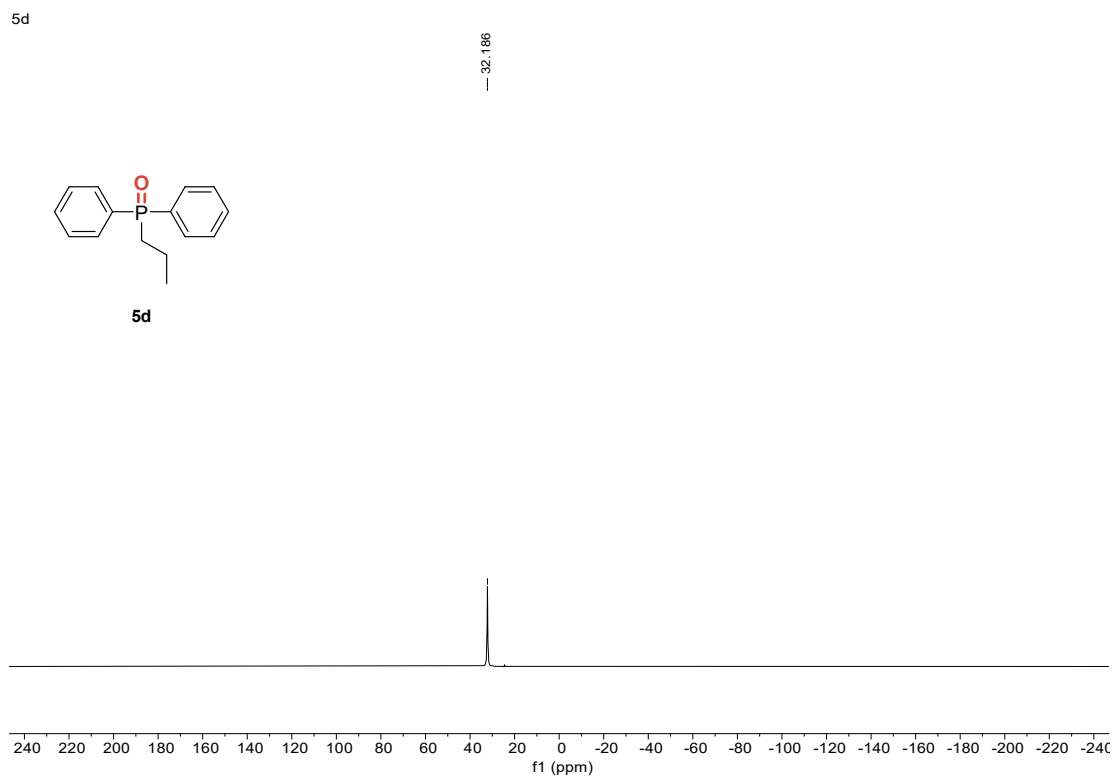

**Fig. S107**  $^{31}\text{P}$  NMR spectrum (202 MHz,  $\text{CDCl}_3$ ) of **5d**.

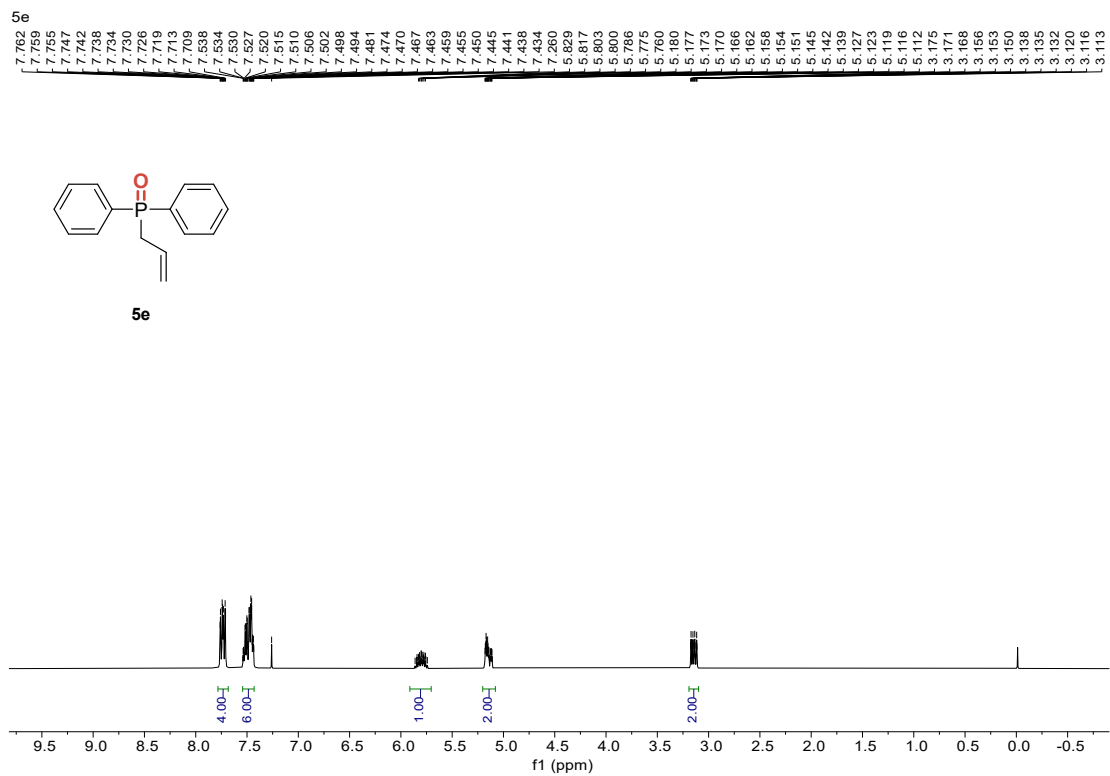

Fig. S108  $^1\text{H}$  NMR spectrum (400 MHz,  $\text{CDCl}_3$ ) of **5e**.

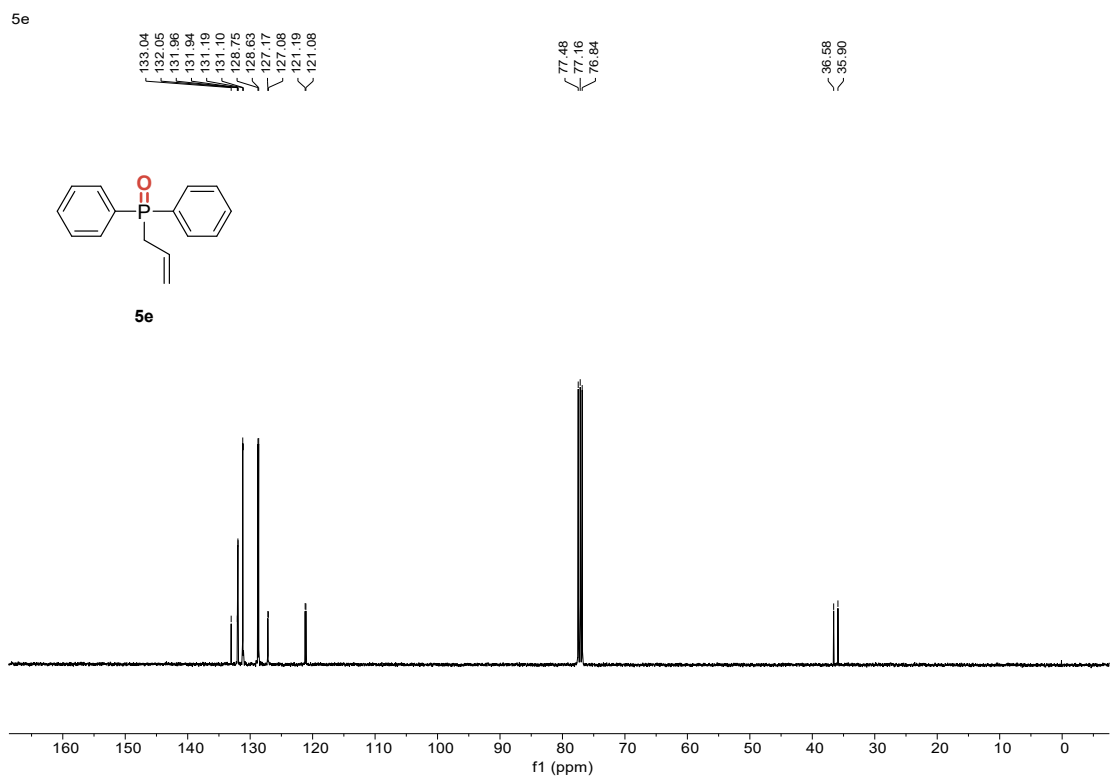

Fig. S109  $^{13}\text{C}$  NMR spectrum (101 MHz,  $\text{CDCl}_3$ ) of **5e**.

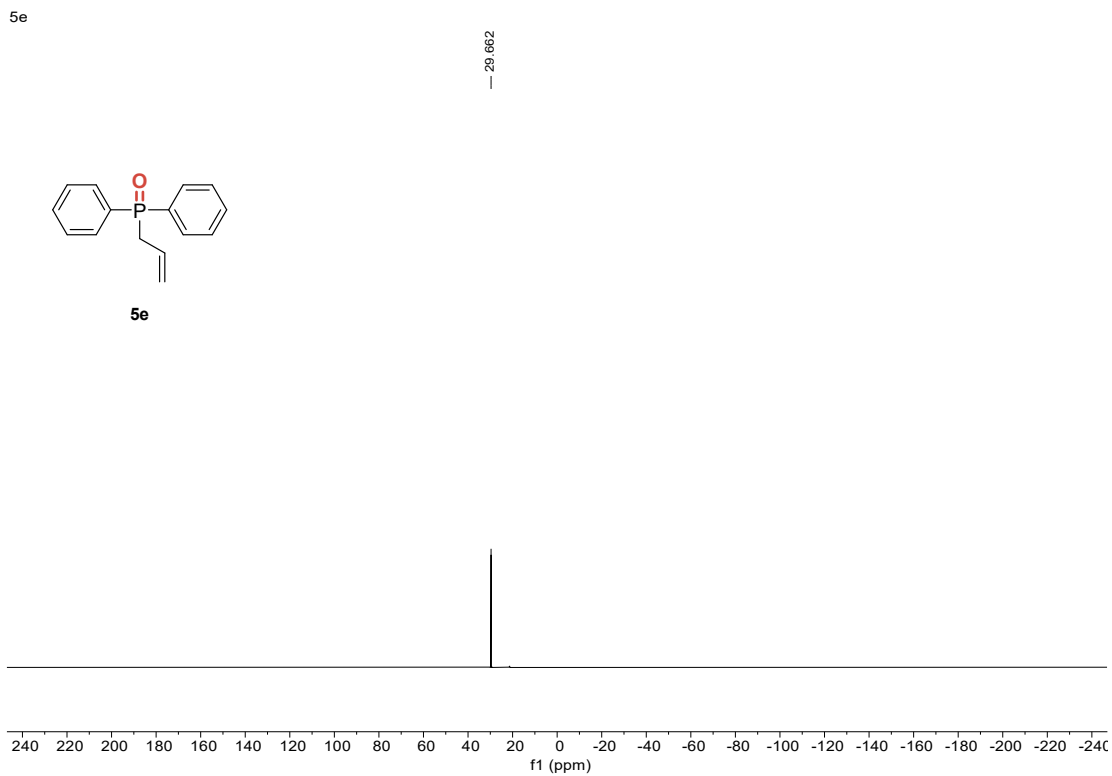

Fig. S110  $^{31}\text{P}$  NMR spectrum (202 MHz,  $\text{CDCl}_3$ ) of **5e**.

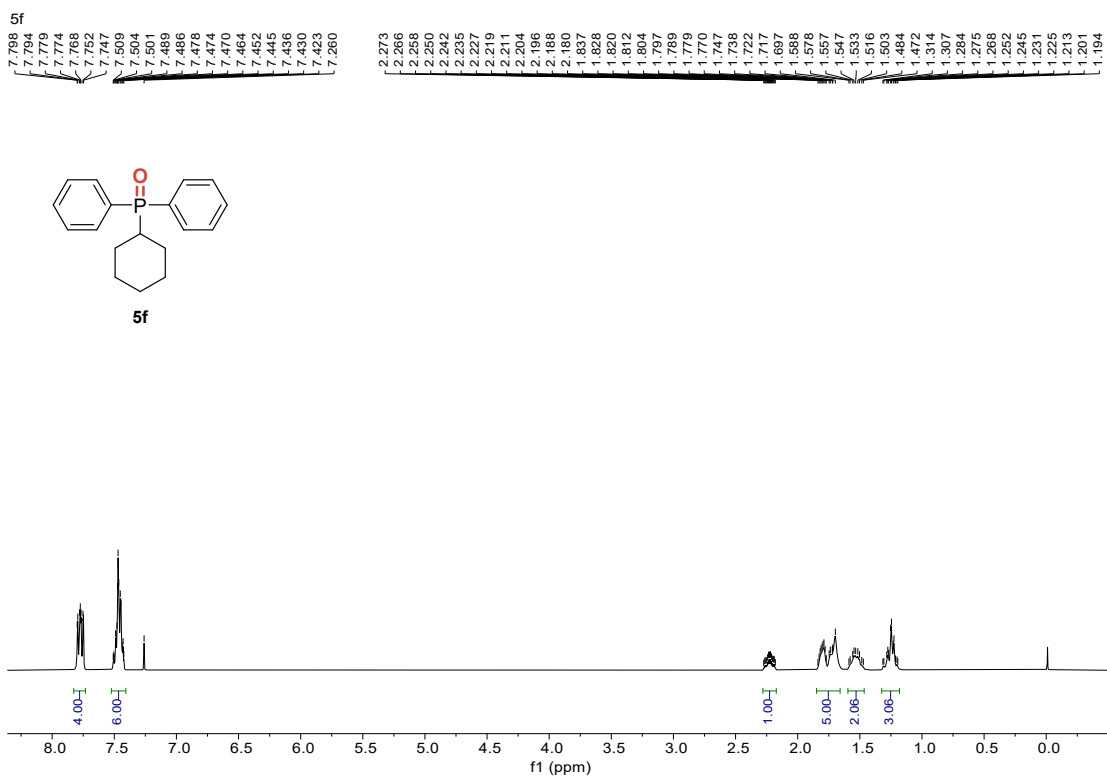

Fig. S111  $^1\text{H}$  NMR spectrum (400 MHz,  $\text{CDCl}_3$ ) of **5f**.



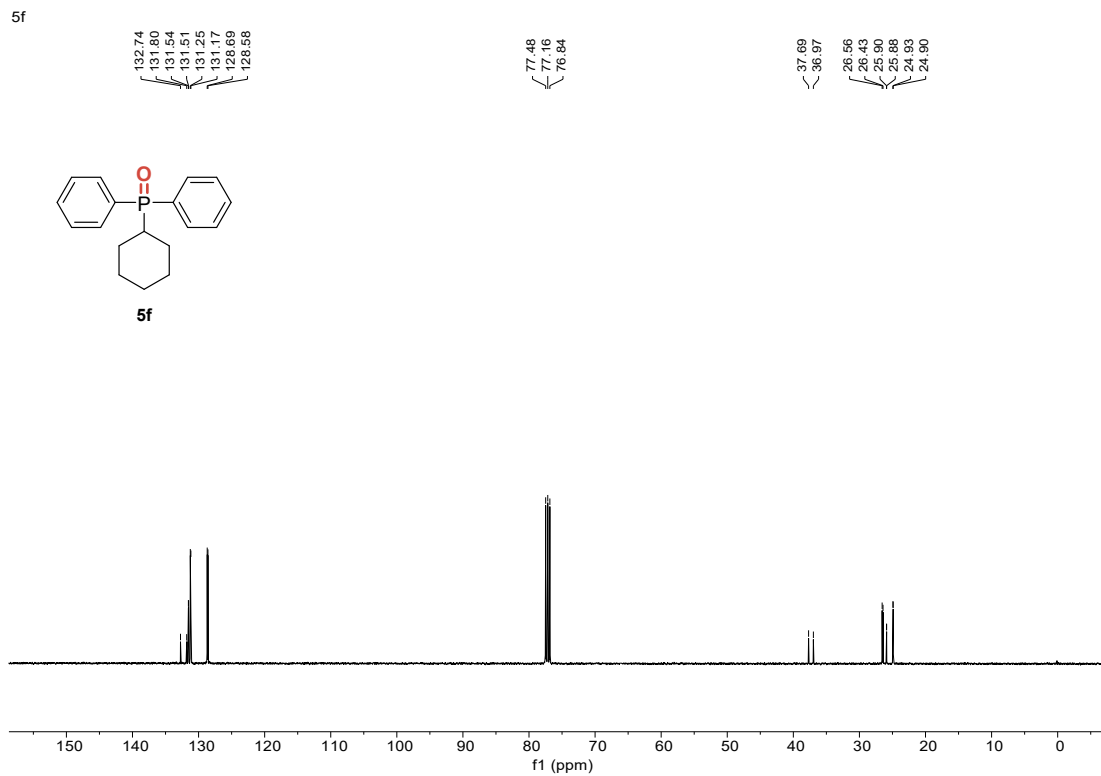

**Fig. S112**  $^{13}\text{C}$  NMR spectrum (101 MHz,  $\text{CDCl}_3$ ) of **5f**.

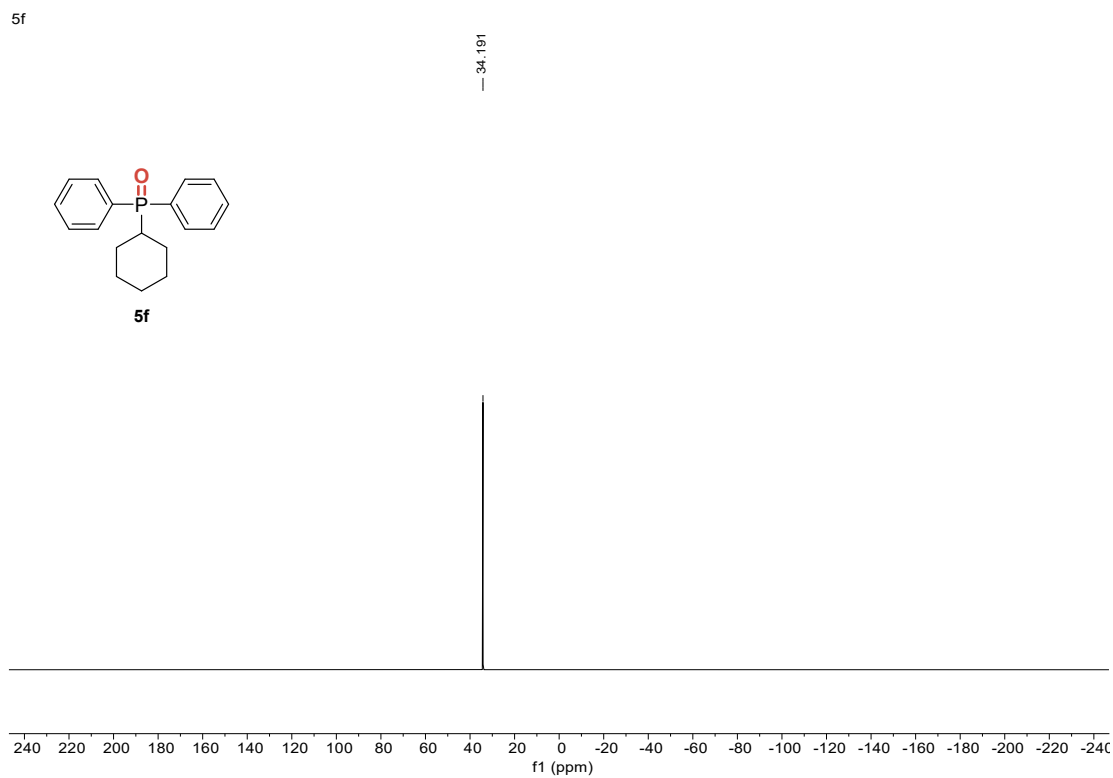

**Fig. S113**  $^{31}\text{P}$  NMR spectrum (202 MHz,  $\text{CDCl}_3$ ) of **5f**.

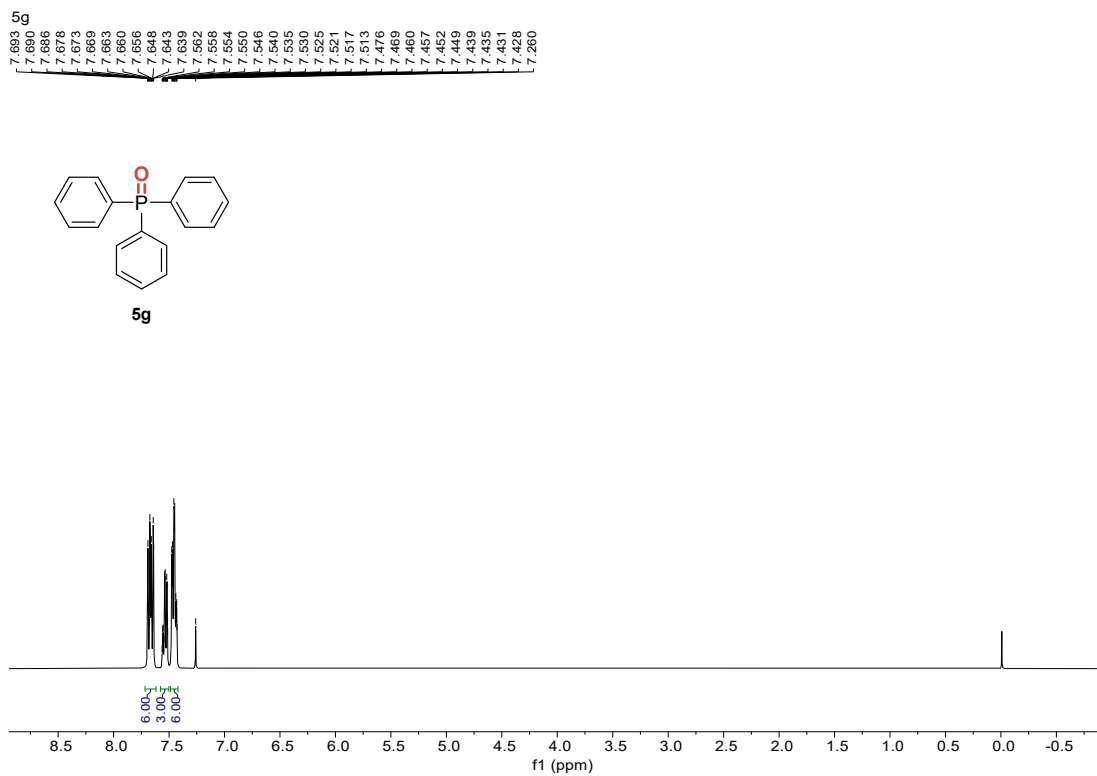

Fig. S114  $^1\text{H}$  NMR spectrum (400 MHz,  $\text{CDCl}_3$ ) of **5g**.

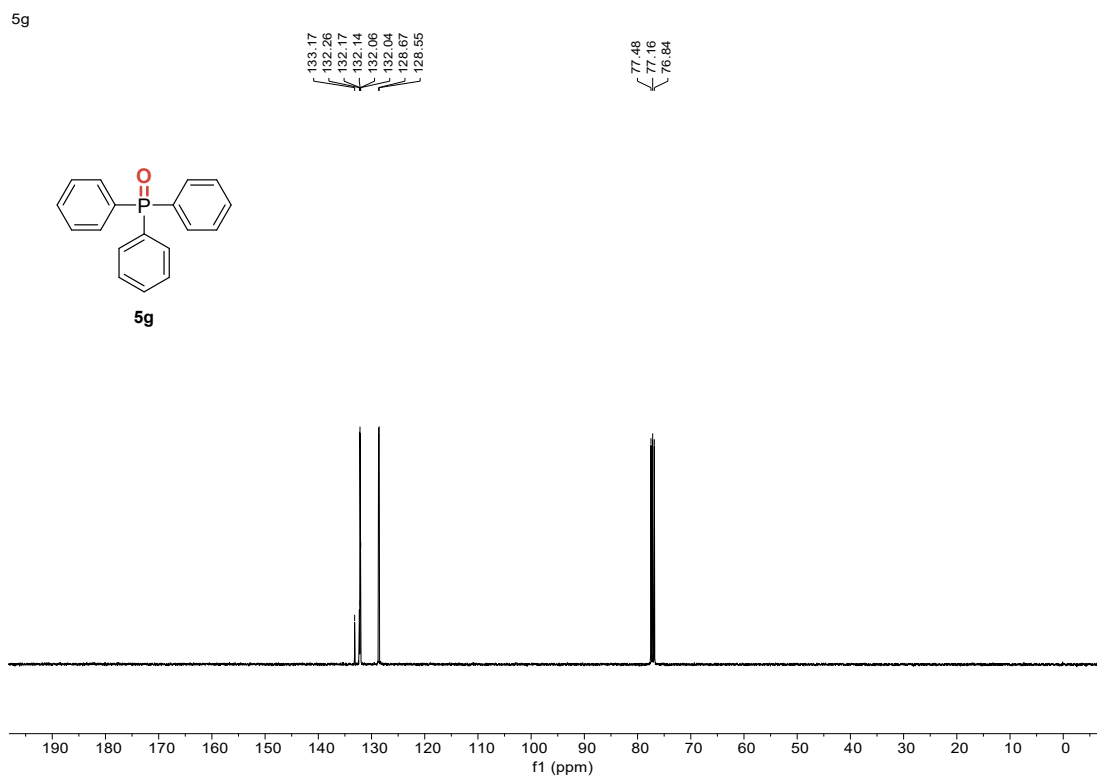

Fig. S115  $^{13}\text{C}$  NMR spectrum (101 MHz,  $\text{CDCl}_3$ ) of **5g**.

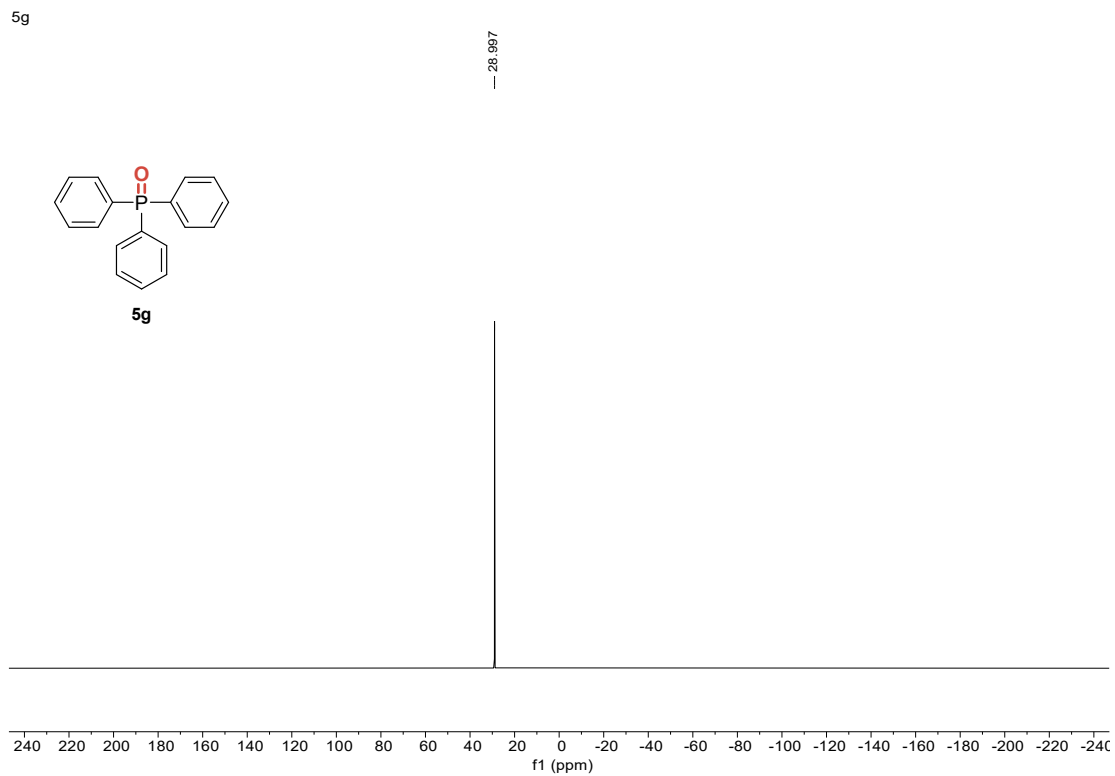

Fig. S116  $^{31}\text{P}$  NMR spectrum (202 MHz,  $\text{CDCl}_3$ ) of **5g**.

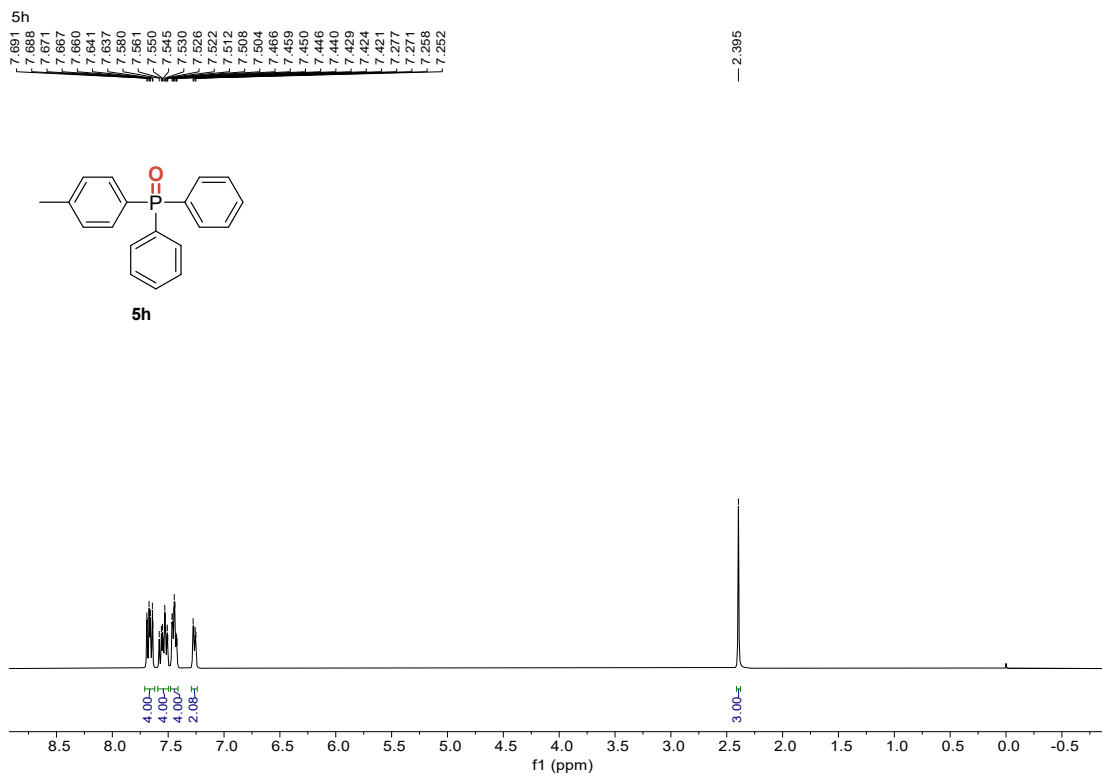

Fig. S117  $^1\text{H}$  NMR spectrum (400 MHz,  $\text{CDCl}_3$ ) of **5h**.

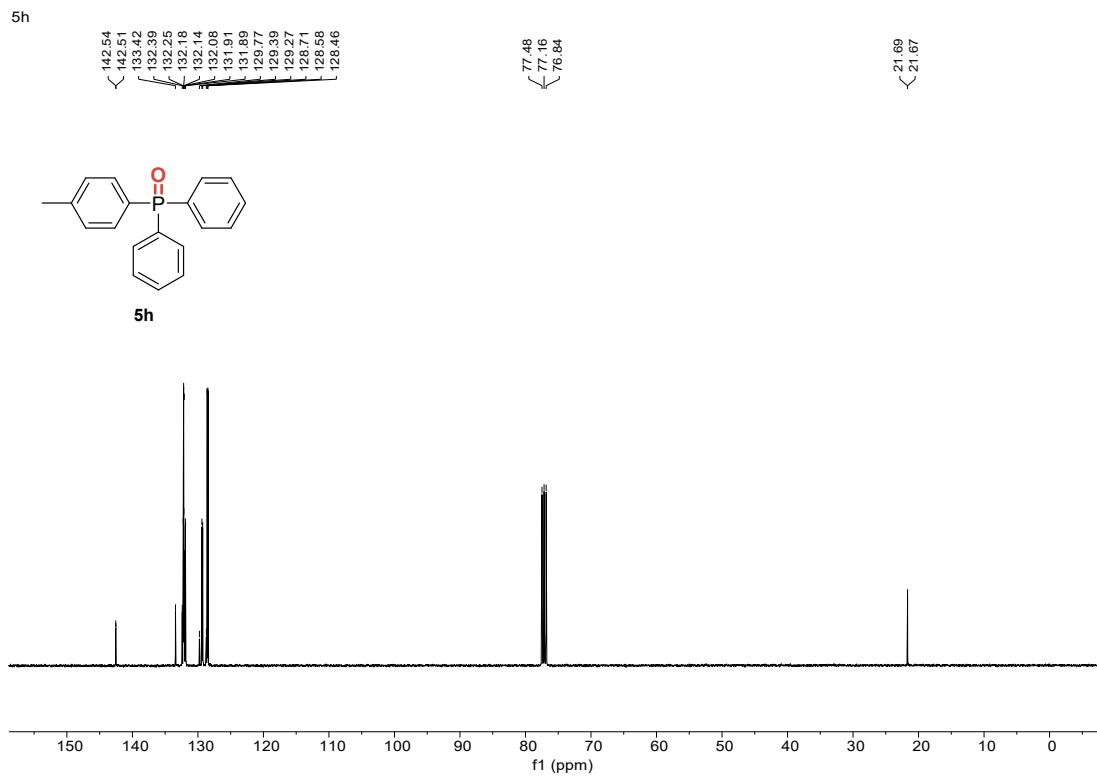

**Fig. S118**  $^{13}\text{C}$  NMR spectrum (101 MHz,  $\text{CDCl}_3$ ) of **5h**.

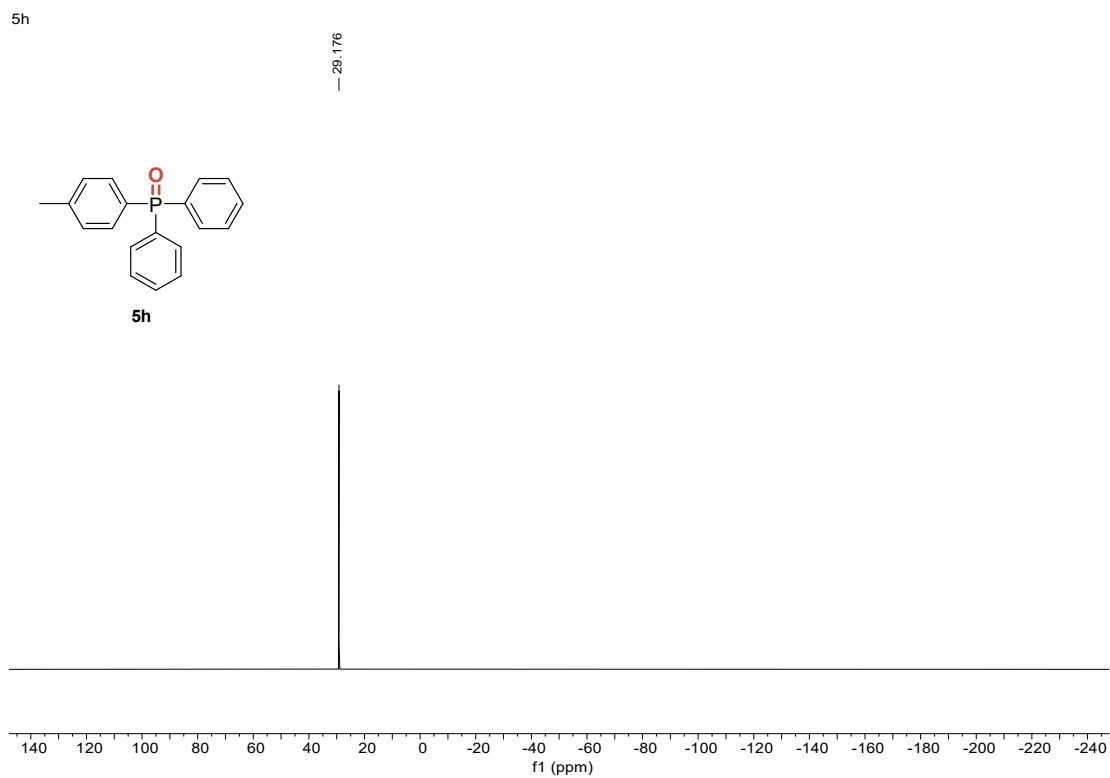

**Fig. S119**  $^{31}\text{P}$  NMR spectrum (243 MHz,  $\text{CDCl}_3$ ) of **5h**.

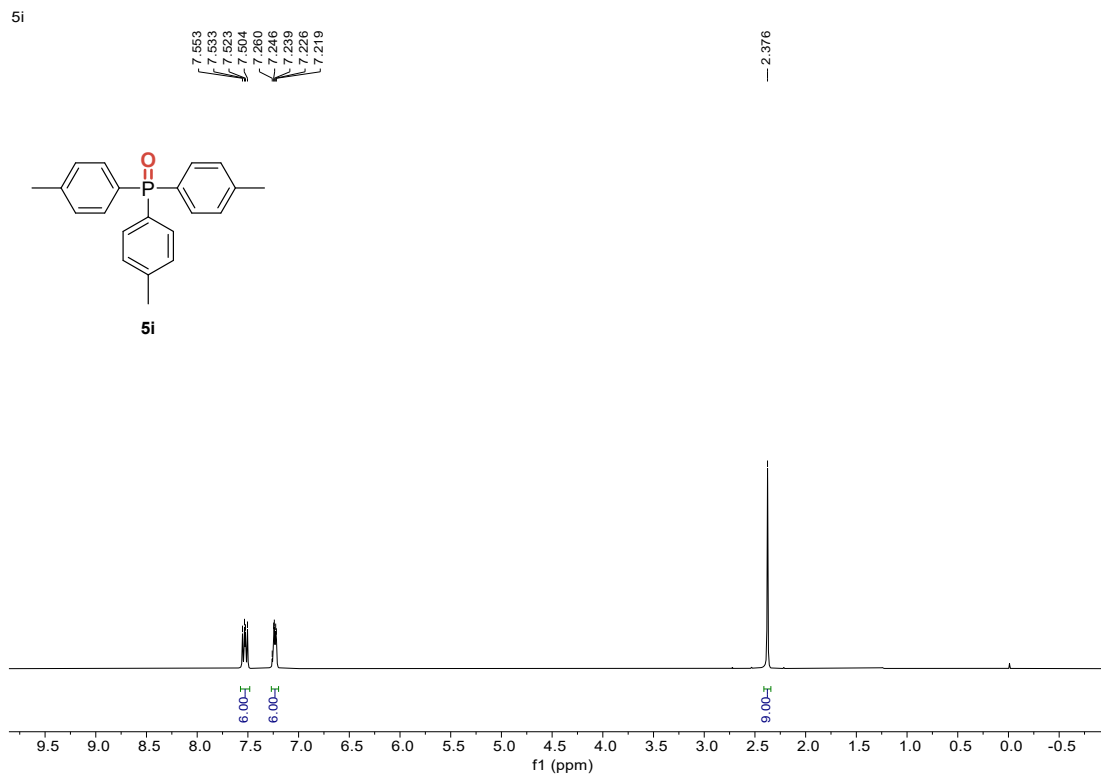

**Fig. S120**  $^1\text{H}$  NMR spectrum (400 MHz,  $\text{CDCl}_3$ ) of **5i**.

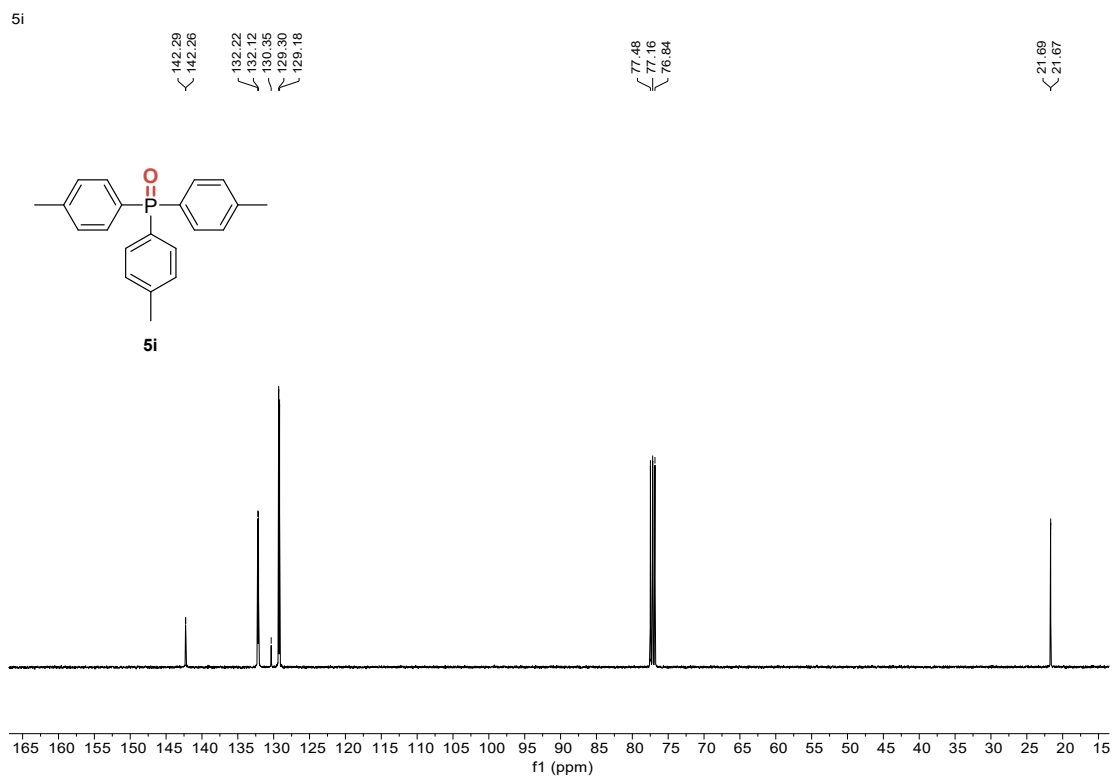

**Fig. S121**  $^{13}\text{C}$  NMR spectrum (101 MHz,  $\text{CDCl}_3$ ) of **5i**.

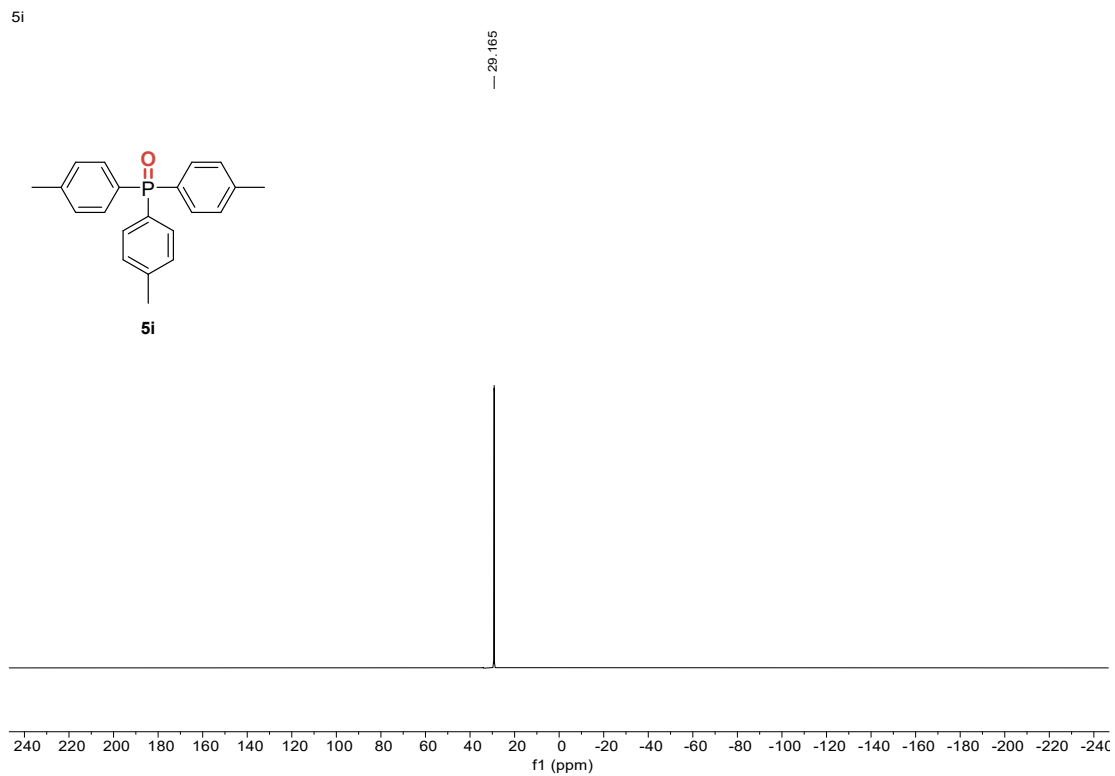

**Fig. S122**  $^{31}\text{P}$  NMR spectrum (202 MHz,  $\text{CDCl}_3$ ) of **5i**.

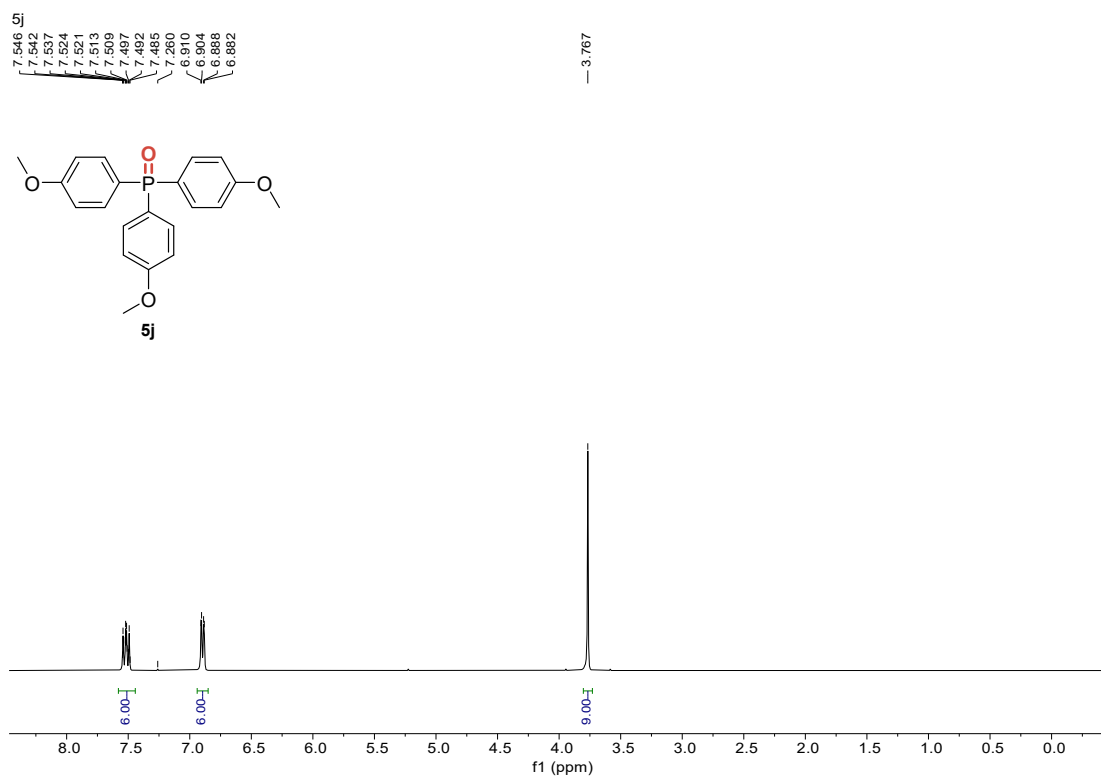

**Fig. S123**  $^1\text{H}$  NMR spectrum (400 MHz,  $\text{CDCl}_3$ ) of **5j**.

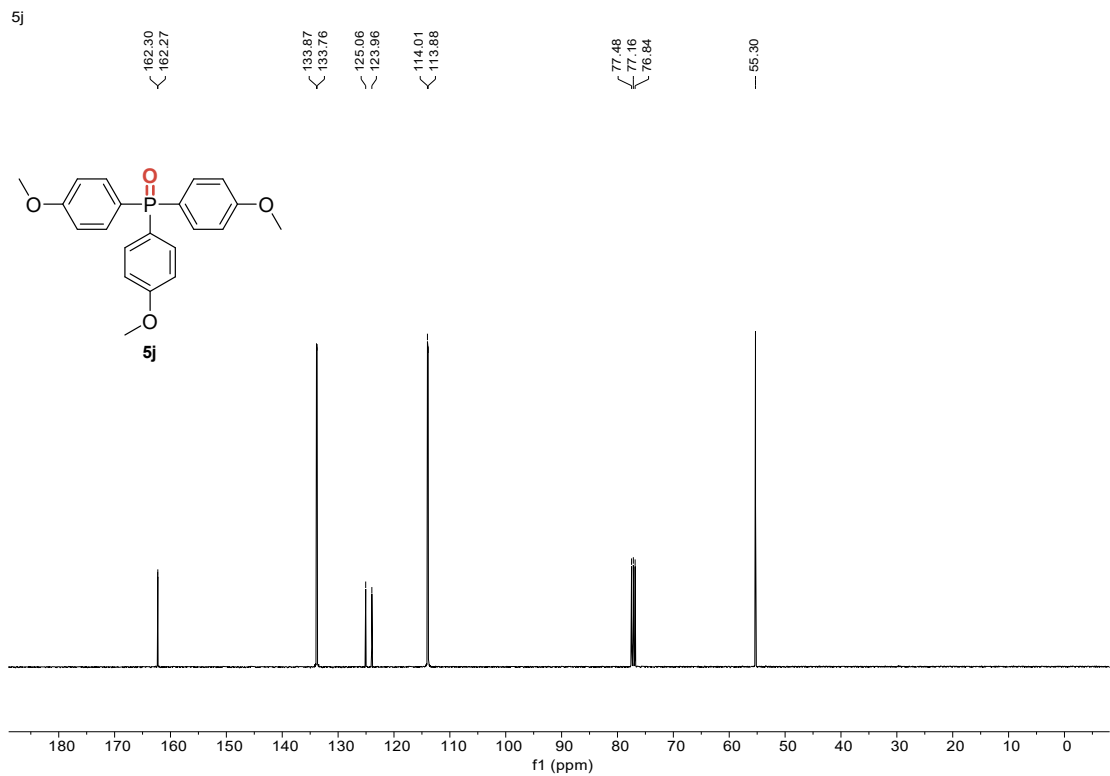

**Fig. S124**  $^{13}\text{C}$  NMR spectrum (101 MHz,  $\text{CDCl}_3$ ) of **5j**.

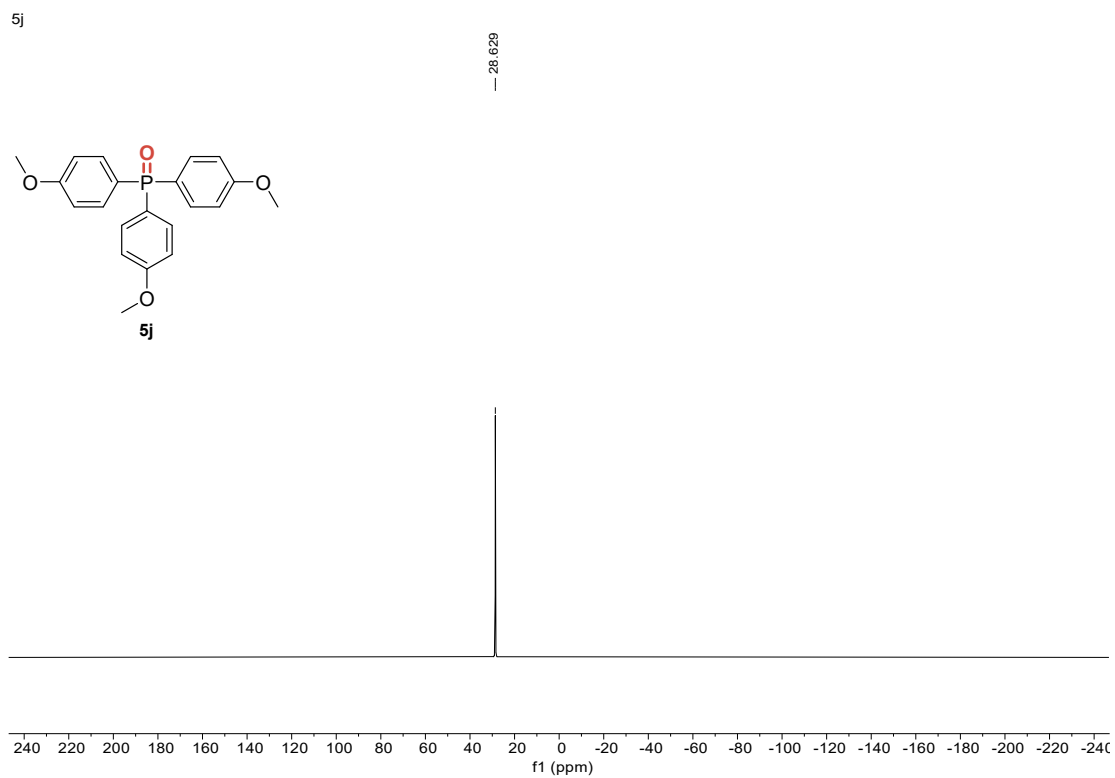

**Fig. S125**  $^{31}\text{P}$  NMR spectrum (202 MHz,  $\text{CDCl}_3$ ) of **5j**.

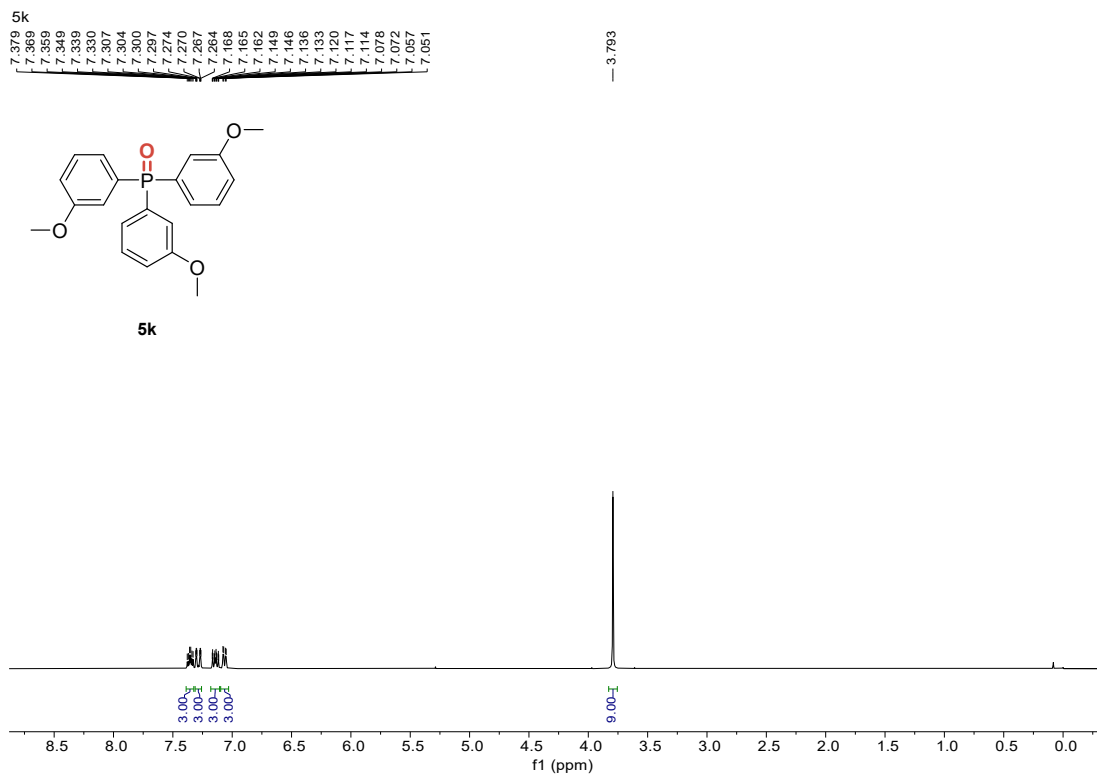

Fig. S126  $^1\text{H}$  NMR spectrum (400 MHz,  $\text{CDCl}_3$ ) of **5k**.

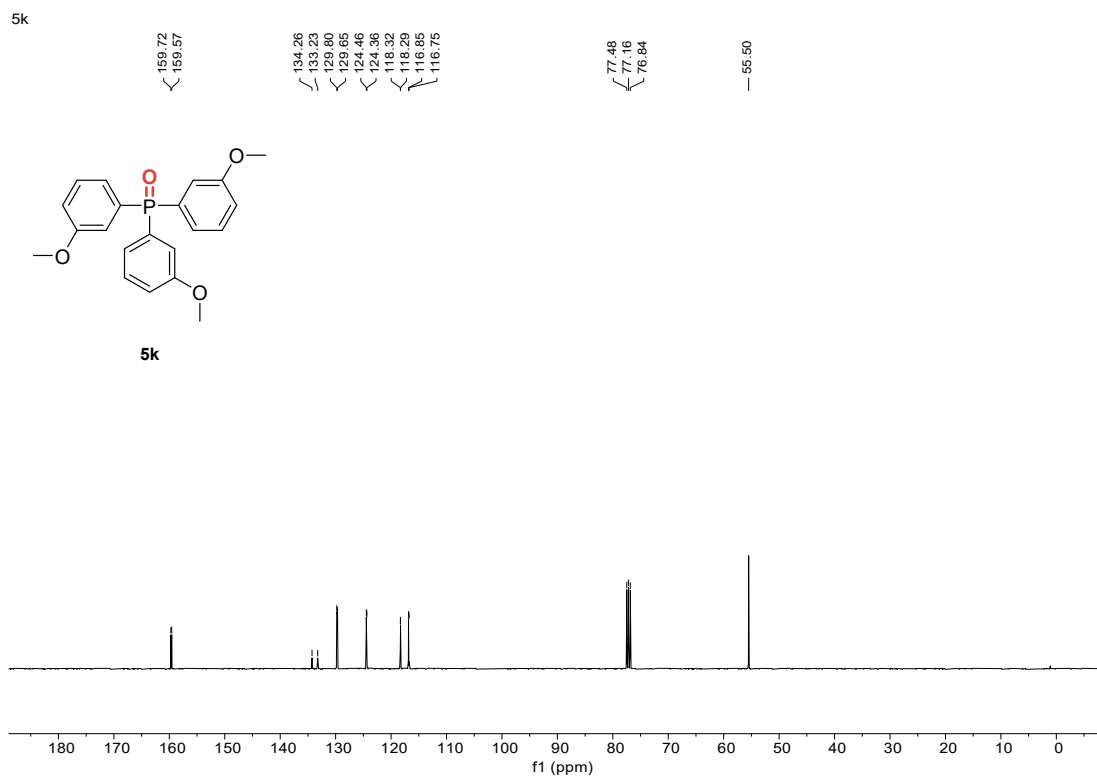

Fig. S127  $^{13}\text{C}$  NMR spectrum (101 MHz,  $\text{CDCl}_3$ ) of **5k**.



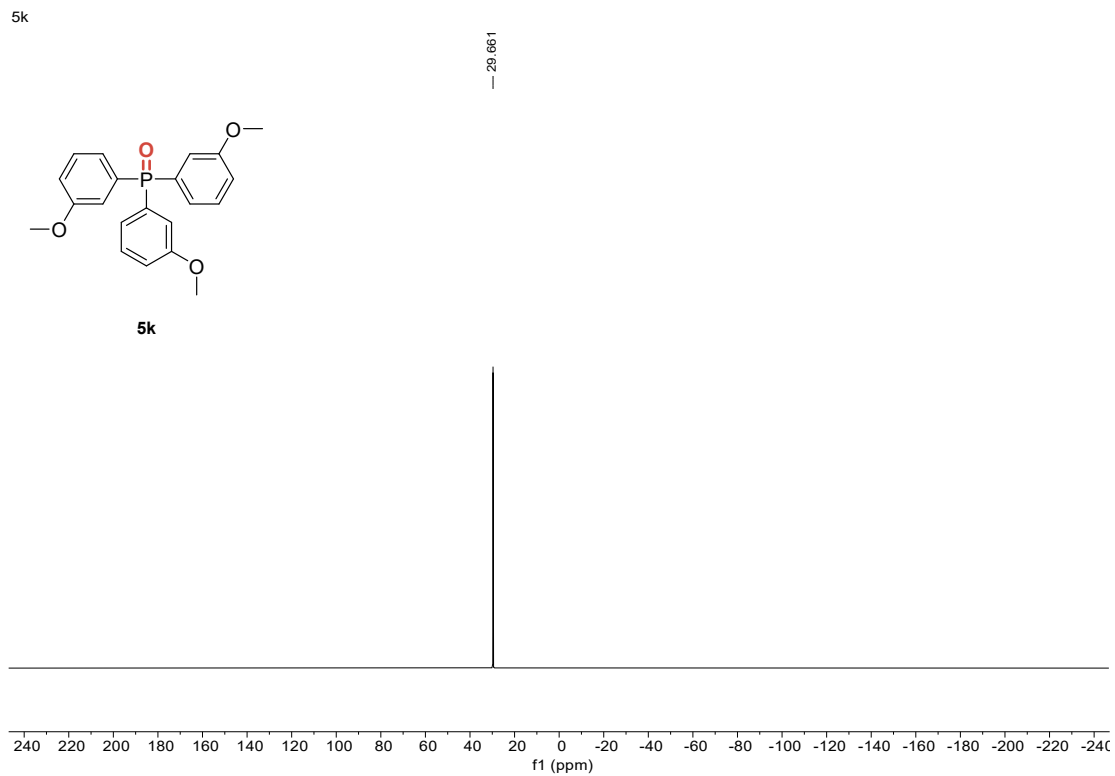

**Fig. S128** <sup>31</sup>P NMR spectrum (202 MHz, CDCl<sub>3</sub>) of **5k**.

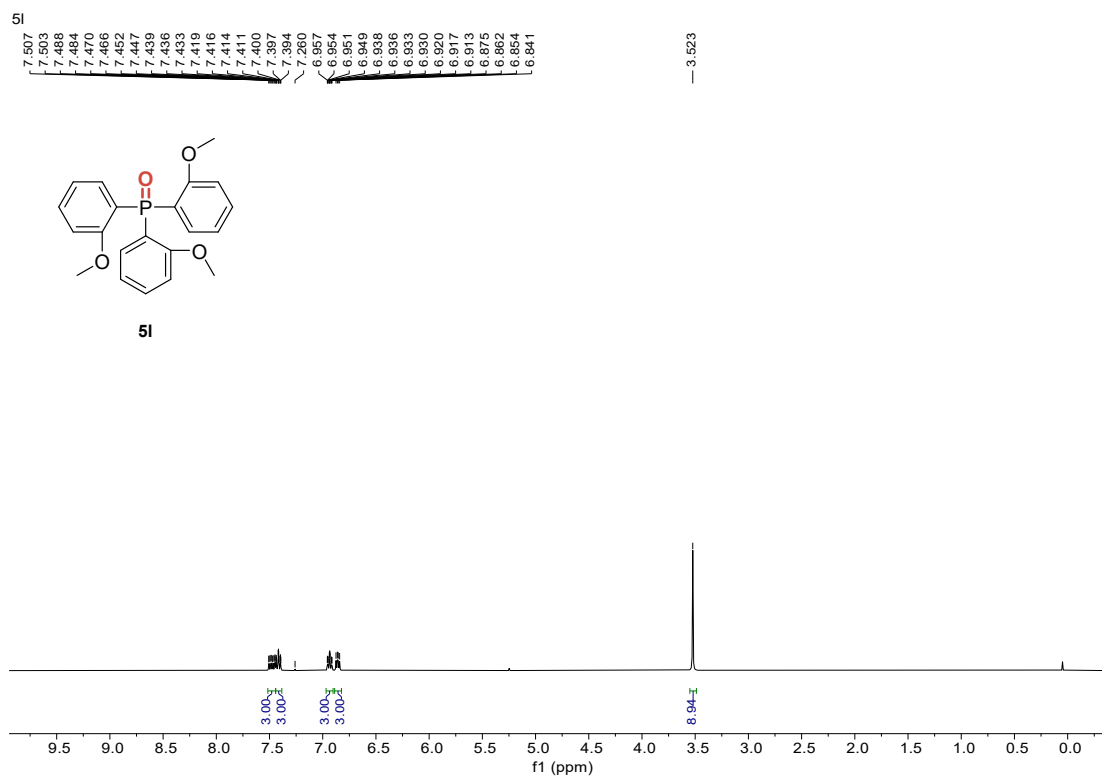

**Fig. S129** <sup>1</sup>H NMR spectrum (400 MHz, CDCl<sub>3</sub>) of **5l**.

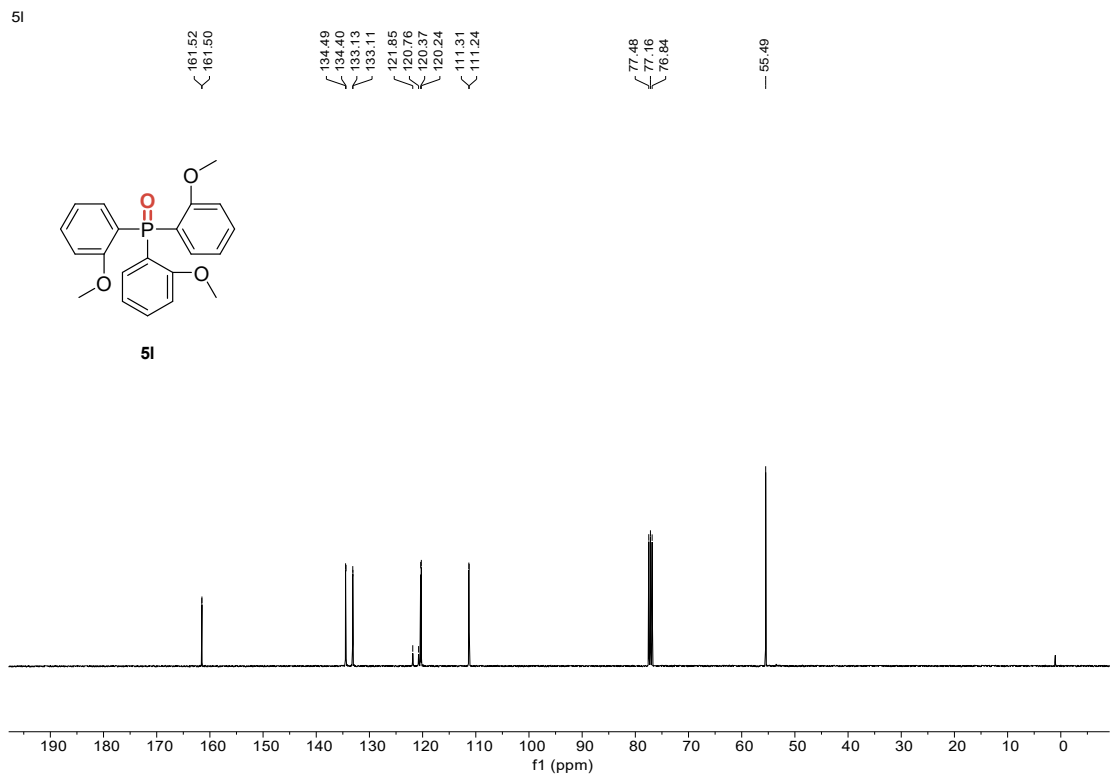

**Fig. S130**  $^{13}\text{C}$  NMR spectrum (101 MHz,  $\text{CDCl}_3$ ) of **51**.

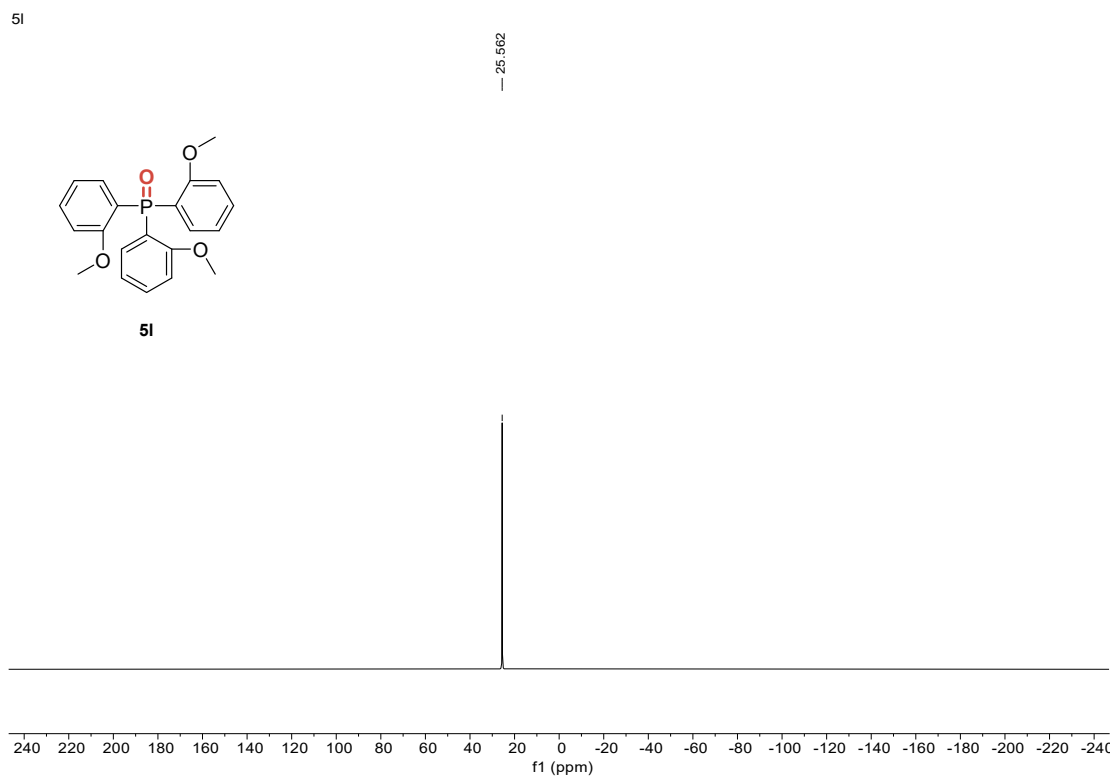

**Fig. S131**  $^{31}\text{P}$  NMR spectrum (202 MHz,  $\text{CDCl}_3$ ) of **51**.

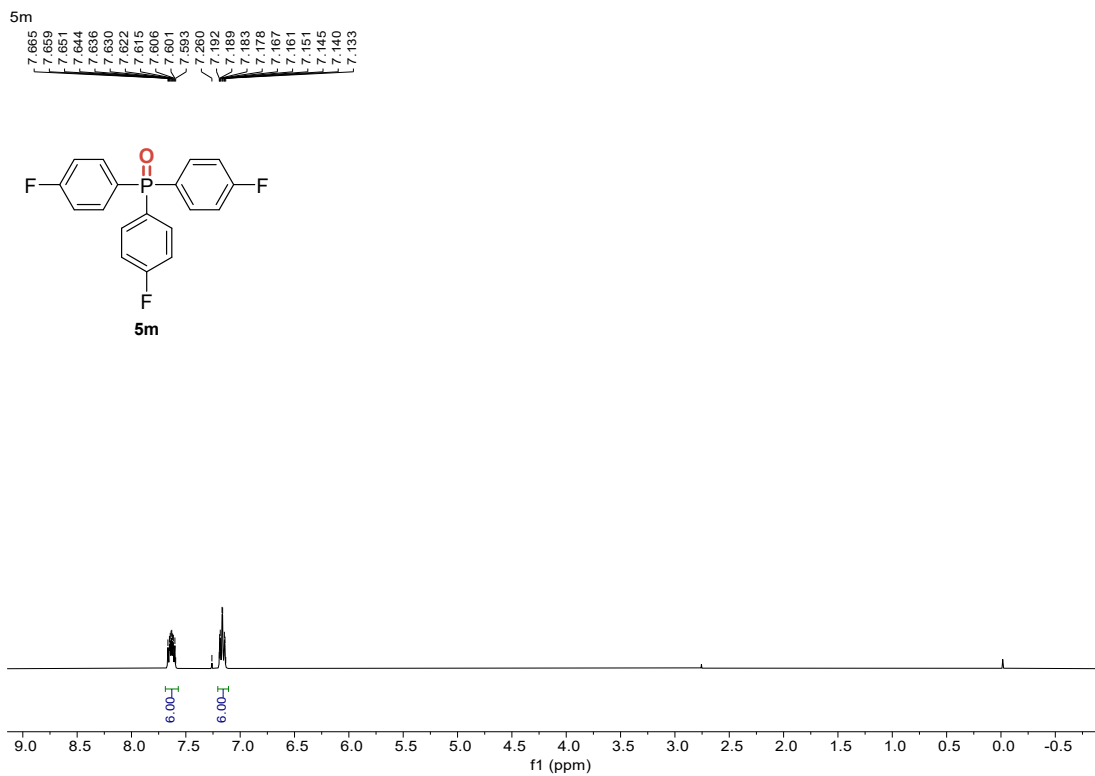

Fig. S132  $^1\text{H}$  NMR spectrum (400 MHz,  $\text{CDCl}_3$ ) of **5m**.

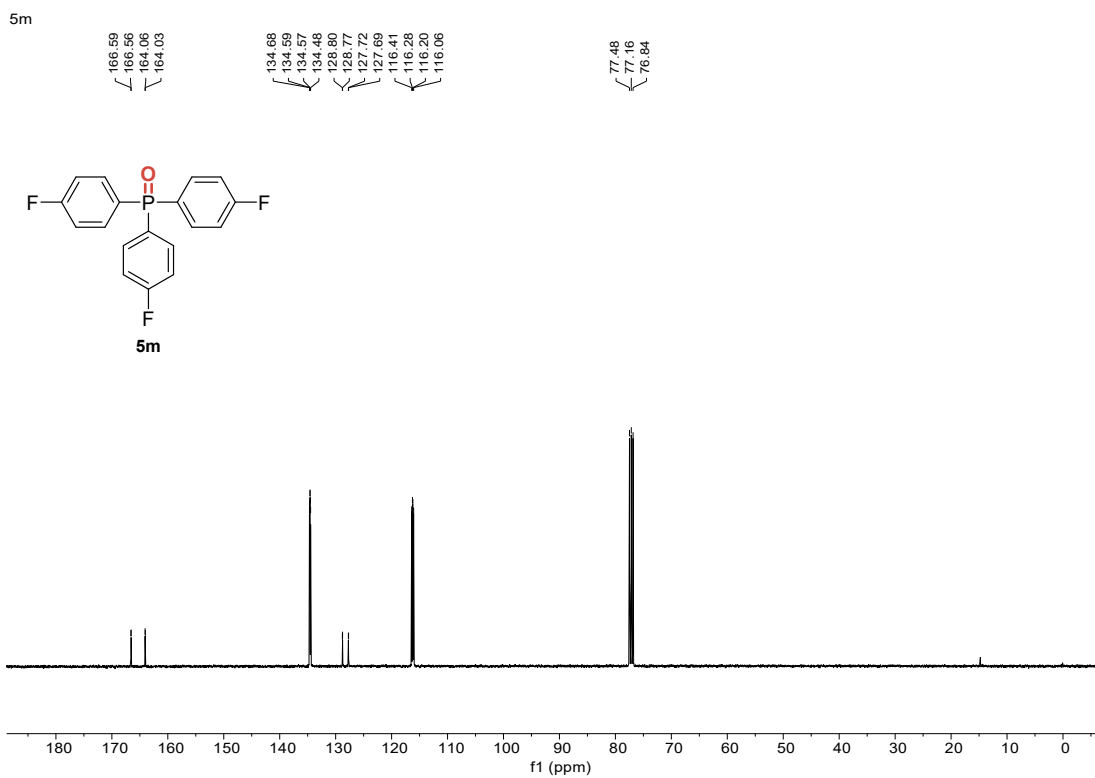

Fig. S133  $^{13}\text{C}$  NMR spectrum (101 MHz,  $\text{CDCl}_3$ ) of **5m**.

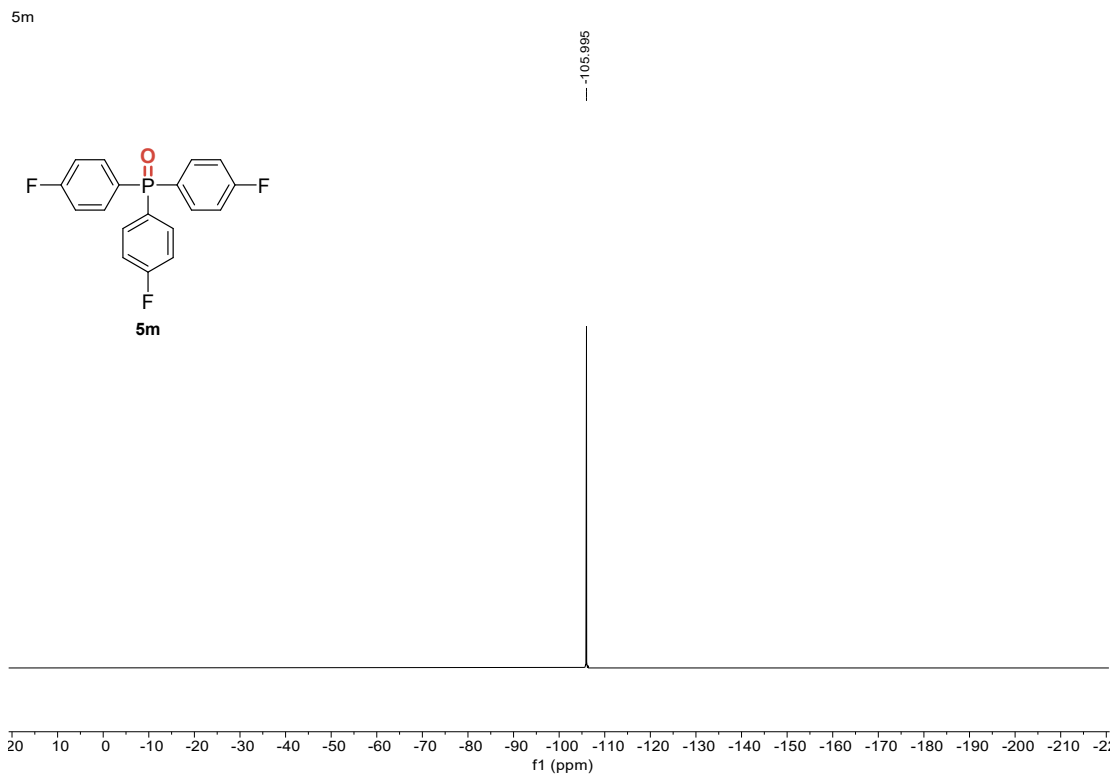

**Fig. S134**  $^{19}\text{F}$  NMR spectrum (471 MHz,  $\text{CDCl}_3$ ) of **5m**.

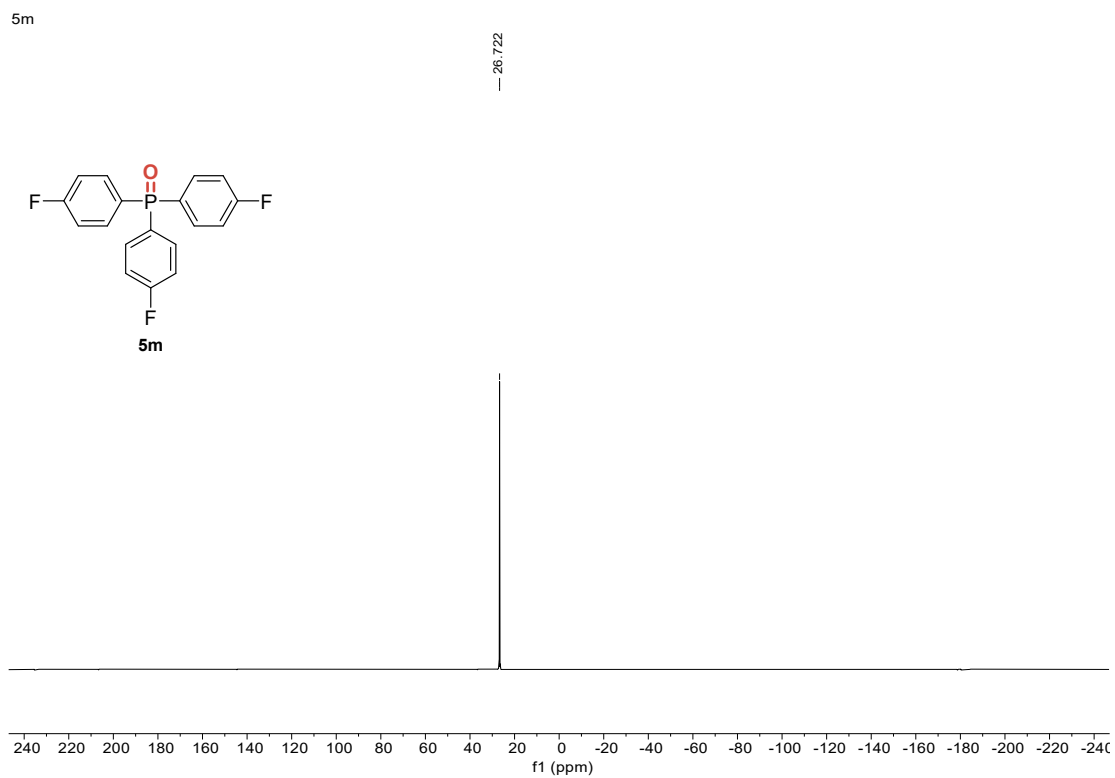

**Fig. S135**  $^{31}\text{P}$  NMR spectrum (202 MHz,  $\text{CDCl}_3$ ) of **5m**.

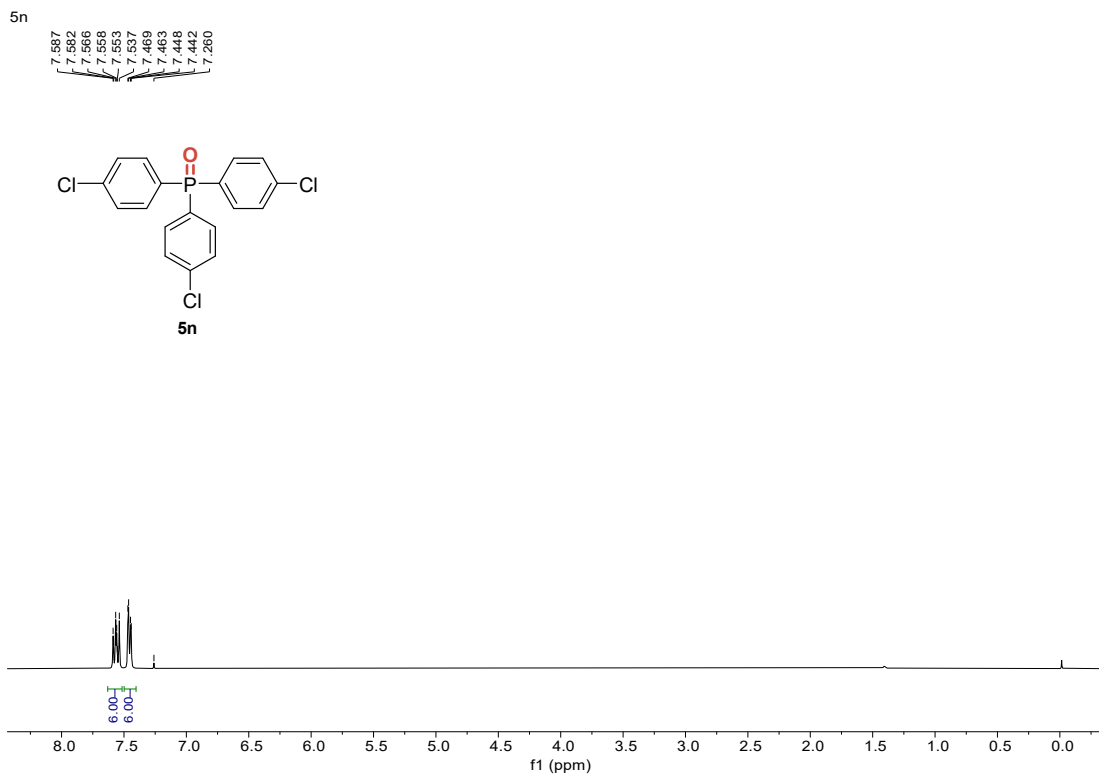

Fig. S136  $^1\text{H}$  NMR spectrum (400 MHz,  $\text{CDCl}_3$ ) of **5n**.

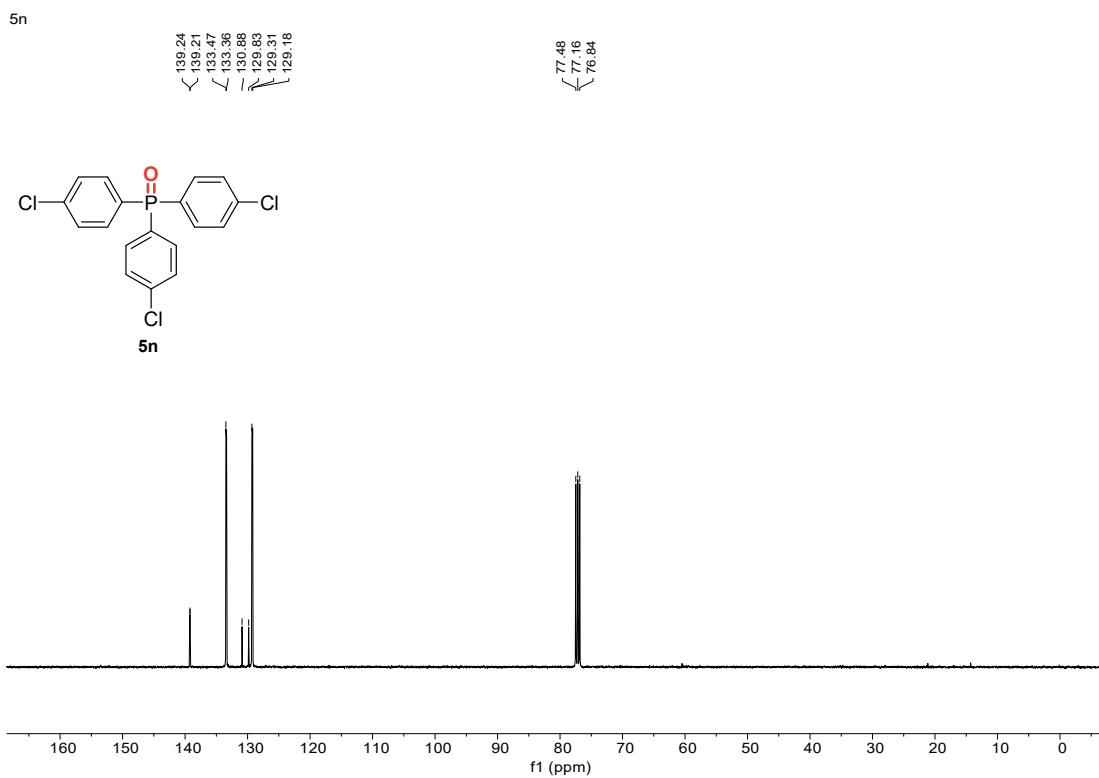

Fig. S137  $^{13}\text{C}$  NMR spectrum (101 MHz,  $\text{CDCl}_3$ ) of **5n**.

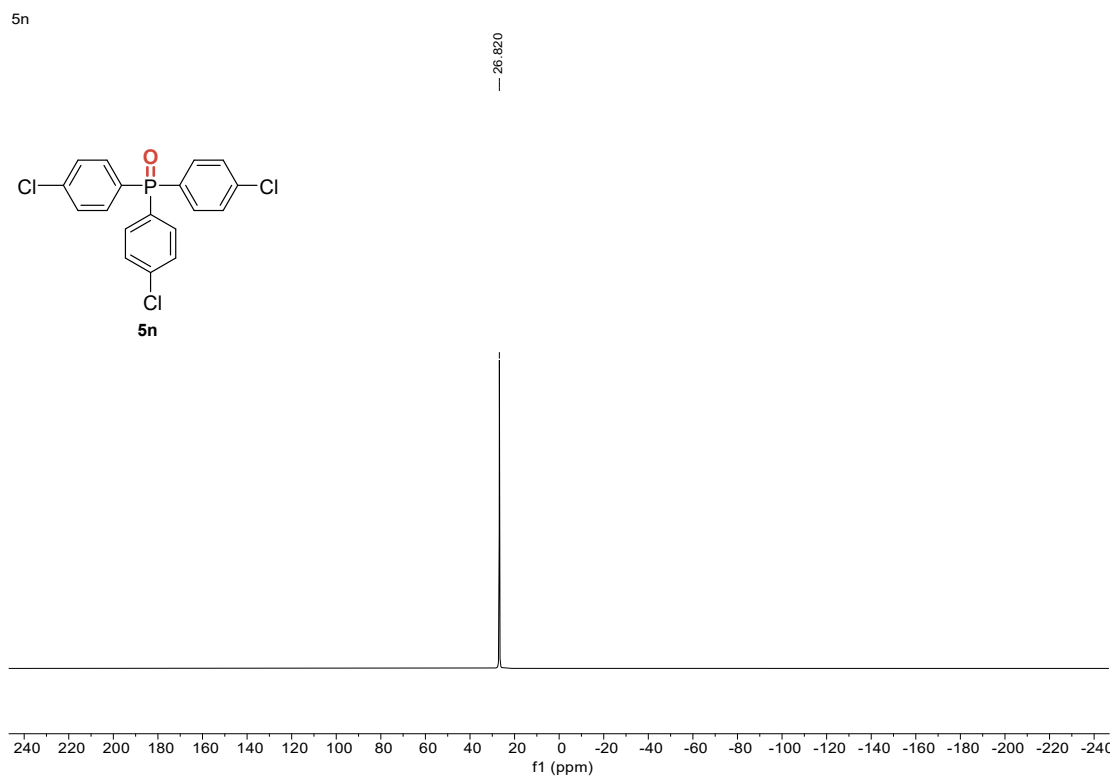

**Fig. S138**  $^{31}\text{P}$  NMR spectrum (202 MHz,  $\text{CDCl}_3$ ) of **5n**.

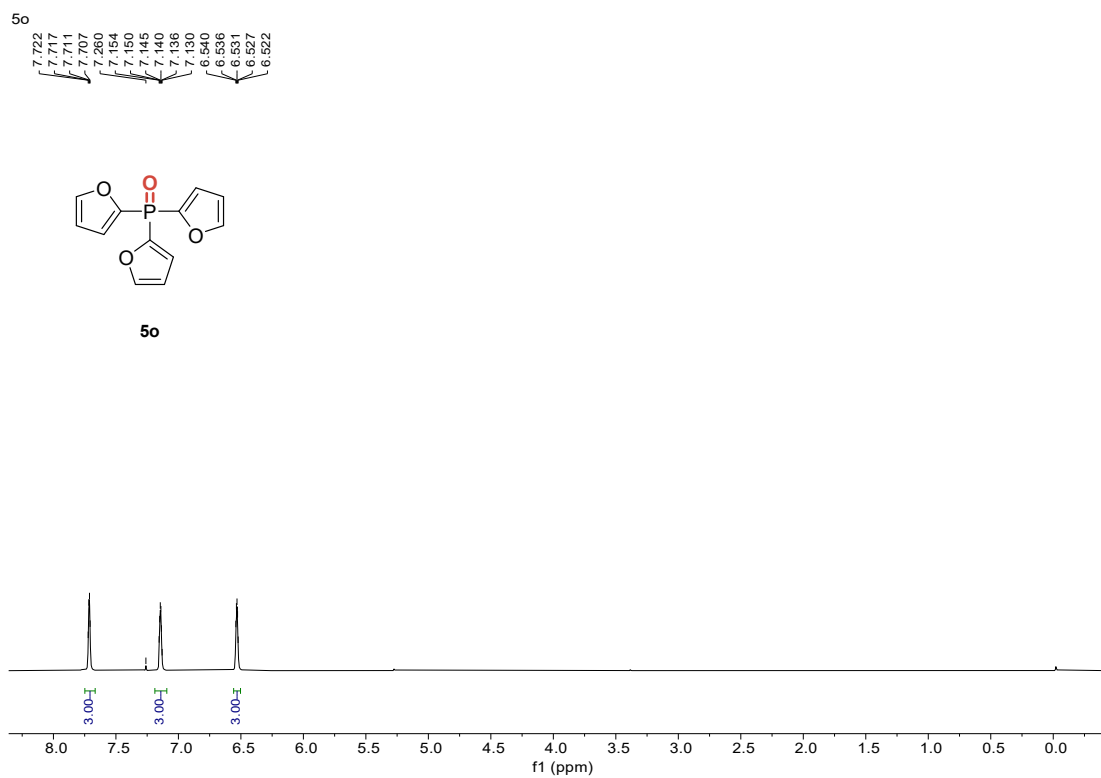

**Fig. S139**  $^1\text{H}$  NMR spectrum (400 MHz,  $\text{CDCl}_3$ ) of **5o**.

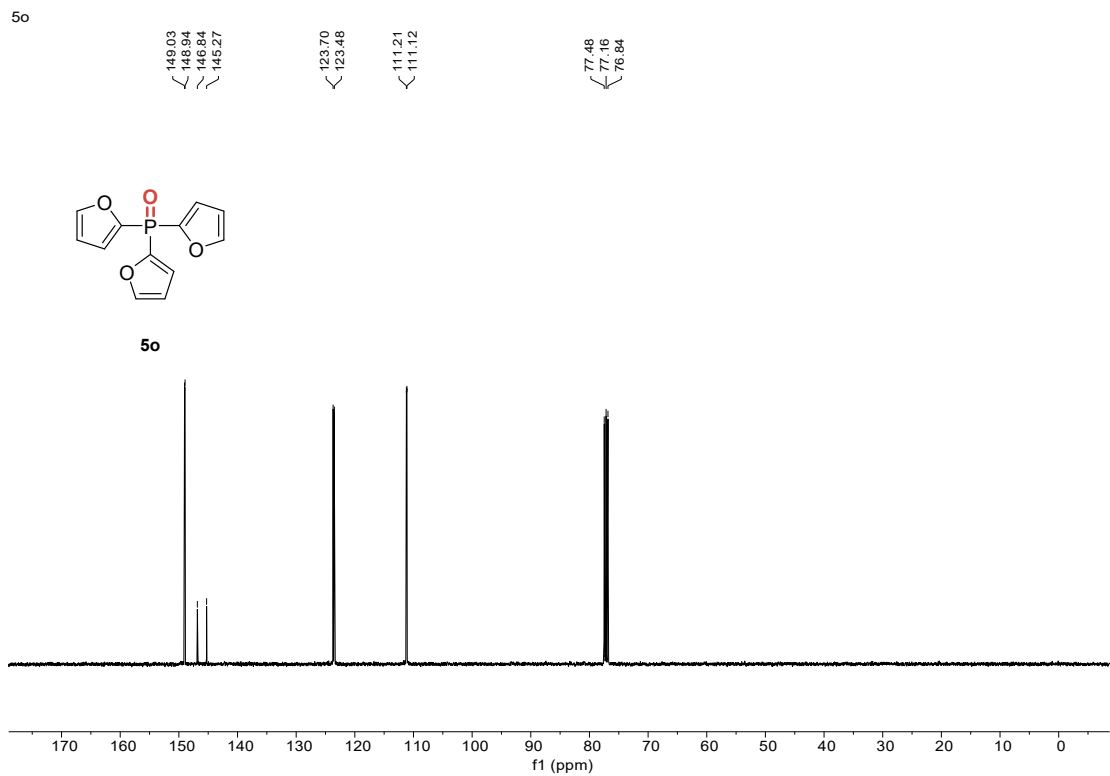

**Fig. S140**  $^{13}\text{C}$  NMR spectrum (101 MHz,  $\text{CDCl}_3$ ) of **5o**.

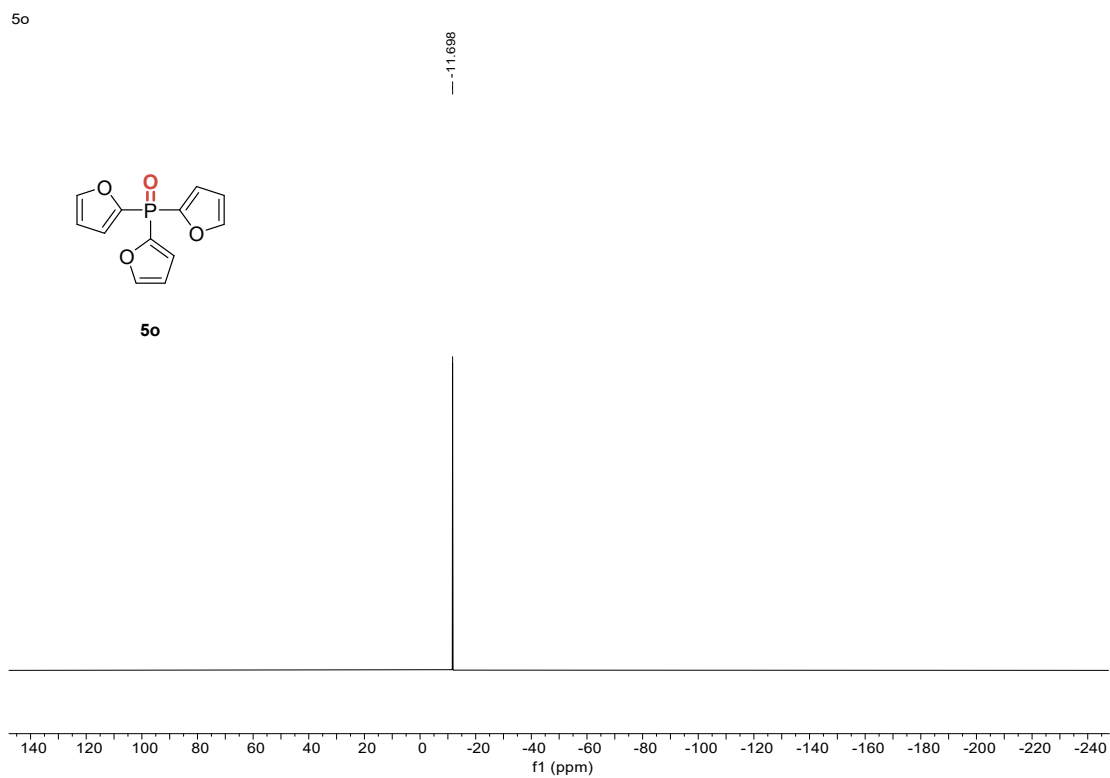

**Fig. S141**  $^{31}\text{P}$  NMR spectrum (243 MHz,  $\text{CDCl}_3$ ) of **5o**.

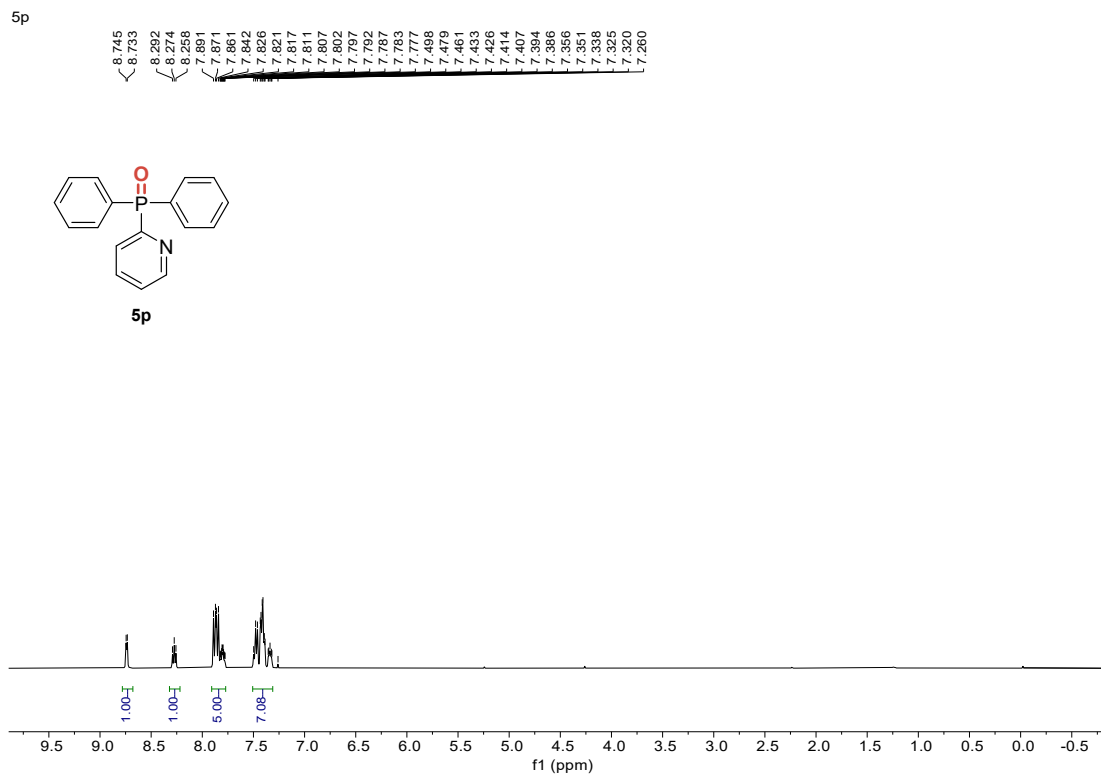

Fig. S142  $^1\text{H}$  NMR spectrum (400 MHz,  $\text{CDCl}_3$ ) of **5p**.

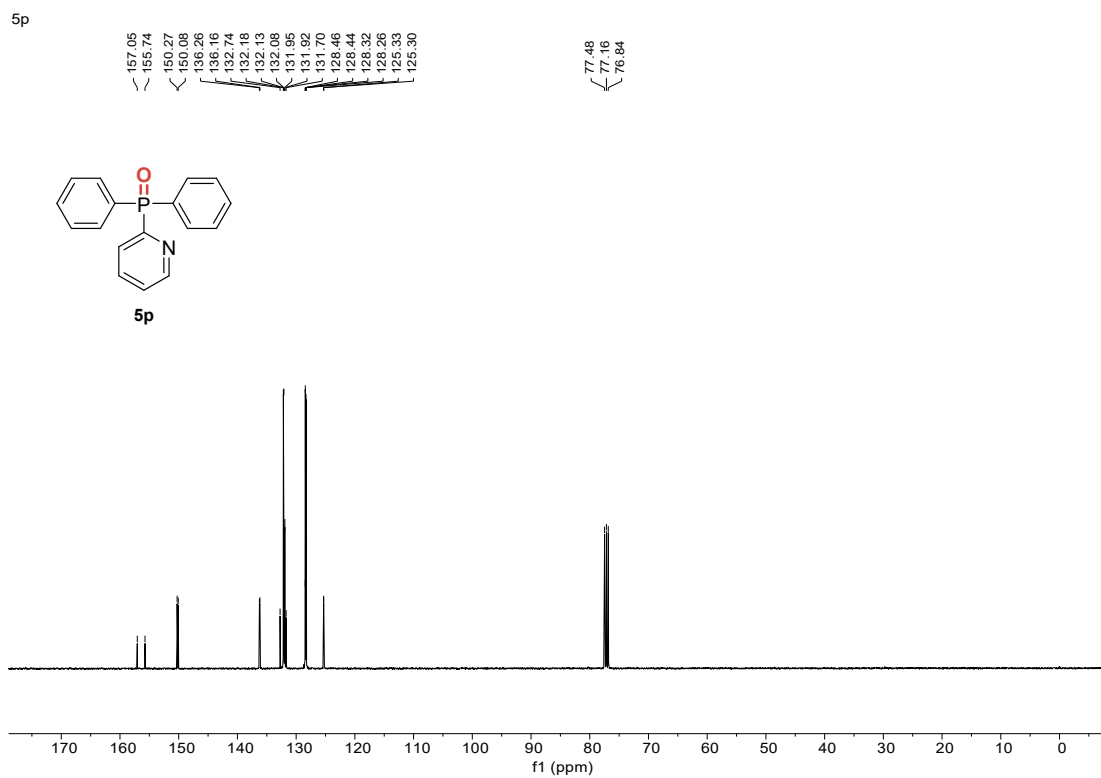

Fig. S143  $^{13}\text{C}$  NMR spectrum (101 MHz,  $\text{CDCl}_3$ ) of **5p**.



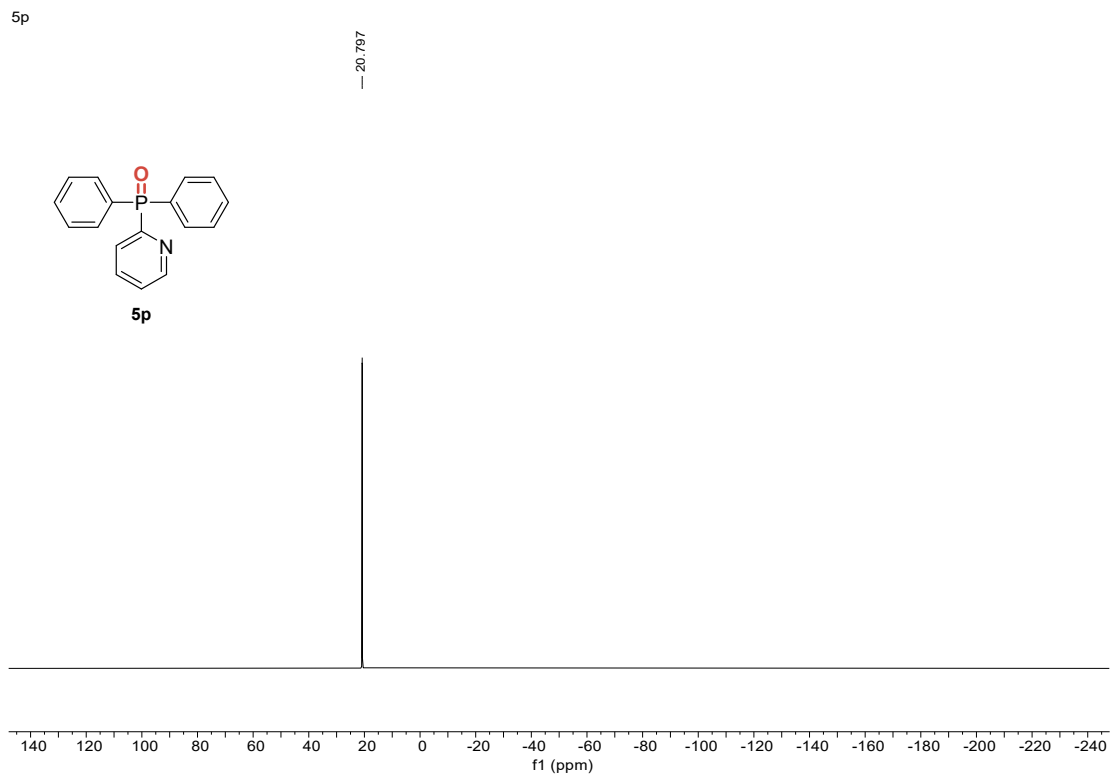

**Fig. S144**  $^{31}\text{P}$  NMR spectrum (243 MHz,  $\text{CDCl}_3$ ) of **5p**.

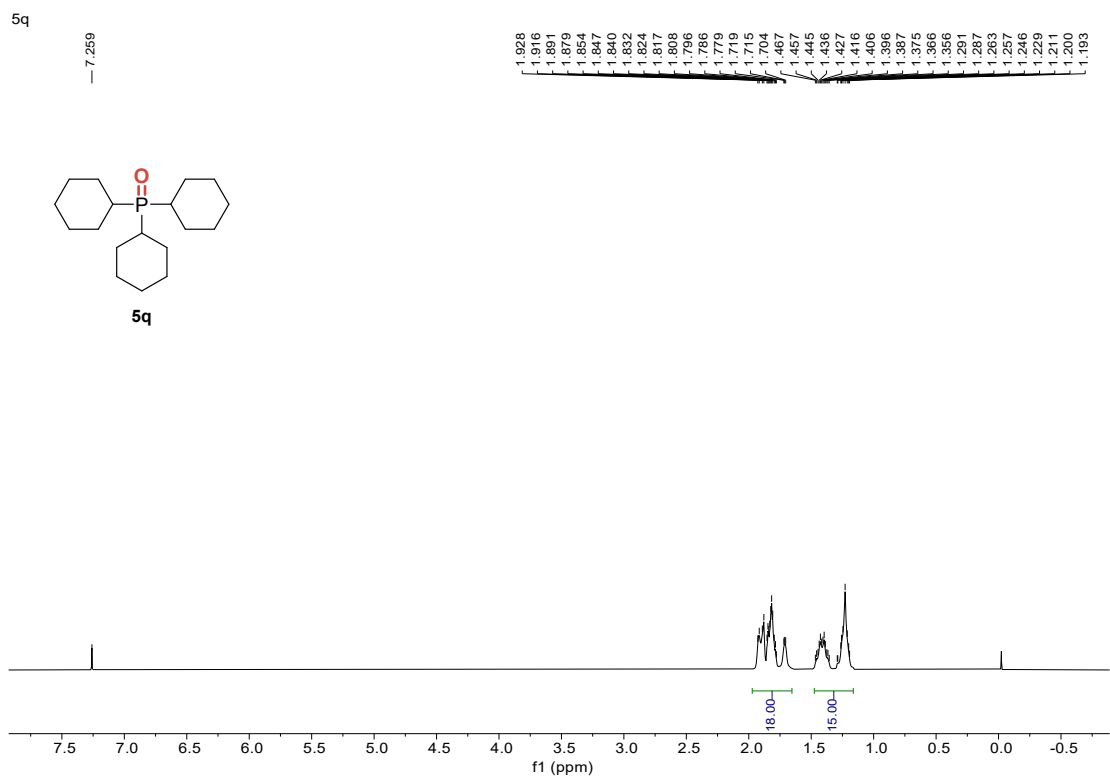

**Fig. S145**  $^1\text{H}$  NMR spectrum (400 MHz,  $\text{CDCl}_3$ ) of **5q**.

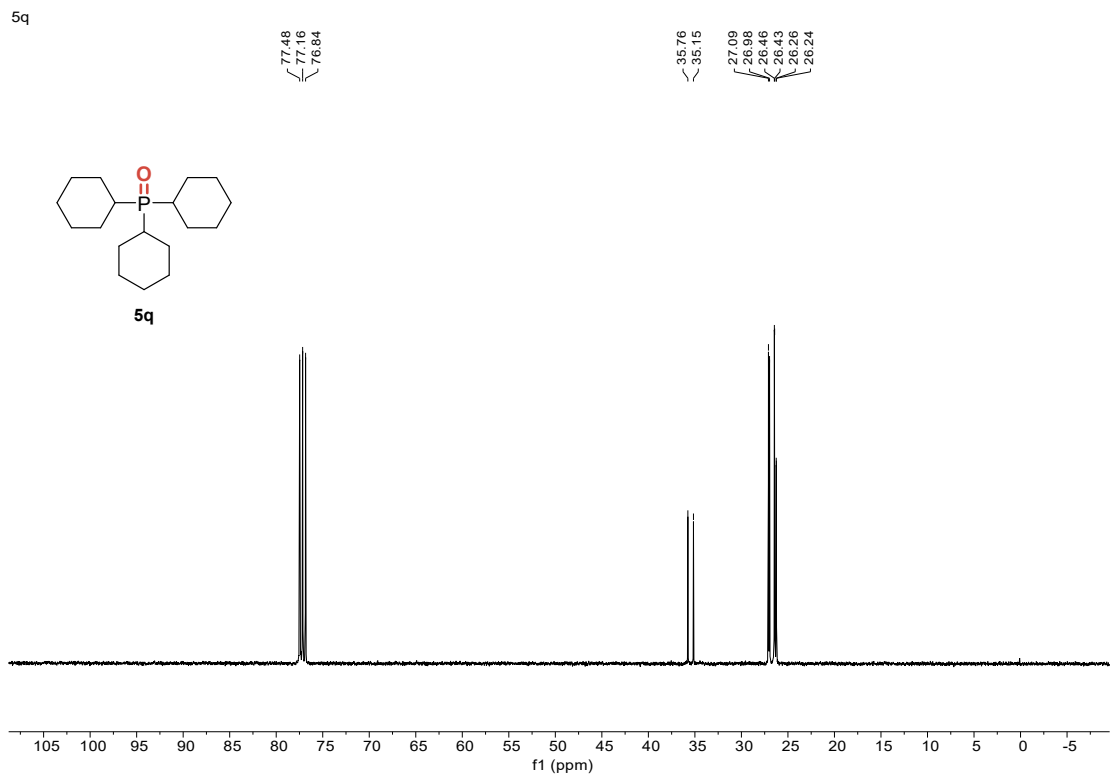

**Fig. S146**  $^{13}\text{C}$  NMR spectrum (101 MHz,  $\text{CDCl}_3$ ) of **5q**.

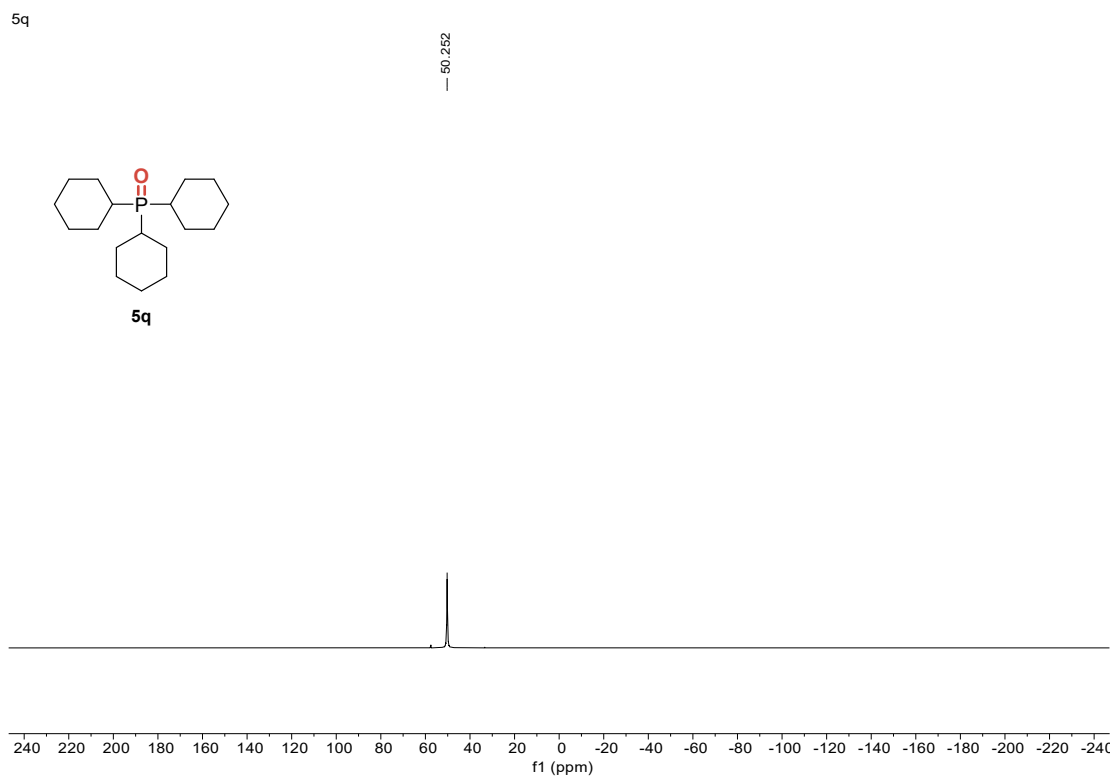

**Fig. S147**  $^{31}\text{P}$  NMR spectrum (202 MHz,  $\text{CDCl}_3$ ) of **5q**.

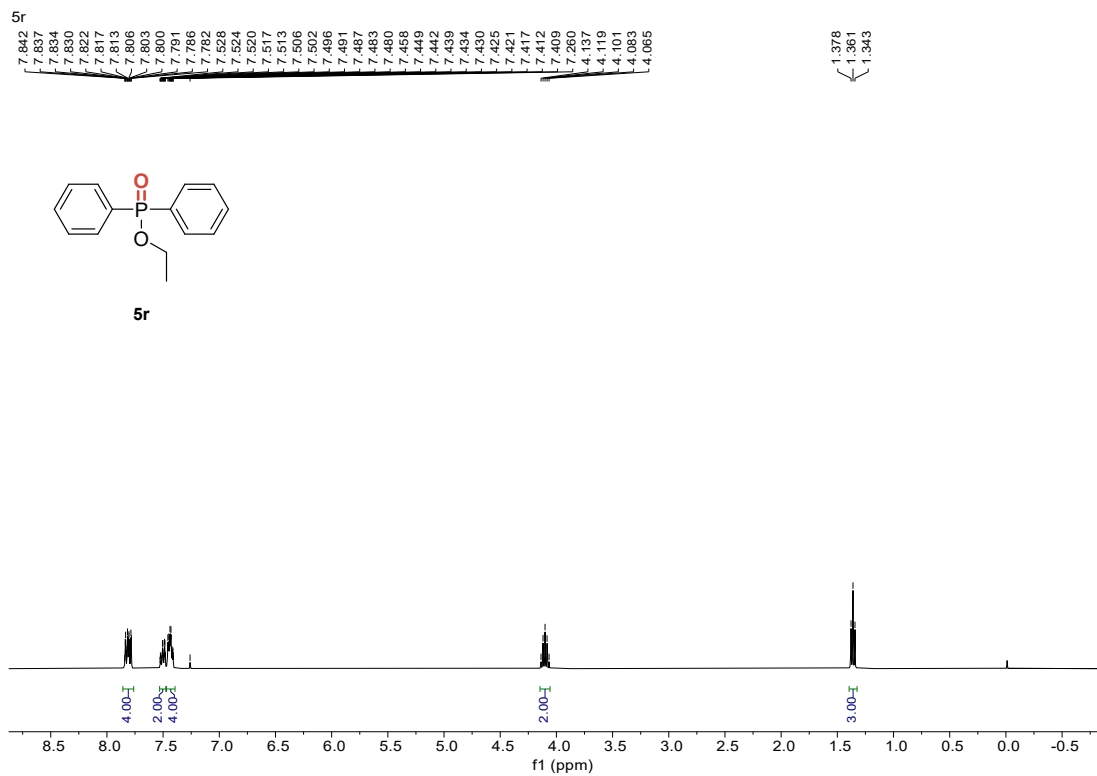

Fig. S148  $^1\text{H}$  NMR spectrum (400 MHz,  $\text{CDCl}_3$ ) of **5r**.

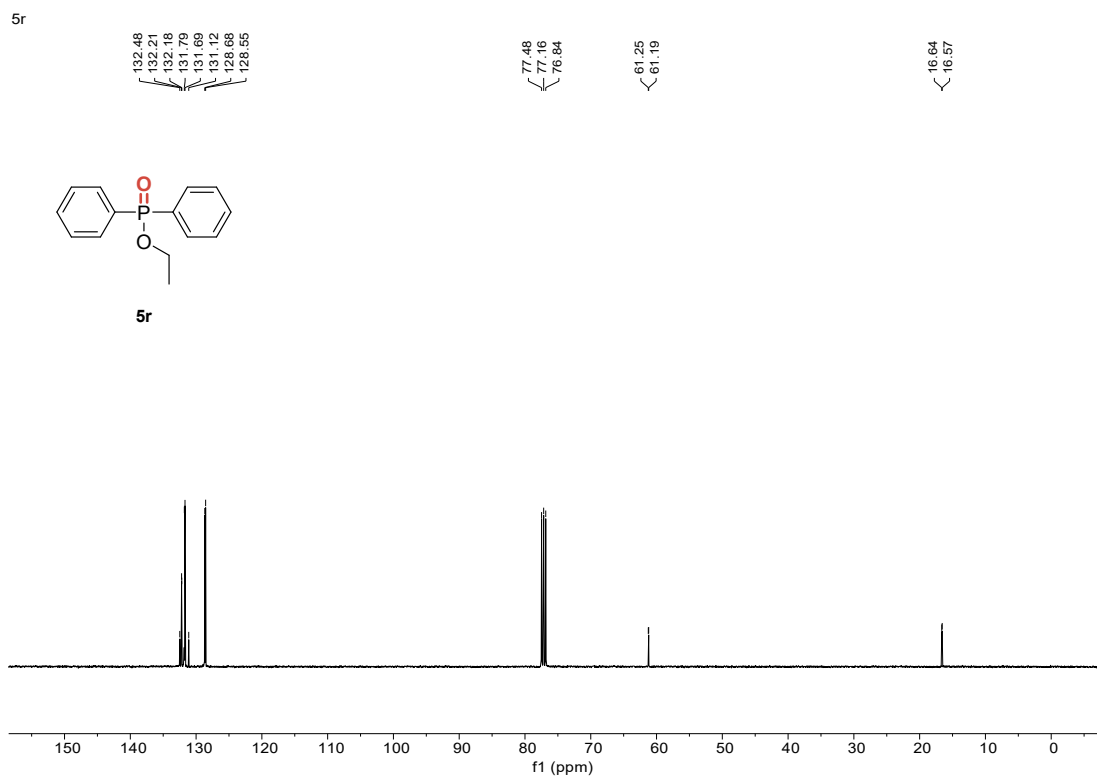

Fig. S149  $^{13}\text{C}$  NMR spectrum (101 MHz,  $\text{CDCl}_3$ ) of **5r**.

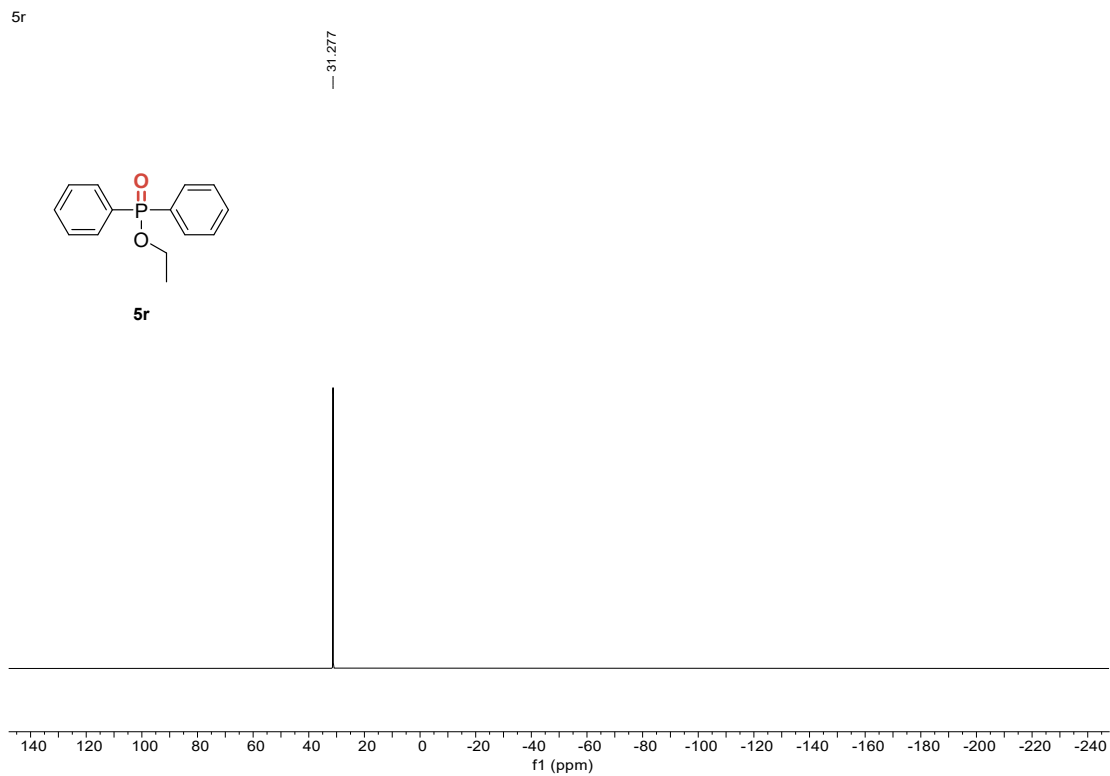

Fig. S150  $^{31}\text{P}$  NMR spectrum (243 MHz,  $\text{CDCl}_3$ ) of 5r.

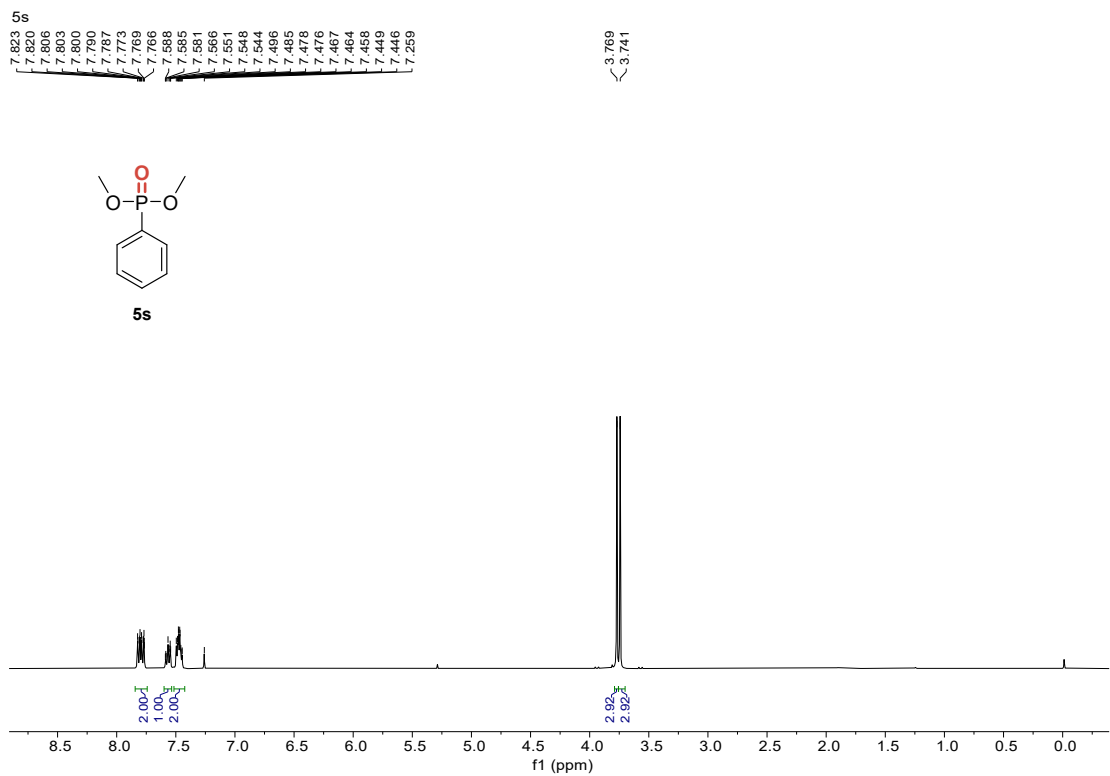

Fig. S151  $^1\text{H}$  NMR spectrum (400 MHz,  $\text{CDCl}_3$ ) of 5s.

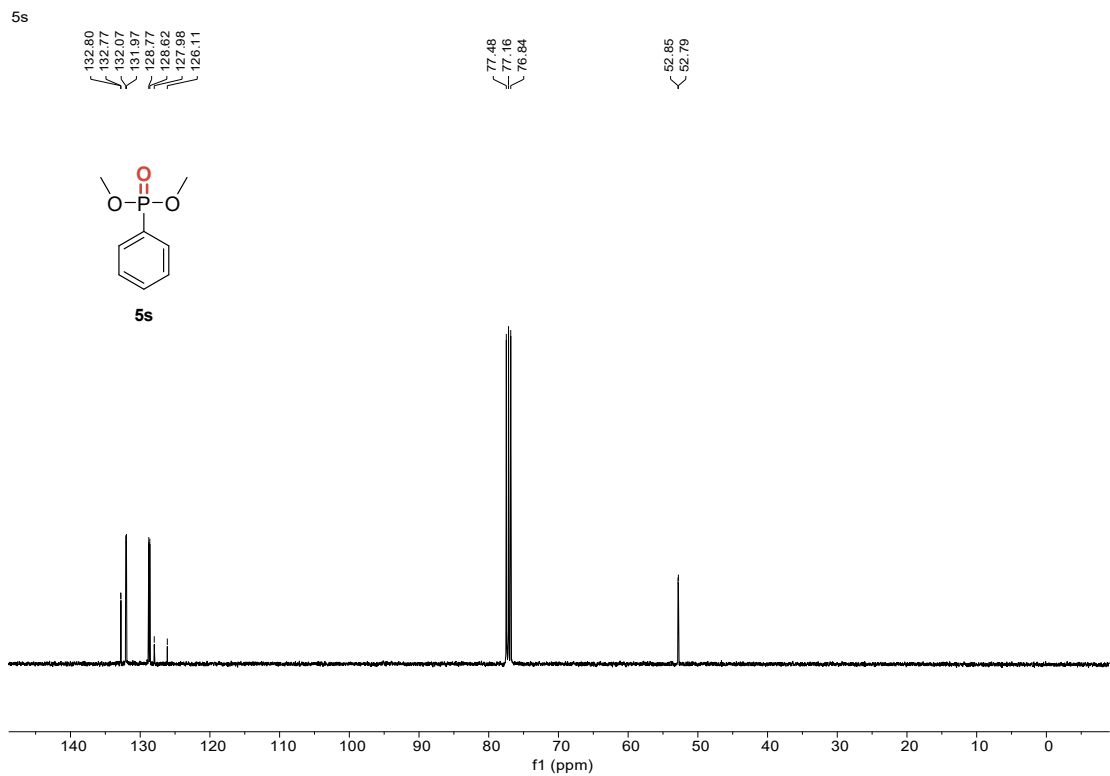

**Fig. S152**  $^{13}\text{C}$  NMR spectrum (101 MHz,  $\text{CDCl}_3$ ) of **5s**.

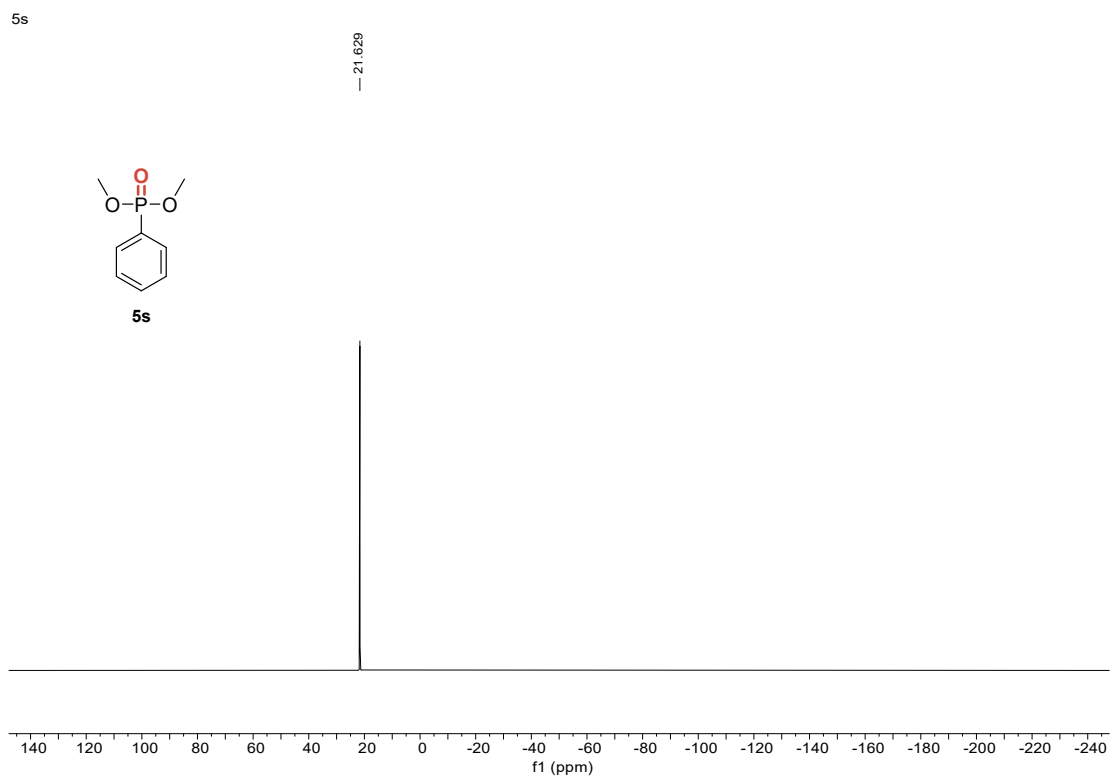

**Fig. S153**  $^{31}\text{P}$  NMR spectrum (243 MHz,  $\text{CDCl}_3$ ) of **5s**.

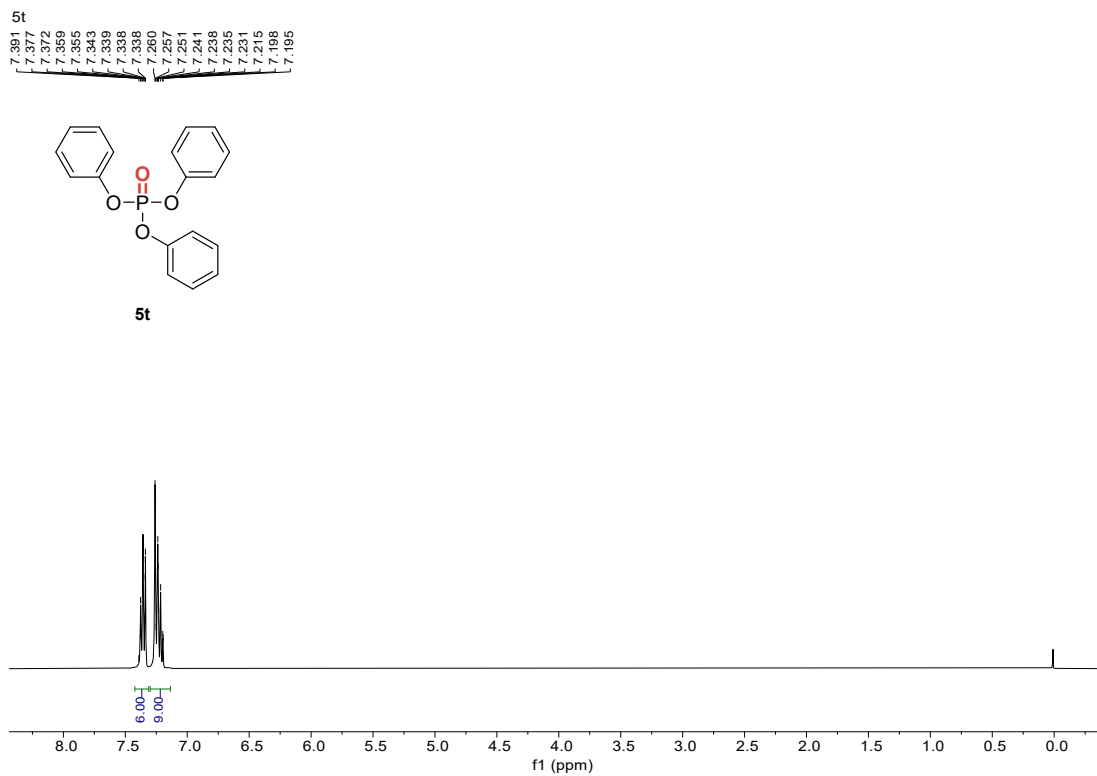

**Fig. S154**  $^1\text{H}$  NMR spectrum (400 MHz,  $\text{CDCl}_3$ ) of **5t**.

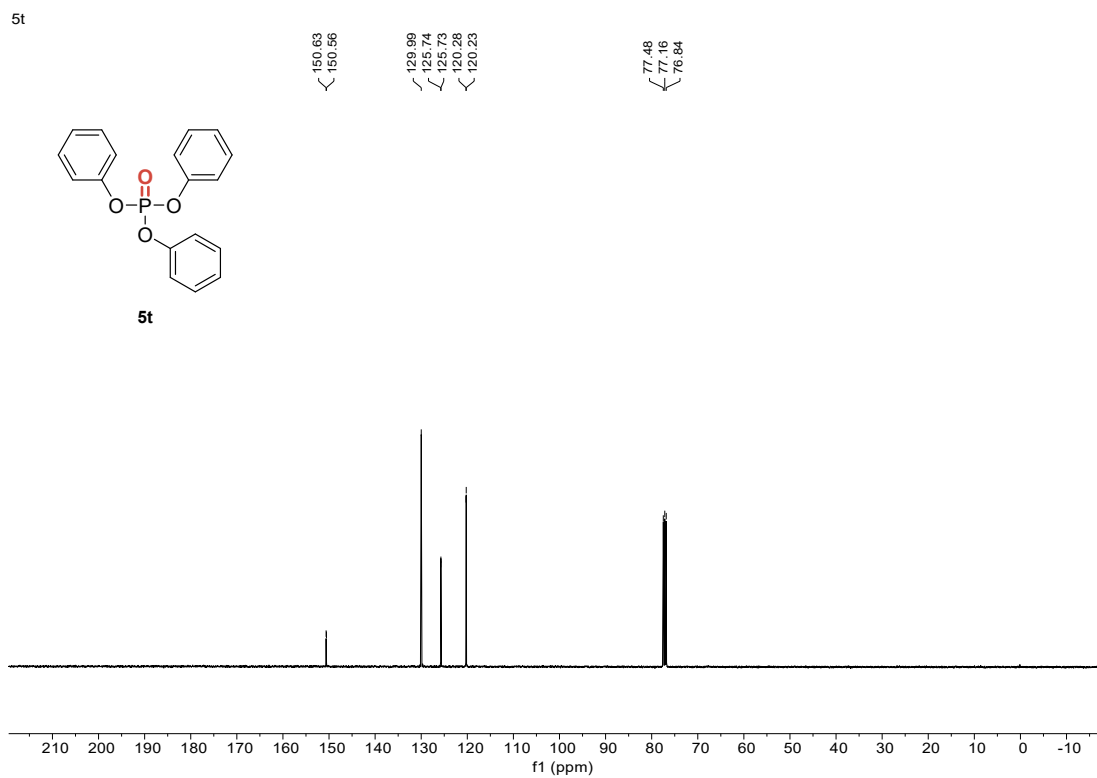

**Fig. S155**  $^{13}\text{C}$  NMR spectrum (101 MHz,  $\text{CDCl}_3$ ) of **5t**.

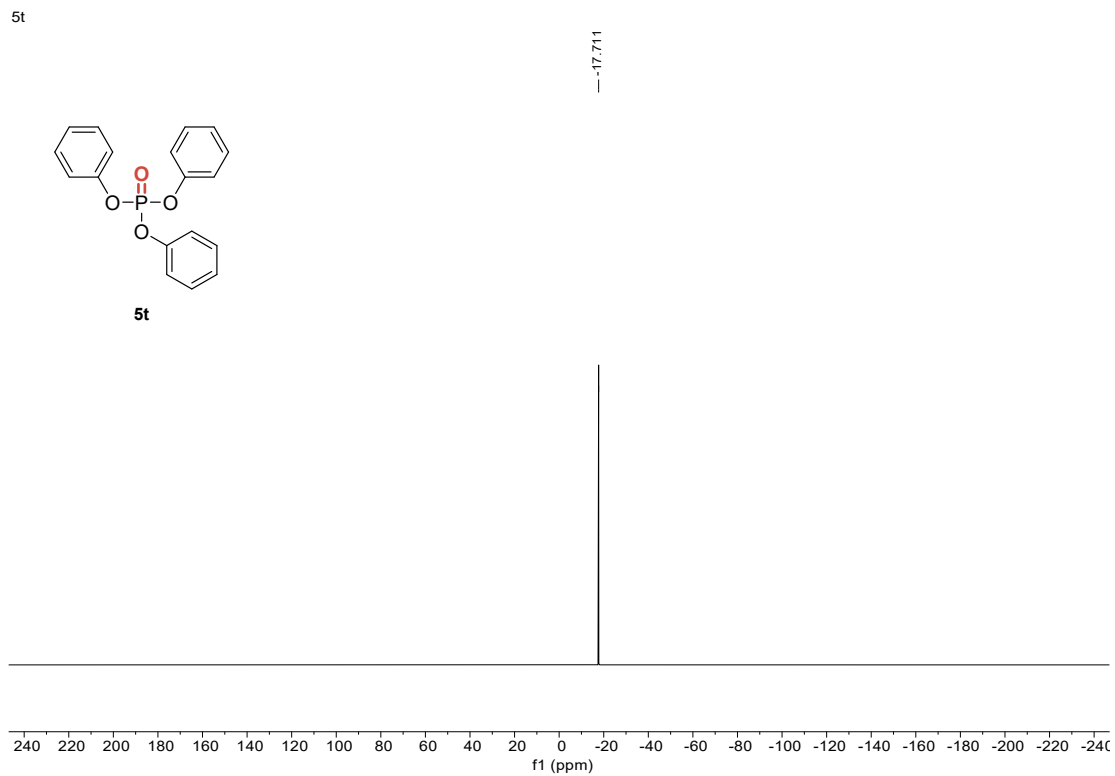

**Fig. S156**  $^{31}\text{P}$  NMR spectrum (202 MHz,  $\text{CDCl}_3$ ) of **5t**.

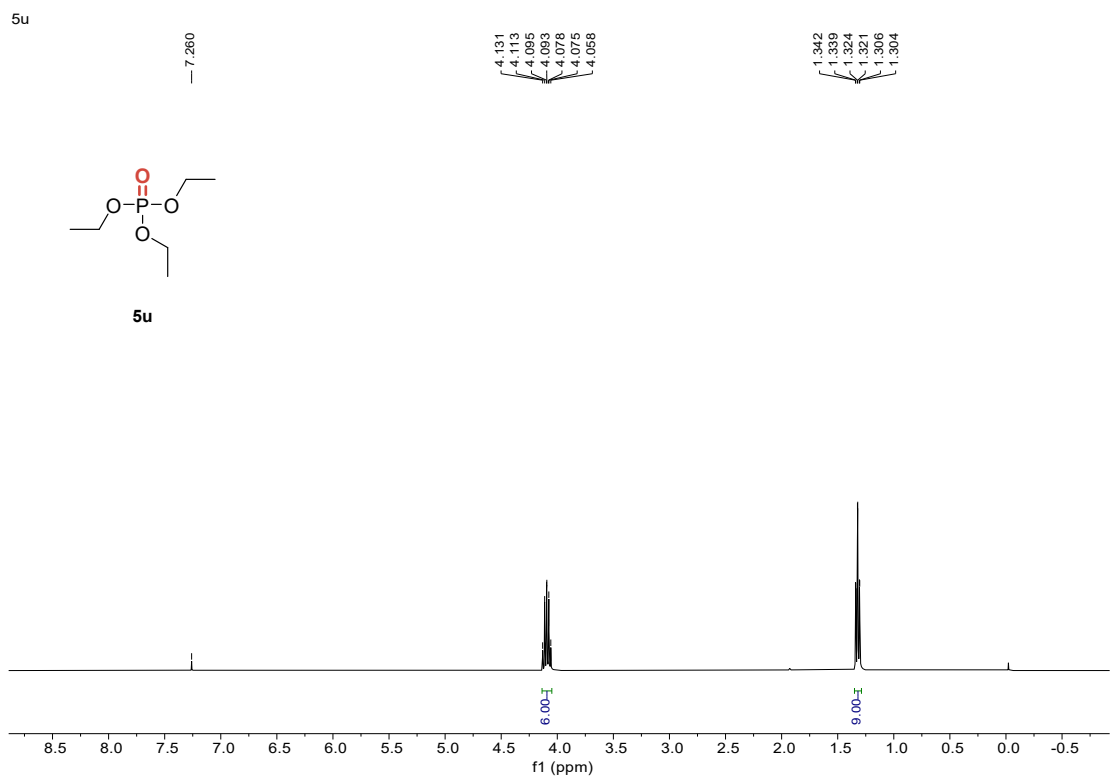

**Fig. S157**  $^1\text{H}$  NMR spectrum (400 MHz,  $\text{CDCl}_3$ ) of **5u**.

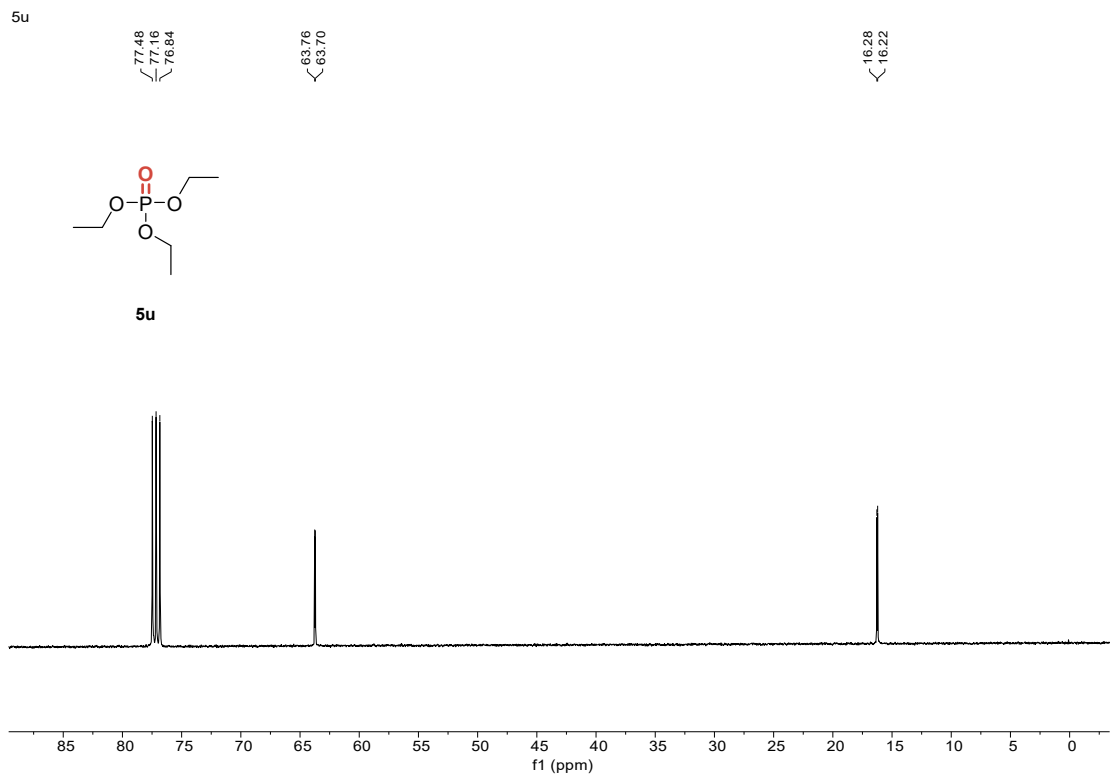

**Fig. S158**  $^{13}\text{C}$  NMR spectrum (101 MHz,  $\text{CDCl}_3$ ) of **5u**.

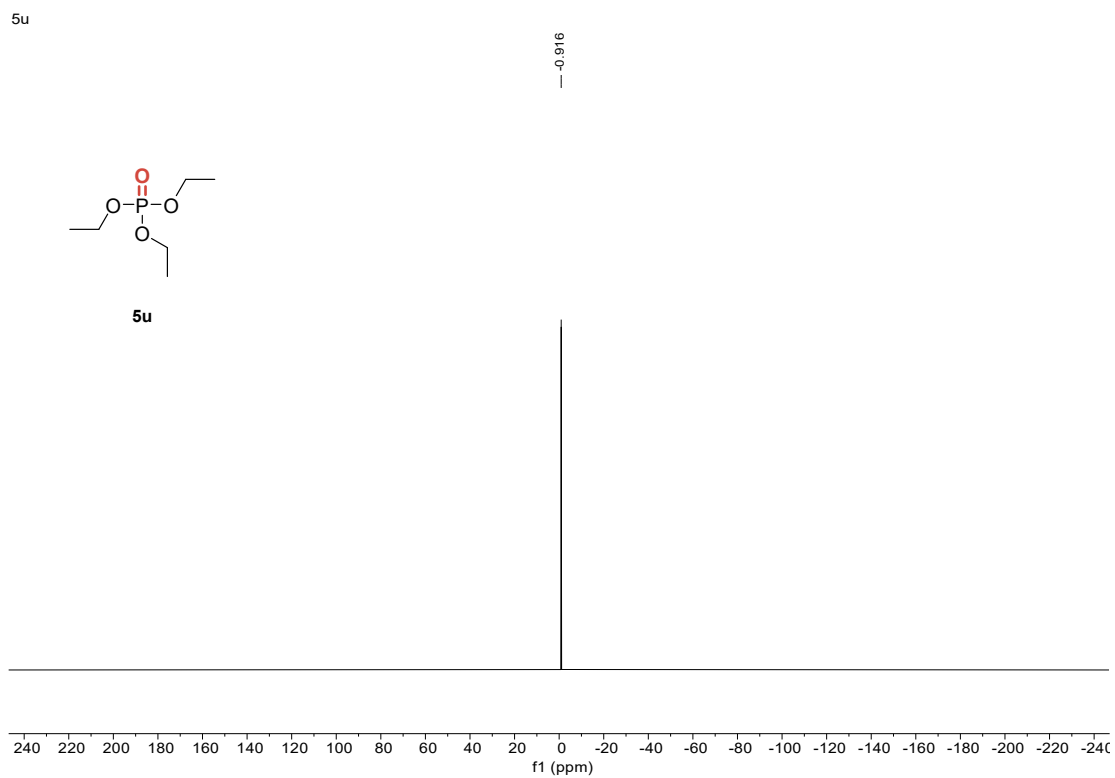

**Fig. S159**  $^{31}\text{P}$  NMR spectrum (202 MHz,  $\text{CDCl}_3$ ) of **5u**.



## 7. Cartesian coordinates of all the optimized geometries

Following geometries are optimized at the B3LYP-D3/6-311+G(d,p)/SMD(acetonitrile) level of theory:

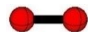

**O<sub>2</sub>**

$G = -150.390994$  a.u.,  $E = -150.374754$  a.u.

|   |             |             |              |
|---|-------------|-------------|--------------|
| O | 0.000000000 | 0.000000000 | 0.602698000  |
| O | 0.000000000 | 0.000000000 | -0.602698000 |

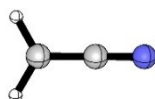

**·CH<sub>2</sub>CN**

$G = -132.139786$  a.u.,  $E = -132.146550$  a.u.

|   |              |              |              |
|---|--------------|--------------|--------------|
| C | 0.000056000  | -1.191779000 | 0.000000000  |
| H | 0.000119000  | -1.728029000 | 0.940406000  |
| H | 0.000119000  | -1.728029000 | -0.940406000 |
| C | 0.000000000  | 0.186696000  | 0.000000000  |
| N | -0.000082000 | 1.355223000  | 0.000000000  |

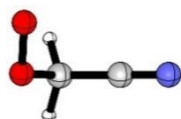

**·OOCH<sub>2</sub>CN**

$G = -282.540159$  a.u.,  $E = -282.552838$  a.u.

|   |              |              |              |
|---|--------------|--------------|--------------|
| C | -0.017191000 | 0.892170000  | 0.205190000  |
| H | -0.234439000 | 1.053102000  | 1.261904000  |
| H | 0.096983000  | 1.845448000  | -0.311720000 |
| C | 1.178179000  | 0.074754000  | 0.039559000  |
| N | 2.125745000  | -0.565482000 | -0.093547000 |
| O | -1.172255000 | 0.249755000  | -0.426431000 |
| O | -1.541330000 | -0.842470000 | 0.205950000  |

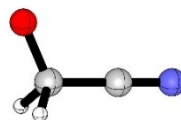

**·OCH<sub>2</sub>CN**

$G = -207.358482$  a.u.,  $E = -207.367898$  a.u.

|   |              |              |              |
|---|--------------|--------------|--------------|
| C | 0.647160000  | 0.497820000  | -0.000001000 |
| H | 0.844536000  | 1.157922000  | -0.866300000 |
| H | 0.844527000  | 1.157924000  | 0.866304000  |
| C | -0.774208000 | 0.095045000  | 0.000000000  |
| N | -1.879153000 | -0.231800000 | 0.000000000  |

|   |             |              |             |
|---|-------------|--------------|-------------|
| O | 1.528413000 | -0.531305000 | 0.000001000 |
|---|-------------|--------------|-------------|

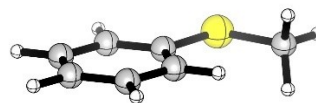

**1a**

$G = -669.794920$  a.u.,  $E = -669.890870$  a.u.

|   |              |              |              |
|---|--------------|--------------|--------------|
| C | 2.633638000  | 0.354293000  | 0.000030000  |
| C | 2.199315000  | -0.973293000 | -0.000087000 |
| C | 0.841032000  | -1.271189000 | -0.000107000 |
| C | -0.108373000 | -0.237744000 | 0.000052000  |
| C | 0.324263000  | 1.092287000  | 0.000077000  |
| C | 1.690520000  | 1.379016000  | 0.000040000  |
| H | 3.692786000  | 0.583623000  | 0.000139000  |
| H | 2.920822000  | -1.782756000 | -0.000195000 |
| H | 0.516271000  | -2.306277000 | -0.000246000 |
| H | -0.386722000 | 1.907345000  | -0.000079000 |
| H | 2.011995000  | 2.414678000  | -0.000017000 |
| S | -1.823931000 | -0.722180000 | 0.000129000  |
| C | -2.715678000 | 0.864735000  | -0.000170000 |
| H | -3.774552000 | 0.601829000  | -0.000335000 |
| H | -2.493141000 | 1.443969000  | 0.896255000  |
| H | -2.492867000 | 1.443844000  | -0.896597000 |

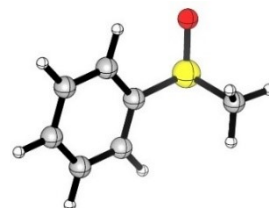

**2a**

$G = -745.001307$  a.u.,  $E = -745.099241$  a.u.

|   |              |              |              |
|---|--------------|--------------|--------------|
| C | -2.865898000 | 0.090128000  | 0.163630000  |
| C | -2.081497000 | 1.225940000  | 0.360235000  |
| C | -0.699715000 | 1.163944000  | 0.177099000  |
| C | -0.125678000 | -0.044410000 | -0.196815000 |
| C | -0.895129000 | -1.186446000 | -0.411272000 |
| C | -2.273516000 | -1.113886000 | -0.222794000 |
| H | -3.939247000 | 0.142678000  | 0.304744000  |
| H | -2.542656000 | 2.161868000  | 0.654155000  |
| H | -0.070485000 | 2.034711000  | 0.317649000  |
| H | -0.433505000 | -2.118318000 | -0.719981000 |
| H | -2.884038000 | -1.995024000 | -0.382467000 |
| C | 2.092099000  | -1.015063000 | 1.065662000  |
| H | 3.177244000  | -1.124960000 | 1.081663000  |

|   |             |              |              |
|---|-------------|--------------|--------------|
| H | 1.744698000 | -0.433090000 | 1.920117000  |
| H | 1.615453000 | -1.996048000 | 1.036004000  |
| S | 1.673766000 | -0.115779000 | -0.466265000 |
| O | 2.206037000 | 1.307426000  | -0.295764000 |

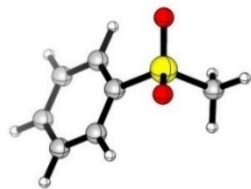

### 3a

$G = -820.236353$  a.u.,  $E = -820.338588$  a.u.

|   |              |              |              |
|---|--------------|--------------|--------------|
| C | 3.082725000  | -0.000082000 | 0.076452000  |
| C | 2.390753000  | -1.210755000 | 0.034122000  |
| C | 1.000566000  | -1.218196000 | -0.050322000 |
| C | 0.326418000  | 0.000068000  | -0.092353000 |
| C | 1.000675000  | 1.218252000  | -0.050036000 |
| C | 2.390870000  | 1.210658000  | 0.034385000  |
| H | 4.164568000  | -0.000142000 | 0.141430000  |
| H | 2.931423000  | -2.149180000 | 0.062956000  |
| H | 0.451478000  | -2.150243000 | -0.089863000 |
| H | 0.451654000  | 2.150344000  | -0.089342000 |
| H | 2.931626000  | 2.149028000  | 0.063420000  |
| C | -1.968779000 | -0.001103000 | 1.564734000  |
| H | -3.059899000 | -0.001407000 | 1.573004000  |
| H | -1.575120000 | -0.900965000 | 2.036463000  |
| H | -1.575606000 | 0.898369000  | 2.037617000  |
| O | -1.910325000 | 1.269783000  | -0.767830000 |
| S | -1.468378000 | 0.000132000  | -0.158626000 |
| O | -1.910356000 | -1.268654000 | -0.769615000 |

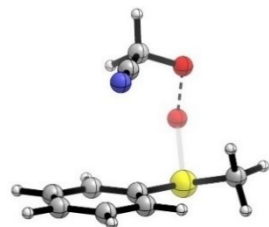

### TS<sub>1a/2a</sub>

$G = -952.297876$  a.u.,  $E = -952.425027$  a.u.

|   |              |              |              |
|---|--------------|--------------|--------------|
| C | -3.153929000 | 0.674477000  | -0.116770000 |
| C | -2.718811000 | -0.057561000 | 0.986692000  |
| C | -1.544554000 | -0.803315000 | 0.922664000  |
| C | -0.810369000 | -0.811976000 | -0.265363000 |
| C | -1.242579000 | -0.087679000 | -1.382003000 |
| C | -2.414266000 | 0.656657000  | -1.299853000 |
| H | -4.065212000 | 1.257639000  | -0.055929000 |

|   |              |              |              |
|---|--------------|--------------|--------------|
| H | -3.290119000 | -0.046547000 | 1.907471000  |
| H | -1.216571000 | -1.360141000 | 1.789538000  |
| H | -0.664187000 | -0.096398000 | -2.298214000 |
| H | -2.746261000 | 1.225540000  | -2.160353000 |
| C | 1.189602000  | -2.155351000 | 1.219408000  |
| H | 2.180850000  | -2.598178000 | 1.127017000  |
| H | 1.234181000  | -1.249405000 | 1.821522000  |
| H | 0.498841000  | -2.882893000 | 1.644070000  |
| S | 0.689070000  | -1.745556000 | -0.468483000 |
| C | 2.055296000  | 1.975139000  | -0.286363000 |
| H | 1.690809000  | 1.991405000  | -1.318833000 |
| H | 2.720384000  | 2.837904000  | -0.150709000 |
| C | 0.904952000  | 2.161953000  | 0.618419000  |
| N | 0.021877000  | 2.315064000  | 1.344214000  |
| O | 2.790910000  | 0.821928000  | -0.002543000 |
| O | 2.069960000  | -0.405621000 | -0.822497000 |

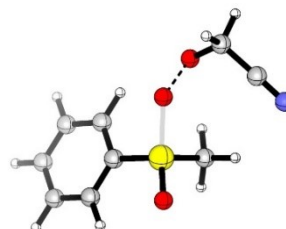

### TS<sub>2a/3a</sub>

$G = -1027.499079$  a.u.,  $E = -1027.629723$  a.u.

|   |              |              |              |
|---|--------------|--------------|--------------|
| C | -4.021515000 | -0.932853000 | 0.163217000  |
| C | -3.878220000 | 0.428936000  | -0.099964000 |
| C | -2.608666000 | 0.988881000  | -0.223823000 |
| C | -1.499868000 | 0.159238000  | -0.078301000 |
| C | -1.619290000 | -1.206538000 | 0.173613000  |
| C | -2.895845000 | -1.746551000 | 0.300993000  |
| H | -5.011893000 | -1.362332000 | 0.258509000  |
| H | -4.752538000 | 1.059642000  | -0.208030000 |
| H | -2.480274000 | 2.044177000  | -0.427059000 |
| H | -0.740930000 | -1.831116000 | 0.260979000  |
| H | -3.009291000 | -2.805362000 | 0.500872000  |
| C | 0.736390000  | 0.922027000  | 1.469226000  |
| H | 1.720966000  | 1.387170000  | 1.457501000  |
| H | 0.027867000  | 1.512781000  | 2.049611000  |
| H | 0.790361000  | -0.104430000 | 1.825504000  |
| S | 0.131180000  | 0.907270000  | -0.228631000 |
| O | -0.042933000 | 2.341234000  | -0.660152000 |
| C | 3.351457000  | -1.410857000 | -0.430054000 |
| H | 3.455181000  | -1.416917000 | -1.519736000 |
| H | 3.948040000  | -2.236776000 | -0.024192000 |
| C | 3.899659000  | -0.146378000 | 0.086717000  |

|   |             |              |              |
|---|-------------|--------------|--------------|
| N | 4.311382000 | 0.849893000  | 0.495450000  |
| O | 2.027911000 | -1.632226000 | -0.019537000 |
| O | 1.138689000 | -0.589988000 | -0.839530000 |

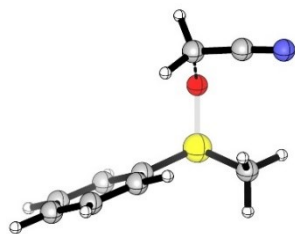

**TS\*<sub>1a/2a</sub>**

$G = -877.097207$  a.u.,  $E = -877.220426$  a.u.

|   |              |              |              |
|---|--------------|--------------|--------------|
| C | 3.409822000  | 1.097486000  | -0.012301000 |
| C | 3.353289000  | -0.133611000 | 0.643816000  |
| C | 2.189338000  | -0.893587000 | 0.606296000  |
| C | 1.074196000  | -0.412127000 | -0.091375000 |
| C | 1.119116000  | 0.824700000  | -0.743916000 |
| C | 2.294070000  | 1.570256000  | -0.703928000 |
| H | 4.319801000  | 1.685207000  | 0.014522000  |
| H | 4.217676000  | -0.506139000 | 1.180807000  |
| H | 2.147158000  | -1.853557000 | 1.108046000  |
| H | 0.258890000  | 1.208654000  | -1.274912000 |
| H | 2.333997000  | 2.526465000  | -1.212502000 |
| C | -1.218937000 | -1.052528000 | -1.608628000 |
| H | -2.127495000 | -1.654566000 | -1.610784000 |
| H | -1.473261000 | 0.002736000  | -1.672166000 |
| H | -0.568266000 | -1.349859000 | -2.431174000 |
| S | -0.378913000 | -1.434327000 | -0.048709000 |
| C | -2.123648000 | 0.974976000  | 1.193044000  |
| H | -1.285162000 | 1.604679000  | 0.916119000  |
| H | -2.356141000 | 0.974839000  | 2.251848000  |
| C | -3.241205000 | 1.066163000  | 0.338590000  |
| N | -4.136751000 | 1.066544000  | -0.406512000 |

|   |              |              |             |
|---|--------------|--------------|-------------|
| O | -1.447946000 | -0.675675000 | 1.078193000 |
|---|--------------|--------------|-------------|

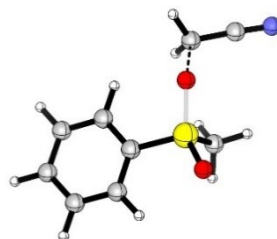

**TS\*<sub>2a/3a</sub>**

$G = -952.307007$  a.u.,  $E = -952.434603$  a.u.

|   |              |              |              |
|---|--------------|--------------|--------------|
| C | 3.650840000  | 1.104033000  | 0.183175000  |
| C | 3.569625000  | -0.288714000 | 0.182214000  |
| C | 2.335813000  | -0.918832000 | 0.043189000  |
| C | 1.192897000  | -0.131010000 | -0.089201000 |
| C | 1.255015000  | 1.260987000  | -0.099640000 |
| C | 2.496525000  | 1.875100000  | 0.042436000  |
| H | 4.614221000  | 1.588862000  | 0.288963000  |
| H | 4.466411000  | -0.887628000 | 0.288150000  |
| H | 2.259757000  | -1.998693000 | 0.035344000  |
| H | 0.359996000  | 1.854000000  | -0.225497000 |
| H | 2.560477000  | 2.956732000  | 0.036107000  |
| C | -1.012552000 | -1.058687000 | 1.411987000  |
| H | -2.010047000 | -1.496174000 | 1.367344000  |
| H | -0.331448000 | -1.697695000 | 1.973329000  |
| H | -1.043626000 | -0.054694000 | 1.832552000  |
| S | -0.387455000 | -0.967346000 | -0.274810000 |
| O | -0.119759000 | -2.397584000 | -0.676992000 |
| C | -2.385809000 | 1.483422000  | -0.226939000 |
| H | -2.402645000 | 2.172235000  | -1.064753000 |
| H | -1.835659000 | 1.852104000  | 0.633017000  |
| C | -3.655183000 | 0.936285000  | 0.097412000  |
| N | -4.670898000 | 0.439075000  | 0.355982000  |
| O | -1.433353000 | 0.215015000  | -0.888917000 |

Following geometries are optimized at the B3LYP-D3/6-311+G(d,p)/SMD(methanol) level of theory:

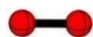

**O<sub>2</sub>**

$G = -150.387376$  a.u.,  $E = -150.371153$  a.u.

|   |             |             |              |
|---|-------------|-------------|--------------|
| O | 0.000000000 | 0.000000000 | 0.601989000  |
| O | 0.000000000 | 0.000000000 | -0.601989000 |

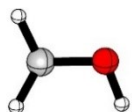

**·CH<sub>2</sub>OH**

$G = -115.097617$  a.u.,  $E = -115.111425$  a.u.

|   |              |              |              |
|---|--------------|--------------|--------------|
| C | -0.688517000 | 0.027467000  | 0.056087000  |
| H | -1.107513000 | 1.007716000  | -0.137902000 |
| H | -1.244514000 | -0.886338000 | -0.104227000 |
| O | 0.672164000  | -0.127674000 | -0.015463000 |
| H | 1.105822000  | 0.735211000  | 0.029309000  |

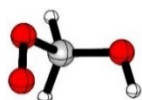

**·OOCH<sub>2</sub>OH**

$G = -265.526068$  a.u.,  $E = -265.546332$  a.u.

|   |              |              |              |
|---|--------------|--------------|--------------|
| C | -0.604031000 | 0.544331000  | 0.277500000  |
| H | -0.445070000 | 0.503074000  | 1.355311000  |
| H | -0.978706000 | 1.506791000  | -0.064009000 |
| O | -1.411946000 | -0.462936000 | -0.205203000 |
| H | -1.247954000 | -1.278433000 | 0.288416000  |
| O | 0.745995000  | 0.482025000  | -0.339052000 |
| O | 1.452941000  | -0.518766000 | 0.138665000  |

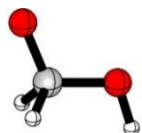

**·OCH<sub>2</sub>OH**

$G = -190.346666$  a.u.,  $E = -190.361908$  a.u.

|   |              |              |              |
|---|--------------|--------------|--------------|
| C | -0.106693000 | 0.426313000  | 0.000063000  |
| H | -0.137295000 | 1.119699000  | -0.876920000 |
| H | -0.137562000 | 1.119368000  | 0.877329000  |
| O | 1.085902000  | -0.329535000 | 0.000122000  |
| H | 1.838771000  | 0.278803000  | -0.000938000 |
| O | -1.201371000 | -0.304934000 | -0.000104000 |

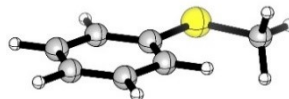

**1a**

$G = -669.793317$  a.u.,  $E = -669.889276$  a.u.

|   |              |              |              |
|---|--------------|--------------|--------------|
| C | -2.633638000 | 0.354293000  | -0.000030000 |
| C | -2.199315000 | -0.973293000 | 0.000087000  |
| C | -0.841032000 | -1.271189000 | 0.000107000  |
| C | 0.108373000  | -0.237744000 | -0.000052000 |
| C | -0.324263000 | 1.092287000  | -0.000077000 |
| C | -1.690520000 | 1.379016000  | -0.000040000 |
| H | -3.692786000 | 0.583623000  | -0.000139000 |
| H | -2.920822000 | -1.782756000 | 0.000195000  |
| H | -0.516271000 | -2.306277000 | 0.000246000  |
| H | 0.386722000  | 1.907345000  | 0.000079000  |
| H | -2.011995000 | 2.414678000  | 0.000017000  |
| S | 1.823931000  | -0.722180000 | -0.000129000 |
| C | 2.715678000  | 0.864735000  | 0.000170000  |
| H | 3.774552000  | 0.601829000  | 0.000335000  |
| H | 2.493141000  | 1.443969000  | -0.896255000 |
| H | 2.492867000  | 1.443844000  | 0.896597000  |

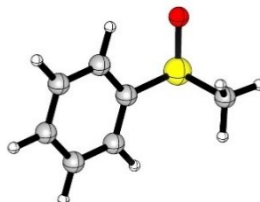

**2a**

$G = -745.003455$  a.u.,  $E = -745.101631$  a.u.

|   |              |              |              |
|---|--------------|--------------|--------------|
| C | -2.864718000 | 0.090702000  | 0.165530000  |
| C | -2.080240000 | 1.226501000  | 0.359750000  |
| C | -0.698884000 | 1.165027000  | 0.176140000  |
| C | -0.126675000 | -0.044090000 | -0.198463000 |
| C | -0.895671000 | -1.186507000 | -0.411653000 |
| C | -2.273434000 | -1.113525000 | -0.220285000 |
| H | -3.937923000 | 0.143901000  | 0.308097000  |
| H | -2.540405000 | 2.163227000  | 0.652700000  |
| H | -0.075548000 | 2.039403000  | 0.317740000  |
| H | -0.435387000 | -2.118579000 | -0.721758000 |
| H | -2.884072000 | -1.994906000 | -0.378276000 |
| C | 2.099193000  | -0.983271000 | 1.085637000  |
| H | 3.185045000  | -1.086540000 | 1.099812000  |
| H | 1.750150000  | -0.379299000 | 1.923918000  |
| H | 1.628272000  | -1.967465000 | 1.084533000  |
| S | 1.668423000  | -0.133447000 | -0.466033000 |
| O | 2.207210000  | 1.300798000  | -0.321270000 |

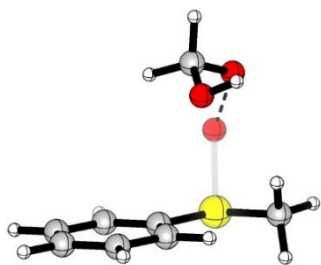

**TS<sub>1a/2a</sub>**

$G = -935.281518$  a.u.,  $E = -935.416949$  a.u.

|   |              |              |              |
|---|--------------|--------------|--------------|
| C | -3.209779000 | 0.874150000  | 0.020108000  |
| C | -2.490157000 | 0.611867000  | 1.184821000  |
| C | -1.329536000 | -0.156128000 | 1.141982000  |
| C | -0.900885000 | -0.671356000 | -0.084115000 |
| C | -1.618457000 | -0.414454000 | -1.259721000 |
| C | -2.770433000 | 0.360734000  | -1.201080000 |
| H | -4.109730000 | 1.476473000  | 0.062560000  |

|   |              |              |              |
|---|--------------|--------------|--------------|
| H | -2.827486000 | 1.009530000  | 2.134883000  |
| H | -0.778983000 | -0.344170000 | 2.053065000  |
| H | -1.277995000 | -0.812477000 | -2.208915000 |
| H | -3.324502000 | 0.563127000  | -2.110187000 |
| C | 1.278874000  | -1.748537000 | 1.378263000  |
| H | 2.211857000  | -2.298644000 | 1.257335000  |
| H | 1.479238000  | -0.743506000 | 1.744787000  |
| H | 0.610426000  | -2.293884000 | 2.044202000  |
| S | 0.553255000  | -1.667186000 | -0.273863000 |
| O | 1.883193000  | -0.440654000 | -1.048783000 |
| C | 1.973642000  | 1.924908000  | -0.361994000 |
| H | 2.635636000  | 2.798154000  | -0.446832000 |
| H | 1.203934000  | 1.955051000  | -1.136160000 |
| O | 1.286391000  | 1.945225000  | 0.879046000  |
| H | 1.932742000  | 2.084702000  | 1.584096000  |
| O | 2.804562000  | 0.819616000  | -0.518588000 |

Following geometries are optimized at the B3LYP-D3/6-311+G(d,p)/SMD(cyclohexane) level of theory:

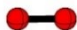

**O<sub>2</sub>**

$G = -150.388369$  a.u.,  $E = -150.372124$  a.u.

|   |             |             |              |
|---|-------------|-------------|--------------|
| O | 0.000000000 | 0.000000000 | 0.602845000  |
| O | 0.000000000 | 0.000000000 | -0.602845000 |

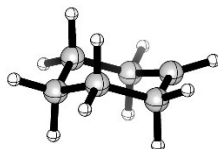

**·Cy**

$G = -235.184710$  a.u.,  $E = -235.309598$  a.u.

|   |              |              |              |
|---|--------------|--------------|--------------|
| C | -0.000032000 | 1.410193000  | 0.263832000  |
| C | 1.265997000  | 0.709733000  | -0.243175000 |
| C | 1.284803000  | -0.776872000 | 0.163570000  |
| C | 0.000060000  | -1.461778000 | -0.165954000 |
| C | -1.284745000 | -0.776972000 | 0.163505000  |
| C | -1.266060000 | 0.709674000  | -0.243108000 |
| H | 2.131973000  | -1.292133000 | -0.298153000 |
| H | 1.301866000  | 0.781867000  | -1.336498000 |
| H | 2.160136000  | 1.211752000  | 0.139365000  |
| H | -0.000007000 | 1.409516000  | 1.361801000  |
| H | -0.000060000 | 2.458980000  | -0.049023000 |
| H | 0.000102000  | -2.504125000 | -0.463685000 |
| H | -2.131843000 | -1.292263000 | -0.298322000 |
| H | -1.458955000 | -0.825589000 | 1.254609000  |
| H | -1.302072000 | 0.781933000  | -1.336416000 |
| H | -2.160190000 | 1.211574000  | 0.139609000  |
| H | 1.458908000  | -0.825377000 | 1.254692000  |

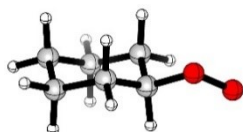

**·OOCy**

$G = -385.608341$  a.u.,  $E = -385.741152$  a.u.

|   |              |              |              |
|---|--------------|--------------|--------------|
| C | 2.233368000  | 0.209974000  | -0.207334000 |
| C | 1.327208000  | 1.376914000  | 0.202615000  |
| C | -0.114944000 | 1.160021000  | -0.276914000 |
| C | -0.640881000 | -0.174410000 | 0.234846000  |
| C | 0.229206000  | -1.347414000 | -0.187497000 |
| C | 1.673855000  | -1.128959000 | 0.287485000  |
| H | -0.768981000 | 1.965531000  | 0.064812000  |

|   |              |              |              |
|---|--------------|--------------|--------------|
| H | 1.335625000  | 1.477945000  | 1.294784000  |
| H | 1.707945000  | 2.318885000  | -0.201553000 |
| H | 2.317087000  | 0.184768000  | -1.300821000 |
| H | 3.243908000  | 0.361856000  | 0.183146000  |
| H | -0.774413000 | -0.149445000 | 1.319573000  |
| H | -0.176776000 | -2.277853000 | 0.217843000  |
| H | 0.207241000  | -1.427406000 | -1.280077000 |
| H | 1.701064000  | -1.150398000 | 1.383837000  |
| H | 2.298938000  | -1.957118000 | -0.057247000 |
| H | -0.144290000 | 1.149598000  | -1.372518000 |
| O | -1.982417000 | -0.429858000 | -0.324785000 |
| O | -2.916861000 | 0.295717000  | 0.253412000  |

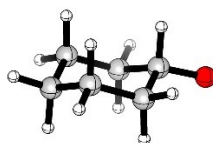

**·OCy**

$G = -310.422326$  a.u.,  $E = -310.550899$  a.u.

|   |              |              |              |
|---|--------------|--------------|--------------|
| C | 1.816794000  | -0.000257000 | -0.260783000 |
| C | 1.101191000  | 1.265068000  | 0.224963000  |
| C | -0.372289000 | 1.280436000  | -0.201291000 |
| C | -1.102846000 | 0.000490000  | 0.245760000  |
| C | -0.372811000 | -1.280294000 | -0.201222000 |
| C | 1.100702000  | -1.265351000 | 0.224849000  |
| H | -0.893227000 | 2.151260000  | 0.204817000  |
| H | 1.160937000  | 1.315053000  | 1.319796000  |
| H | 1.604456000  | 2.158802000  | -0.155775000 |
| H | 1.846104000  | -0.000208000 | -1.357720000 |
| H | 2.856099000  | -0.000525000 | 0.081799000  |
| H | -1.115567000 | -0.000300000 | 1.363133000  |
| H | -0.894199000 | -2.150627000 | 0.205278000  |
| H | -0.443087000 | -1.339592000 | -1.293637000 |
| H | 1.160536000  | -1.315544000 | 1.319656000  |
| H | 1.603537000  | -2.159232000 | -0.156141000 |
| H | -0.442325000 | 1.339653000  | -1.293749000 |
| O | -2.433463000 | 0.000088000  | -0.053889000 |

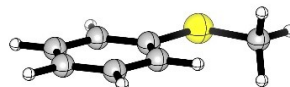

**1a**

$G = -669.791672$  a.u.,  $E = -669.887834$  a.u.

|   |              |              |              |
|---|--------------|--------------|--------------|
| C | -2.632981000 | 0.350538000  | -0.000083000 |
| C | -2.195077000 | -0.974782000 | -0.000077000 |
| C | -0.837361000 | -1.268795000 | -0.000021000 |
| C | 0.110014000  | -0.234703000 | 0.000021000  |

|   |              |              |              |
|---|--------------|--------------|--------------|
| C | -0.327442000 | 1.092828000  | 0.000007000  |
| C | -1.693318000 | 1.376531000  | -0.000041000 |
| H | -3.692418000 | 0.577167000  | -0.000117000 |
| H | -2.914656000 | -1.785672000 | -0.000110000 |
| H | -0.507939000 | -2.301995000 | -0.000011000 |
| H | 0.380539000  | 1.910200000  | 0.000037000  |
| H | -2.017824000 | 2.411087000  | -0.000047000 |
| S | 1.823732000  | -0.721717000 | 0.000082000  |
| C | 2.712006000  | 0.864982000  | 0.000012000  |
| H | 3.771539000  | 0.605289000  | 0.000380000  |
| H | 2.493270000  | 1.445712000  | -0.896933000 |
| H | 2.492728000  | 1.446092000  | 0.896579000  |

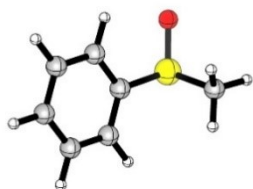

**2a**

$G = -744.994082$  a.u.,  $E = -745.092405$  a.u.

|   |              |              |              |
|---|--------------|--------------|--------------|
| C | -2.863638000 | 0.097212000  | 0.166623000  |
| C | -2.072765000 | 1.227950000  | 0.361515000  |
| C | -0.692531000 | 1.158893000  | 0.176056000  |
| C | -0.125340000 | -0.052233000 | -0.197425000 |
| C | -0.902414000 | -1.188090000 | -0.412338000 |
| C | -2.279558000 | -1.109133000 | -0.222019000 |
| H | -3.936456000 | 0.156025000  | 0.308157000  |
| H | -2.528990000 | 2.166566000  | 0.654011000  |
| H | -0.052218000 | 2.023168000  | 0.308465000  |
| H | -0.447153000 | -2.120218000 | -0.729951000 |
| H | -2.896324000 | -1.985413000 | -0.383905000 |
| C | 2.087330000  | -1.013366000 | 1.071453000  |
| H | 3.172897000  | -1.115934000 | 1.096243000  |
| H | 1.737359000  | -0.426611000 | 1.921365000  |
| H | 1.615945000  | -1.997013000 | 1.051236000  |
| S | 1.676941000  | -0.114818000 | -0.470578000 |
| O | 2.199673000  | 1.301139000  | -0.294946000 |

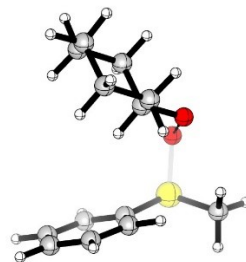

**TS<sub>1a/2a</sub>**

$G = -1055.347802$  a.u.,  $E = -1055.594718$  a.u.

|   |              |              |              |
|---|--------------|--------------|--------------|
| C | -1.877899000 | -2.988478000 | -0.229744000 |
| C | -2.325954000 | -2.484889000 | 0.991957000  |
| C | -2.442435000 | -1.113255000 | 1.183229000  |
| C | -2.103853000 | -0.239420000 | 0.143914000  |
| C | -1.644153000 | -0.736245000 | -1.078561000 |
| C | -1.541059000 | -2.112613000 | -1.259795000 |
| H | -1.790592000 | -4.058363000 | -0.376627000 |
| H | -2.588125000 | -3.160933000 | 1.797085000  |
| H | -2.791892000 | -0.720299000 | 2.131009000  |
| H | -1.358333000 | -0.066432000 | -1.877317000 |
| H | -1.185206000 | -2.498556000 | -2.207821000 |
| C | -2.301022000 | 2.269626000  | -1.126229000 |
| H | -3.130061000 | 1.839990000  | -1.687698000 |
| H | -2.483600000 | 3.327334000  | -0.938236000 |
| H | -1.344422000 | 2.152720000  | -1.635395000 |
| S | -2.188973000 | 1.495035000  | 0.505369000  |
| O | -0.383635000 | 1.954707000  | 0.745554000  |
| C | 4.070219000  | -0.860279000 | 0.190641000  |
| C | 3.204515000  | -0.509227000 | 1.406612000  |
| C | 2.386076000  | 0.764077000  | 1.159535000  |
| C | 1.534324000  | 0.639039000  | -0.104941000 |
| C | 2.402026000  | 0.308042000  | -1.325594000 |
| C | 3.222589000  | -0.967079000 | -1.082664000 |
| H | 1.730556000  | 0.982810000  | 2.005465000  |
| H | 2.522457000  | -1.343727000 | 1.615596000  |
| H | 3.830041000  | -0.388564000 | 2.296700000  |
| H | 4.829404000  | -0.079953000 | 0.052504000  |
| H | 4.609628000  | -1.797315000 | 0.363723000  |
| H | 0.814570000  | -0.179562000 | 0.031317000  |
| H | 1.763010000  | 0.195534000  | -2.206557000 |
| H | 3.074436000  | 1.151838000  | -1.519815000 |
| H | 2.539507000  | -1.820964000 | -0.989482000 |
| H | 3.860275000  | -1.168290000 | -1.949479000 |
| H | 3.057083000  | 1.623221000  | 1.037845000  |
| O | 0.829209000  | 1.829438000  | -0.400415000 |

Following geometries are optimized at the B3LYP-D3/6-311+G(d,p)/SMD(tetrahydrofuran) level of theory:

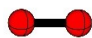

**O<sub>2</sub>**

$G = -150.394530$  a.u.,  $E = -150.378292$  a.u.

|   |             |             |              |
|---|-------------|-------------|--------------|
| O | 0.000000000 | 0.000000000 | 0.602698000  |
| O | 0.000000000 | 0.000000000 | -0.602698000 |

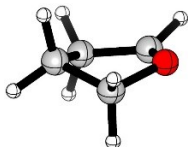

**·C<sub>4</sub>H<sub>7</sub>O**

$G = -231.808131$  a.u.,  $E = -231.882525$  a.u.

|   |              |              |              |
|---|--------------|--------------|--------------|
| C | -1.143727000 | 0.379356000  | -0.173816000 |
| O | -0.767554000 | -0.989987000 | 0.116716000  |
| C | 0.592690000  | -1.095456000 | -0.044418000 |
| C | 1.243797000  | 0.254044000  | -0.137793000 |
| C | 0.078584000  | 1.206252000  | 0.215295000  |
| H | -1.364506000 | 0.460837000  | -1.244059000 |
| H | -2.044229000 | 0.599946000  | 0.398472000  |
| H | 1.023062000  | -1.986960000 | 0.394306000  |
| H | 2.095335000  | 0.357900000  | 0.541372000  |
| H | 1.615482000  | 0.457591000  | -1.150822000 |
| H | 0.066322000  | 1.408574000  | 1.289243000  |
| H | 0.120895000  | 2.156828000  | -0.317847000 |

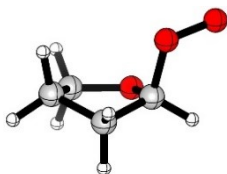

**·OOTHF**

$G = -382.237966$  a.u.,  $E = -382.318235$  a.u.

|   |              |              |              |
|---|--------------|--------------|--------------|
| C | -1.497119000 | -0.966348000 | -0.213656000 |
| O | -0.214900000 | -1.087914000 | 0.477073000  |
| C | 0.364529000  | 0.151713000  | 0.628514000  |
| C | -0.715820000 | 1.196925000  | 0.434054000  |
| C | -1.637774000 | 0.510288000  | -0.585415000 |
| H | -1.483150000 | -1.634884000 | -1.074721000 |
| H | -2.268981000 | -1.295842000 | 0.485815000  |
| H | 0.949927000  | 0.189906000  | 1.545441000  |
| H | -1.222531000 | 1.341965000  | 1.391426000  |
| H | -0.317055000 | 2.155661000  | 0.103764000  |

|   |              |              |              |
|---|--------------|--------------|--------------|
| H | -2.670418000 | 0.852410000  | -0.516919000 |
| H | -1.282197000 | 0.687799000  | -1.602351000 |
| O | 1.365219000  | 0.376230000  | -0.474144000 |
| O | 2.501121000  | -0.244878000 | -0.242108000 |

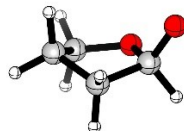

**·OTHF**

$G = -307.052684$  a.u.,  $E = -307.129051$  a.u.

|   |              |              |              |
|---|--------------|--------------|--------------|
| C | 1.350454000  | -0.711975000 | 0.019294000  |
| O | 0.001943000  | -1.201105000 | -0.139394000 |
| C | -0.900985000 | -0.119335000 | -0.356692000 |
| C | -0.018818000 | 1.188442000  | -0.391654000 |
| C | 1.211574000  | 0.755798000  | 0.407360000  |
| H | 1.842414000  | -1.321218000 | 0.778753000  |
| H | 1.889525000  | -0.824786000 | -0.929010000 |
| H | -1.379625000 | -0.253458000 | -1.348826000 |
| H | 0.232431000  | 1.396089000  | -1.432636000 |
| H | -0.557752000 | 2.037190000  | 0.023937000  |
| H | 2.097821000  | 1.338845000  | 0.150689000  |
| H | 1.025539000  | 0.853361000  | 1.479699000  |
| O | -1.877407000 | -0.036846000 | 0.540337000  |

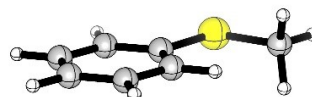

**1a**

$G = -669.793548$  a.u.,  $E = -669.889563$  a.u.

|   |              |              |              |
|---|--------------|--------------|--------------|
| C | -2.633568000 | 0.352908000  | -0.000076000 |
| C | -2.197922000 | -0.973822000 | 0.000127000  |
| C | -0.839829000 | -1.270234000 | 0.000118000  |
| C | 0.108855000  | -0.236563000 | -0.000085000 |
| C | -0.325556000 | 1.092544000  | -0.000288000 |
| C | -1.691693000 | 1.378089000  | -0.000280000 |
| H | -3.692881000 | 0.581286000  | -0.000065000 |
| H | -2.918716000 | -1.783898000 | 0.000283000  |
| H | -0.513668000 | -2.304779000 | 0.000274000  |
| H | 0.383989000  | 1.908793000  | -0.000466000 |
| H | -2.014318000 | 2.413395000  | -0.000444000 |
| S | 1.823878000  | -0.721921000 | -0.000013000 |
| C | 2.714947000  | 0.864550000  | 0.000376000  |
| H | 3.774088000  | 0.602539000  | -0.000671000 |
| H | 2.493288000  | 1.444930000  | -0.895757000 |
| H | 2.494766000  | 1.443646000  | 0.897701000  |



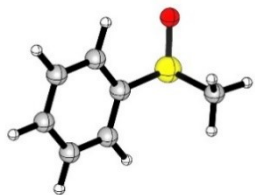

**2a**

$G = -744.998996$  a.u.,  $E = -745.097042$  a.u.

|   |              |              |              |
|---|--------------|--------------|--------------|
| C | -2.865194000 | 0.092610000  | 0.164357000  |
| C | -2.078666000 | 1.226596000  | 0.361081000  |
| C | -0.697400000 | 1.162231000  | 0.177329000  |
| C | -0.125369000 | -0.046742000 | -0.196929000 |
| C | -0.897452000 | -1.186578000 | -0.412176000 |
| C | -2.275474000 | -1.111944000 | -0.223365000 |
| H | -3.938456000 | 0.147240000  | 0.305360000  |
| H | -2.538242000 | 2.163387000  | 0.654744000  |
| H | -0.064526000 | 2.030849000  | 0.315380000  |
| H | -0.438403000 | -2.118457000 | -0.724899000 |
| H | -2.888141000 | -1.991324000 | -0.384703000 |
| C | 2.088608000  | -1.015910000 | 1.067556000  |
| H | 3.173881000  | -1.124105000 | 1.088039000  |
| H | 1.739600000  | -0.433886000 | 1.921352000  |
| H | 1.613561000  | -1.997734000 | 1.039332000  |
| S | 1.675187000  | -0.114901000 | -0.467247000 |
| O | 2.205428000  | 1.305110000  | -0.295722000 |

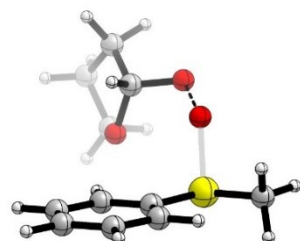

**TS<sub>1a/2a</sub>**

$G = -1051.977395$  a.u.,  $E = -1052.172191$  a.u.

|   |              |              |              |
|---|--------------|--------------|--------------|
| C | 3.227852000  | -2.351373000 | 0.345021000  |
| C | 3.852495000  | -1.122078000 | 0.548169000  |
| C | 3.190757000  | 0.066871000  | 0.247870000  |
| C | 1.893257000  | 0.012415000  | -0.267798000 |
| C | 1.255547000  | -1.218086000 | -0.474136000 |
| C | 1.928855000  | -2.394317000 | -0.163650000 |
| H | 3.749235000  | -3.270995000 | 0.583615000  |
| H | 4.860836000  | -1.082079000 | 0.943719000  |
| H | 3.691016000  | 1.011056000  | 0.413629000  |
| H | 0.238600000  | -1.243060000 | -0.849219000 |
| H | 1.435333000  | -3.346909000 | -0.318316000 |
| C | 1.993066000  | 2.840597000  | -0.228310000 |
| H | 1.390243000  | 3.730651000  | -0.406592000 |
| H | 2.265559000  | 2.783466000  | 0.824269000  |
| H | 2.876754000  | 2.860933000  | -0.867627000 |
| S | 0.929209000  | 1.447742000  | -0.680337000 |
| O | -0.346718000 | 1.539213000  | 0.783499000  |
| C | -3.236065000 | -0.587926000 | -1.271686000 |
| O | -1.963713000 | -0.540862000 | -0.611457000 |
| C | -2.176423000 | -0.075293000 | 0.731076000  |
| C | -3.653625000 | -0.403081000 | 1.068522000  |
| C | -4.192760000 | -1.094101000 | -0.196331000 |
| H | -3.520639000 | 0.413005000  | -1.621008000 |
| H | -3.140796000 | -1.247940000 | -2.135066000 |
| H | -1.448839000 | -0.608962000 | 1.348113000  |
| H | -3.718919000 | -1.028320000 | 1.959595000  |
| H | -4.186567000 | 0.529077000  | 1.267720000  |
| H | -4.108087000 | -2.180523000 | -0.108643000 |
| H | -5.234697000 | -0.844660000 | -0.406000000 |
| O | -2.003834000 | 1.291601000  | 0.856049000  |

## 8. References

- 1 (a) P. Hohenberg and W. Kohn, *Phys. Rev.*, 1964, **136**, B864–B871; (b) W. Kohn and L. J. Sham, *Phys. Rev.*, 1965, **140**, A1133–A1138.
- 2 M. J. Frisch, G. W. Trucks, H. B. Schlegel, G. E. Scuseria, M. A. Robb, J. R. Cheeseman, G. Scalmani, V. Barone, G. A. Petersson, H. Nakatsuji, X. Li, M. Caricato, A. V. Marenich, J. Bloino, B. G. Janesko, R. Gomperts, B. Mennucci, H. P. Hratchian, J. V. Ortiz, A. F. Izmaylov, J. L. Sonnenberg, D. Williams-Young, F. Ding, F. Lipparini, F. Egidi, J. Goings, B. Peng, A. Petrone, T. Henderson, D. Ranasinghe, V. G. Zakrzewski, J. Gao, N. Rega, G. Zheng, W. Liang, M. Hada, M. Ehara, K. Toyota, R. Fukuda, J. Hasegawa, M. Ishida, T. Nakajima, Y. Honda, O. Kitao, H. Nakai, T. Vreven, K. Throssell, J. A. Montgomery Jr, J. E. Peralta, F. Ogliaro, M. J. Bearpark, J. J. Heyd, E. N. Brothers, K. N. Kudin, V. N. Staroverov, T. A. Keith, R. Kobayashi, J. Normand, K. Raghavachari, A. P. Rendell, J. C. Burant, S. S. Iyengar, J. Tomasi, M. Cossi, J. M. Millam, M. Klene, C. Adamo, R. Cammi, J. W. Ochterski, R. L. Martin, K. Morokuma, O. Farkas, J. B. Foresman and D. J. G. R. C. Fox, *Gaussian 16 Revision A.03*, Gaussian Inc., Wallingford, CT, 2016.
- 3 (a) P. J. Stephens and F. J. Devlin, *J. Phys. Chem.*, 1994, **98**, 11623–11627; (b) A. D. Becke, *J. Chem. Phys.*, 1993, **98**, 5648; (c) C. Lee, W. Yang and R. G. Parr, *Phys. Rev. B*, 1988, **37**, 785–789.
- 4 S. Grimme, J. Antony, S. Ehrlich and H. Krieg, *J. Chem. Phys.*, 2010, **132**, 154104.
- 5 (a) R. Ditchfield, W. J. Hehre and J. A. Pople, *J. Chem. Phys.*, 1971, **54**, 724–728; (b) W. J. Hehre, R. Ditchfield and J. A. Pople, *J. Chem. Phys.*, 1972, **56**, 2257–2261; (c) P. C. Hariharan and J. A. Pople, *Theor. Chim. Acta.*, 1973, **28**, 213–222; (d) M. M. Francl, W. J. Pietro, W. J. Hehre, J. S. Binkley, M. S. Gordon, D. J. DeFrees and J. A. Pople, *J. Chem. Phys.*, 1982, **77**, 3654–3665; (e) M. S. Gordon, J. S. Binkley, J. A. Pople, W. J. Pietro and W. J. Hehre, *J. Am. Chem. Soc.*, 1982, **104**, 2797–2803; (f) T. Clark, J. Chandrasekhar, G. n. W. Spitznagel and P. V. R. Schleyer, *J. Comput. Chem.*, 1983, **4**, 294–301; (g) G. W. Spitznagel, T. Clark, P. von Rague Schleyer and W. J. Hehre, *J. Comput. Chem.*, 1987, **8**, 1109–1116.
- 6 A. V. Marenich, C. J. Cramer and D. G. Truhlar, *J. Phys. Chem. B*, 2009, **113**, 6378–6396.
- 7 (a) K. Fukui, *J. Phys. Chem.*, 1970, **74**, 4161–4163; (b) K. Fukui, *Acc. Chem. Res.*, 1981, **14**, 363–368.
- 8 C. Y. Legault, *CYL View, version 1.0 b*, Universite de Sherbrooke, Sherbrooke, Quebec, Canada, 2009; <http://www.cylvview.org>.
